# Supplementary material for: Chemotherapy-Resistant Human Acute Myeloid Leukemia Cells Are Not Enriched for Leukemic Stem Cells but Require Oxidative Metabolism
Source: Oxford University Press journal article supplement (doi:10.1158/2159-8290.cd-16-0441), 2017-04-17
Supplement: 21598290cd160441-sup-164075_2_unknown_upload_3967987_8818bt.xlsx [file 21598290cd160441-sup-164075_2_unknown_upload_3967987_8818bt.xlsx]

## Sheet: Patients
	Clinical data																								In vitro preclinical data				In vivo PDX preclinical data
	ID	Hospital	Status	Induction Treatment	FAB	Karyotype	Cytogenetic Risk Group	Overall survival	Gender	Age	WBC	CD34	MPO	FLT3		NPMc	DNMT3a	IDH1	IDH2	CEBPa	N-RAS	K-RAS	NGSeq	Transcriptome	CD34+38-	OCR	Chemogram	IC50 (AraC)	Total Tumor Burden	Total Tumor Burden	Responder status	Apoptosis
															%										%	(nmol/min/million)		µM	M	fold reduction		fold induction
	53	UPENN	Presumed Rel	-	M2	46,XX	Int	unknown	F	-	183.6	dim	n.d.	ITD	-	+	nd	WT	WT	WT	WT	WT	-	Yes	1.65	-	-	166.8	31.123	7	Low	-
	262	UPENN	n.d.	-	NOS	46,XX	Int	unknown	F	-	382	n.d.	n.d.	ITD	-	n.d.	nd	n.d.	n.d.	n.d.	n.d.	n.d.	-	Yes	1.05	-	-	313	11.4618	7	Low	-
	325	UPENN	Dx	-	NOS	n.d.	n.d.	unknown	F	-	243.9	neg	n.d.	D835	-	WT	nd	R132S	WT	WT	WT	WT	-	Yes	0.21	-	-	4053	1.942	7	Low	-
	973	UPENN	Rel	-	AML-MLD	n.d.	n.d.	unknown	M	-	58.8	dim	n.d.	ITD	-	+	nd	WT	WT	+	WT	WT	-	Yes	-	-	-	-	22.85	5	Low	-
	1956	UPENN	Dx	-	M4	47,XX, +8[8]/46, XX[14]	Int	unknown	F	-	139.1	pos	pos	ITD	50	n.d.	nd	n.d.	n.d.	n.d.	n.d.	n.d.	-	Yes	9.79	1.075	-	10258	4.656	4	Low	-
	Ps01	TUH	Dx	"3+7"	M4	46,XX	Int	77	F	75.0164	253	98	99	ITD	<50	WT	n.d.	n.d.	WT	n.d.	n.d.	n.d.	-	Yes	2.5	2.1	Yes	122.1	6.4125	6	Low	3
	Ps02	TUH	Dx	BSC	M1	46,XX	Int	2	F	82.3397	106	0	99	ITD	33	+	n.d.	n.d.	WT	n.d.	n.d.	n.d.	-	Yes	0.82	0.94	Yes	4606	7.675	8	Low	-
	Ps03	TUH	Dx	LD-ARAC	M4	46,XY	Int	1	M	87.7534	288	1	93	ITD	<50	WT	n.d.	WT	WT	n.d.	n.d.	n.d.	-	-	-	-	-	-	4.93333	5	Low	-
	Ps04	TUH	Dx	"3+7"	M1	47,XX, +10	Int	384	F	58.3342	182	8	5	WT	-	WT	n.d.	n.d.	WT	n.d.	n.d.	n.d.	-	Yes	2.78	2.8	Yes	242.5	19.84	14	High	13
	Ps05	TUH	Dx	"3+7"	M1	46,XX	Int	3071	F	38.2795	85.5	2	93	WT	-	+	WT	R132H	WT	n.d.	n.d.	n.d.	-	Yes	1.02	2.8	Yes	2904	4.945	18	High	5
	Ps06	TUH	Dx	"3+7"	M1	46,XX	Int	1179	F	59.6438	224	0	70	WT	-	+	WT	n.d.	WT	WT	n.d.	n.d.	-	Yes	16.3	2.07	Yes	122.2	19.7286	13	High	10
	Ps07	TUH	Dx	"3+7"	M1	46,XY	Int	2189	M	65.8822	132	0	95	ITD	17	WT	n.d.	n.d.	n.d.	n.d.	n.d.	n.d.	-	Yes	2.93	1.13	Yes	1058	21.342	10	Low	6
	Ps08	TUH	Rel	"3+7"	M2	46,XX	Int	390	F	61.2329	225	2	84	WT	-	WT	n.d.	n.d.	n.d.	WT	n.d.	n.d.	-	-	-	-	-	-	56.8	33	High	6
	Ps09	TUH	Dx	LD-ARAC	M1	46,XX<20>	Int	27	F	78.6164	247	82	48	ITD	101	WT	n.d.	n.d.	n.d.	n.d.	n.d.	n.d.	-	Yes	20.5	2.96	Yes	4229	56.9923	8	Low	3
	Ps10	TUH	Dx	"3+7"	M4	46,XY	Int	758	M	24.2712	112	100	3	ITD	13	WT	1	n.d.	n.d.	n.d.	WT	WT	-	Yes	0.21	3.52	Yes	217.8	7.41596	35	High	2
	Ps11	TUH	Rel	VP16	NOS	42,XY,dic(4;8)(q11;p12),der(5)t(5;?18)(q13;q11),der(7)t(4;7)(q11;q31),-12,add(16)(q21),der(17)t(17;22)(p12;q11) or der(17)t(16;17)(q21;p12),-22<19>/46,XY<2>	Unfav	1136	M	70.9808	17.9	89	5	n.d.	-	n.d.	n.d.	n.d.	n.d.	n.d.	n.d.	n.d.	-	Yes	87	-	-	4161	6.8325	16	High	2
	Ps12	TUH	Dx	"3+7"	M4	47,XY,inv(16)(p13q22),+22<15>/46,XY<1>	Fav	777	M	52.1808	137	96	97	n.d.	-	n.d.	n.d.	n.d.	n.d.	n.d.	n.d.	n.d.	-	Yes	1.54	1.9	Yes	204.1	8.78833	7	Low	2
	Ps13	TUH	Dx	"3+7"	M5	46,XY,t(11;17)(q23;q12)<19>/46,XY<1>	Unfav	727	M	63.3014	61.3	0	99	n.d.	-	n.d.	n.d.	n.d.	n.d.	n.d.	n.d.	n.d.	-	Yes	0.023	-	Yes	970.3	9.84912	20	High	2
	Ps14	TUH	Dx	"3+7"	M5	46,XX	Int	176	F	64.4	306.8	12	12	WT	-	+	1	WT	WT	WT	n.d.	n.d.	-	Yes	0.45	-	Yes	1182	28.8226	6	Low	3
	Ps15	TUH	Dx	"3+7"	M1	46,XX	Int	324	F	22.2438	161	63	15	WT	9	+	+	WT	WT	WT	n.d.	n.d.	-	Yes	12.1	1.525	Yes	105.7	10.8479	46	High	6
	Ps16	TUH	Dx	"3+7"	M1	46,XX<20>	Int	404	F	52.937	113	100	87	ITD	48	+	1	WT	WT	WT	n.d.	n.d.	-	-	0.13	2.625	-	11574	19.9745	9	Low	2
	Ps17	TUH	Dx	arac 420*7	M4	47,XY,inv(16)(p13q22),+22<20>	Fav	617	M	54.6603	71.2	93	90	n.d.	-	n.d.	n.d.	n.d.	n.d.	n.d.	n.d.	n.d.	-	Yes	25	-	Yes	1059	7.37886	13	High	6
	Ps18	TUH	Rel	Arac int + VP16	M2	46,XX,t(9;11)(p23;q23)<1>/47,sl,+add(21)(p11)<12>/48,sdl,+4<2>/46,XX<5>	Int	152	F	67.4904	7.11	95	10	WT	-	WT	n.d.	n.d.	n.d.	n.d.	n.d.	n.d.	-	Yes	83.8	2.425	Yes	1145	7.70687	21	High	7
	Ps19	TUH	Dx	"3+7"	M1	46,XY	Int	253	M	72.0493	93.61	55	86	ITD	272	+	n.d.	WT	WT	n.d.	n.d.	n.d.	Yes	-	-	-	Yes	-	4	9	Low	4
	Ps20	TUH	Dx	"3+7"	M4	46,XX	Int	538	F	35.9781	207.6	100	1	ITD	46	WT	WT	WT	WT	WT	n.d.	n.d.	-	-	0	1.725	Yes	186.6	-	-	-	-
	Ps21	TUH	Dx	"3+7"	M1	46,XX,t(1;6)(p10;q10),inv3(p14q24)<20>	Unfav	336	F	77.6904	263.6	88	0	WT	-	WT	n.d.	WT	WT	WT	n.d.	n.d.	-	-	2.83	0.25	Yes	45530	-	-	-	-
	Ps22	TUH	Dx	"3+7"	M4	46,XY	Int	199	M	32.589	97.1	0	96	ITD	169	+	1	WT	WT	WT	n.d.	n.d.	Yes	Yes	0.058	1.475	Yes	-	75	11	High	7

## Sheet: Cell Lines
Name	Gender	FAB		Karyotype	Model for	FLT3		NPM1	IDH1	IDH2	IDH2	DNMT3A	CEBPa	Kit	NRas	KRas	WT1	p53	c-Myc	PTEN
						ITD	TKD		R132	R140	R172
KG1a	M	M0	Relapse	complex	FGFR1OP2-FGFR1	wt	wt	wt	wt	wt	wt	wt	wt	wt	+	wt	wt	mutated	overexpressed	mutated
KG1	M	M0/1	Relapse	complex	FGFR1OP2-FGFR1	wt	wt	wt	wt	wt	wt	wt	wt	wt	wt	wt	wt	mutated
HL-60	F	M2	Dx	complex	AML-M2/3	wt	wt	wt	wt	wt	wt	wt	wt	wt	+	wt	+	null; deleted	amplified	wt
MV4-11*	M	M5	Dx	complex	MLL-AF4 w/FLT3-ITD	ITD	wt	wt	wt	wt	wt	wt		wt	wt	wt	wt	wt	overexpressed	wt
MOLM14	M	M5	Relapse	complex	MLL-AF9 w/FLT3-ITD	ITD	wt	wt	wt	wt	wt	wt	wt	wt	wt	wt	+	wt	overexpressed	wt
U937	M	M5	Refractory	t(10;11)(p13;q14)	CALM-AF10	wt	wt	wt	wt	wt	wt	wt	wt	wt	wt	wt	+	null; deleted	overexpressed	null
Abbreviations: F, female; M, male; wt, wild type; Dx, diagnosis. * childhood
