# Supplementary material for: Chemotherapy-Resistant Human Acute Myeloid Leukemia Cells Are Not Enriched for Leukemic Stem Cells but Require Oxidative Metabolism
Source: Oxford University Press journal article supplement (doi:10.1158/2159-8290.cd-16-0441), 2017-04-17
Supplement: 21598290cd160441-sup-164075_2_unknown_upload_3967988_6616bv.xlsx [file 21598290cd160441-sup-164075_2_unknown_upload_3967988_6616bv.xlsx]

## Sheet: Feuil1
Bone Marrow
Patient Mice		Number of cells injected											LIC Frequency
		50	500	1000	5000	20000	50000	100000	200000	300000	1250000	3000000	One LIC in MNCs
1956	Vehicle	0/5	0/4	1/3	2015-03-02	4/4	8/8			2015-04-04	2015-04-04	2015-04-04	4300
													(2 600 –7 230)
	Ara-C	0/2	0/3	0/5	4/4	2/4	7/8			2015-04-04	2015-04-04	2015-04-04	17100
													(11 920 –24 480)
VAN	Vehicle		0/4		0/3		3/3			2015-07-07			21880
													(11 590 –41 320)
	Ara-C		0/4		2015-03-01		2015-03-02			2015-04-04			34220
													(17 960 –65 220)
SHE	Vehicle	2015-04-02	0/4		2015-04-03			2015-04-04					2450
													(1 415 –4 250)
	Ara-C	0/4	0/4		3/4			2015-04-04					4440
													(2 470 –7 985)
973	Vehicle	0/4	0/4		2015-04-03		2015-06-06		2015-05-05				4439
													(2 471 _ 7 974)
	Ara-C	2015-04-01	0/5		2015-05-03		2015-06-06		2015-04-04				4417
													(2 772 _ 8 025)
Spleen
Patient Mice		Number of cells injected										LIC Frequency
		50	500	1000	5000	20000	50000	200000	300000	1250000	3000000	One LIC in MNCs
1956	Vehicle	0/5	0/4	1/3	2015-03-02	4/4	8/8		2015-04-04	2015-04-04	2015-04-04	4300
												(2 600 –7 230)
	Ara-C	0/2	0/3	0/5	4/4	2/4	7/8		2015-04-04	2015-04-04	2015-04-04	17100
												(11 920 –24 480)
VAN	Vehicle		0/4		0/3		3/3		2015-07-07			21880
												(11 590 –21 880)
	Ara-C		0/4		2015-03-01		2015-03-02		2015-04-04			34220
												(17 960 –65 220)
973	Vehicle	0/4	0/4		2015-04-01		2015-06-06	2015-05-05				12997
												(7 535 - 22 418)
	Ara-C	0/4	0/5		0/5		2015-06-06	2015-04-04				20227
												(12 703 - 22 206)
