# Supplementary material for: Chemotherapy-Resistant Human Acute Myeloid Leukemia Cells Are Not Enriched for Leukemic Stem Cells but Require Oxidative Metabolism
Source: Oxford University Press journal article supplement (doi:10.1158/2159-8290.cd-16-0441), 2017-04-17
Supplement: 21598290cd160441-sup-164075_2_unknown_upload_3967990_6616c0.xlsx [file 21598290cd160441-sup-164075_2_unknown_upload_3967990_6616c0.xlsx]

## Sheet: (1) Oxphos.high_vs_low
Affymetrix ID	Gene Symbol	GnName	log2Ratio	FC	pval	fdr
16657436	DDX11L1		-0.290808	-1.22333	0.00078885	0.00271362
16657440	MIR1302-11		-0.158403	-1.11605	0.0346364	0.0810518
16657445	OR4F5	olfactory receptor, family 4, subfamily F, member 5	-0.0117883	-1.0082	0.87536	0.930687
16657450	LOC100132062		-0.668095	-1.58897	1.43075e-08	1.16736e-07
16657469	LINC00266-1		0.12712	1.09211	0.18591	0.322498
16657473	OR4F29		-0.0721667	-1.05129	0.567079	0.714242
16657476	LOC100508047		-0.0895767	-1.06406	0.132309	0.246592
16657485	MTND2P28		0.0354217	1.02486	0.670459	0.7933
16657492	LOC100287934	uncharacterized LOC100287934	0.32807	1.25533	0.0239825	0.0589171
16657502	LOC100287934	uncharacterized LOC100287934	1.09326	2.13355	8.21982e-09	7.00388e-08
16657506	FAM87B	family with sequence similarity 87, member B	0.06836	1.04852	0.416589	0.582365
16657514	LINC01128	long intergenic non-protein coding RNA 1128	-0.443062	-1.35949	4.83165e-06	2.48909e-05
16657529	LOC284600	uncharacterized LOC284600	-0.285487	-1.21882	0.026295	0.0638194
16657534	SAMD11	sterile alpha motif domain containing 11	0.325892	1.25344	0.000125238	0.000501441
16657554	KLHL17	kelch-like family member 17	0.528057	1.44199	5.37782e-08	3.92272e-07
16657572	PLEKHN1	pleckstrin homology domain containing, family N member 1	-0.471493	-1.38654	3.1094e-06	1.65477e-05
16657594	ISG15	ISG15 ubiquitin-like modifier	-0.264793	-1.20146	0.00847748	0.0235133
16657598	AGRN	agrin	-0.316487	-1.24529	4.4979e-05	0.000195313
16657647	LINC01342	long intergenic non-protein coding RNA 1342	-0.0202217	-1.01412	0.770378	0.86428
16657650	MIR200B	microRNA 200b	0.110865	1.07988	0.233639	0.383167
16657652	MIR200A	microRNA 200a	0.0710383	1.05047	0.295802	0.457063
16657654	MIR429	microRNA 429	0.0274633	1.01922	0.639526	0.77092
16657656	TTLL10	tubulin tyrosine ligase-like family member 10	-0.379728	-1.3011	3.64412e-07	2.28549e-06
16657680	B3GALT6	UDP-Gal:betaGal beta 1,3-galactosyltransferase polypeptide 6	-0.730557	-1.65928	6.10278e-08	4.40835e-07
16657683	SCNN1D	sodium channel, non voltage gated 1 delta subunit	-0.0557467	-1.0394	0.449466	0.611708
16657713	PUSL1	pseudouridylate synthase-like 1	0.150612	1.11004	0.148689	0.270333
16657730	CPTP	ceramide-1-phosphate transfer protein	-0.820793	-1.76638	1.86641e-10	2.1431e-09
16657737	TAS1R3	taste receptor, type 1, member 3	0.156678	1.11472	0.0447356	0.100763
16657751	LOC148413	uncharacterized LOC148413	0.242098	1.18271	0.000763679	0.00263464
16657761	TMEM88B	transmembrane protein 88B	0.24999	1.1892	0.00414861	0.0122793
16657767	VWA1	von Willebrand factor A domain containing 1	-0.206707	-1.15405	0.0181255	0.046161
16657777	ATAD3C	ATPase family, AAA domain containing 3C	0.080555	1.05742	0.338325	0.502871
16657793	ATAD3B	ATPase family, AAA domain containing 3B	-0.0400933	-1.02818	0.776731	0.868094
16657821	ATAD3A		-0.047725	-1.03363	0.605914	0.744512
16657845	SSU72	SSU72 homolog, RNA polymerase II CTD phosphatase	-0.146105	-1.10658	0.194759	0.33398
16657848	LOC284628	uncharacterized LOC284628	0.00753833	1.00524	0.94639	0.970559
16657856	MIB2	mindbomb E3 ubiquitin protein ligase 2	-0.12978	-1.09413	0.0842313	0.171425
16657895	MMP23B		0.0158283	1.01103	0.830108	0.90309
16657910	MMP23A		0.00287833	1.002	0.964675	0.98077
16657917	SLC35E2	solute carrier family 35, member E2	0.046955	1.03308	0.626791	0.760837
16657926	CALML6	calmodulin-like 6	-0.0238533	-1.01667	0.730282	0.836739
16657938	GABRD	gamma-aminobutyric acid (GABA) A receptor, delta	0.101842	1.07314	0.247675	0.400433
16657948	PRKCZ	protein kinase C, zeta	-0.84168	-1.79214	1.1577e-12	2.04257e-11
16657993	SKI	SKI proto-oncogene	0.33807	1.26406	4.97679e-05	0.000214266
16658005	RER1	retention in endoplasmic reticulum sorting receptor 1	-0.191282	-1.14178	0.0128728	0.0341741
16658020	PLCH2	phospholipase C, eta 2	0.00632	1.00439	0.929133	0.960631
16658023	PLCH2	phospholipase C, eta 2	-0.00915167	-1.00636	0.899649	0.944776
16658064	TNFRSF14	tumor necrosis factor receptor superfamily, member 14	-0.354573	-1.27861	0.000245927	0.000930999
16658102	LOC100996583	uncharacterized LOC100996583	-0.0723717	-1.05144	0.38936	0.55612
16658106	FAM213B	family with sequence similarity 213, member B	-0.532465	-1.4464	1.70553e-07	1.13311e-06
16658129	ACTRT2	actin-related protein T2	0.0175333	1.01223	0.837465	0.907911
16658135	PRDM16	PR domain containing 16	0.16626	1.12215	0.0223954	0.0554987
16658157	MIR4251	microRNA 4251	-0.014735	-1.01027	0.833445	0.905401
16658159	ARHGEF16	Rho guanine nucleotide exchange factor (GEF) 16	0.0266117	1.01862	0.754394	0.85334
16658184	TPRG1L	tumor protein p63 regulated 1-like	-0.270593	-1.2063	0.0160868	0.0415852
16658192	TP73	tumor protein p73	1.38187	2.60606	1.68757e-15	5.10502e-14
16658210	CCDC27	coiled-coil domain containing 27	-0.13646	-1.0992	0.042108	0.0957195
16658226	SMIM1	small integral membrane protein 1 (Vel blood group)	0.0715	1.05081	0.243516	0.395512
16658231	DFFB	DNA fragmentation factor, 40kDa, beta polypeptide (caspase-activated DNase)	0.0340633	1.02389	0.724811	0.832532
16658248	LINC01134	long intergenic non-protein coding RNA 1134	-0.03302	-1.02315	0.698013	0.813116
16658254	LINC01346	long intergenic non-protein coding RNA 1346	0.04029	1.02832	0.621548	0.756485
16658268	LOC284661	uncharacterized LOC284661	-0.0250383	-1.01751	0.741151	0.84416
16658289	AJAP1	adherens junctions associated protein 1	0.000625	1.00043	0.992124	0.996027
16658312	KCNAB2	potassium channel, voltage gated subfamily A regulatory beta subunit 2	-0.250498	-1.18962	0.00708936	0.0199926
16658350	RNF207	ring finger protein 207	0.79321	1.73293	3.29226e-09	2.99358e-08
16658379	LINC00337	long intergenic non-protein coding RNA 337	-0.548288	-1.46235	7.03107e-05	0.000293959
16658385	HES3	hes family bHLH transcription factor 3	0.21895	1.16389	0.00069701	0.00242485
16658390	ESPN	espin	-0.0163117	-1.01137	0.888316	0.9381
16658414	TAS1R1	taste receptor, type 1, member 1	-0.00501833	-1.00348	0.952804	0.974386
16658428	ZBTB48	zinc finger and BTB domain containing 48	0.191007	1.14156	0.00630325	0.0179816
16658449	PHF13	PHD finger protein 13	-0.587282	-1.50241	3.41216e-07	2.1527e-06
16658457	THAP3	THAP domain containing, apoptosis associated protein 3	-0.20781	-1.15493	0.0166651	0.0428965
16658471	LOC100505887	uncharacterized LOC100505887	-0.01535	-1.0107	0.823347	0.898655
16658479	CAMTA1	calmodulin binding transcription activator 1	-0.483033	-1.39768	6.21261e-09	5.40488e-08
16658525	CAMTA1	calmodulin binding transcription activator 1	0.257725	1.19559	0.0581083	0.125458
16658528	VAMP3	vesicle-associated membrane protein 3	-0.705835	-1.63109	3.45533e-09	3.12279e-08
16658536	PER3	period circadian clock 3	-2.31626	-4.98038	6.87886e-21	7.50804e-19
16658568	PARK7	parkinson protein 7	-0.203113	-1.15118	0.0019394	0.00617528
16658589	LOC102724539	uncharacterized LOC102724539	0.0273383	1.01913	0.71721	0.826975
16658594	SLC45A1	solute carrier family 45, member 1	-0.0506683	-1.03574	0.518159	0.672807
16658609	LOC102724552	uncharacterized LOC102724552	-0.0408517	-1.02872	0.607364	0.745494
16658619	ENO1-AS1	ENO1 antisense RNA 1	-0.309733	-1.23948	0.000433551	0.00157274
16658622	CA6	carbonic anhydrase VI	-0.293355	-1.22549	0.00345284	0.010406
16658641	LOC102724571	uncharacterized LOC102724571	0.293722	1.2258	0.00032651	0.00120917
16658644	H6PD	hexose-6-phosphate dehydrogenase (glucose 1-dehydrogenase)	-0.205468	-1.15306	0.040488	0.0925572
16658655	SPSB1	splA/ryanodine receptor domain and SOCS box containing 1	-0.475857	-1.39074	5.27695e-08	3.85764e-07
16658664	SLC25A33	solute carrier family 25 (pyrimidine nucleotide carrier), member 33	-0.354095	-1.27818	1.29217e-05	6.18219e-05
16658674	TMEM201	transmembrane protein 201	-0.68896	-1.61212	4.6232e-08	3.41746e-07
16658690	PIK3CD	phosphatidylinositol-4,5-bisphosphate 3-kinase, catalytic subunit delta	1.18486	2.27341	2.00859e-16	7.5094e-15
16658736	NMNAT1	nicotinamide nucleotide adenylyltransferase 1	-0.118253	-1.08542	0.0932409	0.186301
16658752	RBP7	retinol binding protein 7, cellular	0.0230467	1.0161	0.76188	0.858288
16658758	UBE4B	ubiquitination factor E4B	-0.203195	-1.15125	0.00861373	0.0238468
16658802	KIF1B	kinesin family member 1B	-0.39476	-1.31472	2.32978e-05	0.000106457
16658864	PGD	phosphogluconate dehydrogenase	0.0140667	1.0098	0.815168	0.894281
16658889	APITD1		-0.0858617	-1.06132	0.193262	0.332427
16658909	PEX14	peroxisomal biogenesis factor 14	-0.27242	-1.20783	0.00335006	0.0101157
16658926	TARDBP	TAR DNA binding protein	-0.171098	-1.12592	0.0158963	0.0411558
16658954	MTOR-AS1	MTOR antisense RNA 1	-0.036775	-1.02582	0.663989	0.788902
16658962	ANGPTL7	angiopoietin-like 7	0.0311917	1.02186	0.66714	0.791258
16658973	UBIAD1	UbiA prenyltransferase domain containing 1	-0.418733	-1.33675	4.15197e-06	2.15947e-05
16658991	PTCHD2	patched domain containing 2	-0.205833	-1.15335	0.0761444	0.157353
16659017	LOC101929181	uncharacterized LOC101929181	0.047025	1.03313	0.636405	0.768665
16659021	FBXO44	F-box protein 44	-0.506403	-1.4205	2.0441e-05	9.43434e-05
16659036	FBXO6	F-box protein 6	-0.862047	-1.81762	7.45155e-11	9.24755e-10
16659046	DRAXIN	dorsal inhibitory axon guidance protein	-0.0866867	-1.06193	0.146792	0.267766
16659054	AGTRAP		-0.505657	-1.41977	7.84206e-08	5.53851e-07
16659070	C1orf167	chromosome 1 open reading frame 167	0.0200017	1.01396	0.74447	0.846167
16659102	CLCN6	chloride channel, voltage-sensitive 6	-0.409725	-1.32843	4.49375e-07	2.77628e-06
16659133	NPPA-AS1	NPPA antisense RNA 1	0.0523233	1.03693	0.587758	0.73097
16659138	RNU5E-1	RNA, U5E small nuclear 1	0.376102	1.29783	0.00271781	0.00837982
16659140	PLOD1	procollagen-lysine, 2-oxoglutarate 5-dioxygenase 1	-0.755212	-1.68788	8.65458e-12	1.29134e-10
16659171	MFN2	mitofusin 2	0.0478433	1.03372	0.4726	0.632192
16659200	MIIP	migration and invasion inhibitory protein	0.224373	1.16827	0.0054517	0.0157636
16659217	TNFRSF8	tumor necrosis factor receptor superfamily, member 8	0.863322	1.81922	9.35227e-12	1.38711e-10
16659238	TNFRSF1B	tumor necrosis factor receptor superfamily, member 1B	-0.515962	-1.42995	1.64872e-06	9.21877e-06
16659251	VPS13D	vacuolar protein sorting 13 homolog D (S. cerevisiae)	-0.442845	-1.35928	1.26862e-05	6.08516e-05
16659338	SNORA59A		-0.14336	-1.10447	0.198559	0.338586
16659343	AADACL4	arylacetamide deacetylase-like 4	-0.053005	-1.03742	0.410759	0.576786
16659349	AADACL3	arylacetamide deacetylase-like 3	-0.00893167	-1.00621	0.919576	0.955125
16659357	C1orf158	chromosome 1 open reading frame 158	0.10014	1.07188	0.0868621	0.175783
16659366	PRAMEF12	PRAME family member 12	0.0519767	1.03668	0.654657	0.781931
16659371	PRAMEF1		0.02737	1.01915	0.647331	0.77659
16659380	PRAMEF2	PRAME family member 2	0.17262	1.1271	0.0223986	0.055502
16659387	PRAMEF7		0.0223083	1.01558	0.758462	0.856056
16659395	PRAMEF22		-0.0585783	-1.04144	0.695558	0.811588
16659407	PRAMEF5		0.104223	1.07492	0.228537	0.376936
16659413	PRAMEF15		0.156458	1.11455	0.0152791	0.0397131
16659422	PRAMEF16		-0.0221933	-1.0155	0.869478	0.927333
16659428	PRAMEF20	PRAME family member 20	0.138037	1.10041	0.0649943	0.137878
16659434	PRAMEF15		0.156458	1.11455	0.0152791	0.0397131
16659443	PRAMEF17		0.013705	1.00954	0.842208	0.911103
16659449	PRAMEF20	PRAME family member 20	0.132283	1.09603	0.101275	0.199264
16659459	PDPN	podoplanin	0.0297433	1.02083	0.715828	0.826053
16659478	PRDM2	PR domain containing 2, with ZNF domain	-0.59131	-1.50661	1.32165e-07	8.93405e-07
16659501	C1orf196		0.023095	1.01614	0.750505	0.850652
16659508	KAZN	kazrin, periplakin interacting protein	-0.301133	-1.23211	0.000493506	0.00177062
16659537	TMEM51	transmembrane protein 51	-0.421605	-1.33942	1.27363e-05	6.10526e-05
16659545	FHAD1	forkhead-associated (FHA) phosphopeptide binding domain 1	-0.0747467	-1.05318	0.231426	0.380416
16659605	EFHD2	EF-hand domain family, member D2	-0.207172	-1.15442	0.00866869	0.0239789
16659612	CTRC	chymotrypsin C (caldecrin)	0.0193533	1.01351	0.81082	0.891391
16659623	CELA2A	chymotrypsin-like elastase family, member 2A	0.193152	1.14326	0.0772005	0.159215
16659637	CELA2B	chymotrypsin-like elastase family, member 2B	-0.034725	-1.02436	0.589899	0.732672
16659650	DNAJC16	DnaJ (Hsp40) homolog, subfamily C, member 16	0.060275	1.04266	0.355306	0.52094
16659686	DDI2		-0.0140717	-1.0098	0.859268	0.920854
16659704	PLEKHM2	pleckstrin homology domain containing, family M (with RUN domain) member 2	-0.369248	-1.29168	1.22573e-06	7.00752e-06
16659727	SLC25A34	solute carrier family 25, member 34	-0.16615	-1.12206	0.018506	0.0470057
16659737	TMEM82	transmembrane protein 82	0.0183317	1.01279	0.817917	0.895713
16659746	FBLIM1	filamin binding LIM protein 1	-0.0773833	-1.0551	0.347078	0.512103
16659765	SPEN	spen family transcriptional repressor	-0.101175	-1.07265	0.112583	0.216905
16659788	C1orf64	chromosome 1 open reading frame 64	0.077325	1.05506	0.328626	0.492312
16659794	CLCNKA	chloride channel, voltage-sensitive Ka	-0.00811167	-1.00564	0.924995	0.957815
16659825	CLCNKB	chloride channel, voltage-sensitive Kb	0.0669533	1.0475	0.499941	0.656814
16659853	LOC101927479	uncharacterized LOC101927479	0.118098	1.0853	0.11094	0.214265
16659862	ARHGEF19-AS1		-0.0629783	-1.04462	0.453223	0.615024
16659865	SZRD1	SUZ RNA binding domain containing 1	-0.190845	-1.14143	0.0116016	0.0311885
16659881	NECAP2	NECAP endocytosis associated 2	-0.0799033	-1.05695	0.1902	0.328278
16659911	LOC100133616		0.170273	1.12527	0.0378217	0.087414
16659916	MIR3675	microRNA 3675	-0.13504	-1.09812	0.0602459	0.129333
16659918	CROCCP2	ciliary rootlet coiled-coil, rootletin pseudogene 2	-0.205387	-1.153	0.0149449	0.0389395
16659921	MST1P2		-0.439532	-1.35616	3.76679e-06	1.9743e-05
16659936	LOC729587		-0.200058	-1.14874	0.00145881	0.00476835
16659938	MIR3675	microRNA 3675	-0.13504	-1.09812	0.0602459	0.129333
16659944	LOC440570		-0.0576983	-1.0408	0.561631	0.709821
16659951	CROCC	ciliary rootlet coiled-coil, rootletin	0.022645	1.01582	0.732325	0.838177
16660008	LOC400743	uncharacterized LOC400743	0.0407867	1.02867	0.668513	0.791846
16660014	PADI1	peptidyl arginine deiminase, type I	0.068575	1.04868	0.310848	0.473631
16660038	PADI3	peptidyl arginine deiminase, type III	0.0349683	1.02453	0.772967	0.865999
16660057	MIR3972	microRNA 3972	0.15557	1.11386	0.152559	0.275972
16660059	PADI4	peptidyl arginine deiminase, type IV	-0.162375	-1.11913	0.0893083	0.179781
16660081	PADI6	peptidyl arginine deiminase, type VI	0.000318333	1.00022	0.996601	0.998348
16660103	ARHGEF10L	Rho guanine nucleotide exchange factor (GEF) 10-like	-0.30767	-1.23771	0.000446344	0.00161482
16660151	ACTL8	actin-like 8	-1.27696	-2.42328	4.17646e-15	1.16741e-13
16660156	IGSF21	immunoglobin superfamily, member 21	0.038075	1.02674	0.66345	0.78845
16660175	KLHDC7A	kelch domain containing 7A	0.0157083	1.01095	0.844633	0.912396
16660182	PAX7	paired box 7	0.00767	1.00533	0.902639	0.946207
16660196	LOC284513		-0.343595	-1.26891	0.00290568	0.00889343
16660199	MRTO4	MRT4 homolog, ribosome maturation factor	0.177837	1.13119	0.0237054	0.0583291
16660212	PQLC2	PQ loop repeat containing 2	0.0948283	1.06794	0.272451	0.430414
16660228	PQLC2		0.514423	1.42842	1.90109e-06	1.04843e-05
16660236	MINOS1		0.0586617	1.0415	0.401778	0.568326
16660260	HTR6	5-hydroxytryptamine (serotonin) receptor 6, G protein-coupled	-0.135418	-1.09841	0.122242	0.231723
16660269	OTUD3	OTU deubiquitinase 3	-0.472515	-1.38753	3.16134e-06	1.67972e-05
16660282	PLA2G5	phospholipase A2, group V	0.0683767	1.04854	0.41296	0.578649
16660299	PLA2G2F	phospholipase A2, group IIF	-0.148197	-1.10818	0.0858415	0.174156
16660313	UBXN10	UBX domain protein 10	0.492887	1.40726	1.82587e-06	1.00994e-05
16660324	VWA5B1	von Willebrand factor A domain containing 5B1	0.116943	1.08443	0.16758	0.296959
16660356	FAM43B	family with sequence similarity 43, member B	-0.031375	-1.02199	0.657575	0.783938
16660360	CDA	cytidine deaminase	-2.51354	-5.71018	4.8127e-21	5.57993e-19
16660367	PINK1	PTEN induced putative kinase 1	-0.712855	-1.63904	3.01405e-11	4.05278e-10
16660388	LOC100506824		0.0745083	1.053	0.361874	0.528256
16660392	LOC100506801	uncharacterized LOC100506801	0.105182	1.07563	0.204653	0.346432
16660403	NBPF3	neuroblastoma breakpoint family, member 3	-0.781725	-1.71919	1.10603e-07	7.59886e-07
16660436	ALPL	alkaline phosphatase, liver/bone/kidney	0.0259417	1.01814	0.671762	0.794305
16660458	LDLRAD2	low density lipoprotein receptor class A domain containing 2	-0.052055	-1.03674	0.540985	0.691775
16660468	CELA3B	chymotrypsin-like elastase family, member 3B	-0.0848167	-1.06055	0.344617	0.509474
16660483	CELA3A	chymotrypsin-like elastase family, member 3A	0.149873	1.10947	0.164979	0.293206
16660497	LINC00339	long intergenic non-protein coding RNA 339	-0.8331	-1.78151	6.62936e-07	3.97695e-06
16660503	CDC42	cell division cycle 42	-0.127763	-1.0926	0.0302843	0.0722136
16660518	CDC42-IT1	CDC42 intronic transcript 1	0.0325333	1.02281	0.77238	0.865797
16660527	ZBTB40	zinc finger and BTB domain containing 40	0.230577	1.1733	0.000526733	0.00187673
16660552	ZBTB40-IT1		-0.04746	-1.03344	0.579928	0.724867
16660555	EPHA8	EPH receptor A8	0.00155833	1.00108	0.982321	0.99023
16660575	C1QA	complement component 1, q subcomponent, A chain	-0.082855	-1.05911	0.322513	0.485741
16660581	C1QC	complement component 1, q subcomponent, C chain	0.0515083	1.03635	0.551745	0.701469
16660587	C1QB	complement component 1, q subcomponent, B chain	0.0243967	1.01705	0.772868	0.865986
16660596	EPHB2	EPH receptor B2	0.0274883	1.01924	0.68913	0.806679
16660620	MIR4684	microRNA 4684	-0.238492	-1.17976	0.0124854	0.0332613
16660624	KDM1A	lysine (K)-specific demethylase 1A	-0.113515	-1.08186	0.0210106	0.0525432
16660648	MIR3115	microRNA 3115	-0.0308167	-1.02159	0.84402	0.912164
16660654	ZNF436-AS1	ZNF436 antisense RNA 1	0.120323	1.08698	0.108264	0.210172
16660664	MDS2	myelodysplastic syndrome 2 translocation associated	-0.02721	-1.01904	0.707853	0.820664
16660673	RPL11	ribosomal protein L11	0.444538	1.36088	8.1998e-07	4.82769e-06
16660685	TCEB3	transcription elongation factor B (SIII), polypeptide 3 (110kDa, elongin A)	-0.239923	-1.18093	0.00243927	0.00759407
16660700	PITHD1	PITH (C-terminal proteasome-interacting domain of thioredoxin-like) domain containing 1	0.23972	1.18076	0.00272223	0.00839042
16660713	LYPLA2		0.136228	1.09903	0.288843	0.448999
16660734	MIR378F	microRNA 378f	-0.00564333	-1.00392	0.956637	0.976429
16660736	PNRC2	proline-rich nuclear receptor coactivator 2	0.268403	1.20447	0.00117259	0.00390824
16660745	MYOM3		0.0610983	1.04326	0.46739	0.627426
16660749	MYOM3		-0.0155367	-1.01083	0.820549	0.896981
16660753	LOC284632	uncharacterized LOC284632	-0.177987	-1.1313	0.0255812	0.0623557
16660757	GRHL3	grainyhead-like transcription factor 3	-0.196703	-1.14608	0.0535788	0.117216
16660785	NIPAL3	NIPA-like domain containing 3	0.126545	1.09168	0.071084	0.148717
16660810	RCAN3	RCAN family member 3	0.04452	1.03134	0.583126	0.7274
16660822	NCMAP	noncompact myelin associated protein	0.00831	1.00578	0.931025	0.961686
16660828	SRRM1	serine/arginine repetitive matrix 1	-0.120483	-1.0871	0.0166299	0.0428294
16660863	CLIC4	chloride intracellular channel 4	0.0211217	1.01475	0.735236	0.839895
16660882	MIR4425	microRNA 4425	-0.0355867	-1.02497	0.639604	0.770966
16660891	RHD	Rh blood group, D antigen	-0.0591233	-1.04183	0.44441	0.607639
16660906	TMEM50A	transmembrane protein 50A	-0.161203	-1.11822	0.0342517	0.0803177
16660919	TMEM57	transmembrane protein 57	-0.334178	-1.26066	2.2832e-06	1.24215e-05
16660933	LDLRAP1	low density lipoprotein receptor adaptor protein 1	0.138798	1.10099	0.0402347	0.0921005
16660950	LDLRAP1	low density lipoprotein receptor adaptor protein 1	0.124395	1.09005	0.0688535	0.144766
16660953	MAN1C1	mannosidase, alpha, class 1C, member 1	0.422922	1.34064	1.08386e-06	6.2504e-06
16660976	SEPN1	selenoprotein N, 1	0.09566	1.06855	0.115794	0.221699
16660992	MTFR1L	mitochondrial fission regulator 1-like	0.107867	1.07763	0.201421	0.342311
16661031	EXTL1	exostosin-like glycosyltransferase 1	0.07404	1.05266	0.303208	0.465432
16661051	PDIK1L	PDLIM1 interacting kinase 1 like	-0.334503	-1.26094	1.45173e-05	6.8859e-05
16661058	FAM110D	family with sequence similarity 110, member D	-0.0382817	-1.02689	0.576395	0.722026
16661063	ZNF593	zinc finger protein 593	0.235547	1.17735	0.00319468	0.00968382
16661071	CNKSR1	connector enhancer of kinase suppressor of Ras 1	-0.0445333	-1.03135	0.602636	0.742095
16661102	CATSPER4	cation channel, sperm associated 4	-0.0416233	-1.02927	0.594224	0.735592
16661117	CEP85	centrosomal protein 85kDa	-0.12731	-1.09226	0.0469867	0.105047
16661141	SH3BGRL3	SH3 domain binding glutamate-rich protein like 3	-0.651323	-1.57061	1.3708e-09	1.34716e-08
16661149	CD52	CD52 molecule	-0.424585	-1.34219	6.62706e-06	3.3294e-05
16661155	LIN28A	lin-28 homolog A (C. elegans)	-0.04367	-1.03073	0.597046	0.738009
16661164	DHDDS	dehydrodolichyl diphosphate synthase subunit	-0.243145	-1.18357	0.000724884	0.00251243
16661192	HMGN2	high mobility group nucleosomal binding domain 2	0.187772	1.139	0.0932771	0.186348
16661206	RPS6KA1	ribosomal protein S6 kinase, 90kDa, polypeptide 1	0.219582	1.1644	0.000828489	0.00284046
16661253	MIR1976	microRNA 1976	0.143702	1.10474	0.189403	0.327187
16661255	ARID1A	AT rich interactive domain 1A (SWI-like)	0.147412	1.10758	0.0448396	0.100959
16661284	PIGV	phosphatidylinositol glycan anchor biosynthesis, class V	-0.0896733	-1.06413	0.314769	0.477773
16661298	ZDHHC18	zinc finger, DHHC-type containing 18	-0.404692	-1.32381	1.88895e-05	8.7808e-05
16661314	SFN	stratifin	0.05168	1.03647	0.440556	0.604385
16661323	NUDC	nudC nuclear distribution protein	0.0355283	1.02493	0.551132	0.70096
16661342	TRNP1	TMF1-regulated nuclear protein 1	0.0299	1.02094	0.685351	0.803992
16661347	LOC101928391	uncharacterized LOC101928391	-0.01676	-1.01168	0.820805	0.897162
16661351	WDTC1	WD and tetratricopeptide repeats 1	0.116205	1.08388	0.0830443	0.169519
16661377	TMEM222	transmembrane protein 222	-0.0238783	-1.01669	0.762821	0.858673
16661396	ACTG1P20	actin gamma 1 pseudogene 20	-0.0709633	-1.05042	0.512944	0.668233
16661398	SYTL1	synaptotagmin-like 1	0.349603	1.27421	0.000289211	0.00108017
16661429	GPR3	G protein-coupled receptor 3	0.68005	1.6022	4.16886e-08	3.10161e-07
16661443	FAM76A	family with sequence similarity 76, member A	-0.152703	-1.11165	0.109516	0.212091
16661459	STX12	syntaxin 12	0.215897	1.16143	0.00936053	0.0257231
16661477	PPP1R8	protein phosphatase 1, regulatory subunit 8	-0.0705483	-1.05012	0.30373	0.465979
16661495	SCARNA1	small Cajal body-specific RNA 1	-0.0402967	-1.02833	0.765528	0.860674
16661497	THEMIS2	thymocyte selection associated family member 2	-1.05226	-2.07378	3.28219e-11	4.38956e-10
16661508	SMPDL3B	sphingomyelin phosphodiesterase, acid-like 3B	-0.127002	-1.09202	0.0836238	0.170457
16661527	XKR8	XK, Kell blood group complex subunit-related family, member 8	-0.328572	-1.25577	0.000188287	0.000728717
16661533	ATPIF1	ATPase inhibitory factor 1	-0.113543	-1.08188	0.0845144	0.171884
16661544	SESN2	sestrin 2	1.43893	2.7112	2.35456e-14	5.70398e-13
16661556	MED18	mediator complex subunit 18	0.0432733	1.03045	0.550591	0.700481
16661567	PHACTR4	phosphatase and actin regulator 4	-0.277767	-1.21232	0.000786272	0.002706
16661589	RCC1	regulator of chromosome condensation 1	0.624735	1.54193	1.2587e-09	1.24562e-08
16661617	TRNAU1AP	tRNA selenocysteine 1 associated protein 1	-0.176488	-1.13013	0.015637	0.0405621
16661636	RAB42	RAB42, member RAS oncogene family	0.269067	1.20503	0.00276755	0.00852173
16661646	RNU11	RNA, U11 small nuclear	-0.635533	-1.55351	1.96435e-09	1.8687e-08
16661648	GMEB1	glucocorticoid modulatory element binding protein 1	0.267357	1.2036	0.00112264	0.00375859
16661663	YTHDF2	YTH N(6)-methyladenosine RNA binding protein 2	0.00740833	1.00515	0.899719	0.944789
16661676	OPRD1	opioid receptor, delta 1	-0.115195	-1.08312	0.190543	0.328663
16661687	EPB41	erythrocyte membrane protein band 4.1	-0.230805	-1.17349	0.00584121	0.0167841
16661730	PTPRU	protein tyrosine phosphatase, receptor type, U	-0.568612	-1.4831	5.03866e-08	3.69704e-07
16661792	MATN1-AS1	MATN1 antisense RNA 1	-0.113918	-1.08216	0.121657	0.230868
16661808	LOC400748	uncharacterized LOC400748	0.0635767	1.04505	0.441977	0.605705
16661817	ZCCHC17	zinc finger, CCHC domain containing 17	0.0271233	1.01898	0.719616	0.828614
16661832	SERINC2	serine incorporator 2	0.75861	1.69186	2.3297e-11	3.20195e-10
16661852	LINC01225	long intergenic non-protein coding RNA 1225	0.135133	1.09819	0.0683725	0.143948
16661856	LINC01226	long intergenic non-protein coding RNA 1226	-0.119107	-1.08606	0.235755	0.385829
16661862	TINAGL1	tubulointerstitial nephritis antigen-like 1	-0.06661	-1.04725	0.286475	0.446367
16661890	HCRTR1	hypocretin (orexin) receptor 1	0.0573117	1.04053	0.47978	0.638757
16661917	KHDRBS1	KH domain containing, RNA binding, signal transduction associated 1	-0.235472	-1.17729	0.000340045	0.00125493
16661934	TMEM39B	transmembrane protein 39B	-0.133283	-1.09679	0.147444	0.268726
16661956	KPNA6	karyopherin alpha 6 (importin alpha 7)	-0.224428	-1.16831	0.000496814	0.00178077
16661978	TXLNA	taxilin alpha	-0.339573	-1.26538	2.97265e-05	0.00013372
16661995	CCDC28B	coiled-coil domain containing 28B	-0.609583	-1.52582	3.5455e-08	2.67118e-07
16662009	IQCC	IQ motif containing C	0.524607	1.43854	4.9805e-06	2.56001e-05
16662018	DCDC2B	doublecortin domain containing 2B	-0.032645	-1.02289	0.760945	0.857657
16662031	EIF3I	eukaryotic translation initiation factor 3, subunit I	0.128662	1.09328	0.0341487	0.0800951
16662047	FAM167B	family with sequence similarity 167, member B	0.0469083	1.03305	0.54966	0.699566
16662052	LCK	LCK proto-oncogene, Src family tyrosine kinase	0.162218	1.11901	0.0466784	0.104483
16662077	HDAC1	histone deacetylase 1	0.0453733	1.03195	0.498865	0.656045
16662105	TSSK3	testis-specific serine kinase 3	-0.93354	-1.90996	1.34032e-07	9.03972e-07
16662108	TSSK3	testis-specific serine kinase 3	-0.223298	-1.1674	0.00523618	0.0151921
16662113	ZBTB8B	zinc finger and BTB domain containing 8B	0.025245	1.01765	0.835973	0.906954
16662123	ZBTB8A	zinc finger and BTB domain containing 8A	-2.028	-4.07839	3.4306e-16	1.20544e-14
16662134	RBBP4	retinoblastoma binding protein 4	-0.138112	-1.10046	0.0342906	0.0803836
16662159	KIAA1522	KIAA1522	-0.160232	-1.11747	0.0197283	0.0497246
16662171	S100PBP	S100P binding protein	-0.172475	-1.12699	0.0401458	0.0919606
16662193	HPCA		0.0776917	1.05533	0.323628	0.48688
16662209	AZIN2	antizyme inhibitor 2	0.198478	1.14749	0.00295319	0.00902061
16662234	ZNF362	zinc finger protein 362	-0.408633	-1.32743	5.34981e-05	0.000228969
16662251	LOC101929464	uncharacterized LOC101929464	-0.00801667	-1.00557	0.934312	0.963815
16662255	ZSCAN20	zinc finger and SCAN domain containing 20	0.490737	1.40516	2.61424e-06	1.40683e-05
16662270	HMGB4	high mobility group box 4	0.0403133	1.02834	0.569288	0.716195
16662280	HMGB4	high mobility group box 4	0.109353	1.07874	0.244268	0.396365
16662282	CSMD2-AS1	CSMD2 antisense RNA 1	-0.068365	-1.04853	0.380928	0.547356
16662296	RN5S42		0.155537	1.11384	0.137432	0.254037
16662298	C1orf94	chromosome 1 open reading frame 94	0.00730333	1.00508	0.926226	0.958668
16662313	GJB5	gap junction protein, beta 5, 31.1kDa	0.12422	1.08992	0.150349	0.272825
16662317	GJB4	gap junction protein, beta 4, 30.3kDa	0.102805	1.07386	0.318143	0.481252
16662322	GJB3	gap junction protein, beta 3, 31kDa	-0.0144383	-1.01006	0.884519	0.936304
16662329	GJA4	gap junction protein, alpha 4, 37kDa	0.0493683	1.03481	0.536945	0.688677
16662338	ZMYM1	zinc finger, MYM-type 1	-0.452172	-1.3681	2.99682e-06	1.59773e-05
16662359	ZMYM4	zinc finger, MYM-type 4	-0.0318183	-1.0223	0.62773	0.761531
16662396	NCDN	neurochondrin	-0.480323	-1.39506	2.42352e-06	1.31202e-05
16662412	TFAP2E	transcription factor AP-2 epsilon (activating enhancer binding protein 2 epsilon)	-0.192417	-1.14268	0.0203976	0.0511518
16662430	AGO4	argonaute RISC catalytic component 4	0.609233	1.52545	1.59351e-07	1.06271e-06
16662453	AGO1	argonaute RISC catalytic component 1	-0.0656133	-1.04653	0.310177	0.472852
16662475	AGO3	argonaute RISC catalytic component 3	-0.181235	-1.13385	0.067369	0.142096
16662510	TEKT2	tektin 2 (testicular)	-0.0776567	-1.0553	0.226792	0.374623
16662525	ADPRHL2	ADP-ribosylhydrolase like 2	-0.0705583	-1.05012	0.483447	0.642091
16662537	MAP7D1	MAP7 domain containing 1	-0.0505983	-1.03569	0.458539	0.61995
16662566	THRAP3	thyroid hormone receptor associated protein 3	-0.166595	-1.12241	0.0285648	0.0685799
16662584	SH3D21	SH3 domain containing 21	-0.210645	-1.15721	0.0243684	0.0597372
16662619	MIR4255	microRNA 4255	-0.018075	-1.01261	0.841343	0.910592
16662623	ZC3H12A		-0.292953	-1.22515	0.000472994	0.00170235
16662636	DNALI1	dynein, axonemal, light intermediate chain 1	0.249752	1.189	0.000760504	0.00262459
16662648	CDCA8	cell division cycle associated 8	-0.487628	-1.40214	2.04422e-07	1.33871e-06
16662664	MANEAL	mannosidase, endo-alpha-like	-1.57201	-2.97318	1.02641e-19	8.13402e-18
16662676	C1orf122	chromosome 1 open reading frame 122	-0.151745	-1.11091	0.0255847	0.0623557
16662685	INPP5B	inositol polyphosphate-5-phosphatase B	-0.478952	-1.39373	0.000132616	0.000528899
16662692	UTP11L	UTP11-like, U3 small nucleolar ribonucleoprotein (yeast)	-0.321323	-1.24948	5.08409e-06	2.60876e-05
16662710	MIR3659	microRNA 3659	0.166158	1.12207	0.0157225	0.0407625
16662737	AKIRIN1	akirin 1	0.058365	1.04129	0.360676	0.526998
16662744	NDUFS5		0.0608417	1.04307	0.491918	0.649979
16662755	MACF1	microtubule-actin crosslinking factor 1	-0.882757	-1.8439	3.40869e-10	3.72592e-09
16662885	KIAA0754	KIAA0754	0.175217	1.12913	0.125613	0.236623
16662890	BMP8A	bone morphogenetic protein 8a	0.164742	1.12097	0.175305	0.307804
16662900	LOC100506950		-0.234163	-1.17622	0.0159245	0.0412146
16662908	PPIE	peptidylprolyl isomerase E (cyclophilin E)	0.421145	1.33899	1.63592e-06	9.15578e-06
16662945	MFSD2A	major facilitator superfamily domain containing 2A	0.490028	1.40447	5.65849e-07	3.44234e-06
16662968	CAP1	CAP, adenylate cyclase-associated protein 1 (yeast)	0.369292	1.29172	1.64787e-06	9.21576e-06
16662993	RLF	rearranged L-myc fusion	-0.246508	-1.18633	0.000467452	0.00168485
16663007	TMCO2	transmembrane and coiled-coil domains 2	-0.0755133	-1.05374	0.39498	0.561814
16663014	ZMPSTE24	zinc metallopeptidase STE24	-0.226842	-1.17027	0.00343583	0.0103569
16663033	SMAP2	small ArfGAP2	0.027885	1.01952	0.613721	0.750669
16663051	ZFP69B	ZFP69 zinc finger protein B	-0.275803	-1.21067	0.0325781	0.0769078
16663064	ZFP69	ZFP69 zinc finger protein	-1.09778	-2.14025	2.93447e-12	4.80431e-11
16663075	EXO5	exonuclease 5	-0.648158	-1.56717	1.20606e-09	1.1983e-08
16663085	ZNF684	zinc finger protein 684	0.170808	1.12569	0.0578816	0.125069
16663094	NFYC		-0.0237733	-1.01661	0.741364	0.844258
16663129	MIR30E	microRNA 30e	0.0871983	1.06231	0.393904	0.560916
16663131	MIR30C1	microRNA 30c-1	0.119757	1.08655	0.186653	0.323561
16663133	KCNQ4	potassium channel, voltage gated KQT-like subfamily Q, member 4	0.29624	1.22794	0.00137718	0.00452037
16663155	CTPS1	CTP synthase 1	-0.0623633	-1.04417	0.373403	0.540112
16663188	SLFNL1-AS1	SLFNL1 antisense RNA 1	0.00233833	1.00162	0.978173	0.988267
16663193	LOC102723924	uncharacterized LOC102723924	-0.531012	-1.44494	0.000954718	0.00323527
16663199	FOXO6	forkhead box O6	-0.485758	-1.40032	1.77635e-06	9.86576e-06
16663218	GUCA2B	guanylate cyclase activator 2B (uroguanylin)	-0.456812	-1.37251	8.31508e-06	4.10886e-05
16663223	RIMKLA	ribosomal modification protein rimK-like family member A	0.160203	1.11744	0.180435	0.314908
16663231	PPCS	phosphopantothenoylcysteine synthetase	-0.02268	-1.01584	0.765372	0.860563
16663242	CCDC30	coiled-coil domain containing 30	-0.260702	-1.19806	0.00589408	0.0169164
16663282	CCDC30	coiled-coil domain containing 30	-0.500842	-1.41504	0.000106388	0.000431358
16663284	CCDC30	coiled-coil domain containing 30	-0.242367	-1.18293	0.0778691	0.160405
16663286	CCDC30	coiled-coil domain containing 30	-0.357347	-1.28107	0.00392049	0.011676
16663288	CCDC30	coiled-coil domain containing 30	-0.0732217	-1.05206	0.334519	0.498591
16663291	CCDC30	coiled-coil domain containing 30	-0.848555	-1.8007	5.97121e-09	5.20261e-08
16663294	PPIH	peptidylprolyl isomerase H (cyclophilin H)	0.073105	1.05198	0.320151	0.483284
16663314	PPIH	peptidylprolyl isomerase H (cyclophilin H)	0.0307133	1.02152	0.740683	0.843846
16663317	YBX1	Y box binding protein 1	-0.258033	-1.19585	0.00094308	0.00319947
16663332	C1orf50		-0.29011	-1.22273	0.000218923	0.000837279
16663345	LOC100129924		-0.339557	-1.26537	0.0141403	0.0370798
16663347	LOC100129924		-0.278167	-1.21265	0.00493963	0.0144046
16663358	ERMAP	erythroblast membrane-associated protein (Scianna blood group)	-0.140688	-1.10243	0.0975543	0.193363
16663376	ZNF691	zinc finger protein 691	-0.108385	-1.07802	0.382769	0.549233
16663390	SLC2A1-AS1	SLC2A1 antisense RNA 1	0.0808367	1.05763	0.454807	0.616596
16663398	FAM183A		0.0255	1.01783	0.687953	0.805871
16663413	CFAP57	cilia and flagella associated protein 57	-0.0901717	-1.0645	0.26203	0.417345
16663446	RN5S46		0.0856117	1.06114	0.45494	0.616658
16663448	TMEM125	transmembrane protein 125	0.0122617	1.00854	0.860526	0.92138
16663457	TIE1	tyrosine kinase with immunoglobulin-like and EGF-like domains 1	-0.1452	-1.10588	0.0412396	0.0940252
16663498	MPL	MPL proto-oncogene, thrombopoietin receptor	-0.0365417	-1.02565	0.557256	0.706007
16663514	CDC20	cell division cycle 20	-0.0745383	-1.05302	0.210259	0.353281
16663537	SZT2	seizure threshold 2 homolog (mouse)	-0.186487	-1.13799	0.0316423	0.074948
16663621	PTPRF	protein tyrosine phosphatase, receptor type, F	0.261027	1.19833	0.00102545	0.00346117
16663665	KDM4A	lysine (K)-specific demethylase 4A	-0.08989	-1.06429	0.163218	0.290925
16663694	ST3GAL3	ST3 beta-galactoside alpha-2,3-sialyltransferase 3	-0.154917	-1.11336	0.0956761	0.190273
16663730	ARTN	artemin	0.326315	1.25381	7.4335e-05	0.000309438
16663743	IPO13	importin 13	-0.609068	-1.52527	1.17588e-08	9.75707e-08
16663773	DPH2	DPH2 homolog	0.606477	1.52254	1.69684e-07	1.12834e-06
16663792	ATP6V0B	ATPase, H+ transporting, lysosomal 21kDa, V0 subunit b	0.334953	1.26134	1.15862e-05	5.58451e-05
16663812	B4GALT2	UDP-Gal:betaGlcNAc beta 1,4- galactosyltransferase, polypeptide 2	0.460898	1.3764	7.86127e-08	5.54945e-07
16663828	CCDC24	coiled-coil domain containing 24	-0.184393	-1.13634	0.0091489	0.0251787
16663851	KLF17	Kruppel-like factor 17	-0.012095	-1.00842	0.875009	0.930434
16663863	KLF17	Kruppel-like factor 17	-0.158627	-1.11622	0.0167965	0.0431626
16663871	DMAP1	DNA methyltransferase 1 associated protein 1	0.000985	1.00068	0.987862	0.993564
16663899	RNF220	ring finger protein 220	-1.02594	-2.03628	1.38341e-12	2.40498e-11
16663931	C1orf228	chromosome 1 open reading frame 228	-1.16908	-2.24869	4.39929e-14	1.01068e-12
16663958	KIF2C	kinesin family member 2C	-0.253472	-1.19207	0.000167341	0.000654537
16663989	SNORD38B		0.210068	1.15674	0.001331	0.00438554
16664003	SNORD46	small nucleolar RNA, C/D box 46	0.1165	1.0841	0.0733615	0.152725
16664005	PLK3	polo-like kinase 3	-0.21901	-1.16393	0.0145597	0.0380224
16664028	BTBD19		-0.107005	-1.07699	0.194733	0.333967
16664046	RN5S47		0.169073	1.12434	0.0638302	0.135795
16664048	UROD	uroporphyrinogen decarboxylase	-0.923465	-1.89667	2.20953e-13	4.47569e-12
16664072	LINC01144	long intergenic non-protein coding RNA 1144	-0.365687	-1.28849	3.08698e-05	0.000138341
16664074	HPDL	4-hydroxyphenylpyruvate dioxygenase-like	1.69291	3.23307	2.67861e-16	9.69802e-15
16664078	TOE1	target of EGR1, member 1 (nuclear)	-0.337435	-1.26351	5.45061e-06	2.78388e-05
16664091	MMACHC	methylmalonic aciduria (cobalamin deficiency) cblC type, with homocystinuria	0.844858	1.79609	2.30871e-10	2.61106e-09
16664100	AKR1A1	aldo-keto reductase family 1, member A1 (aldehyde reductase)	-0.87746	-1.83714	6.44088e-11	8.10469e-10
16664118	NASP	nuclear autoantigenic sperm protein (histone-binding)	0.0126117	1.00878	0.814948	0.894139
16664150	TMEM69	transmembrane protein 69	0.324573	1.25229	5.71777e-05	0.000242938
16664156	MAST2	microtubule associated serine/threonine kinase 2	-0.621655	-1.53864	1.33099e-10	1.57595e-09
16664213	LOC100133124		0.0275917	1.01931	0.685437	0.804031
16664215	LOC101929626	uncharacterized LOC101929626	0.143857	1.10485	0.126332	0.237691
16664218	TSPAN1	tetraspanin 1	-0.0195367	-1.01363	0.727391	0.834575
16664235	LURAP1	leucine rich adaptor protein 1	-0.217835	-1.16299	0.00330884	0.0100004
16664243	RAD54L	RAD54-like (S. cerevisiae)	-0.0593067	-1.04196	0.405555	0.57139
16664272	UQCRHL		0.387267	1.30791	2.03322e-05	9.39285e-05
16664281	NSUN4	NOP2/Sun domain family, member 4	0.0224483	1.01568	0.731778	0.837904
16664299	FAAH	fatty acid amide hydrolase	-0.83543	-1.78439	1.76996e-10	2.04179e-09
16664322	FAAHP1	fatty acid amide hydrolase pseudogene 1	-0.0408783	-1.02874	0.68119	0.801382
16664335	DMBX1	diencephalon/mesencephalon homeobox 1	0.0759017	1.05402	0.435423	0.599369
16664341	MKNK1-AS1	MKNK1 antisense RNA 1	-0.173412	-1.12772	0.0226403	0.0560216
16664350	TEX38	testis expressed 38	0.184548	1.13646	0.0329635	0.0777006
16664354	EFCAB14-AS1	EFCAB14 antisense RNA 1	0.100957	1.07248	0.302654	0.464951
16664359	CYP4B1	cytochrome P450, family 4, subfamily B, polypeptide 1	0.169053	1.12432	0.0341753	0.0801465
16664388	CYP4X1	cytochrome P450, family 4, subfamily X, polypeptide 1	0.0350683	1.02461	0.582925	0.727284
16664406	CYP4Z1	cytochrome P450, family 4, subfamily Z, polypeptide 1	0.166188	1.12209	0.0560118	0.121742
16664421	CYP4A22		0.26196	1.19911	0.0467881	0.104681
16664438	LINC00853	long intergenic non-protein coding RNA 853	-0.0530983	-1.03749	0.666533	0.790916
16664445	CMPK1	cytidine monophosphate (UMP-CMP) kinase 1, cytosolic	-0.230367	-1.17313	0.000299817	0.00111726
16664456	FOXE3	forkhead box E3	-0.106972	-1.07697	0.0655952	0.138905
16664460	FOXD2	forkhead box D2	-0.0859667	-1.0614	0.280212	0.439029
16664473	LOC105378702	uncharacterized LOC105378702	0.0580467	1.04106	0.389817	0.556612
16664486	SLC5A9	solute carrier family 5 (sodium/sugar cotransporter), member 9	0.0230883	1.01613	0.738355	0.84178
16664522	LOC101929721	uncharacterized LOC101929721	0.0108533	1.00755	0.860326	0.921298
16664533	ELAVL4	ELAV like neuron-specific RNA binding protein 4	0.824563	1.771	4.58951e-12	7.19378e-11
16664569	CDKN2C	cyclin-dependent kinase inhibitor 2C (p18, inhibits CDK4)	-0.004085	-1.00284	0.959263	0.977804
16664579	MIR4421	microRNA 4421	0.211	1.15749	0.17374	0.305604
16664581	C1orf185	chromosome 1 open reading frame 185	-0.259343	-1.19693	0.0420329	0.0955688
16664599	RNF11	ring finger protein 11	-0.629042	-1.54654	9.03261e-08	6.31499e-07
16664610	TTC39A-AS1	TTC39A antisense RNA 1	0.0248767	1.01739	0.688331	0.806186
16664624	OSBPL9	oxysterol binding protein-like 9	-0.18291	-1.13517	0.00897984	0.0247683
16664685	RN5S48		0.057655	1.04077	0.381607	0.548119
16664694	BTF3L4	basic transcription factor 3-like 4	0.173043	1.12743	0.0619393	0.132368
16664708	ZFYVE9	zinc finger, FYVE domain containing 9	-0.26366	-1.20052	0.00206095	0.00651912
16664731	PRPF38A	pre-mRNA processing factor 38A	-0.063235	-1.04481	0.216651	0.361777
16664748	GPX7	glutathione peroxidase 7	-0.689913	-1.61319	2.83241e-09	2.61211e-08
16664754	FAM159A	family with sequence similarity 159, member A	-0.06425	-1.04554	0.369232	0.535873
16664765	ZYG11B	zyg-11 family member B, cell cycle regulator	-0.411863	-1.3304	1.59304e-05	7.50952e-05
16664782	ZYG11A	zyg-11 family member A, cell cycle regulator	0.30478	1.23523	8.76091e-05	0.000360316
16664802	SCP2	sterol carrier protein 2	-0.49672	-1.411	4.15141e-09	3.70865e-08
16664828	PODN	podocan	-0.034	-1.02385	0.665235	0.789878
16664852	CPT2	carnitine palmitoyltransferase 2	0.398358	1.31801	2.69363e-05	0.000121942
16664861	LOC100507564	uncharacterized LOC100507564	-0.313955	-1.24311	0.00116184	0.00387544
16664878	LOC105378732	uncharacterized LOC105378732	-1.35258	-2.55369	7.39837e-17	3.03649e-15
16664887	DMRTB1	DMRT-like family B with proline-rich C-terminal, 1	0.0645133	1.04573	0.440082	0.603929
16664897	DIO1	deiodinase, iodothyronine, type I	0.0317633	1.02226	0.728106	0.835065
16664912	LRRC42	leucine rich repeat containing 42	-0.763455	-1.69755	4.71881e-09	4.17354e-08
16664932	TCEANC2	transcription elongation factor A (SII) N-terminal and central domain containing 2	-0.535182	-1.44912	5.09559e-07	3.12479e-06
16664947	MRPL37	mitochondrial ribosomal protein L37	-0.324518	-1.25225	9.93086e-05	0.000404414
16664963	SSBP3-AS1	SSBP3 antisense RNA 1	0.136597	1.09931	0.113712	0.21857
16664967	LOC100653134		-0.119645	-1.08647	0.101765	0.199954
16664978	ACOT11	acyl-CoA thioesterase 11	-0.338737	-1.26465	0.000937192	0.00318058
16665006	HEATR8-TTC4		0.00259667	1.0018	0.967745	0.982695
16665069	LEXM	lymphocyte expansion molecule	-0.0826217	-1.05894	0.294328	0.455329
16665094	TMEM61	transmembrane protein 61	-0.0912267	-1.06528	0.302823	0.465162
16665102	BSND	barttin CLCNK-type chloride channel accessory beta subunit	0.022145	1.01547	0.756552	0.854742
16665109	PCSK9	proprotein convertase subtilisin/kexin type 9	0.0303967	1.02129	0.647085	0.776477
16665132	LOC100507634	uncharacterized LOC100507634	-0.122172	-1.08837	0.0987015	0.19523
16665139	MIR4422	microRNA 4422	0.114038	1.08225	0.127047	0.238794
16665182	PRKAA2	protein kinase, AMP-activated, alpha 2 catalytic subunit	-0.0243333	-1.01701	0.820489	0.896948
16665193	C8A	complement component 8, alpha polypeptide	0.129505	1.09392	0.0718512	0.149969
16665214	LOC105378749	uncharacterized LOC105378749	0.050965	1.03596	0.436333	0.600223
16665224	DAB1-AS1	DAB1 antisense RNA 1	-0.0506517	-1.03573	0.480775	0.639672
16665232	DAB1-AS1	DAB1 antisense RNA 1	0.108417	1.07804	0.0582379	0.125711
16665247	LINC01135	long intergenic non-protein coding RNA 1135	0.0527967	1.03727	0.489772	0.648034
16665254	LINC01358	long intergenic non-protein coding RNA 1358	-0.132473	-1.09617	0.0692446	0.145496
16665266	FGGY	FGGY carbohydrate kinase domain containing	-0.477413	-1.39225	1.80841e-06	1.0014e-05
16665298	LOC101926944	uncharacterized LOC101926944	-0.280898	-1.21495	0.0029479	0.0090063
16665302	HOOK1	hook microtubule-tethering protein 1	0.0941833	1.06746	0.147768	0.269085
16665346	NFIA	nuclear factor I/A	1.00782	2.01087	3.52001e-13	6.88227e-12
16665373	INADL	InaD-like (Drosophila)	-0.925407	-1.89922	1.07279e-14	2.7676e-13
16665437	MIR3116-1		0.215028	1.16073	0.0664769	0.140479
16665439	L1TD1	LINE-1 type transposase domain containing 1	-0.0254117	-1.01777	0.772665	0.865859
16665447	USP1	ubiquitin specific peptidase 1	-0.194113	-1.14402	0.00337207	0.010175
16665461	ANGPTL3	angiopoietin-like 3	0.0517233	1.0365	0.557608	0.706301
16665472	LOC400756	uncharacterized LOC400756	0.179405	1.13242	0.0118401	0.0317638
16665475	ATG4C	autophagy related 4C, cysteine peptidase	0.142642	1.10392	0.0712555	0.148964
16665507	FOXD3	forkhead box D3	-0.02521	-1.01763	0.823011	0.898375
16665512	ALG6	ALG6, alpha-1,3-glucosyltransferase	-0.203478	-1.15147	0.0102963	0.0280054
16665536	EFCAB7	EF-hand calcium binding domain 7	-0.255865	-1.19405	0.010768	0.0291764
16665558	DLEU2L	deleted in lymphocytic leukemia 2-like	-0.354753	-1.27877	0.0298607	0.071352
16665566	PGM1	phosphoglucomutase 1	-1.13734	-2.19975	3.22034e-15	9.14742e-14
16665588	ROR1	receptor tyrosine kinase-like orphan receptor 1	-0.756012	-1.68882	9.51246e-11	1.1588e-09
16665606	UBE2U	ubiquitin-conjugating enzyme E2U (putative)	-0.0456833	-1.03217	0.593054	0.734954
16665621	CACHD1	cache domain containing 1	1.43039	2.6952	1.0208e-14	2.64954e-13
16665654	MIR4794	microRNA 4794	-0.00245833	-1.00171	0.963496	0.98014
16665656	RAVER2	ribonucleoprotein, PTB-binding 2	0.21596	1.16148	0.00585009	0.0168063
16665674	AK4	adenylate kinase 4	-1.05401	-2.07629	9.8825e-13	1.76752e-11
16665687	DNAJC6	DnaJ (Hsp40) homolog, subfamily C, member 6	-1.51655	-2.86106	1.22652e-16	4.82144e-15
16665717	LEPR		-0.362465	-1.28562	5.91883e-05	0.00025098
16665757	PDE4B	phosphodiesterase 4B, cAMP-specific	-0.340048	-1.2658	2.70429e-05	0.000122382
16665796	SGIP1	SH3-domain GRB2-like (endophilin) interacting protein 1	-0.01512	-1.01054	0.816077	0.894816
16665833	MIR3117	microRNA 3117	0.06376	1.04519	0.483611	0.642135
16665835	TCTEX1D1	Tctex1 domain containing 1	-2.18073	-4.53382	5.5975e-20	4.80659e-18
16665853	MIER1	mesoderm induction early response 1, transcriptional regulator	0.184608	1.13651	0.00217813	0.00686211
16665878	IL23R	interleukin 23 receptor	1.14925	2.21798	8.55652e-15	2.24831e-13
16665901	IL12RB2	interleukin 12 receptor, beta 2	0.225548	1.16922	0.00180079	0.00577094
16665932	GADD45A	growth arrest and DNA-damage-inducible, alpha	-0.137492	-1.09999	0.0362864	0.0843389
16665941	GNG12-AS1	GNG12 antisense RNA 1	-0.00191833	-1.00133	0.981065	0.989849
16665963	DEPDC1-AS1	DEPDC1 antisense RNA 1	0.0320417	1.02246	0.720589	0.829387
16665976	LRRC7	leucine rich repeat containing 7	-0.05335	-1.03767	0.40044	0.567107
16666007	PIN1P1	peptidylprolyl cis/trans isomerase, NIMA-interacting 1 pseudogene 1	0.072285	1.05138	0.414092	0.579744
16666009	LRRC7	leucine rich repeat containing 7	-0.0411583	-1.02894	0.584339	0.728425
16666013	SRSF11	serine/arginine-rich splicing factor 11	-0.371892	-1.29405	6.9806e-06	3.49171e-05
16666045	HHLA3	HERV-H LTR-associating 3	-0.69901	-1.62339	2.06224e-07	1.34904e-06
16666055	CTH	cystathionine gamma-lyase	-0.194312	-1.14418	0.0438625	0.099103
16666071	LOC101927244	uncharacterized LOC101927244	0.229135	1.17213	0.0313237	0.0742878
16666086	ZRANB2-AS1	ZRANB2 antisense RNA 1	-0.042865	-1.03016	0.528014	0.681259
16666091	ZRANB2-AS2	ZRANB2 antisense RNA 2 (head to head)	0.223705	1.16773	0.00288998	0.00885296
16666105	ZRANB2-AS2	ZRANB2 antisense RNA 2 (head to head)	0.00203667	1.00141	0.979901	0.989263
16666115	LOC339468	uncharacterized LOC339468	0.132793	1.09641	0.0940268	0.187494
16666126	LINC01360	long intergenic non-protein coding RNA 1360	0.0192917	1.01346	0.81396	0.893482
16666143	FPGT-TNNI3K		0.153512	1.11227	0.0120249	0.0322103
16666200	ERICH3-AS1	ERICH3 antisense RNA 1	0.157895	1.11566	0.0523021	0.114908
16666204	TYW3	tRNA-yW synthesizing protein 3 homolog (S. cerevisiae)	0.212608	1.15878	0.00307565	0.00935441
16666224	LHX8	LIM homeobox 8	-1.08425	-2.12027	3.12797e-14	7.38544e-13
16666239	ACADM	acyl-CoA dehydrogenase, C-4 to C-12 straight chain	0.184368	1.13632	0.0136887	0.0360289
16666266	ACADM	acyl-CoA dehydrogenase, C-4 to C-12 straight chain	-0.056595	-1.04001	0.445702	0.608614
16666268	RABGGTB		0.538172	1.45213	3.56494e-09	3.21503e-08
16666296	MSH4	mutS homolog 4	-0.103018	-1.07402	0.102341	0.200873
16666319	LOC101927342	uncharacterized LOC101927342	-0.0334567	-1.02346	0.617124	0.753033
16666326	ST6GALNAC3	ST6 (alpha-N-acetyl-neuraminyl-2,3-beta-galactosyl-1,3)-N-acetylgalactosaminide alpha-2,6-sialyltransferase 3	-2.2138	-4.63896	1.30309e-20	1.3162e-18
16666336	ST6GALNAC5	ST6 (alpha-N-acetyl-neuraminyl-2,3-beta-galactosyl-1,3)-N-acetylgalactosaminide alpha-2,6-sialyltransferase 5	0.10105	1.07255	0.108836	0.210899
16666357	AK5	adenylate kinase 5	-0.196637	-1.14602	0.00787847	0.0220118
16666390	RN5S20		0.276325	1.21111	0.00274831	0.00846687
16666392	FAM73A	family with sequence similarity 73, member A	-0.306972	-1.23711	0.00217473	0.00685213
16666416	NEXN	nexilin (F actin binding protein)	0.0607867	1.04303	0.37761	0.543996
16666437	DNAJB4	DnaJ (Hsp40) homolog, subfamily B, member 4	-0.016425	-1.01145	0.872539	0.929101
16666448	GIPC2	GIPC PDZ domain containing family, member 2	0.107087	1.07705	0.245664	0.398045
16666458	MGC27382	uncharacterized MGC27382	-0.112543	-1.08113	0.109762	0.212472
16666471	PTGFR	prostaglandin F receptor (FP)	-0.0925533	-1.06626	0.189337	0.327111
16666485	IFI44L	interferon-induced protein 44-like	-1.84715	-3.59787	3.11756e-20	2.89389e-18
16666509	IFI44	interferon-induced protein 44	-2.33201	-5.03506	3.80764e-20	3.4071e-18
16666537	LOC101927412	uncharacterized LOC101927412	0.011395	1.00793	0.893908	0.941493
16666545	ADGRL2	adhesion G protein-coupled receptor L2	0.475957	1.39084	6.10731e-08	4.41055e-07
16666590	LINC01362	long intergenic non-protein coding RNA 1362	0.128835	1.09341	0.0603441	0.129482
16666603	LOC101927542	uncharacterized LOC101927542	0.04819	1.03397	0.601076	0.741196
16666616	PRKACB	protein kinase, cAMP-dependent, catalytic, beta	-0.118973	-1.08596	0.0844347	0.171757
16666640	SAMD13	sterile alpha motif domain containing 13	0.431962	1.34907	3.92084e-06	2.04784e-05
16666657	DNASE2B	deoxyribonuclease II beta	0.0671983	1.04768	0.498695	0.655949
16666668	RPF1	ribosome production factor 1 homolog	0.183987	1.13602	0.0125375	0.0333851
16666681	SPATA1	spermatogenesis associated 1	-0.272683	-1.20805	0.000207408	0.000797026
16666694	WDR63	WD repeat domain 63	0.360163	1.28357	6.84706e-05	0.00028695
16666723	MIR4423	microRNA 4423	-0.0450783	-1.03174	0.553909	0.7034
16666730	LOC646626	uncharacterized LOC646626	0.0298283	1.02089	0.658265	0.784477
16666738	CYR61	cysteine-rich, angiogenic inducer, 61	0.37905	1.30049	4.63235e-06	2.39262e-05
16666755	CLCA2	chloride channel accessory 2	0.016395	1.01143	0.781708	0.871401
16666775	CLCA1	chloride channel accessory 1	0.06472	1.04588	0.37877	0.545123
16666799	CLCA4	chloride channel accessory 4	0.0307483	1.02154	0.631455	0.764253
16666819	CLCA3P	chloride channel accessory 3, pseudogene	0.0924283	1.06616	0.258778	0.413692
16666835	SH3GLB1	SH3-domain GRB2-like endophilin B1	-0.943295	-1.92292	5.33634e-13	1.00637e-11
16666851	HS2ST1	heparan sulfate 2-O-sulfotransferase 1	-0.486023	-1.40058	1.00577e-06	5.8374e-06
16666862	LOC339524		0.09273	1.06639	0.247625	0.400373
16666865	LINC01140	long intergenic non-protein coding RNA 1140	-0.73524	-1.66467	4.4768e-09	3.9772e-08
16666881	LMO4	LIM domain only 4	0.890777	1.85417	3.20699e-10	3.52485e-09
16666890	LOC101927871	uncharacterized LOC101927871	0.136565	1.09928	0.114198	0.219194
16666896	PKN2	protein kinase N2	-0.048225	-1.03399	0.517108	0.671777
16666943	GBP6	guanylate binding protein family, member 6	-0.0721067	-1.05125	0.471639	0.631416
16666959	GBP1P1	guanylate binding protein 1, interferon-inducible pseudogene 1	-0.56876	-1.48325	2.15182e-05	9.8947e-05
16666965	LRRC8B	leucine rich repeat containing 8 family, member B	0.495142	1.40946	2.86981e-06	1.53384e-05
16666982	LRRC8C	leucine rich repeat containing 8 family, member C	0.564433	1.47881	7.85102e-06	3.8944e-05
16666997	LOC101927975	uncharacterized LOC101927975	0.0272717	1.01908	0.772687	0.865859
16667000	LRRC8D	leucine rich repeat containing 8 family, member D	0.556645	1.47084	9.77984e-06	4.77252e-05
16667011	ZNF326	zinc finger protein 326	-0.0272917	-1.0191	0.692689	0.809413
16667037	CDC7	cell division cycle 7	-0.1151	-1.08305	0.0566778	0.122913
16667056	HSP90B3P	heat shock protein 90kDa beta (Grp94), member 3, pseudogene	0.225743	1.16938	0.022196	0.0550733
16667060	BRDT	bromodomain, testis-specific	0.119147	1.08609	0.0503827	0.111286
16667094	EPHX4	epoxide hydrolase 4	0.361197	1.28449	6.44913e-05	0.00027166
16667105	BTBD8	BTB (POZ) domain containing 8	0.38047	1.30177	0.000550263	0.00195356
16667119	KIAA1107	KIAA1107	0.206858	1.15417	0.0129989	0.0344354
16667130	C1orf146	chromosome 1 open reading frame 146	0.160153	1.11741	0.052989	0.116165
16667140	RPAP2	RNA polymerase II associated protein 2	0.268288	1.20438	0.000149718	0.000591273
16667155	RPL5		0.326783	1.25421	2.39633e-06	1.29824e-05
16667175	SNORA66		0.398937	1.31854	0.00974287	0.0266557
16667183	MTF2	metal response element binding transcription factor 2	-0.0213083	-1.01488	0.680814	0.801133
16667206	CCDC18	coiled-coil domain containing 18	0.329955	1.25697	5.59318e-05	0.000238185
16667247	DR1	down-regulator of transcription 1	0.0676967	1.04804	0.274897	0.433002
16667258	FNBP1L	formin binding protein 1-like	1.07238	2.10289	1.96651e-11	2.74069e-10
16667277	LOC100129046	uncharacterized LOC100129046	0.0780717	1.05561	0.253407	0.407401
16667286	MIR760	microRNA 760	-0.046175	-1.03252	0.662496	0.787748
16667303	ABCD3	ATP-binding cassette, sub-family D (ALD), member 3	-0.463455	-1.37884	3.00244e-07	1.91162e-06
16667346	SLC44A3	solute carrier family 44, member 3	-0.222668	-1.16689	0.0076805	0.0214969
16667368	LOC729970	hCG2028352-like	-0.0226833	-1.01585	0.756045	0.854331
16667379	LOC101928098	uncharacterized LOC101928098	0.0818233	1.05835	0.304706	0.466852
16667385	RWDD3		0.00655	1.00455	0.918505	0.954711
16667422	FLJ31662	uncharacterized LOC440594	0.0799133	1.05695	0.456866	0.618277
16667427	LOC100996635	uncharacterized LOC100996635	-0.100083	-1.07184	0.274257	0.432176
16667440	LOC102723661	uncharacterized LOC102723661	-0.130008	-1.0943	0.121111	0.230003
16667456	PTBP2	polypyrimidine tract binding protein 2	0.230508	1.17325	0.0416178	0.0947571
16667481	DPYD-AS1	DPYD antisense RNA 1	-0.456182	-1.37191	2.13102e-06	1.16703e-05
16667487	DPYD-AS2	DPYD antisense RNA 2	-0.06639	-1.04709	0.441212	0.604981
16667492	LOC729987	uncharacterized LOC729987	0.0260733	1.01824	0.822572	0.898171
16667498	SNX7	sorting nexin 7	0.00243833	1.00169	0.968116	0.982867
16667512	LOC100129620	uncharacterized LOC100129620	-0.103595	-1.07445	0.205098	0.346977
16667516	LPPR4	lipid phosphate phosphatase-related protein type 4	0.00165333	1.00115	0.984564	0.991789
16667530	PALMD	palmdelphin	0.04737	1.03338	0.559948	0.708406
16667546	AGL	amylo-alpha-1, 6-glucosidase, 4-alpha-glucanotransferase	0.325737	1.2533	0.000205104	0.000788738
16667590	SLC35A3	solute carrier family 35 (UDP-N-acetylglucosamine (UDP-GlcNAc) transporter), member A3	0.318715	1.24722	1.08901e-05	5.27289e-05
16667608	HIAT1	hippocampus abundant transcript 1	0.201982	1.15028	0.00846009	0.0234716
16667625	TRMT13	tRNA methyltransferase 13 homolog (S. cerevisiae)	0.276228	1.21102	0.00011172	0.000451013
16667644	RTCA	RNA 3'-terminal phosphate cyclase	0.515383	1.42937	3.36458e-09	3.05468e-08
16667660	MIR553	microRNA 553	0.693242	1.61691	0.000107596	0.00043596
16667662	CDC14A	cell division cycle 14A	0.710888	1.63681	8.33498e-11	1.02627e-09
16667694	GPR88	G protein-coupled receptor 88	0.228897	1.17194	0.00291704	0.00892486
16667702	VCAM1	vascular cell adhesion molecule 1	-0.028285	-1.0198	0.637575	0.769395
16667715	SLC30A7	solute carrier family 30 (zinc transporter), member 7	0.0294717	1.02064	0.582526	0.727153
16667733	SLC30A7	solute carrier family 30 (zinc transporter), member 7	0.50334	1.41749	0.000260152	0.000980613
16667736	LOC102606465	uncharacterized LOC102606465	-0.19371	-1.1437	0.0184374	0.0468475
16667752	LOC101928334	uncharacterized LOC101928334	-0.13535	-1.09836	0.0560355	0.121777
16667760	S1PR1	sphingosine-1-phosphate receptor 1	0.00371167	1.00258	0.960251	0.978325
16667783	DNAJA1P5	DnaJ (Hsp40) homolog, subfamily A, member 1 pseudogene 5	-0.0711317	-1.05054	0.547578	0.697717
16667801	RNPC3	RNA-binding region (RNP1, RRM) containing 3	0.417027	1.33517	8.20994e-07	4.83271e-06
16667830	AMY2B		0.214258	1.16011	0.0271216	0.0655481
16667850	AMY2A	amylase, alpha 2A (pancreatic)	0.182943	1.1352	0.135581	0.251316
16667863	AMY1A		0.313018	1.2423	0.000105793	0.00042918
16667881	AMY1A		0.283662	1.21728	0.000845688	0.00289344
16667895	LOC100129138	THAP domain containing, apoptosis associated protein 3 pseudogene	0.196695	1.14607	0.0874918	0.176877
16667918	PRMT6	protein arginine methyltransferase 6	0.0415217	1.0292	0.727652	0.834784
16667925	NTNG1	netrin G1	-0.00732	-1.00509	0.899566	0.944776
16667948	VAV3-AS1	VAV3 antisense RNA 1	-0.380848	-1.30211	1.59642e-05	7.52307e-05
16667999	LOC400768	uncharacterized LOC400768	-1.35129	-2.55141	3.07978e-16	1.09832e-14
16668002	FAM102B	family with sequence similarity 102, member B	0.00362167	1.00251	0.954457	0.975226
16668020	PRPF38B	pre-mRNA processing factor 38B	0.187878	1.13909	0.00466914	0.0136787
16668033	FNDC7	fibronectin type III domain containing 7	-0.0543317	-1.03838	0.427575	0.592603
16668047	STXBP3	syntaxin binding protein 3	0.20164	1.15	0.00701086	0.0197899
16668074	SPATA42	spermatogenesis associated 42 (non-protein coding)	0.0857883	1.06127	0.188823	0.326449
16668079	GPSM2	G-protein signaling modulator 2	-0.822097	-1.76797	3.54402e-13	6.92467e-12
16668102	TMEM167B	transmembrane protein 167B	0.338027	1.26403	0.000192954	0.000745425
16668109	SCARNA2	small Cajal body-specific RNA 2	0.430318	1.34753	4.82146e-05	0.00020815
16668111	KIAA1324	KIAA1324	0.0739667	1.05261	0.358897	0.52517
16668150	SARS	seryl-tRNA synthetase	0.50988	1.42393	5.02039e-06	2.57918e-05
16668170	CELSR2	cadherin, EGF LAG seven-pass G-type receptor 2	-0.196445	-1.14587	0.00356986	0.0107218
16668220	SYPL2	synaptophysin-like 2	-0.0856733	-1.06118	0.305956	0.468236
16668229	ATXN7L2	ataxin 7-like 2	0.0725767	1.05159	0.231401	0.380396
16668250	CYB561D1	cytochrome b561 family, member D1	0.138807	1.10099	0.206177	0.34815
16668260	GPR61	G protein-coupled receptor 61	-0.09474	-1.06787	0.229183	0.377562
16668272	GNAI3	guanine nucleotide binding protein (G protein), alpha inhibiting activity polypeptide 3	0.163667	1.12013	0.0109396	0.0295768
16668283	GNAI3	guanine nucleotide binding protein (G protein), alpha inhibiting activity polypeptide 3	0.401208	1.32061	0.000500788	0.00179394
16668286	MIR197		-0.00168333	-1.00117	0.990819	0.995496
16668288	AMPD2	adenosine monophosphate deaminase 2	-0.72879	-1.65725	3.44888e-09	3.11885e-08
16668333	GSTM4	glutathione S-transferase mu 4	1.35077	2.55049	4.1965e-14	9.69326e-13
16668355	GSTM2	glutathione S-transferase mu 2 (muscle)	0.428483	1.34582	0.00632469	0.0180376
16668375	GSTM1		-0.353042	-1.27725	0.000232211	0.00088379
16668397	GSTM5	glutathione S-transferase mu 5	0.119682	1.0865	0.233864	0.38343
16668420	CSF1	colony stimulating factor 1 (macrophage)	0.0730867	1.05196	0.294485	0.455454
16668439	AHCYL1		-0.20318	-1.15123	0.0030628	0.00932104
16668464	STRIP1	striatin interacting protein 1	-0.05486	-1.03876	0.455409	0.617006
16668513	UBL4B	ubiquitin-like 4B	0.0489717	1.03453	0.49795	0.65525
16668517	SLC6A17	solute carrier family 6 (neutral amino acid transporter), member 17	0.274097	1.20924	0.00355032	0.0106685
16668533	KCNC4	potassium channel, voltage gated Shaw related subfamily C, member 4	0.207323	1.15454	0.0246194	0.0602782
16668550	RBM15	RNA binding motif protein 15	0.253328	1.19195	5.07553e-05	0.000218107
16668556	LAMTOR5-AS1	LAMTOR5 antisense RNA 1	-0.0940367	-1.06735	0.403901	0.570084
16668564	PROK1	prokineticin 1	0.154877	1.11333	0.0257315	0.0626653
16668572	CYMP	chymosin pseudogene	0.0367533	1.0258	0.64503	0.775155
16668582	CD53	CD53 molecule	1.40396	2.64627	2.51982e-16	9.20136e-15
16668598	LOC100506293		-0.064735	-1.04589	0.489763	0.648034
16668601	RN5S54		0.15193	1.11105	0.0213665	0.0532811
16668603	CEPT1	choline/ethanolamine phosphotransferase 1	0.199627	1.1484	0.00427602	0.0126276
16668622	CHI3L2	chitinase 3-like 2	-0.161692	-1.1186	0.0143191	0.037486
16668649	CHIAP2	chitinase, acidic pseudogene 2	0.020285	1.01416	0.763667	0.859323
16668657	CHIA	chitinase, acidic	0.0720183	1.05119	0.167628	0.297028
16668677	PIFO	primary cilia formation	0.00252667	1.00175	0.97248	0.984995
16668689	ATP5F1	ATP synthase, H+ transporting, mitochondrial Fo complex, subunit B1	0.109857	1.07912	0.0967141	0.191953
16668702	C1orf162	chromosome 1 open reading frame 162	0.209962	1.15666	0.0120654	0.0322983
16668712	RAP1A	RAP1A, member of RAS oncogene family	-0.24237	-1.18293	0.00187434	0.00598538
16668726	FAM212B-AS1	FAM212B antisense RNA 1	-0.0176833	-1.01233	0.797361	0.882413
16668730	DDX20	DEAD (Asp-Glu-Ala-Asp) box polypeptide 20	-0.209127	-1.15599	0.0109875	0.0296922
16668753	KCND3-AS1		0.10957	1.07891	0.113996	0.218975
16668761	LOC643355	uncharacterized LOC643355	-0.123715	-1.08954	0.0968426	0.192182
16668772	CTTNBP2NL	CTTNBP2 N-terminal like	0.97689	1.96822	3.40242e-13	6.67866e-12
16668785	WNT2B	wingless-type MMTV integration site family, member 2B	0.00131333	1.00091	0.988229	0.993681
16668798	CAPZA1	capping protein (actin filament) muscle Z-line, alpha 1	0.218313	1.16337	0.0122459	0.0326905
16668817	MOV10	Mov10 RISC complex RNA helicase	-0.19663	-1.14602	0.00385204	0.0114894
16668861	FAM19A3	family with sequence similarity 19 (chemokine (C-C motif)-like), member A3	-0.389035	-1.30952	4.17379e-06	2.17044e-05
16668874	HP08777	uncharacterized LOC105378912	-0.0105567	-1.00734	0.901738	0.945695
16668878	AKR7A2P1	aldo-keto reductase family 7, member A2 pseudogene 1	-0.000181667	-1.00013	0.998605	0.999175
16668880	SLC16A1-AS1	SLC16A1 antisense RNA 1	-0.277057	-1.21172	0.0189898	0.0480715
16668891	LRIG2	leucine-rich repeats and immunoglobulin-like domains 2	-0.35735	-1.28107	4.80395e-05	0.000207484
16668919	MAGI3	membrane associated guanylate kinase, WW and PDZ domain containing 3	0.817423	1.76226	1.05934e-10	1.27846e-09
16668954	AP4B1-AS1	AP4B1 antisense RNA 1	-0.00871333	-1.00606	0.915279	0.953109
16668960	DCLRE1B	DNA cross-link repair 1B	-0.46821	-1.38339	1.23307e-06	7.04003e-06
16668969	HIPK1	homeodomain interacting protein kinase 1	-0.100087	-1.07184	0.188293	0.325835
16668997	OLFML3	olfactomedin-like 3	-0.186223	-1.13778	0.0509553	0.112384
16669013	SYCP1	synaptonemal complex protein 1	0.0564933	1.03993	0.434518	0.598942
16669053	TSHB	thyroid stimulating hormone, beta	-0.0845233	-1.06034	0.403709	0.569975
16669067	VANGL1	VANGL planar cell polarity protein 1	-1.08031	-2.1145	1.40217e-13	2.95686e-12
16669080	LOC101928995	uncharacterized LOC101928995	0.169217	1.12445	0.00192538	0.00613588
16669087	SLC22A15	solute carrier family 22, member 15	1.72938	3.31585	8.70345e-16	2.77069e-14
16669105	MAB21L3	mab-21-like 3 (C. elegans)	-0.024065	-1.01682	0.787811	0.875388
16669121	ATP1A1	ATPase, Na+/K+ transporting, alpha 1 polypeptide	0.08476	1.06051	0.254784	0.409086
16669161	MIR320B1	microRNA 320b-1	0.132563	1.09624	0.280118	0.43893
16669163	C1orf137	chromosome 1 open reading frame 137	0.0974617	1.06989	0.124502	0.235065
16669169	CD2	CD2 molecule	-0.00649667	-1.00451	0.95524	0.975608
16669180	PTGFRN	prostaglandin F2 receptor inhibitor	1.17494	2.25784	1.01647e-12	1.81147e-11
16669196	CD101	CD101 molecule	-0.091795	-1.0657	0.207266	0.349296
16669212	TTF2	transcription termination factor, RNA polymerase II	0.0241833	1.0169	0.754596	0.853406
16669243	MIR942		-0.09405	-1.06736	0.334548	0.4986
16669245	TTF2	transcription termination factor, RNA polymerase II	0.137403	1.09992	0.333135	0.496992
16669248	LOC100506478		0.122507	1.08862	0.161875	0.289091
16669255	MAN1A2	mannosidase, alpha, class 1A, member 2	-0.331802	-1.25858	8.07191e-06	3.99599e-05
16669278	FAM46C	family with sequence similarity 46, member C	-2.43391	-5.40355	4.13736e-21	4.93124e-19
16669285	GDAP2		-0.0424167	-1.02984	0.634796	0.767157
16669288	WDR3	WD repeat domain 3	-0.119967	-1.08671	0.068135	0.143549
16669324	LOC101929147	uncharacterized LOC101929147	0.334918	1.26131	0.0021058	0.00665182
16669347	HAO2	hydroxyacid oxidase 2 (long chain)	0.155913	1.11413	0.0410687	0.0937142
16669361	HAO2-IT1	HAO2 intronic transcript 1	0.00951833	1.00662	0.901133	0.945327
16669364	HSD3B2		0.148325	1.10828	0.11681	0.223288
16669374	HSD3B1		-0.100507	-1.07215	0.19255	0.33145
16669384	HSD3BP4	hydroxy-delta-5-steroid dehydrogenase, 3 beta, pseudogene 4	-0.114355	-1.08249	0.129803	0.242978
16669389	PHGDH	phosphoglycerate dehydrogenase	1.57608	2.98158	1.30435e-19	1.00169e-17
16669422	FAM72B		-0.0305717	-1.02142	0.798225	0.882983
16669437	HIST2H2BA	histone cluster 2, H2ba (pseudogene)	1.47649	2.7827	1.76261e-16	6.73339e-15
16669443	HIST2H2BF	histone cluster 2, H2bf	0.0954267	1.06838	0.184106	0.320003
16669454	EMBP1	embigin pseudogene 1	-0.473335	-1.38832	0.00270123	0.00833388
16669483	MIR3118-1		-0.143612	-1.10467	0.117591	0.224462
16669499	MIR3118-1		-0.164688	-1.12092	0.0598561	0.128635
16669501	LINC00328	long intergenic non-protein coding RNA 328	-1.50731	-2.8428	2.66591e-08	2.0574e-07
16669549	LOC100132057	phosphodiesterase 4D interacting protein pseudogene	0.966133	1.9536	1.21351e-06	6.94028e-06
16669566	RNVU1-3	RNA, variant U1 small nuclear 3	2.37118	5.17364	7.77582e-20	6.32893e-18
16669568	SRGAP2	SLIT-ROBO Rho GTPase activating protein 2	0.447968	1.36412	0.00165082	0.00533739
16669573	NBPF9		-0.07383	-1.05251	0.268694	0.425596
16669626	LOC100996740	uncharacterized LOC100996740	1.11584	2.16721	9.56178e-13	1.71324e-11
16669700	SEC22B		-0.173867	-1.12808	0.0498017	0.11018
16669708	NOTCH2NL	notch 2 N-terminal like	0.02242	1.01566	0.77612	0.86793
16669721	NBPF10		0.14682	1.10713	0.223178	0.370229
16669781	NOTCH2NL		0.381327	1.30254	0.00707304	0.0199503
16669783	NOTCH2NL	notch 2 N-terminal like	0.228375	1.17151	0.0530245	0.116234
16669785	RNVU1-6	RNA, variant U1 small nuclear 6	1.01665	2.02321	6.47747e-09	5.60747e-08
16669787	HFE2	hemochromatosis type 2 (juvenile)	-0.0475933	-1.03354	0.460365	0.621602
16669796	TXNIP	thioredoxin interacting protein	1.67396	3.1909	3.40782e-16	1.20027e-14
16669814	ANKRD34A	ankyrin repeat domain 34A	0.0604267	1.04277	0.40518	0.571077
16669821	LIX1L	limb and CNS expressed 1 like	0.129437	1.09387	0.0875125	0.176907
16669830	RBM8A	RNA binding motif protein 8A	0.0596183	1.04219	0.345634	0.510451
16669840	PEX11B	peroxisomal biogenesis factor 11 beta	0.050655	1.03574	0.488993	0.647205
16669850	ITGA10	integrin, alpha 10	-0.167292	-1.12295	0.0211617	0.0528679
16669888	ANKRD35	ankyrin repeat domain 35	-0.48714	-1.40166	2.45814e-08	1.90892e-07
16669905	PIAS3	protein inhibitor of activated STAT, 3	-0.46405	-1.37941	1.76733e-06	9.81753e-06
16669930	RNF115	ring finger protein 115	0.0387083	1.02719	0.614339	0.7511
16669944	PDZK1	PDZ domain containing 1	0.0691333	1.04909	0.472664	0.632249
16669960	NBPF25P	neuroblastoma breakpoint family, member 25, pseudogene	-0.014795	-1.01031	0.857117	0.919713
16669963	GPR89C		-0.0801983	-1.05716	0.227262	0.375248
16669992	LOC100505824	uncharacterized LOC100505824	0.030355	1.02126	0.714523	0.8252
16669995	RN5S57		0.0731567	1.05202	0.331796	0.495519
16669997	NBPF12	neuroblastoma breakpoint family, member 12	0.0512433	1.03616	0.75963	0.856772
16670079	PDIA3P1	protein disulfide isomerase family A, member 3 pseudogene 1	-2.21445	-4.64105	2.22718e-11	3.07237e-10
16670081	CHD1L	chromodomain helicase DNA binding protein 1-like	0.09276	1.06641	0.126704	0.23827
16670114	BCL9	B-cell CLL/lymphoma 9	-1.42403	-2.68334	2.88373e-15	8.27011e-14
16670134	LOC102723321	uncharacterized LOC102723321	0.163128	1.11971	0.0393771	0.0903805
16670138	GJA8	gap junction protein, alpha 8, 50kDa	-0.0562333	-1.03975	0.491074	0.649152
16670141	GPR89B		-0.169687	-1.12481	0.00305405	0.00929819
16670172	LOC100505824	uncharacterized LOC100505824	0.113138	1.08158	0.432806	0.597467
16670176	RN5S57		0.0731567	1.05202	0.331796	0.495519
16670185	LOC284561	uncharacterized LOC284561	0.0255217	1.01785	0.832623	0.905003
16670188	LOC101929325	uncharacterized LOC101929325	-0.0108467	-1.00755	0.860095	0.921216
16670197	RNVU1-3	RNA, variant U1 small nuclear 3	2.37118	5.17364	7.77582e-20	6.32893e-18
16670199	LOC100132057	phosphodiesterase 4D interacting protein pseudogene	0.789937	1.729	6.92326e-08	4.94469e-07
16670210	RNVU1-19	RNA, variant U1 small nuclear 19	0.90054	1.86676	8.54297e-10	8.72959e-09
16670212	RNVU1-14	RNA, variant U1 small nuclear 14	1.70769	3.26638	8.49478e-09	7.22165e-08
16670217	NBPF15	neuroblastoma breakpoint family, member 15	0.531243	1.44517	0.00256455	0.00795172
16670250	NBPF16		-0.0451483	-1.03179	0.534084	0.686131
16670270	PPIAL4A		0.0746867	1.05313	0.404939	0.570922
16670276	LOC645166		-0.243963	-1.18424	0.00850357	0.0235703
16670309	FAM91A2		1.07762	2.11055	4.33629e-11	5.63983e-10
16670317	FCGR1C	Fc fragment of IgG, high affinity Ic, receptor (CD64), pseudogene	0.156775	1.11479	0.267645	0.424362
16670328	PPIAL4C		-0.0271917	-1.01903	0.82413	0.899161
16670332	LINC00869	long intergenic non-protein coding RNA 869	2.15186	4.44401	1.08036e-20	1.11005e-18
16670359	RNVU1-4	RNA, variant U1 small nuclear 4	2.67331	6.3789	4.47072e-21	5.26538e-19
16670364	LOC644634		0.692088	1.61562	8.64562e-05	0.000355967
16670367	FCGR1A		2.68435	6.4279	9.49927e-22	1.36739e-19
16670377	HIST2H4B		1.10381	2.14922	2.28642e-15	6.70557e-14
16670383	HIST2H2AA4		0.0730667	1.05195	0.215203	0.359946
16670387	HIST2H3D		0.222848	1.16704	0.00128466	0.00424708
16670391	BOLA1	bolA family member 1	-0.543573	-1.45758	2.17417e-07	1.41883e-06
16670401	HIST2H2AC	histone cluster 2, H2ac	0.0175333	1.01223	0.742666	0.844982
16670404	VPS45	vacuolar protein sorting 45 homolog (S. cerevisiae)	-0.044455	-1.03129	0.535362	0.687416
16670432	PLEKHO1	pleckstrin homology domain containing, family O member 1	0.153693	1.11241	0.0347828	0.0813532
16670454	CA14	carbonic anhydrase XIV	0.00345167	1.0024	0.949838	0.972488
16670469	C1orf54	chromosome 1 open reading frame 54	1.16712	2.24563	5.99445e-13	1.11635e-11
16670479	CIART	circadian associated repressor of transcription	0.468227	1.38341	9.23523e-06	4.52305e-05
16670492	MRPS21	mitochondrial ribosomal protein S21	0.948325	1.92963	2.0223e-15	6.00784e-14
16670499	PRPF3	pre-mRNA processing factor 3	0.05451	1.03851	0.535731	0.687742
16670527	RPRD2	regulation of nuclear pre-mRNA domain containing 2	0.519885	1.43384	1.1277e-09	1.12727e-08
16670547	TARS2		0.195653	1.14524	0.0161657	0.0417625
16670574	ECM1	extracellular matrix protein 1	1.09788	2.14039	7.88899e-14	1.72971e-12
16670592	FALEC	focally amplified long non-coding RNA in epithelial cancer	0.230028	1.17286	0.0154471	0.0401112
16670599	ADAMTSL4	ADAMTS-like 4	0.874105	1.83287	7.27094e-11	9.04602e-10
16670632	SETDB1	SET domain, bifurcated 1	0.511615	1.42565	1.29602e-07	8.78667e-07
16670681	ANXA9	annexin A9	-0.938858	-1.91701	2.03183e-10	2.31697e-09
16670697	PRUNE	prune exopolyphosphatase	0.25673	1.19477	0.00271425	0.00836972
16670710	BNIPL	BCL2/adenovirus E1B 19kD interacting protein like	-0.11381	-1.08208	0.132724	0.247189
16670728	C1orf56	chromosome 1 open reading frame 56	-0.0598283	-1.04234	0.5131	0.668247
16670739	MLLT11	myeloid/lymphoid or mixed-lineage leukemia; translocated to, 11	-1.71868	-3.29135	8.27022e-19	5.38052e-17
16670743	GABPB2	GA binding protein transcription factor, beta subunit 2	0.707037	1.63245	2.37385e-07	1.53769e-06
16670758	SCNM1		0.53951	1.45348	4.0849e-09	3.65628e-08
16670774	PIP5K1A		0.17976	1.1327	0.104044	0.203545
16670803	PSMD4		0.270728	1.20642	0.0264025	0.0640594
16670826	ZNF687	zinc finger protein 687	0.28089	1.21494	0.00873005	0.0241285
16670847	GBAT2	glioblastoma multiforme-associated transcript 2	-0.159628	-1.117	0.0717064	0.149729
16670850	PSMB4	proteasome subunit beta 4	0.161967	1.11881	0.020025	0.0503616
16670866	CGN	cingulin	0.0597517	1.04229	0.344024	0.508905
16670894	TUFT1	tuftelin 1	-0.0183017	-1.01277	0.77401	0.866437
16670918	MIR554	microRNA 554	-0.01265	-1.00881	0.829326	0.902667
16670920	SNX27	sorting nexin family member 27	0.198522	1.14752	0.00536924	0.0155509
16670940	CELF3		0.105408	1.0758	0.259259	0.41426
16670943	RIIAD1	regulatory subunit of type II PKA R-subunit (RIIa) domain containing 1	0.112767	1.0813	0.21384	0.358288
16670959	OAZ3	ornithine decarboxylase antizyme 3	0.072565	1.05158	0.349007	0.51421
16670975	LOC100132111	uncharacterized LOC100132111	-0.107635	-1.07746	0.274965	0.433064
16670981	NBPF18P	neuroblastoma breakpoint family, member 18, pseudogene	0.127547	1.09243	0.109808	0.212548
16670997	FLG-AS1	FLG antisense RNA 1	-0.645782	-1.56459	3.94518e-08	2.9514e-07
16671019	LCE5A	late cornified envelope 5A	-0.00351333	-1.00244	0.968244	0.982955
16671023	CRCT1	cysteine-rich C-terminal 1	0.139217	1.10131	0.0645049	0.137006
16671027	LCE3C	late cornified envelope 3C	-0.0419783	-1.02952	0.577189	0.722474
16671031	LCE3B	late cornified envelope 3B	0.258135	1.19593	0.12467	0.235307
16671033	LINC00302	long intergenic non-protein coding RNA 302	-0.0764583	-1.05443	0.332745	0.49651
16671037	LCE2D	late cornified envelope 2D	0.0828683	1.05912	0.435431	0.599369
16671041	LCE2C	late cornified envelope 2C	0.273067	1.20837	0.0056507	0.0162822
16671045	LCE2B	late cornified envelope 2B	0.165788	1.12178	0.212431	0.356248
16671049	LCE2A	late cornified envelope 2A	0.106375	1.07652	0.275952	0.434197
16671053	LCE4A	late cornified envelope 4A	0.101313	1.07275	0.226138	0.373806
16671057	C1orf68	chromosome 1 open reading frame 68	-0.134278	-1.09754	0.156434	0.281664
16671061	KPRP	keratinocyte proline-rich protein	-0.207767	-1.1549	0.0214515	0.0534798
16671065	LCE1F	late cornified envelope 1F	0.0515233	1.03636	0.551522	0.701369
16671068	LCE1E	late cornified envelope 1E	0.181742	1.13425	0.0240417	0.0590577
16671077	LCE1B	late cornified envelope 1B	-0.145733	-1.10629	0.165994	0.294674
16671082	LCE1A	late cornified envelope 1A	0.05287	1.03733	0.526633	0.680312
16671086	LCE6A	late cornified envelope 6A	0.0963883	1.06909	0.161122	0.288085
16671090	SMCP	sperm mitochondria-associated cysteine-rich protein	0.0661417	1.04691	0.403675	0.569953
16671094	IVL	involucrin	-0.0411183	-1.02891	0.637649	0.769395
16671100	SPRR4	small proline-rich protein 4	0.0477417	1.03365	0.644565	0.774815
16671104	SPRR1A	small proline-rich protein 1A	0.0405633	1.02852	0.632963	0.765718
16671108	SPRR3	small proline-rich protein 3	0.0448733	1.03159	0.607346	0.745494
16671115	SPRR1B	small proline-rich protein 1B	0.18247	1.13483	0.131067	0.24484
16671121	LOC101928009	uncharacterized LOC101928009	-0.0487917	-1.0344	0.481392	0.640276
16671125	LELP1	late cornified envelope-like proline-rich 1	-0.00585167	-1.00406	0.932595	0.96294
16671129	PRR9	proline rich 9	-0.0491133	-1.03463	0.559382	0.707917
16671133	LOR	loricrin	-0.00216667	-1.0015	0.981188	0.989849
16671139	S100A9	S100 calcium binding protein A9	-0.123735	-1.08955	0.232126	0.38123
16671144	S100A7A	S100 calcium binding protein A7A	0.1795	1.13249	0.0474159	0.105824
16671151	LOC100505623		0.156075	1.11425	0.108175	0.210067
16671154	S100A1	S100 calcium binding protein A1	0.105587	1.07593	0.168257	0.298001
16671166	CHTOP	chromatin target of PRMT1	0.578182	1.49297	1.31633e-10	1.56142e-09
16671178	SNAPIN	SNAP-associated protein	0.102265	1.07346	0.292432	0.453267
16671187	NPR1	natriuretic peptide receptor 1	-0.0234767	-1.01641	0.714497	0.8252
16671217	INTS3	integrator complex subunit 3	0.10374	1.07456	0.0917968	0.183933
16671264	SLC27A3	solute carrier family 27 (fatty acid transporter), member 3	0.977845	1.96952	1.36776e-12	2.38056e-11
16671292	LOC343052		-0.0620033	-1.04391	0.350164	0.515404
16671305	CREB3L4	cAMP responsive element binding protein 3-like 4	0.099305	1.07126	0.265045	0.421202
16671325	RPS27	ribosomal protein S27	1.07747	2.11033	3.67293e-14	8.59044e-13
16671334	UBAP2L	ubiquitin associated protein 2-like	0.124377	1.09004	0.0186641	0.0473548
16671381	HAX1	HCLS1 associated protein X-1	0.333883	1.2604	0.000380764	0.00139364
16671405	AQP10	aquaporin 10	0.0162567	1.01133	0.843736	0.911956
16671416	ATP8B2	ATPase, aminophospholipid transporter, class I, type 8B, member 2	-2.18567	-4.54937	1.58554e-19	1.20214e-17
16671455	RNU7-57P		-0.513435	-1.42744	0.000839639	0.00287472
16671457	IL6R	interleukin 6 receptor	-0.639015	-1.55727	1.26406e-10	1.50601e-09
16671472	TDRD10	tudor domain containing 10	-0.0304067	-1.0213	0.681697	0.801805
16671491	UBE2Q1-AS1		0.0375733	1.02639	0.652664	0.780613
16671494	CHRNB2	cholinergic receptor, nicotinic, beta 2 (neuronal)	-0.0393967	-1.02768	0.618564	0.754178
16671503	CKS1B	CDC28 protein kinase regulatory subunit 1B	0.20428	1.15211	0.0156186	0.0405191
16671514	MIR4258	microRNA 4258	0.047205	1.03326	0.65698	0.783352
16671516	FLAD1	flavin adenine dinucleotide synthetase 1	0.319385	1.2478	2.14928e-05	9.88458e-05
16671540	LENEP	lens epithelial protein	-0.0775833	-1.05525	0.316352	0.47939
16671545	ZBTB7B	zinc finger and BTB domain containing 7B	-0.355225	-1.27919	7.10533e-05	0.000296856
16671555	DCST1	DC-STAMP domain containing 1	0.0509733	1.03596	0.399908	0.566648
16671579	ADAM15	ADAM metallopeptidase domain 15	-0.301853	-1.23273	0.000402012	0.00146439
16671623	EFNA4	ephrin-A4	-0.00765833	-1.00532	0.934165	0.963796
16671632	EFNA3	ephrin-A3	-1.36384	-2.57369	1.75914e-13	3.64768e-12
16671642	EFNA1	ephrin-A1	-0.085525	-1.06107	0.297582	0.458924
16671653	SLC50A1	solute carrier family 50 (sugar efflux transporter), member 1	-0.706223	-1.63153	7.50929e-11	9.31146e-10
16671671	TRIM46	tripartite motif containing 46	0.371697	1.29387	2.383e-06	1.29267e-05
16671692	MIR92B	microRNA 92b	-0.105947	-1.0762	0.482176	0.641058
16671694	LOC100653116		0.24755	1.18719	0.000597077	0.00210322
16671707	MTX1	metaxin 1	0.19287	1.14304	0.00562737	0.0162244
16671723	HCN3	hyperpolarization activated cyclic nucleotide gated potassium channel 3	-0.137757	-1.10019	0.102244	0.200709
16671738	FDPS	farnesyl diphosphate synthase	0.187225	1.13857	0.0074503	0.0209194
16671759	RUSC1	RUN and SH3 domain containing 1	0.327643	1.25496	7.97019e-06	3.95023e-05
16671784	POU5F1P4	POU class 5 homeobox 1 pseudogene 4	-0.438263	-1.35497	0.00128582	0.00425046
16671786	ASH1L-AS1	ASH1L antisense RNA 1	0.285918	1.21919	0.00366682	0.010982
16671791	MSTO1		0.221945	1.1663	0.130406	0.243862
16671823	DAP3	death associated protein 3	0.268655	1.20468	0.00010855	0.000439288
16671856	MSTO2P		0.0139683	1.00973	0.908562	0.949765
16671874	SYT11	synaptotagmin XI	-0.838918	-1.78871	2.22267e-11	3.06757e-10
16671884	RXFP4	relaxin/insulin-like family peptide receptor 4	0.14809	1.1081	0.153102	0.276769
16671889	LAMTOR2	late endosomal/lysosomal adaptor, MAPK and MTOR activator 2	0.458618	1.37423	4.12742e-05	0.0001811
16671901	RAB25	RAB25, member RAS oncogene family	0.190707	1.14132	0.0639228	0.135953
16671914	LMNA	lamin A/C	0.424885	1.34247	8.65099e-07	5.07328e-06
16671960	SEMA4A	sema domain, immunoglobulin domain (Ig), transmembrane domain (TM) and short cytoplasmic domain, (semaphorin) 4A	0.355005	1.27899	2.86982e-05	0.000129328
16671992	SLC25A44	solute carrier family 25, member 44	-0.0747933	-1.05321	0.362397	0.528786
16672006	PMF1-BGLAP		0.110523	1.07962	0.0778015	0.160288
16672027	TMEM79	transmembrane protein 79	0.0214983	1.01501	0.804195	0.887279
16672043	TSACC	TSSK6 activating co-chaperone	0.0819433	1.05844	0.223297	0.370385
16672052	RHBG	Rh family, B glycoprotein (gene/pseudogene)	0.131618	1.09552	0.0961793	0.191082
16672082	TTC24	tetratricopeptide repeat domain 24	0.211405	1.15782	0.0231074	0.0570448
16672097	APOA1BP	apolipoprotein A-I binding protein	0.240423	1.18134	0.00168905	0.00544801
16672111	HAPLN2	hyaluronan and proteoglycan link protein 2	-0.0209533	-1.01463	0.757623	0.855498
16672126	BCAN	brevican	-0.0833233	-1.05946	0.221062	0.367311
16672151	RRNAD1	ribosomal RNA adenine dimethylase domain containing 1	0.508605	1.42267	2.19187e-05	0.000100618
16672170	PRCC	papillary renal cell carcinoma (translocation-associated)	0.03922	1.02756	0.570597	0.717296
16672186	NTRK1	neurotrophic tyrosine kinase, receptor, type 1	0.00160333	1.00111	0.983007	0.99062
16672214	PEAR1	platelet endothelial aggregation receptor 1	-0.108607	-1.07819	0.0896894	0.180424
16672243	LRRC71	leucine rich repeat containing 71	0.221288	1.16577	0.005345	0.0154852
16672265	CYCSP52	cytochrome c, somatic pseudogene 52	0.325262	1.25289	0.00322988	0.00977956
16672279	KIRREL	kin of IRRE like (Drosophila)	0.07284	1.05179	0.316365	0.47939
16672298	KIRREL-IT1	KIRREL intronic transcript 1	0.069635	1.04945	0.397309	0.56404
16672306	CD1D	CD1d molecule	0.348945	1.27363	4.73453e-05	0.000204693
16672315	CD1A	CD1a molecule	-0.117157	-1.0846	0.0945395	0.188426
16672323	CD1C	CD1c molecule	-0.01085	-1.00755	0.894584	0.941939
16672333	CD1E	CD1e molecule	-0.0712883	-1.05065	0.429596	0.594675
16672349	OR10K1	olfactory receptor, family 10, subfamily K, member 1	0.0630017	1.04464	0.316768	0.479781
16672353	OR10R2	olfactory receptor, family 10, subfamily R, member 2	0.18633	1.13787	0.0273369	0.0660148
16672355	OR10Z1	olfactory receptor, family 10, subfamily Z, member 1	0.0553367	1.0391	0.551877	0.701548
16672358	OR6K6	olfactory receptor, family 6, subfamily K, member 6	-0.00348833	-1.00242	0.965666	0.98141
16672362	MNDA	myeloid cell nuclear differentiation antigen	-0.0809417	-1.05771	0.256315	0.410702
16672373	PYHIN1	pyrin and HIN domain family, member 1	-0.608167	-1.52432	5.30928e-07	3.24847e-06
16672390	IFI16	interferon, gamma-inducible protein 16	-2.04994	-4.14088	1.6324e-20	1.62135e-18
16672412	CADM3	cell adhesion molecule 3	0.0859767	1.06141	0.312225	0.475028
16672426	RN5S60		0.017645	1.01231	0.889348	0.938715
16672428	ACKR1	atypical chemokine receptor 1 (Duffy blood group)	0.0143883	1.01002	0.889623	0.938894
16672435	FCER1A	Fc fragment of IgE, high affinity I, receptor for; alpha polypeptide	-0.0149033	-1.01038	0.846022	0.913329
16672444	OR10J1	olfactory receptor, family 10, subfamily J, member 1	-0.0219483	-1.01533	0.730226	0.836739
16672452	APCS	amyloid P component, serum	0.277788	1.21233	0.00163843	0.00530138
16672457	DUSP23	dual specificity phosphatase 23	0.441335	1.35786	2.72681e-05	0.00012335
16672462	FCRL6	Fc receptor-like 6	0.0176033	1.01228	0.830541	0.903398
16672478	SLAMF8	SLAM family member 8	-2.30976	-4.95801	1.82952e-17	8.68059e-16
16672489	LINC01133	long intergenic non-protein coding RNA 1133	0.178618	1.1318	0.0182698	0.0464809
16672500	KCNJ9	potassium channel, inwardly rectifying subfamily J, member 9	-0.0830817	-1.05928	0.259439	0.414308
16672505	ATP1A2	ATPase, Na+/K+ transporting, alpha 2 polypeptide	-0.0396383	-1.02786	0.61439	0.7511
16672538	ATP1A4	ATPase, Na+/K+ transporting, alpha 4 polypeptide	0.141343	1.10293	0.0732923	0.152612
16672567	CASQ1	calsequestrin 1 (fast-twitch, skeletal muscle)	0.131933	1.09576	0.158363	0.284295
16672583	PEA15	phosphoprotein enriched in astrocytes 15	-0.4618	-1.37726	3.95575e-07	2.46486e-06
16672593	DCAF8	DDB1 and CUL4 associated factor 8	-0.016905	-1.01179	0.831834	0.904511
16672596	SUMO1P3	SUMO1 pseudogene 3 (functional)	-0.00927667	-1.00645	0.943908	0.969265
16672598	NCSTN	nicastrin	0.432643	1.3497	2.97012e-07	1.89306e-06
16672630	NHLH1	nescient helix loop helix 1	0.0993033	1.07126	0.219355	0.365001
16672635	VANGL2	VANGL planar cell polarity protein 2	0.155775	1.11402	0.0798235	0.163944
16672654	SLAMF7	SLAM family member 7	0.106983	1.07697	0.138	0.254818
16672669	LY9	lymphocyte antigen 9	-0.0941767	-1.06746	0.220805	0.366986
16672699	LOC101928372	uncharacterized LOC101928372	0.0648267	1.04596	0.492698	0.650721
16672710	KLHDC9	kelch domain containing 9	0.0385333	1.02707	0.539637	0.690608
16672722	NIT1	nitrilase 1	0.225137	1.16889	0.00961104	0.0263459
16672738	UFC1	ubiquitin-fold modifier conjugating enzyme 1	0.633872	1.55172	2.18972e-09	2.06674e-08
16672754	USP21	ubiquitin specific peptidase 21	0.23901	1.18018	0.00690768	0.0195209
16672779	PPOX	protoporphyrinogen oxidase	-0.223642	-1.16768	0.00815092	0.0226968
16672808	NDUFS2	NADH dehydrogenase (ubiquinone) Fe-S protein 2, 49kDa (NADH-coenzyme Q reductase)	0.28804	1.22098	0.000189387	0.000732592
16672838	FCER1G	Fc fragment of IgE, high affinity I, receptor for; gamma polypeptide	-1.06687	-2.09488	9.09815e-14	1.97449e-12
16672847	TOMM40L	translocase of outer mitochondrial membrane 40 homolog (yeast)-like	0.112398	1.08102	0.31978	0.483049
16672864	PCP4L1	Purkinje cell protein 4 like 1	-0.0452033	-1.03183	0.582579	0.727153
16672872	SDHC	succinate dehydrogenase complex, subunit C, integral membrane protein, 15kDa	0.453412	1.36927	1.78124e-06	9.88926e-06
16672885	SDHC	succinate dehydrogenase complex, subunit C, integral membrane protein, 15kDa	0.498055	1.41231	6.89259e-05	0.000288615
16672888	LOC100505703		0.086515	1.0618	0.294784	0.455821
16672893	FCGR2A	Fc fragment of IgG, low affinity IIa, receptor (CD32)	0.537892	1.45185	2.54936e-05	0.000115762
16672914	HSPA6	heat shock 70kDa protein 6 (HSP70B')	0.194187	1.14408	0.0366748	0.0851156
16672920	FCGR2B	Fc fragment of IgG, low affinity IIb, receptor (CD32)	0.637203	1.55531	2.82073e-07	1.80325e-06
16672942	HSPA7	heat shock 70kDa protein 7 (HSP70B)	0.337023	1.26315	0.000855201	0.00292397
16672946	FCRLA	Fc receptor-like A	0.132108	1.09589	0.143587	0.263032
16672961	FCRLB	Fc receptor-like B	-0.16004	-1.11732	0.0211213	0.0527846
16672975	DUSP12	dual specificity phosphatase 12	0.0732933	1.05212	0.228724	0.377056
16672988	ATF6	activating transcription factor 6	0.885792	1.84778	3.99991e-11	5.24583e-10
16673012	NOS1AP	nitric oxide synthase 1 (neuronal) adaptor protein	-0.0638483	-1.04525	0.435946	0.599875
16673032	RN5S61		0.0143617	1.01	0.855501	0.919005
16673034	MIR556	microRNA 556	-0.140558	-1.10233	0.143488	0.262898
16673036	C1orf226		-0.207357	-1.15457	0.00359672	0.0107927
16673043	UHMK1	U2AF homology motif (UHM) kinase 1	0.646507	1.56537	6.33e-11	7.98202e-10
16673056	UAP1	UDP-N-acetylglucosamine pyrophosphorylase 1	0.12534	1.09076	0.0282788	0.0679424
16673075	DDR2	discoidin domain receptor tyrosine kinase 2	0.038295	1.0269	0.567966	0.714984
16673104	HSD17B7		1.31743	2.49222	2.02851e-13	4.1428e-12
16673126	RGS4	regulator of G-protein signaling 4	0.113702	1.082	0.181253	0.316039
16673146	LOC101928404	uncharacterized LOC101928404	-0.0933567	-1.06685	0.158513	0.284531
16673154	NUF2	NUF2, NDC80 kinetochore complex component	-0.110387	-1.07952	0.177458	0.310841
16673185	RN5S63		0.0659017	1.04674	0.425655	0.590715
16673189	RNU5F-6P		-0.168412	-1.12382	0.0839986	0.17101
16673191	PBX1	pre-B-cell leukemia homeobox 1	0.125822	1.09113	0.141511	0.259866
16673229	PBX1	pre-B-cell leukemia homeobox 1	0.0490983	1.03462	0.697558	0.81276
16673241	LRRC52	leucine rich repeat containing 52	-0.32412	-1.2519	4.1849e-05	0.000183379
16673251	MGST3	microsomal glutathione S-transferase 3	0.0601633	1.04258	0.470779	0.630605
16673268	MGST3	microsomal glutathione S-transferase 3	0.118413	1.08554	0.226943	0.374825
16673270	LOC440700	carbonic anhydrase XIV (CA14) pseudogene	-0.143015	-1.10421	0.228203	0.376489
16673275	LOC100147773	uncharacterized LOC100147773	0.0477417	1.03365	0.655988	0.782673
16673278	UCK2		-0.0147383	-1.01027	0.854501	0.918295
16673296	RN5S64		0.00941167	1.00654	0.934724	0.964006
16673307	FMO9P	flavin containing monooxygenase 9 pseudogene	-0.0337383	-1.02366	0.599462	0.739864
16673315	POGK	pogo transposable element with KRAB domain	0.246947	1.18669	0.000463376	0.00167198
16673323	MAEL	maelstrom spermatogenic transposon silencer	0.152282	1.11133	0.0304909	0.0726191
16673341	RN5S65		0.222632	1.16686	0.160764	0.287636
16673348	DUSP27	dual specificity phosphatase 27 (putative)	-0.155862	-1.11409	0.0686787	0.14447
16673359	POU2F1	POU class 2 homeobox 1	0.482055	1.39673	5.84209e-06	2.96654e-05
16673393	RCSD1	RCSD domain containing 1	0.810243	1.75351	2.75216e-10	3.06909e-09
16673410	MPZL1	myelin protein zero-like 1	-0.0951033	-1.06814	0.0745749	0.1547
16673428	DCAF6	DDB1 and CUL4 associated factor 6	0.246393	1.18624	0.000629779	0.00221005
16673466	TIPRL	TOR signaling pathway regulator	0.134228	1.09751	0.049289	0.109235
16673477	SFT2D2	SFT2 domain containing 2	0.294995	1.22688	0.000360584	0.00132581
16673489	TBX19	T-box 19	0.170222	1.12523	0.0328414	0.0774434
16673505	MIR557	microRNA 557	-0.196685	-1.14606	0.0869224	0.175869
16673507	XCL1	chemokine (C motif) ligand 1	-0.131507	-1.09544	0.120596	0.229243
16673513	LINC00626	long intergenic non-protein coding RNA 626	0.107352	1.07725	0.168797	0.298707
16673520	RN5S66		0.100038	1.0718	0.3337	0.49771
16673522	LOC101928596	probable tumor suppressor protein MN1	0.12506	1.09055	0.167296	0.296492
16673525	ATP1B1	ATPase, Na+/K+ transporting, beta 1 polypeptide	-0.925487	-1.89932	2.43495e-10	2.74515e-09
16673544	BLZF1	basic leucine zipper nuclear factor 1	0.529252	1.44318	0.000122819	0.00049268
16673557	C1orf112	chromosome 1 open reading frame 112	0.418657	1.33668	1.04891e-07	7.23645e-07
16673601	METTL11B	methyltransferase like 11B	-0.0604417	-1.04278	0.40568	0.571514
16673610	MIR3119-2		0.0868483	1.06205	0.307714	0.47006
16673617	GORAB	golgin, RAB6-interacting	0.867993	1.82512	1.29974e-10	1.54296e-09
16673636	PRRX1	paired related homeobox 1	0.028395	1.01988	0.717731	0.827353
16673652	LOC100127910	uncharacterized LOC100127910	-0.00631333	-1.00439	0.919823	0.955215
16673654	MROH9	maestro heat-like repeat family member 9	0.0200833	1.01402	0.773405	0.866094
16673682	FMO3	flavin containing monooxygenase 3	-0.0822517	-1.05867	0.224199	0.371591
16673698	FMO6P	flavin containing monooxygenase 6 pseudogene	-0.0938867	-1.06724	0.210182	0.353172
16673713	FMO2	flavin containing monooxygenase 2 (non-functional)	0.04795	1.03379	0.580072	0.724957
16673731	FMO1	flavin containing monooxygenase 1	0.07722	1.05498	0.247069	0.399691
16673748	FMO4	flavin containing monooxygenase 4	-0.006945	-1.00483	0.9165	0.953658
16673763	TOP1P1	topoisomerase (DNA) I pseudogene 1	-0.0665967	-1.04724	0.378419	0.544828
16673767	PRRC2C	proline-rich coiled-coil 2C	0.0173667	1.01211	0.776624	0.868072
16673822	METTL13	methyltransferase like 13	0.320707	1.24894	3.02437e-05	0.00013578
16673842	DNM3	dynamin 3	-0.922455	-1.89534	2.39538e-11	3.28615e-10
16673874	DNM3-IT1		0.08711	1.06224	0.426979	0.592084
16673877	MIR3120	microRNA 3120	0.02906	1.02035	0.745781	0.847232
16673883	C1orf105	chromosome 1 open reading frame 105	0.061005	1.04319	0.451936	0.614004
16673899	SUCO	SUN domain containing ossification factor	-0.215318	-1.16096	0.0022523	0.00707109
16673928	FASLG	Fas ligand (TNF superfamily, member 6)	-0.0698133	-1.04958	0.362256	0.528683
16673945	PRDX6	peroxiredoxin 6	-0.12433	-1.09	0.0221161	0.0549022
16673955	SLC9C2		0.157262	1.11517	0.0559959	0.121718
16673958	LOC730159	uncharacterized LOC730159	0.0216933	1.01515	0.807947	0.889371
16673961	KLHL20	kelch-like family member 20	0.366948	1.28962	1.9458e-05	9.02538e-05
16673983	DARS2	aspartyl-tRNA synthetase 2, mitochondrial	-0.297862	-1.22932	0.00281669	0.00866139
16674005	GAS5-AS1		0.11813	1.08533	0.266675	0.423274
16674008	ZBTB37	zinc finger and BTB domain containing 37	0.560268	1.47454	3.30687e-06	1.75204e-05
16674020	RN5S67		1.89686	3.72403	6.59013e-11	8.26109e-10
16674025	RABGAP1L	RAB GTPase activating protein 1-like	-0.036625	-1.02571	0.603305	0.742501
16674080	GPR52	G protein-coupled receptor 52	-0.252013	-1.19087	0.0851601	0.17302
16674084	RABGAP1L-IT1		-0.196062	-1.14557	0.0552198	0.120224
16674089	CACYBP	calcyclin binding protein	0.305383	1.23575	0.000364468	0.00133843
16674106	TNN	tenascin N	-0.395643	-1.31553	1.16408e-06	6.67812e-06
16674130	KIAA0040		0.117428	1.0848	0.0486282	0.108116
16674139	LOC101928751	uncharacterized LOC101928751	0.0415967	1.02925	0.598299	0.738934
16674151	PAPPA2	pappalysin 2	0.054945	1.03882	0.508044	0.663897
16674185	BRINP2	bone morphogenetic protein/retinoic acid inducible neural-specific 2	0.0215883	1.01508	0.804905	0.887687
16674201	LOC102724661	uncharacterized LOC102724661	0.472143	1.38717	5.56608e-06	2.83654e-05
16674206	LOC101928778	uncharacterized LOC101928778	0.174127	1.12828	0.0441643	0.0996942
16674211	RASAL2	RAS protein activator like 2	1.82509	3.5433	8.60441e-17	3.47406e-15
16674240	TEX35	testis expressed 35	0.104057	1.07479	0.314606	0.477609
16674267	TEX35	testis expressed 35	-0.197718	-1.14688	0.0134691	0.0355357
16674269	TEX35	testis expressed 35	0.086005	1.06143	0.470825	0.630638
16674271	TEX35	testis expressed 35	0.0602667	1.04266	0.526355	0.68013
16674273	C1orf220	chromosome 1 open reading frame 220	0.196453	1.14588	0.0202154	0.0507676
16674283	RN5S69		-0.37276	-1.29483	0.00412572	0.0122164
16674287	MIR4424	microRNA 4424	0.272313	1.20774	0.0192767	0.0487181
16674292	RALGPS2	Ral GEF with PH domain and SH3 binding motif 2	-0.145728	-1.10629	0.0492822	0.109235
16674319	FAM20B	family with sequence similarity 20, member B	0.0851933	1.06083	0.195053	0.334349
16674330	TOR3A	torsin family 3, member A	-0.0745683	-1.05305	0.235723	0.385798
16674355	SOAT1	sterol O-acyltransferase 1	0.134525	1.09773	0.0453964	0.102004
16674375	AXDND1	axonemal dynein light chain domain containing 1	0.034385	1.02412	0.644009	0.774271
16674412	RNU5F-2P		0.101518	1.0729	0.419999	0.585511
16674414	TDRD5	tudor domain containing 5	0.0990733	1.07109	0.10176	0.199954
16674436	FAM163A	family with sequence similarity 163, member A	0.0148867	1.01037	0.816193	0.894836
16674440	FAM163A	family with sequence similarity 163, member A	0.0490467	1.03458	0.43507	0.599206
16674446	TOR1AIP2		0.236813	1.17839	0.00714042	0.0201194
16674449	TOR1AIP1	torsin A interacting protein 1	0.27385	1.20903	0.000983162	0.00332561
16674470	CEP350	centrosomal protein 350kDa	0.420715	1.33859	3.94177e-06	2.05841e-05
16674521	QSOX1		-0.526138	-1.44007	5.94314e-08	4.30766e-07
16674540	LHX4	LIM homeobox 4	0.0949833	1.06805	0.169056	0.299006
16674552	OVAAL	ovarian adenocarcinoma amplified long non-coding RNA	2.12216	4.35345	9.25526e-19	5.94351e-17
16674557	XPR1	xenotropic and polytropic retrovirus receptor 1	-0.254167	-1.19265	6.72702e-05	0.000282635
16674589	KIAA1614	KIAA1614	-0.0617883	-1.04376	0.482519	0.641371
16674604	MR1	major histocompatibility complex, class I-related	-0.002275	-1.00158	0.978596	0.988583
16674618	IER5	immediate early response 5	0.142998	1.1042	0.203055	0.344616
16674625	LOC101928973	uncharacterized LOC101928973	-0.0548933	-1.03878	0.399565	0.566303
16674629	GM140	uncharacterized LOC100287948	0.13593	1.0988	0.139592	0.257246
16674633	CACNA1E	calcium channel, voltage-dependent, R type, alpha 1E subunit	0.137202	1.09977	0.0249238	0.0609231
16674689	RN5S70		-0.145	-1.10573	0.231482	0.380486
16674700	LINC00272	long intergenic non-protein coding RNA 272	0.15306	1.11193	0.147955	0.269376
16674705	RGSL1	regulator of G-protein signaling like 1	-0.0154367	-1.01076	0.824573	0.8994
16674737	LOC284648	uncharacterized LOC284648	0.143938	1.10492	0.130083	0.243396
16674739	LOC105371644	uncharacterized LOC105371644	0.0411	1.0289	0.597385	0.738172
16674742	NPL	N-acetylneuraminate pyruvate lyase (dihydrodipicolinate synthase)	-0.186358	-1.13789	0.0404139	0.0924257
16674767	DHX9	DEAH (Asp-Glu-Ala-His) box helicase 9	0.0505867	1.03569	0.397305	0.56404
16674805	LAMC1	laminin, gamma 1 (formerly LAMB2)	-0.120487	-1.0871	0.0270554	0.0654253
16674845	LAMC2	laminin, gamma 2	0.219488	1.16432	0.0110395	0.0298145
16674880	SMG7	SMG7 nonsense mediated mRNA decay factor	0.00206167	1.00143	0.973831	0.985729
16674924	LOC100292409		0.0955683	1.06849	0.370025	0.536475
16674927	RGL1	ral guanine nucleotide dissociation stimulator-like 1	-0.205428	-1.15303	0.015871	0.0411045
16674953	TSEN15	TSEN15 tRNA splicing endonuclease subunit	0.02262	1.0158	0.736743	0.840812
16674973	C1orf21	chromosome 1 open reading frame 21	-1.85299	-3.61248	1.21383e-17	5.99808e-16
16674998	RNF2	ring finger protein 2	-0.15636	-1.11447	0.0367693	0.0852686
16675009	SWT1	SWT1 RNA endoribonuclease homolog	-0.432143	-1.34924	0.000135564	0.000539449
16675036	LOC102724897	uncharacterized LOC102724897	0.146435	1.10683	0.105433	0.205723
16675045	HMCN1	hemicentin 1	0.00915333	1.00636	0.874628	0.930163
16675158	PRG4	proteoglycan 4	0.051375	1.03625	0.442105	0.605841
16675174	C1orf27	chromosome 1 open reading frame 27	0.249038	1.18841	0.00120206	0.00399664
16675192	OCLM	oculomedin	0.235278	1.17713	0.0881415	0.177973
16675197	PLA2G4A	phospholipase A2, group IVA (cytosolic, calcium-dependent)	-0.704835	-1.62996	2.35961e-09	2.21098e-08
16675227	ERVMER61-1	endogenous retrovirus group MER61, member 1	0.0524517	1.03703	0.597916	0.7386
16675253	LINC01351	long intergenic non-protein coding RNA 1351	0.055095	1.03893	0.556633	0.705456
16675263	LOC440704	uncharacterized LOC440704	0.000711667	1.00049	0.992552	0.996281
16675278	RGS18	regulator of G-protein signaling 18	-2.16082	-4.4717	1.39512e-17	6.78145e-16
16675290	RGS21	regulator of G-protein signaling 21	0.051025	1.036	0.561234	0.709585
16675301	RGS1	regulator of G-protein signaling 1	0.253977	1.19249	0.00361738	0.0108492
16675312	RGS13	regulator of G-protein signaling 13	-0.802952	-1.74467	1.93972e-11	2.70842e-10
16675323	RGS2	regulator of G-protein signaling 2	0.54679	1.46083	9.1538e-06	4.48833e-05
16675334	TROVE2	TROVE domain family, member 2	0.509795	1.42385	8.03958e-08	5.66458e-07
16675354	CDC73	cell division cycle 73	-0.182547	-1.13489	0.00517034	0.0150215
16675376	MIR1278	microRNA 1278	0.0975633	1.06996	0.192544	0.33145
16675378	LINC01031	long intergenic non-protein coding RNA 1031	-0.0231483	-1.01617	0.785332	0.8739
16675398	CFH	complement factor H	-2.37432	-5.18492	7.35803e-21	7.97263e-19
16675428	CFHR3	complement factor H-related 3	-0.00683167	-1.00475	0.926921	0.959143
16675443	CFHR1		0.019245	1.01343	0.838757	0.908651
16675457	CFHR4	complement factor H-related 4	-0.0688567	-1.04889	0.338436	0.502986
16675472	CFHR2	complement factor H-related 2	0.177752	1.13112	0.27104	0.428626
16675481	CFHR5	complement factor H-related 5	-0.047875	-1.03374	0.566326	0.713674
16675495	CRB1	crumbs family member 1, photoreceptor morphogenesis associated	0.0636617	1.04511	0.341655	0.506508
16675533	C1orf53	chromosome 1 open reading frame 53	-0.302568	-1.23334	0.00222932	0.00700479
16675539	LHX9	LIM homeobox 9	-0.121478	-1.08785	0.0581079	0.125458
16675558	NEK7	NIMA-related kinase 7	-0.613793	-1.53028	9.37862e-10	9.5377e-09
16675578	PTPRC	protein tyrosine phosphatase, receptor type, C	-0.27854	-1.21297	0.000105328	0.000427526
16675631	LOC400800	uncharacterized LOC400800	-0.108572	-1.07816	0.203668	0.345363
16675638	NR5A2	nuclear receptor subfamily 5, group A, member 2	0.136167	1.09898	0.0588277	0.12681
16675660	FAM58BP		-0.151613	-1.11081	0.2212	0.36752
16675668	LOC101929224	uncharacterized LOC101929224	0.00417333	1.0029	0.963958	0.980343
16675673	CAMSAP2	calmodulin regulated spectrin-associated protein family, member 2	-0.372852	-1.29491	2.88228e-06	1.54023e-05
16675695	GPR25	G protein-coupled receptor 25	-0.398663	-1.31829	0.000119545	0.000480453
16675698	C1orf106	chromosome 1 open reading frame 106	0.529678	1.44361	5.83896e-09	5.09468e-08
16675723	LOC101929305	uncharacterized LOC101929305	0.421708	1.33951	1.7376e-05	8.12542e-05
16675731	IGFN1	immunoglobulin-like and fibronectin type III domain containing 1	0.055855	1.03947	0.472357	0.631951
16675763	PKP1	plakophilin 1	0.168057	1.12354	0.0117681	0.0315877
16675784	CSRP1		-0.486063	-1.40062	1.48392e-06	8.36639e-06
16675787	RPS10P7	ribosomal protein S10 pseudogene 7	-0.222757	-1.16696	0.0135296	0.0356668
16675794	NAV1	neuron navigator 1	-1.73628	-3.33175	7.28824e-19	4.80387e-17
16675842	MIR1231	microRNA 1231	0.00987833	1.00687	0.947328	0.97102
16675844	IPO9	importin 9	-0.139483	-1.10151	0.0106883	0.0289737
16675874	SHISA4	shisa family member 4	-0.0359517	-1.02523	0.581925	0.726662
16675884	LMOD1	leiomodin 1 (smooth muscle)	-0.152177	-1.11124	0.0759521	0.157026
16675889	TIMM17A	translocase of inner mitochondrial membrane 17 homolog A (yeast)	0.166942	1.12268	0.0535739	0.117214
16675903	RNPEP	arginyl aminopeptidase (aminopeptidase B)	0.654448	1.57401	1.31977e-10	1.56425e-09
16675922	LOC100506636		0.949357	1.93101	2.90384e-11	3.91519e-10
16675924	ELF3	E74-like factor 3 (ets domain transcription factor, epithelial-specific )	-0.0461817	-1.03253	0.434306	0.598788
16675944	GPR37L1	G protein-coupled receptor 37 like 1	0.13529	1.09831	0.113405	0.218065
16675952	PTPRVP	protein tyrosine phosphatase, receptor type, V, pseudogene	0.311288	1.24082	5.639e-05	0.000239831
16675975	LGR6	leucine-rich repeat containing G protein-coupled receptor 6	0.079855	1.05691	0.380117	0.546507
16676008	PPP1R12B	protein phosphatase 1, regulatory subunit 12B	0.314727	1.24378	0.0193088	0.0487779
16676055	PCAT6	prostate cancer associated transcript 6 (non-protein coding)	-0.474963	-1.38988	9.67716e-06	4.72706e-05
16676060	LOC641515		-0.099915	-1.07171	0.0928992	0.185717
16676067	LOC148709	actin pseudogene	-0.586175	-1.50126	1.15852e-06	6.64877e-06
16676071	TMEM183B		0.503802	1.41795	0.000173778	0.000677578
16676086	PPFIA4	protein tyrosine phosphatase, receptor type, f polypeptide (PTPRF), interacting protein (liprin), alpha 4	0.224802	1.16862	0.00507391	0.0147629
16676130	ADORA1		0.0491233	1.03464	0.634508	0.766871
16676144	LINC01353	long intergenic non-protein coding RNA 1353	0.016625	1.01159	0.816383	0.894922
16676150	BTG2	BTG family, member 2	-0.295528	-1.22733	0.0018188	0.00582112
16676167	PRELP	proline/arginine-rich end leucine-rich repeat protein	-0.0268733	-1.0188	0.689058	0.806626
16676172	OPTC	opticin	0.0690067	1.04899	0.218471	0.363878
16676183	ATP2B4	ATPase, Ca++ transporting, plasma membrane 4	-0.51263	-1.42665	1.66292e-08	1.33379e-07
16676215	SNORA77	small nucleolar RNA, H/ACA box 77	-0.186628	-1.1381	0.0992852	0.196115
16676217	LAX1	lymphocyte transmembrane adaptor 1	-2.19251	-4.57101	1.09049e-19	8.5734e-18
16676228	ZC3H11A		0.05946	1.04208	0.307715	0.47006
16676258	ZBED6	zinc finger, BED-type containing 6	0.179668	1.13262	0.0653794	0.138527
16676263	ZBED6		0.401308	1.32071	5.54087e-05	0.000236332
16676265	SNRPE	small nuclear ribonucleoprotein polypeptide E	0.225873	1.16948	0.0218594	0.054363
16676277	SOX13	SRY (sex determining region Y)-box 13	-1.55755	-2.94354	4.8934e-16	1.65525e-14
16676301	LOC101929441	uncharacterized LOC101929441	0.213132	1.1592	0.0224469	0.0556031
16676308	LOC100506838		-0.0109967	-1.00765	0.889706	0.938926
16676314	MDM4	MDM4, p53 regulator	0.766828	1.70152	4.58259e-09	4.06633e-08
16676343	MDM4	MDM4, p53 regulator	-0.01945	-1.01357	0.802538	0.8862
16676347	LOC105371692	uncharacterized LOC105371692	-0.00286	-1.00198	0.957244	0.976809
16676355	NFASC	neurofascin	0.0249783	1.01746	0.665509	0.790016
16676405	CNTN2	contactin 2 (axonal)	0.00816	1.00567	0.894434	0.941854
16676437	TMCC2	transmembrane and coiled-coil domain family 2	-0.35435	-1.27841	0.000164237	0.000643536
16676453	LEMD1-AS1	LEMD1 antisense RNA 1	0.10434	1.075	0.115648	0.221463
16676457	LOC284577	uncharacterized LOC284577	0.092145	1.06595	0.227776	0.375847
16676461	CDK18	cyclin-dependent kinase 18	-0.120457	-1.08708	0.116121	0.222241
16676498	MFSD4	major facilitator superfamily domain containing 4	-0.0248417	-1.01737	0.75581	0.854226
16676515	NUCKS1	nuclear casein kinase and cyclin-dependent kinase substrate 1	-0.3477	-1.27253	0.00602024	0.0172519
16676523	LOC103021296	uncharacterized LOC103021296	0.064735	1.04589	0.358196	0.524325
16676526	FAM72A		0.107603	1.07744	0.204565	0.346351
16676539	FAM72C	family with sequence similarity 72, member C	-0.0149433	-1.01041	0.826516	0.900727
16676542	AVPR1B	arginine vasopressin receptor 1B	-0.0555283	-1.03924	0.450787	0.61287
16676547	CTSE	cathepsin E	0.837218	1.7866	7.70242e-09	6.59319e-08
16676562	SRGAP2		0.207572	1.15474	0.00787623	0.0220096
16676589	SRGAP2-IT1		0.1598	1.11713	0.086861	0.175783
16676592	IKBKE	inhibitor of kappa light polypeptide gene enhancer in B-cells, kinase epsilon	-0.343215	-1.26858	0.000182733	0.000709341
16676619	RASSF5	Ras association (RalGDS/AF-6) domain family member 5	0.336482	1.26267	6.06374e-06	3.07124e-05
16676633	DYRK3	dual-specificity tyrosine-(Y)-phosphorylation regulated kinase 3	0.083075	1.05927	0.293222	0.454114
16676643	MAPKAPK2	mitogen-activated protein kinase-activated protein kinase 2	1.26024	2.39536	2.78914e-13	5.54794e-12
16676661	IL19	interleukin 19	0.0662517	1.04699	0.489049	0.647221
16676673	IL20	interleukin 20	0.07288	1.05181	0.318099	0.481211
16676682	IL24	interleukin 24	-0.124577	-1.09019	0.0799759	0.164189
16676693	PFKFB2	6-phosphofructo-2-kinase/fructose-2,6-biphosphatase 2	-0.263422	-1.20032	0.00183269	0.00586119
16676720	C4BPB	complement component 4 binding protein, beta	0.247782	1.18738	0.00239798	0.00748194
16676738	C4BPA	complement component 4 binding protein, alpha	-0.0088	-1.00612	0.92758	0.959658
16676764	CD55	CD55 molecule, decay accelerating factor for complement (Cromer blood group)	0.37414	1.29607	1.35064e-05	6.44334e-05
16676795	CR2	complement component (3d/Epstein Barr virus) receptor 2	-0.0721517	-1.05128	0.235778	0.385845
16676819	CR1	complement component (3b/4b) receptor 1 (Knops blood group)	0.0949233	1.06801	0.374675	0.541141
16676873	CR1L	complement component (3b/4b) receptor 1-like	0.0758233	1.05396	0.361404	0.527829
16676893	CD46	CD46 molecule, complement regulatory protein	0.253378	1.192	0.00210273	0.00664352
16676919	LOC148696	uncharacterized LOC148696	0.0351933	1.02469	0.595955	0.737169
16676947	LOC101929476	uncharacterized LOC101929476	0.0883883	1.06318	0.190425	0.32859
16676954	MIR205		-0.0227167	-1.01587	0.693635	0.810138
16676965	CAMK1G	calcium/calmodulin-dependent protein kinase IG	0.0831017	1.05929	0.329311	0.49304
16676983	G0S2	G0/G1 switch 2	-0.0384533	-1.02701	0.554349	0.703729
16676988	HSD11B1	hydroxysteroid (11-beta) dehydrogenase 1	1.39825	2.63582	2.58207e-15	7.51346e-14
16676999	TRAF3IP3	TRAF3 interacting protein 3	-0.425003	-1.34258	6.25317e-05	0.000263992
16677037	DIEXF	digestive organ expansion factor homolog (zebrafish)	0.446305	1.36255	4.0997e-07	2.54869e-06
16677057	SYT14	synaptotagmin XIV	0.02378	1.01662	0.771877	0.865461
16677071	SERTAD4	SERTA domain containing 4	0.010805	1.00752	0.894928	0.942101
16677082	HHAT	hedgehog acyltransferase	0.0398817	1.02803	0.655975	0.782673
16677104	RCOR3	REST corepressor 3	-0.102277	-1.07347	0.129889	0.243108
16677133	TRAF5	TNF receptor-associated factor 5	-2.33496	-5.04536	2.11713e-21	2.73263e-19
16677153	LINC00467	long intergenic non-protein coding RNA 467	0.0952717	1.06827	0.118642	0.226106
16677167	LOC100653135		0.10496	1.07546	0.154551	0.27883
16677172	LOC91548	uncharacterized LOC91548	0.0771133	1.05491	0.240078	0.391357
16677201	DTL	denticleless E3 ubiquitin protein ligase homolog (Drosophila)	0.399992	1.3195	4.51821e-07	2.78966e-06
16677221	MIR3122	microRNA 3122	0.300917	1.23193	0.0108952	0.0294679
16677228	PPP2R5A	protein phosphatase 2, regulatory subunit B', alpha	-0.05812	-1.04111	0.384637	0.551223
16677254	SNORA16B	small nucleolar RNA, H/ACA box 16B	-0.0761583	-1.05421	0.554062	0.703487
16677259	NENF	neudesin neurotrophic factor	-0.587328	-1.50246	2.56223e-06	1.38209e-05
16677266	LOC101929565	uncharacterized LOC101929565	0.168433	1.12384	0.0841372	0.171246
16677278	ATF3	activating transcription factor 3	0.529012	1.44294	1.971e-06	1.08518e-05
16677292	FAM71A	family with sequence similarity 71, member A	-0.0784817	-1.05591	0.307038	0.469266
16677304	TATDN3	TatD DNase domain containing 3	0.844193	1.79526	3.0592e-12	4.98657e-11
16677324	FLVCR1	feline leukemia virus subgroup C cellular receptor 1	0.158007	1.11574	0.0167897	0.0431537
16677339	VASH2	vasohibin 2	-0.002745	-1.0019	0.968614	0.983093
16677361	RPS6KC1	ribosomal protein S6 kinase, 52kDa, polypeptide 1	-0.10921	-1.07864	0.231619	0.380608
16677391	PROX1	prospero homeobox 1	0.03704	1.02601	0.527243	0.680816
16677404	PROX1-IT1		-0.0633733	-1.04491	0.483734	0.642213
16677407	SMYD2	SET and MYND domain containing 2	0.247427	1.18709	8.2732e-05	0.000342004
16677425	CENPF	centromere protein F, 350/400kDa	0.0618717	1.04382	0.348581	0.513759
16677451	KCNK2	potassium channel, two pore domain subfamily K, member 2	0.0530833	1.03748	0.465077	0.625558
16677473	KCTD3	potassium channel tetramerization domain containing 3	0.468732	1.38389	4.49286e-07	2.77628e-06
16677500	LOC102723833	uncharacterized LOC102723833	0.0832283	1.05939	0.19518	0.334548
16677514	SPATA17	spermatogenesis associated 17	0.265997	1.20247	0.000144529	0.000572296
16677530	LINC00210	long intergenic non-protein coding RNA 210	-0.141073	-1.10273	0.149171	0.271061
16677538	LOC101929631	uncharacterized LOC101929631	-0.0700133	-1.04973	0.457341	0.618667
16677547	RRP15	ribosomal RNA processing 15 homolog	-0.000423333	-1.00029	0.993625	0.996716
16677556	TGFB2	transforming growth factor, beta 2	-0.069065	-1.04904	0.379593	0.545937
16677569	C1orf143		-0.017115	-1.01193	0.823666	0.898884
16677580	LYPLAL1	lysophospholipase-like 1	0.329925	1.25695	0.000108309	0.000438489
16677604	LOC101929713	uncharacterized LOC101929713	-0.0863283	-1.06166	0.200971	0.341706
16677612	RN5S76		-0.141415	-1.10299	0.0698584	0.146579
16677616	IARS2	isoleucyl-tRNA synthetase 2, mitochondrial	-0.040715	-1.02862	0.531228	0.683826
16677655	MARK1	MAP/microtubule affinity-regulating kinase 1	0.609502	1.52573	2.22804e-09	2.10025e-08
16677678	C1orf115	chromosome 1 open reading frame 115	0.0323317	1.02266	0.674692	0.796347
16677683	MARC2	mitochondrial amidoxime reducing component 2	1.20703	2.30861	1.65396e-14	4.11722e-13
16677698	MARC1	mitochondrial amidoxime reducing component 1	0.0584933	1.04138	0.525913	0.679736
16677718	LINC01352	long intergenic non-protein coding RNA 1352	0.217083	1.16238	0.00156448	0.00508584
16677723	HLX	H2.0-like homeobox	0.215013	1.16071	0.00142203	0.00465423
16677743	TAF1A-AS1	TAF1A antisense RNA 1	-0.224357	-1.16826	0.00550355	0.0159028
16677748	MIA3	melanoma inhibitory activity family, member 3	0.291088	1.22356	1.61325e-05	7.59401e-05
16677789	BROX	BRO1 domain and CAAX motif containing	-0.148802	-1.10865	0.0098695	0.0269552
16677808	FAM177B	family with sequence similarity 177, member B	0.000241667	1.00017	0.997486	0.998522
16677823	DISP1	dispatched homolog 1 (Drosophila)	-0.139418	-1.10146	0.111862	0.215774
16677859	CCDC185	coiled-coil domain containing 185	0.135195	1.09824	0.162419	0.289901
16677863	CAPN2	calpain 2, (m/II) large subunit	-0.568863	-1.48335	1.14608e-09	1.14481e-08
16677904	FBXO28	F-box protein 28	0.519503	1.43346	2.57918e-06	1.39091e-05
16677913	DEGS1	delta(4)-desaturase, sphingolipid 1	-0.534998	-1.44894	2.62036e-08	2.02382e-07
16677925	LOC101927164	uncharacterized LOC101927164	0.11867	1.08573	0.140773	0.258788
16677933	CNIH4	cornichon family AMPA receptor auxiliary protein 4	0.151353	1.11061	0.0348903	0.0815727
16677944	CNIH3	cornichon family AMPA receptor auxiliary protein 3	-0.16662	-1.12243	0.0219459	0.0545298
16677977	DNAH14	dynein, axonemal, heavy chain 14	-0.261303	-1.19856	0.0055469	0.0160175
16678095	LOC102723834	uncharacterized LOC102723834	0.09285	1.06647	0.25382	0.407934
16678105	SRP9	signal recognition particle 9kDa	0.13518	1.09823	0.0575797	0.124507
16678114	EPHX1	epoxide hydrolase 1, microsomal (xenobiotic)	0.298488	1.22986	0.00297779	0.0090883
16678128	H3F3B		0.38378	1.30476	0.00659475	0.0187378
16678139	LOC105373113	uncharacterized LOC105373113	0.115003	1.08298	0.197279	0.337041
16678149	MIXL1	Mix paired-like homeobox	-0.0631683	-1.04476	0.411323	0.577223
16678159	C1orf95	chromosome 1 open reading frame 95	0.0502617	1.03545	0.595623	0.736816
16678166	ITPKB-AS1		0.0114833	1.00799	0.877335	0.931877
16678169	PSEN2	presenilin 2	-0.84913	-1.80141	2.58623e-12	4.28598e-11
16678191	ADCK3	aarF domain containing kinase 3	0.437345	1.35411	4.66962e-06	2.40978e-05
16678245	RN5S77		-0.0667467	-1.04735	0.268029	0.424766
16678247	ZNF678	zinc finger protein 678	1.71413	3.28099	2.08967e-14	5.09958e-13
16678257	LOC100130093		0.01647	1.01148	0.855597	0.919019
16678262	SNAP47		0.135195	1.09824	0.0461998	0.103505
16678281	PRSS38	protease, serine, 38	-0.0332983	-1.02335	0.670669	0.793352
16678295	WNT3A	wingless-type MMTV integration site family, member 3A	-0.00527333	-1.00366	0.938681	0.966304
16678303	ARF1		0.201977	1.15027	0.00312777	0.00949742
16678320	MIR3620		-0.168208	-1.12366	0.129302	0.242274
16678322	GUK1	guanylate kinase 1	0.033415	1.02343	0.630975	0.763964
16678349	GJC2	gap junction protein, gamma 2, 47kDa	-0.042975	-1.03024	0.55805	0.706621
16678353	IBA57	IBA57 homolog, iron-sulfur cluster assembly	0.103482	1.07436	0.193447	0.332591
16678361	OBSCN	obscurin, cytoskeletal calmodulin and titin-interacting RhoGEF	-0.060065	-1.04251	0.299458	0.461158
16678489	OBSCN	obscurin, cytoskeletal calmodulin and titin-interacting RhoGEF	-0.186805	-1.13824	0.0354959	0.0827663
16678496	HIST3H2BB	histone cluster 3, H2bb	0.0380083	1.0267	0.701588	0.815878
16678499	MIR4666A	microRNA 4666a	0.0878333	1.06277	0.265638	0.421897
16678501	RNF187	ring finger protein 187	-0.195992	-1.14551	0.00264369	0.00816735
16678516	RN5S19		-0.221595	-1.16602	0.0875687	0.176985
16678518	RHOU		-0.364505	-1.28744	3.12631e-05	0.000139956
16678532	TMEM78	transmembrane protein 78	-0.142332	-1.10369	0.0465849	0.104282
16678536	SPHAR		0.377232	1.29885	6.56084e-06	3.30113e-05
16678555	LOC101927478	uncharacterized LOC101927478	0.010025	1.00697	0.904969	0.947683
16678559	RN5S78		0.386805	1.30749	0.0001803	0.000701356
16678561	URB2	URB2 ribosome biogenesis 2 homolog (S. cerevisiae)	0.0510533	1.03602	0.422216	0.587721
16678574	LOC101927532	uncharacterized LOC101927532	0.0863867	1.06171	0.170374	0.301016
16678579	GALNT2	polypeptide N-acetylgalactosaminyltransferase 2	-0.971485	-1.96086	6.30141e-13	1.16696e-11
16678611	COG2	component of oligomeric golgi complex 2	0.158888	1.11643	0.00608003	0.0174092
16678651	CAPN9	calpain 9	0.01154	1.00803	0.880225	0.933682
16678674	RN5S79		0.106578	1.07667	0.246613	0.399192
16678676	LOC101927604	uncharacterized LOC101927604	-0.147793	-1.10787	0.140616	0.258703
16678680	ARV1	ARV1 homolog, fatty acid homeostasis modulator	0.0173583	1.0121	0.782163	0.871647
16678691	TRIM67	tripartite motif containing 67	0.06075	1.04301	0.3804	0.546729
16678710	GNPAT	glyceronephosphate O-acyltransferase	0.210942	1.15744	0.00103608	0.0034943
16678738	SPRTN	SprT-like N-terminal domain	-0.0163617	-1.01141	0.830092	0.90309
16678752	TSNAX-DISC1		0.42357	1.34124	4.7095e-05	0.000203729
16678801	RNU5A-5P		0.105508	1.07587	0.243988	0.39606
16678803	DISC1-IT1		0.197407	1.14664	0.0892453	0.179727
16678824	MAP10	microtubule-associated protein 10	-0.600165	-1.51589	1.58182e-08	1.27698e-07
16678828	LOC101927711	uncharacterized LOC101927711	0.06334	1.04488	0.330346	0.493995
16678838	NTPCR	nucleoside-triphosphatase, cancer-related	-0.330812	-1.25772	0.000201699	0.000777147
16678851	KIAA1804	mixed lineage kinase 4	0.780132	1.71729	1.99913e-11	2.78355e-10
16678867	KCNK1	potassium channel, two pore domain subfamily K, member 1	0.0565783	1.04	0.343696	0.508542
16678880	MIR4427	microRNA 4427	0.058685	1.04152	0.424908	0.589993
16678886	SLC35F3	solute carrier family 35, member F3	0.19839	1.14742	0.015738	0.040799
16678902	MIR4671	microRNA 4671	-0.0152633	-1.01064	0.756877	0.85498
16678907	C1orf31		0.19336	1.14342	0.0432367	0.0979341
16678922	LINC00184	long intergenic non-protein coding RNA 184	-0.00934	-1.00649	0.91518	0.95308
16678925	LOC101927787	uncharacterized LOC101927787	0.111418	1.08029	0.185323	0.321743
16678946	LINC01132	long intergenic non-protein coding RNA 1132	-0.098955	-1.071	0.137932	0.25474
16678949	RNY4P16		0.16925	1.12447	0.169783	0.300008
16678954	GGPS1	geranylgeranyl diphosphate synthase 1	0.0646383	1.04582	0.470252	0.63021
16678966	TBCE	tubulin folding cofactor E	0.150598	1.11003	0.10832	0.210254
16679003	GPR137B	G protein-coupled receptor 137B	1.18746	2.27752	4.37575e-15	1.21175e-13
16679020	EDARADD	EDAR-associated death domain	0.149095	1.10887	0.0328138	0.0773906
16679033	LGALS8	lectin, galactoside-binding, soluble, 8	0.0646683	1.04584	0.38676	0.553281
16679064	ACTN2	actinin, alpha 2	0.0244417	1.01709	0.781703	0.871401
16679094	MTR	5-methyltetrahydrofolate-homocysteine methyltransferase	0.0152033	1.01059	0.802125	0.885895
16679142	RYR2	ryanodine receptor 2 (cardiac)	-1.69182	-3.23065	1.65225e-16	6.33883e-15
16679257	LOC100130331	POTE ankyrin domain family, member F pseudogene	0.0872067	1.06231	0.174361	0.306425
16679276	LOC105373221	uncharacterized LOC105373221	0.0385667	1.02709	0.561102	0.709461
16679281	CHRM3	cholinergic receptor, muscarinic 3	-2.02928	-4.08201	8.80069e-21	9.29909e-19
16679298	RPS7P5	ribosomal protein S7 pseudogene 5	0.142315	1.10367	0.178746	0.312583
16679301	FMN2	formin 2	-1.03711	-2.05212	8.25304e-13	1.49857e-11
16679336	RNU5F-8P		0.017005	1.01186	0.813794	0.893365
16679343	MIR3123	microRNA 3123	0.0273933	1.01917	0.755388	0.853998
16679349	KMO	kynurenine 3-monooxygenase (kynurenine 3-hydroxylase)	0.490392	1.40483	5.39362e-05	0.000230612
16679375	WDR64	WD repeat domain 64	-0.0499783	-1.03525	0.42598	0.591083
16679411	EXO1	exonuclease 1	0.473152	1.38814	2.17101e-07	1.41708e-06
16679438	RN5S81		-0.0321283	-1.02252	0.682729	0.802527
16679451	SDCCAG8	serologically defined colon cancer antigen 8	0.158315	1.11598	0.0336162	0.0790579
16679480	MIR4677	microRNA 4677	0.339253	1.2651	0.108124	0.209997
16679486	LOC339529	uncharacterized LOC339529	-0.017865	-1.01246	0.831288	0.904125
16679499	ZBTB18	zinc finger and BTB domain containing 18	0.111163	1.0801	0.225313	0.372897
16679509	C1orf100	chromosome 1 open reading frame 100	-0.0940117	-1.06733	0.331291	0.495111
16679517	C1orf101	chromosome 1 open reading frame 101	0.0142917	1.00996	0.847926	0.914395
16679546	DESI2	desumoylating isopeptidase 2	-0.272712	-1.20808	0.000523162	0.00186735
16679557	COX20	COX20 cytochrome c oxidase assembly factor	0.169705	1.12483	0.0268392	0.0649446
16679569	EFCAB2	EF-hand calcium binding domain 2	0.852832	1.80604	1.9347e-10	2.21383e-09
16679596	KIF26B	kinesin family member 26B	0.944233	1.92417	3.84954e-11	5.0687e-10
16679622	LOC101928089	uncharacterized LOC101928089	-0.0864617	-1.06176	0.412039	0.577902
16679627	CNST	consortin, connexin sorting protein	-0.269755	-1.2056	8.388e-05	0.000346317
16679643	LOC101928139	uncharacterized LOC101928139	-0.29262	-1.22486	0.00189987	0.00606237
16679646	LOC102724382	uncharacterized LOC102724382	-0.28643	-1.21962	0.00651123	0.018527
16679650	SCCPDH	saccharopine dehydrogenase (putative)	-1.69498	-3.23772	7.13829e-20	5.85949e-18
16679665	LINC01341	long intergenic non-protein coding RNA 1341	-0.443403	-1.35981	5.87994e-06	2.98373e-05
16679684	VN1R5	vomeronasal 1 receptor 5 (gene/pseudogene)	0.209985	1.15668	0.0090801	0.0250055
16679697	NLRP3	NLR family, pyrin domain containing 3	0.708038	1.63358	1.14826e-09	1.1466e-08
16679715	OR2W5	olfactory receptor, family 2, subfamily W, member 5 (gene/pseudogene)	0.0739283	1.05258	0.361766	0.528176
16679717	GCSAML	germinal center-associated, signaling and motility-like	-2.02265	-4.06331	1.93867e-19	1.42282e-17
16679731	OR2G2	olfactory receptor, family 2, subfamily G, member 2	-0.31028	-1.23995	0.00531031	0.0153906
16679733	OR2G3	olfactory receptor, family 2, subfamily G, member 3	-0.07369	-1.0524	0.486809	0.64526
16679740	OR14K1		0.00164333	1.00114	0.981118	0.989849
16679742	TRIM58	tripartite motif containing 58	-1.34879	-2.54698	2.68983e-17	1.22928e-15
16679753	OR2W3		-0.891622	-1.85526	1.52099e-10	1.78149e-09
16679755	OR2T8	olfactory receptor, family 2, subfamily T, member 8	-0.59894	-1.5146	1.45218e-05	6.88692e-05
16679757	OR2AJ1		-0.0349767	-1.02454	0.753614	0.852929
16679759	OR2L13	olfactory receptor, family 2, subfamily L, member 13	0.156138	1.1143	0.0387885	0.0892427
16679764	OR2L8	olfactory receptor, family 2, subfamily L, member 8 (gene/pseudogene)	-0.8827	-1.84382	1.06498e-06	6.15105e-06
16679766	OR2AK2	olfactory receptor, family 2, subfamily AK, member 2	-1.09096	-2.13016	5.46842e-08	3.9849e-07
16679769	OR2L1P	olfactory receptor, family 2, subfamily L, member 1 pseudogene	-1.16395	-2.2407	2.49582e-12	4.14538e-11
16679773	OR2L5	olfactory receptor, family 2, subfamily L, member 5	-0.452612	-1.36852	5.63091e-05	0.000239555
16679777	OR2L2	olfactory receptor, family 2, subfamily L, member 2	-0.762978	-1.69699	4.30597e-07	2.66636e-06
16679783	OR2L3	olfactory receptor, family 2, subfamily L, member 3	-0.02349	-1.01642	0.86541	0.924744
16679785	OR2M1P	olfactory receptor, family 2, subfamily M, member 1 pseudogene	0.21179	1.15812	0.0855052	0.173639
16679787	OR2M5	olfactory receptor, family 2, subfamily M, member 5	-0.0264517	-1.0185	0.83666	0.907435
16679789	OR2M2	olfactory receptor, family 2, subfamily M, member 2	0.20117	1.14963	0.118803	0.226378
16679791	OR2M3	olfactory receptor, family 2, subfamily M, member 3	0.000261667	1.00018	0.997679	0.99855
16679795	OR2M4	olfactory receptor, family 2, subfamily M, member 4	-0.108147	-1.07784	0.192125	0.330891
16679797	OR14C36	olfactory receptor, family 14, subfamily C, member 36	-0.0798783	-1.05693	0.378507	0.544901
16679799	OR2T4	olfactory receptor, family 2, subfamily T, member 4	0.0691633	1.04911	0.460027	0.621369
16679801	OR2T6	olfactory receptor, family 2, subfamily T, member 6	0.00460833	1.0032	0.955556	0.975794
16679803	OR2T1	olfactory receptor, family 2, subfamily T, member 1	-0.0290083	-1.02031	0.688921	0.806619
16679805	OR2T2	olfactory receptor, family 2, subfamily T, member 2	-0.13131	-1.09529	0.115506	0.221233
16679808	OR2T3	olfactory receptor, family 2, subfamily T, member 3	0.0798917	1.05694	0.436504	0.600399
16679811	OR2T5	olfactory receptor, family 2, subfamily T, member 5	0.0755317	1.05375	0.27919	0.437889
16679816	OR2G6	olfactory receptor, family 2, subfamily G, member 6	0.128792	1.09338	0.101024	0.198878
16679825	LOC101928226	uncharacterized LOC101928226	0.0718967	1.0511	0.547311	0.697557
16679830	MIR3124	microRNA 3124	0.09699	1.06954	0.353144	0.518509
16679832	ZNF672	zinc finger protein 672	-0.336247	-1.26247	0.000182634	0.000709048
16679851	PGBD2	piggyBac transposable element derived 2	-0.168233	-1.12368	0.0441141	0.0995959
16679860	WASH7P		0.0513	1.0362	0.465426	0.625855
16679871	FAM138A		0.284528	1.21801	0.00363723	0.0108989
16679876	LOC728323	uncharacterized LOC728323	0.297815	1.22928	0.0542058	0.118397
16679887	LOC729737	uncharacterized LOC729737	-1.10114	-2.14524	9.82364e-11	1.19329e-09
16679892	LOC101929823	uncharacterized LOC101929823	-0.662435	-1.58275	2.65859e-07	1.70839e-06
16679899	LOC100653348		-0.531797	-1.44573	1.69529e-06	9.45968e-06
16679907	LOC100508047		0.0197867	1.01381	0.816642	0.895074
16679923	LOC101929823	uncharacterized LOC101929823	-1.4944	-2.81747	3.66356e-12	5.85325e-11
16679932	LOC101928626	uncharacterized LOC101928626	-0.210715	-1.15726	0.0522288	0.114785
16679938	OR4F29		-0.072165	-1.05129	0.567089	0.714242
16679945	LOC101929823	uncharacterized LOC101929823	-0.498125	-1.41238	4.2895e-06	2.22789e-05
16679952	LOC100288069		-0.441367	-1.35789	1.28226e-06	7.30683e-06
16679970	LINC00115	long intergenic non-protein coding RNA 115	0.07732	1.05506	0.381774	0.548254
16679972	FAM41C	family with sequence similarity 41, member C	-0.40011	-1.31961	2.92184e-05	0.000131573
16679986	LOC100130417	uncharacterized LOC100130417	0.108188	1.07787	0.11157	0.215301
16679994	NOC2L	NOC2-like nucleolar associated transcriptional repressor	-0.179383	-1.1324	0.134657	0.249955
16680017	PERM1	PPARGC1 and ESRR induced regulator, muscle 1	-0.0848217	-1.06056	0.35441	0.519856
16680023	HES4	hes family bHLH transcription factor 4	0.0949217	1.06801	0.234105	0.383783
16680034	RNF223	ring finger protein 223	0.107153	1.0771	0.182303	0.317516
16680038	C1orf159	chromosome 1 open reading frame 159	0.0455283	1.03206	0.515728	0.670587
16680072	TTLL10-AS1	TTLL10 antisense RNA 1	-0.871267	-1.82927	1.15258e-10	1.38426e-09
16680075	TNFRSF18	tumor necrosis factor receptor superfamily, member 18	-1.0399	-2.05608	3.47323e-12	5.57307e-11
16680085	TNFRSF4	tumor necrosis factor receptor superfamily, member 4	-0.120683	-1.08725	0.127941	0.240082
16680098	SDF4	stromal cell derived factor 4	-0.328762	-1.25593	6.32003e-05	0.000266701
16680113	FAM132A	family with sequence similarity 132, member A	-0.001665	-1.00115	0.988125	0.993681
16680127	UBE2J2	ubiquitin-conjugating enzyme E2, J2	0.00528167	1.00367	0.927034	0.95922
16680148	ACAP3	ArfGAP with coiled-coil, ankyrin repeat and PH domains 3	0.0139833	1.00974	0.835011	0.90638
16680184	CPSF3L		0.054	1.03814	0.485289	0.643628
16680236	DVL1	dishevelled segment polarity protein 1	0.0907417	1.06492	0.156293	0.281462
16680258	MXRA8	matrix-remodelling associated 8	0.097295	1.06977	0.232011	0.381083
16680274	AURKAIP1	aurora kinase A interacting protein 1	0.172847	1.12728	0.0109992	0.0297193
16680284	CCNL2	cyclin L2	0.010565	1.00735	0.907927	0.949345
16680309	MRPL20	mitochondrial ribosomal protein L20	0.0133633	1.00931	0.870086	0.927719
16680323	ANKRD65	ankyrin repeat domain 65	0.075585	1.05379	0.477851	0.637019
16680334	LOC102724312	uncharacterized LOC102724312	-0.0453817	-1.03196	0.647504	0.77675
16680337	LOC102724312	uncharacterized LOC102724312	0.0434333	1.03056	0.573994	0.720031
16680342	TMEM240	transmembrane protein 240	0.061215	1.04334	0.4038	0.570022
16680348	SSU72	SSU72 homolog, RNA polymerase II CTD phosphatase	-0.179668	-1.13262	0.00610556	0.0174678
16680362	C1orf233	chromosome 1 open reading frame 233	0.131318	1.09529	0.104166	0.203743
16680365	CDK11A		0.202963	1.15106	0.0161354	0.0416915
16680420	SLC35E2B	solute carrier family 35, member E2B	-0.0396833	-1.02789	0.685828	0.804235
16680435	SLC35E2	solute carrier family 35, member E2	0.659658	1.57971	2.10989e-06	1.15716e-05
16680446	NADK	NAD kinase	-0.0466567	-1.03287	0.46235	0.623373
16680478	GNB1	guanine nucleotide binding protein (G protein), beta polypeptide 1	-0.504855	-1.41898	6.56469e-06	3.30252e-05
16680499	TMEM52	transmembrane protein 52	0.051045	1.03602	0.53807	0.689616
16680510	CFAP74	cilia and flagella associated protein 74	0.0346983	1.02434	0.601225	0.741247
16680559	LOC105378589	uncharacterized LOC105378589	0.0758433	1.05398	0.353527	0.51897
16680568	LOC100506504	uncharacterized LOC100506504	-0.341172	-1.26678	2.76226e-05	0.000124859
16680575	FAAP20	Fanconi anemia core complex associated protein 20	-0.176757	-1.13034	0.00655529	0.0186417
16680608	MORN1	MORN repeat containing 1	0.08289	1.05914	0.395508	0.562367
16680634	LOC100129534	small nuclear ribonucleoprotein polypeptide N pseudogene	0.256682	1.19473	0.00633673	0.0180685
16680636	PEX10	peroxisomal biogenesis factor 10	0.0941383	1.06743	0.217532	0.362863
16680657	PANK4	pantothenate kinase 4	-0.239802	-1.18083	0.0014584	0.00476752
16680690	HES5	hes family bHLH transcription factor 5	-0.066925	-1.04748	0.367044	0.533555
16680695	LOC115110	uncharacterized LOC115110	-0.102932	-1.07395	0.13592	0.251823
16680705	LOC115110	uncharacterized LOC115110	-0.0213883	-1.01494	0.739034	0.842328
16680717	MMEL1	membrane metallo-endopeptidase-like 1	0.102033	1.07329	0.190535	0.328663
16680752	TTC34	tetratricopeptide repeat domain 34	-0.000351667	-1.00024	0.997335	0.998441
16680770	LINC00982	long intergenic non-protein coding RNA 982	-0.0739217	-1.05257	0.303823	0.466023
16680790	MEGF6	multiple EGF-like-domains 6	0.159157	1.11663	0.0394576	0.0905303
16680836	MIR551A	microRNA 551a	0.019965	1.01393	0.762163	0.858358
16680842	WRAP73	WD repeat containing, antisense to TP73	0.023495	1.01642	0.761834	0.858269
16680874	TP73-AS1	TP73 antisense RNA 1	0.1218	1.08809	0.15105	0.273847
16680891	LRRC47	leucine rich repeat containing 47	-0.429753	-1.347	1.56979e-07	1.0476e-06
16680901	CEP104	centrosomal protein 104kDa	-0.230567	-1.1733	0.00263589	0.00814832
16680935	C1orf174	chromosome 1 open reading frame 174	0.17102	1.12585	0.0334815	0.0787721
16680962	MIR4689	microRNA 4689	-0.00335	-1.00232	0.980251	0.989363
16680964	NPHP4	nephronophthisis 4	0.139218	1.10131	0.0813046	0.166481
16681013	CHD5	chromodomain helicase DNA binding protein 5	-0.405737	-1.32477	2.07118e-06	1.13656e-05
16681064	RPL22	ribosomal protein L22	0.456942	1.37263	1.71589e-07	1.13897e-06
16681078	LOC102724450	uncharacterized LOC102724450	0.357185	1.28092	0.000232294	0.000883994
16681082	ICMT	isoprenylcysteine carboxyl methyltransferase	-0.334183	-1.26066	1.77804e-06	9.8733e-06
16681095	GPR153	G protein-coupled receptor 153	-0.700473	-1.62504	9.57589e-09	8.06937e-08
16681103	ACOT7	acyl-CoA thioesterase 7	-0.300883	-1.2319	8.99173e-06	4.41686e-05
16681127	HES2	hes family bHLH transcription factor 2	-0.067175	-1.04766	0.372152	0.538798
16681137	MIR4252	microRNA 4252	-0.09269	-1.06636	0.433888	0.598406
16681142	TNFRSF25	tumor necrosis factor receptor superfamily, member 25	-1.42184	-2.67926	1.80401e-15	5.42423e-14
16681159	PLEKHG5	pleckstrin homology domain containing, family G (with RhoGef domain) member 5	0.00136667	1.00095	0.984544	0.991789
16681192	NOL9	nucleolar protein 9	-0.345428	-1.27053	1.0085e-06	5.85207e-06
16681210	KLHL21	kelch-like family member 21	0.181613	1.13415	0.0137562	0.0361872
16681225	DNAJC11	DnaJ (Hsp40) homolog, subfamily C, member 11	-0.0372417	-1.02615	0.571591	0.718092
16681263	LOC100129476	uncharacterized LOC100129476	0.0183667	1.01281	0.87363	0.929599
16681266	LOC100129048		0.14535	1.106	0.0257074	0.0626178
16681271	LOC101928836	uncharacterized LOC101928836	0.02948	1.02064	0.728702	0.835474
16681278	UTS2	urotensin 2	0.702928	1.62781	2.73031e-08	2.10328e-07
16681288	TNFRSF9	tumor necrosis factor receptor superfamily, member 9	-0.116305	-1.08396	0.226392	0.374123
16681304	ERRFI1	ERBB receptor feedback inhibitor 1	-0.799783	-1.74084	3.76005e-10	4.06967e-09
16681323	RERE	arginine-glutamic acid dipeptide (RE) repeats	-0.378953	-1.3004	2.32155e-06	1.26117e-05
16681370	ENO1	enolase 1, (alpha)	0.194145	1.14405	0.0123402	0.0329128
16681390	ENO1-IT1		0.199232	1.14809	0.0406323	0.0928183
16681395	SLC2A7	solute carrier family 2 (facilitated glucose transporter), member 7	-0.0996033	-1.07148	0.142297	0.261086
16681408	SLC2A5	solute carrier family 2 (facilitated glucose/fructose transporter), member 5	-0.521407	-1.43535	8.61612e-07	5.05482e-06
16681437	GPR157	G protein-coupled receptor 157	-0.832977	-1.78136	1.39123e-10	1.64306e-09
16681449	MIR34A		0.108245	1.07792	0.203573	0.34522
16681451	MIR34A		-0.000443333	-1.00031	0.995119	0.997429
16681457	LOC100506022	uncharacterized LOC100506022	-0.066505	-1.04718	0.367464	0.534035
16681460	RN5S40		0.0153217	1.01068	0.833962	0.905794
16681468	PIK3CD-AS1	PIK3CD antisense RNA 1	0.653927	1.57344	5.245e-08	3.83617e-07
16681473	PIK3CD-AS2	PIK3CD antisense RNA 2	0.0230617	1.01611	0.758723	0.856254
16681477	CLSTN1	calsyntenin 1	0.26108	1.19838	0.000273031	0.00102501
16681501	CTNNBIP1	catenin, beta interacting protein 1	-0.679845	-1.60197	1.48527e-08	1.20721e-07
16681511	LZIC	leucine zipper and CTNNBIP1 domain containing	-0.584612	-1.49964	3.026e-09	2.77177e-08
16681528	LOC100287506		-0.00801	-1.00557	0.92993	0.961086
16681531	DFFA	DNA fragmentation factor, 45kDa, alpha polypeptide	0.0983717	1.07056	0.236172	0.386405
16681542	CASZ1	castor zinc finger 1	0.0709183	1.05039	0.315206	0.47812
16681576	C1orf127	chromosome 1 open reading frame 127	-0.0885183	-1.06328	0.20681	0.348789
16681595	MASP2	mannan-binding lectin serine peptidase 2	0.0205283	1.01433	0.752606	0.852223
16681611	SRM	spermidine synthase	-0.236288	-1.17796	0.00088349	0.00301309
16681625	EXOSC10	exosome component 10	0.0177933	1.01241	0.771353	0.865036
16681661	MTOR	mechanistic target of rapamycin (serine/threonine kinase)	-0.447667	-1.36383	7.89963e-08	5.57389e-07
16681735	FBXO2	F-box protein 2	0.080885	1.05767	0.122614	0.23228
16681749	MAD2L2	MAD2 mitotic arrest deficient-like 2 (yeast)	-0.121087	-1.08755	0.0603257	0.129458
16681771	LOC102724659	uncharacterized LOC102724659	0.050855	1.03588	0.538818	0.690099
16681775	MTHFR	methylenetetrahydrofolate reductase (NAD(P)H)	-0.534722	-1.44866	3.11868e-05	0.000139656
16681799	NPPA	natriuretic peptide A	0.00251167	1.00174	0.977111	0.98783
16681806	NPPB	natriuretic peptide B	-0.0276317	-1.01934	0.669606	0.792605
16681812	RNU5E-4P		0.440262	1.35685	0.000142323	0.000563935
16681814	KIAA2013	KIAA2013	-0.0448667	-1.03159	0.614802	0.75132
16681827	DHRS3	dehydrogenase/reductase (SDR family) member 3	0.349377	1.27401	0.000139602	0.000554295
16681845	PRAMEF11	PRAME family member 11	0.149215	1.10897	0.0460845	0.103293
16681852	HNRNPCL1		0.0448083	1.03155	0.587737	0.73097
16681856	PRAMEF4	PRAME family member 4	-0.12764	-1.09251	0.128475	0.240933
16681862	PRAMEF10	PRAME family member 10	0.00426667	1.00296	0.974976	0.986422
16681867	PRAMEF23		-0.416048	-1.33427	0.000236779	0.000899337
16681884	HNRNPCL2	heterogeneous nuclear ribonucleoprotein C-like 2	0.170805	1.12569	0.273984	0.431937
16681887	PRAMEF26	PRAME family member 26	0.125693	1.09103	0.423248	0.58869
16681891	PRAMEF3		-0.348995	-1.27367	0.0177234	0.0452453
16681901	PRAMEF8		0.0318417	1.02232	0.644642	0.774876
16681907	PRAMEF13		0.0493883	1.03483	0.43351	0.598158
16681914	PRAMEF18		-0.00440167	-1.00306	0.960887	0.978676
16681920	PRAMEF8		0.105118	1.07558	0.164664	0.292803
16681924	PRAMEF14		0.0125067	1.00871	0.899739	0.944789
16681933	PRAMEF19		0.0758817	1.054	0.288834	0.448999
16681940	LRRC38	leucine rich repeat containing 38	0.010245	1.00713	0.913623	0.952504
16681945	RN5S41		0.09926	1.07122	0.198728	0.338837
16681974	TMEM51-AS1	TMEM51 antisense RNA 1	0.127367	1.0923	0.155355	0.28006
16681981	C1orf195	chromosome 1 open reading frame 195	-0.161033	-1.11809	0.0527369	0.115689
16681986	LOC101927417	uncharacterized LOC101927417	-0.045705	-1.03219	0.542407	0.692969
16681992	LOC101927441	uncharacterized LOC101927441	0.01524	1.01062	0.820033	0.896844
16681996	CASP9	caspase 9, apoptosis-related cysteine peptidase	0.0614633	1.04352	0.436663	0.600482
16682016	AGMAT	agmatine ureohydrolase (agmatinase)	0.227545	1.17084	0.00561926	0.0162073
16682036	SLC25A34		0.14588	1.10641	0.123587	0.233708
16682042	UQCRHL	ubiquinol-cytochrome c reductase hinge protein like	0.41036	1.32902	3.75893e-05	0.00016586
16682044	FLJ37453	uncharacterized LOC729614	-0.318357	-1.24691	0.000499549	0.00178972
16682047	ZBTB17	zinc finger and BTB domain containing 17	0.056085	1.03964	0.452792	0.61469
16682077	HSPB7	heat shock 27kDa protein family, member 7 (cardiovascular)	-0.0405583	-1.02851	0.559896	0.708406
16682090	FAM131C	family with sequence similarity 131, member C	-0.0167517	-1.01168	0.848417	0.914693
16682098	EPHA2	EPH receptor A2	-0.09316	-1.0667	0.107172	0.208543
16682120	ARHGEF19	Rho guanine nucleotide exchange factor (GEF) 19	-0.18968	-1.14051	0.00948255	0.0260296
16682144	ANO7L1		0.00357	1.00248	0.958496	0.977452
16682148	RSG1	REM2 and RAB-like small GTPase 1	-0.398627	-1.31825	3.93199e-05	0.000172907
16682161	FBXO42	F-box protein 42	-0.405333	-1.32439	0.00155326	0.00504991
16682175	SPATA21	spermatogenesis associated 21	0.0574083	1.04059	0.54853	0.698545
16682203	CROCCP3	ciliary rootlet coiled-coil, rootletin pseudogene 3	-0.0954633	-1.06841	0.205328	0.347149
16682225	NBPF1		-1.66194	-3.16442	7.95394e-12	1.19337e-10
16682259	CROCCP2	ciliary rootlet coiled-coil, rootletin pseudogene 2	-0.05814	-1.04112	0.562345	0.710249
16682278	ESPNP	espin pseudogene	-0.12563	-1.09098	0.257676	0.412351
16682290	MST1L	macrophage stimulating 1-like	-0.187975	-1.13916	0.0619974	0.132473
16682322	MIR3675	microRNA 3675	-0.0978183	-1.07015	0.123127	0.233044
16682329	LOC100506687		0.09935	1.07129	0.563198	0.710931
16682333	MFAP2	microfibrillar-associated protein 2	-0.0702567	-1.0499	0.320595	0.483709
16682348	ATP13A2	ATPase type 13A2	-1.83636	-3.57108	6.67985e-20	5.55976e-18
16682384	SDHB	succinate dehydrogenase complex, subunit B, iron sulfur (Ip)	0.0996267	1.0715	0.157015	0.282523
16682402	PADI2	peptidyl arginine deiminase, type II	0.222702	1.16692	0.00406551	0.0120549
16682425	RCC2	regulator of chromosome condensation 2	-0.0892667	-1.06383	0.105687	0.20611
16682450	TAS1R2	taste receptor, type 1, member 2	0.205212	1.15286	0.0043231	0.0127527
16682460	ALDH4A1		-0.679378	-1.60145	7.43229e-11	9.22749e-10
16682485	MIR1290	microRNA 1290	0.166108	1.12203	0.421289	0.586733
16682487	IFFO2	intermediate filament family orphan 2	-1.21643	-2.32371	5.72494e-13	1.07287e-11
16682499	UBR4	ubiquitin protein ligase E3 component n-recognin 4	-0.30544	-1.2358	1.49047e-05	7.05727e-05
16682631	EMC1	ER membrane protein complex subunit 1	-0.55326	-1.4674	1.3261e-07	8.94987e-07
16682671	AKR7L	aldo-keto reductase family 7-like (gene/pseudogene)	-0.0519983	-1.0367	0.664863	0.789619
16682679	AKR7A3	aldo-keto reductase family 7, member A3 (aflatoxin aldehyde reductase)	0.184907	1.13674	0.062951	0.134231
16682689	LOC100506730	uncharacterized LOC100506730	0.33318	1.25979	0.0209657	0.0524529
16682691	AKR7A2	aldo-keto reductase family 7, member A2	0.459055	1.37464	0.000136967	0.000544743
16682704	CAPZB	capping protein (actin filament) muscle Z-line, beta	-0.236485	-1.17812	0.0015432	0.00502104
16682726	LOC100130193	uncharacterized LOC100130193	-0.064375	-1.04563	0.601364	0.741367
16682733	TMCO4	transmembrane and coiled-coil domains 4	-1.16559	-2.24325	2.49282e-14	6.02421e-13
16682760	RNF186	ring finger protein 186	0.0361783	1.02539	0.708653	0.821241
16682764	PLA2G2E	phospholipase A2, group IIE	0.007915	1.0055	0.921665	0.956142
16682771	PLA2G2A	phospholipase A2, group IIA (platelets, synovial fluid)	-0.120735	-1.08729	0.113861	0.218773
16682785	PLA2G2D	phospholipase A2, group IID	-0.078175	-1.05568	0.369622	0.536178
16682792	PLA2G2C	phospholipase A2, group IIC	-0.175132	-1.12907	0.0403614	0.0923409
16682801	UBXN10-AS1	UBXN10 antisense RNA 1	0.540565	1.45454	2.1079e-07	1.37739e-06
16682807	LINC01141	long intergenic non-protein coding RNA 1141	0.02531	1.0177	0.734455	0.839422
16682829	CAMK2N1	calcium/calmodulin-dependent protein kinase II inhibitor 1	-1.0683	-2.09696	6.08833e-13	1.13242e-11
16682835	MUL1	mitochondrial E3 ubiquitin protein ligase 1	-0.169498	-1.12467	0.0579963	0.12528
16682842	DDOST	dolichyl-diphosphooligosaccharide--protein glycosyltransferase subunit (non-catalytic)	-0.0753833	-1.05364	0.130739	0.244347
16682861	KIF17	kinesin family member 17	0.154615	1.11312	0.0160574	0.0415295
16682886	SH2D5	SH2 domain containing 5	0.100598	1.07222	0.172812	0.304295
16682904	HP1BP3	heterochromatin protein 1, binding protein 3	-0.169347	-1.12455	0.0259562	0.0631464
16682930	EIF4G3	eukaryotic translation initiation factor 4 gamma, 3	0.0478267	1.03371	0.482632	0.641465
16682987	MIR1256	microRNA 1256	-0.029155	-1.02041	0.827341	0.901364
16682989	ECE1	endothelin converting enzyme 1	-0.0210483	-1.0147	0.782463	0.871884
16683022	RAP1GAP	RAP1 GTPase activating protein	0.330298	1.25727	6.12822e-05	0.000259158
16683061	USP48	ubiquitin specific peptidase 48	0.272687	1.20806	0.00014928	0.000589698
16683105	HSPG2	heparan sulfate proteoglycan 2	0.14947	1.10916	0.0264446	0.0641564
16683216	LOC101928043	uncharacterized LOC101928043	-0.369462	-1.29187	3.34414e-05	0.000148791
16683221	WNT4	wingless-type MMTV integration site family, member 4	-0.0558933	-1.0395	0.476396	0.635705
16683237	MIR4253	microRNA 4253	-0.167425	-1.12305	0.0889264	0.179218
16683239	LACTBL1	lactamase, beta-like 1	-0.125205	-1.09066	0.128704	0.241271
16683245	C1orf234	chromosome 1 open reading frame 234	-0.0492533	-1.03473	0.4969	0.654371
16683250	LUZP1	leucine zipper protein 1	-0.429072	-1.34637	4.93729e-06	2.53955e-05
16683264	HTR1D	5-hydroxytryptamine (serotonin) receptor 1D, G protein-coupled	-0.0859717	-1.0614	0.16472	0.292884
16683268	LINC01355	long intergenic non-protein coding RNA 1355	-0.0140817	-1.00981	0.907007	0.948954
16683271	HNRNPR	heterogeneous nuclear ribonucleoprotein R	-0.14125	-1.10286	0.0418802	0.0952697
16683290	ZNF436	zinc finger protein 436	-0.324295	-1.25205	0.0042224	0.0124816
16683300	TCEA3	transcription elongation factor A (SII), 3	-0.149643	-1.1093	0.0601997	0.129262
16683317	ASAP3	ArfGAP with SH3 domain, ankyrin repeat and PH domain 3	-0.05707	-1.04035	0.414351	0.579898
16683358	E2F2	E2F transcription factor 2	-0.44093	-1.35748	0.000158582	0.000623059
16683377	ID3	inhibitor of DNA binding 3, dominant negative helix-loop-helix protein	0.313565	1.24277	0.000567194	0.00200888
16683387	TCEB3-AS1	TCEB3 antisense RNA 1	0.339188	1.26504	0.00133236	0.00438824
16683397	GALE	UDP-galactose-4-epimerase	-0.304667	-1.23513	0.000819226	0.00281033
16683423	HMGCL	3-hydroxymethyl-3-methylglutaryl-CoA lyase	-0.156132	-1.1143	0.0453111	0.101851
16683445	FUCA1	fucosidase, alpha-L- 1, tissue	-1.2145	-2.32061	3.26788e-12	5.26911e-11
16683460	CNR2	cannabinoid receptor 2 (macrophage)	0.984028	1.97798	8.07999e-14	1.76639e-12
16683470	SRSF10		-0.197743	-1.1469	0.0249575	0.0609906
16683490	LOC100289079		0.0920167	1.06586	0.206734	0.348716
16683493	MYOM3	myomesin 3	-0.00655333	-1.00455	0.921872	0.956142
16683541	IL22RA1	interleukin 22 receptor, alpha 1	-0.00255333	-1.00177	0.978175	0.988267
16683551	IFNLR1	interferon, lambda receptor 1	0.138388	1.10067	0.0913999	0.183261
16683574	STPG1	sperm-tail PG-rich repeat containing 1	0.382415	1.30352	6.80915e-06	3.41168e-05
16683605	NIPAL3		0.152297	1.11134	0.0482368	0.107406
16683607	RCAN3AS	RCAN3 antisense	-0.14031	-1.10214	0.0706503	0.14798
16683612	LOC100506985	uncharacterized LOC100506985	-0.319045	-1.2475	0.000185787	0.000719696
16683624	RUNX3	runt-related transcription factor 3	-1.99079	-3.97454	9.271e-17	3.72302e-15
16683644	SYF2	SYF2 pre-mRNA-splicing factor	0.122042	1.08827	0.0729664	0.152051
16683655	C1orf63		-0.06363	-1.04509	0.381711	0.54819
16683678	RHCE		-0.0402833	-1.02832	0.708782	0.821348
16683700	LOC100507013		0.288793	1.22162	0.000947938	0.00321522
16683703	LOC646471	uncharacterized LOC646471	-0.14228	-1.10365	0.0420198	0.0955483
16683712	AUNIP	aurora kinase A and ninein interacting protein	-0.387195	-1.30785	0.000869358	0.00296795
16683719	PAQR7	progestin and adipoQ receptor family member VII	0.489438	1.4039	7.30909e-08	5.19411e-07
16683723	STMN1	stathmin 1	0.012805	1.00892	0.811303	0.891715
16683739	PAFAH2	platelet-activating factor acetylhydrolase 2, 40kDa	-0.238173	-1.1795	0.00130995	0.00431967
16683758	SLC30A2	solute carrier family 30 (zinc transporter), member 2	0.0714933	1.0508	0.315521	0.478452
16683771	TRIM63	tripartite motif containing 63, E3 ubiquitin protein ligase	-0.154328	-1.1129	0.123484	0.233557
16683788	UBXN11	UBX domain protein 11	0.570723	1.48527	7.3694e-08	5.23198e-07
16683817	AIM1L	absent in melanoma 1-like	0.161122	1.11816	0.0376762	0.0871139
16683852	ZNF683	zinc finger protein 683	-0.360497	-1.28387	9.2963e-05	0.000380811
16683866	LOC101928324	uncharacterized LOC101928324	-0.0609983	-1.04319	0.586135	0.729887
16683875	GPN2	GPN-loop GTPase 2	0.0707833	1.05029	0.271145	0.428746
16683887	GPATCH3	G patch domain containing 3	-0.172008	-1.12663	0.0580671	0.125406
16683903	NR0B2	nuclear receptor subfamily 0, group B, member 2	0.138318	1.10062	0.0752575	0.155801
16683908	KDF1	keratinocyte differentiation factor 1	0.10503	1.07552	0.194463	0.333729
16683917	OSTCP2		0.103552	1.07442	0.199679	0.340029
16683920	FAM46B	family with sequence similarity 46, member B	0.189448	1.14033	0.0437818	0.0989356
16683925	SLC9A1	solute carrier family 9, subfamily A (NHE1, cation proton antiporter 1), member 1	-0.220473	-1.16512	0.0171551	0.0439641
16683960	MAP3K6	mitogen-activated protein kinase kinase kinase 6	-0.260027	-1.1975	0.00197436	0.00626986
16684000	FCN3	ficolin (collagen/fibrinogen domain containing) 3	0.0362967	1.02548	0.720609	0.829387
16684014	CD164L2	CD164 sialomucin-like 2	0.051165	1.0361	0.416326	0.58208
16684024	WASF2	WAS protein family, member 2	-0.055135	-1.03896	0.426664	0.591757
16684036	AHDC1	AT hook, DNA binding motif, containing 1	-0.783512	-1.72132	3.55096e-11	4.71305e-10
16684056	FGR	FGR proto-oncogene, Src family tyrosine kinase	-0.456113	-1.37184	3.81136e-07	2.38286e-06
16684080	IFI6	interferon, alpha-inducible protein 6	-2.81184	-7.02178	2.399e-18	1.39615e-16
16684089	RPA2	replication protein A2, 32kDa	0.00902	1.00627	0.889967	0.939029
16684110	EYA3	EYA transcriptional coactivator and phosphatase 3	-0.195838	-1.14539	0.0137593	0.0361922
16684136	EYA3-IT1		-0.0408317	-1.02871	0.766877	0.861735
16684142	RNU7-29P		-0.573005	-1.48762	0.000523676	0.00186829
16684144	PTAFR	platelet-activating factor receptor	-0.674138	-1.59564	6.29666e-06	3.18003e-05
16684152	DNAJC8	DnaJ (Hsp40) homolog, subfamily C, member 8	0.0261867	1.01832	0.746438	0.847493
16684175	SNHG3		-0.137848	-1.10026	0.223324	0.370408
16684178	SNHG12		0.762453	1.69637	6.16267e-11	7.78419e-10
16684192	SNORD99	small nucleolar RNA, C/D box 99	0.678237	1.60018	0.00153169	0.00498576
16684194	TAF12	TAF12 RNA polymerase II, TATA box binding protein (TBP)-associated factor, 20kDa	0.215338	1.16098	0.00533405	0.0154549
16684214	TMEM200B	transmembrane protein 200B	-0.0304183	-1.02131	0.697692	0.812806
16684222	SRSF4	serine/arginine-rich splicing factor 4	-0.19936	-1.14819	0.00934243	0.0256781
16684241	MECR	mitochondrial trans-2-enoyl-CoA reductase	0.285562	1.21888	0.00865946	0.0239589
16684271	LOC101928460	uncharacterized LOC101928460	-0.0337633	-1.02368	0.672553	0.794814
16684280	LOC101929406	uncharacterized LOC101929406	0.084665	1.06044	0.233776	0.383327
16684297	MATN1	matrilin 1, cartilage matrix protein	-0.127578	-1.09246	0.0651032	0.13804
16684310	LAPTM5	lysosomal protein transmembrane 5	-0.160317	-1.11753	0.00537857	0.0155692
16684326	MIR4420	microRNA 4420	-0.00116	-1.0008	0.987314	0.993314
16684331	SDC3	syndecan 3	-0.10546	-1.07584	0.172092	0.303278
16684344	PUM1	pumilio RNA-binding family member 1	0.022035	1.01539	0.672891	0.79505
16684385	SNORD103A		0.081975	1.05847	0.537907	0.689457
16684387	SNORD103A		0.081975	1.05847	0.537907	0.689457
16684389	SNORD85	small nucleolar RNA, C/D box 85	0.0472417	1.03329	0.704805	0.818213
16684391	NKAIN1	Na+/K+ transporting ATPase interacting 1	0.11445	1.08256	0.11319	0.217827
16684406	SNRNP40	small nuclear ribonucleoprotein 40kDa (U5)	-0.06397	-1.04534	0.298994	0.460682
16684429	FABP3	fatty acid binding protein 3, muscle and heart	0.370258	1.29258	7.67226e-05	0.000318843
16684447	PEF1	penta-EF-hand domain containing 1	-0.217225	-1.1625	0.00174064	0.00559323
16684461	COL16A1	collagen, type XVI, alpha 1	0.0883117	1.06313	0.179989	0.31435
16684535	ADGRB2	adhesion G protein-coupled receptor B2	0.03194	1.02239	0.647084	0.776477
16684579	MIR4254	microRNA 4254	0.0227733	1.01591	0.818843	0.896201
16684581	SPOCD1	SPOC domain containing 1	-0.0398833	-1.02803	0.602329	0.742095
16684614	PTP4A2	protein tyrosine phosphatase type IVA, member 2	-0.231357	-1.17394	0.00317823	0.00963983
16684642	LOC100653331		0.211635	1.158	0.00220197	0.00692549
16684649	TMEM234	transmembrane protein 234	0.114642	1.08271	0.215092	0.35986
16684674	MTMR9LP	myotubularin related protein 9-like, pseudogene	-0.064945	-1.04605	0.427457	0.59255
16684686	MARCKSL1	MARCKS-like 1	0.584535	1.49956	1.10118e-07	7.56903e-07
16684694	LOC100128071		-0.112717	-1.08126	0.122193	0.23166
16684700	BSDC1	BSD domain containing 1	-0.172808	-1.12725	0.0409665	0.0935027
16684723	ZBTB8OS	zinc finger and BTB domain containing 8 opposite strand	-0.404468	-1.3236	0.000333948	0.00123396
16684744	SYNC	syncoilin, intermediate filament protein	-0.102047	-1.0733	0.191016	0.3294
16684760	YARS	tyrosyl-tRNA synthetase	0.124107	1.08983	0.0958342	0.190498
16684785	FNDC5	fibronectin type III domain containing 5	-0.00278167	-1.00193	0.970137	0.983673
16684800	TMEM54	transmembrane protein 54	0.084275	1.06015	0.317664	0.48081
16684812	RNF19B	ring finger protein 19B	-0.00922833	-1.00642	0.904292	0.947207
16684826	AK2	adenylate kinase 2	0.466083	1.38135	1.6047e-08	1.29271e-07
16684854	TRIM62	tripartite motif containing 62	-0.354953	-1.27894	0.00245151	0.00762901
16684870	PHC2	polyhomeotic homolog 2 (Drosophila)	-0.050605	-1.0357	0.560542	0.708964
16684902	CSMD2	CUB and Sushi multiple domains 2	-0.0271833	-1.01902	0.661797	0.787151
16684995	MIR552	microRNA 552	-0.0864467	-1.06175	0.478675	0.637656
16684997	SMIM12	small integral membrane protein 12	-0.0270167	-1.0189	0.667277	0.791326
16685012	DLGAP3	discs, large (Drosophila) homolog-associated protein 3	0.149895	1.10949	0.0820868	0.167818
16685031	LOC653160	uncharacterized LOC653160	-0.04816	-1.03395	0.604007	0.743088
16685036	ZMYM6NB		-0.633237	-1.55104	9.19022e-09	7.77075e-08
16685042	ZMYM6	zinc finger, MYM-type 6	-0.156832	-1.11484	0.0109548	0.0296098
16685076	SFPQ	splicing factor proline/glutamine-rich	-0.167495	-1.12311	0.0228928	0.056576
16685096	ZMYM4-AS1		0.0137617	1.00958	0.832844	0.90509
16685099	KIAA0319L	KIAA0319-like	-0.313717	-1.24291	0.000348841	0.00128532
16685139	PSMB2	proteasome subunit beta 2	-0.865673	-1.82219	1.14709e-11	1.66975e-10
16685144	PSMB2	proteasome subunit beta 2	-0.143977	-1.10495	0.00991797	0.0270752
16685157	C1orf216	chromosome 1 open reading frame 216	-0.412748	-1.33122	0.000352604	0.00129855
16685165	CLSPN	claspin	-0.126973	-1.092	0.0736035	0.1531
16685201	COL8A2	collagen, type VIII, alpha 2	0.306873	1.23702	8.62349e-05	0.000355154
16685208	TRAPPC3	trafficking protein particle complex 3	0.028835	1.02019	0.687562	0.80554
16685222	EVA1B	eva-1 homolog B (C. elegans)	0.278025	1.21253	0.00229427	0.00719075
16685227	STK40	serine/threonine kinase 40	-0.636823	-1.5549	1.01126e-08	8.48084e-08
16685246	LSM10	LSM10, U7 small nuclear RNA associated	-0.372248	-1.29437	0.000414665	0.00150754
16685255	OSCP1	organic solute carrier partner 1	-0.195168	-1.14486	0.0191684	0.0484816
16685281	MRPS15	mitochondrial ribosomal protein S15	0.25109	1.19011	0.000132435	0.000528339
16685295	CSF3R	colony stimulating factor 3 receptor (granulocyte)	-0.204815	-1.15254	0.00900634	0.0248299
16685330	GRIK3	glutamate receptor, ionotropic, kainate 3	-0.61446	-1.53098	4.38278e-09	3.89948e-08
16685357	RN5S43		0.0194433	1.01357	0.80531	0.887847
16685359	LINC01137	long intergenic non-protein coding RNA 1137	-0.646183	-1.56502	4.20307e-07	2.60969e-06
16685362	MEAF6	MYST/Esa1-associated factor 6	-0.209365	-1.15618	0.00216673	0.00682764
16685374	SNIP1	Smad nuclear interacting protein 1	0.197205	1.14648	0.00969516	0.0265407
16685383	GNL2	guanine nucleotide binding protein-like 2 (nucleolar)	-0.0109083	-1.00759	0.872018	0.928907
16685413	RSPO1	R-spondin 1	0.138003	1.10038	0.109354	0.211806
16685427	C1orf109	chromosome 1 open reading frame 109	-0.284795	-1.21824	0.000312828	0.00116226
16685443	EPHA10	EPH receptor A10	-0.0552933	-1.03907	0.466267	0.626589
16685482	YRDC	yrdC N(6)-threonylcarbamoyltransferase domain containing	0.0738183	1.0525	0.275538	0.433737
16685489	MTF1	metal-regulatory transcription factor 1	0.0818317	1.05836	0.201835	0.342897
16685505	INPP5B	inositol polyphosphate-5-phosphatase B	-0.269955	-1.20577	0.000130262	0.000520225
16685544	SF3A3	splicing factor 3a, subunit 3, 60kDa	0.0577217	1.04082	0.362518	0.528876
16685571	FHL3	four and a half LIM domains 3	-2.01442	-4.04018	4.05968e-19	2.82632e-17
16685580	POU3F1	POU class 3 homeobox 1	0.0877533	1.06271	0.214891	0.359644
16685583	LINC01343	long intergenic non-protein coding RNA 1343	-0.011355	-1.0079	0.888937	0.938546
16685596	RRAGC	Ras-related GTP binding C	-0.679103	-1.60114	5.52722e-08	4.02283e-07
16685609	GJA9-MYCBP		0.047855	1.03373	0.500684	0.657353
16685626	RHBDL2	rhomboid, veinlet-like 2 (Drosophila)	-0.18204	-1.13449	0.0238819	0.0586894
16685645	RN5S44		-0.0169433	-1.01181	0.85936	0.920854
16685651	PPIEL		1.15084	2.22043	2.08438e-10	2.37235e-09
16685669	PABPC4	poly(A) binding protein, cytoplasmic 4 (inducible form)	-0.0227183	-1.01587	0.714033	0.824813
16685702	SNORA55	small nucleolar RNA, H/ACA box 55	0.432885	1.34993	9.70753e-05	0.000396131
16685704	HEYL	hes-related family bHLH transcription factor with YRPW motif-like	-0.659155	-1.57916	5.71524e-07	3.47403e-06
16685712	NT5C1A	5'-nucleotidase, cytosolic IA	0.004585	1.00318	0.951027	0.973306
16685719	HPCAL4	hippocalcin like 4	0.0626883	1.04441	0.484444	0.642861
16685729	BMP8B	bone morphogenetic protein 8b	0.444433	1.36078	0.000590248	0.00208285
16685743	OXCT2	3-oxoacid CoA transferase 2	0.395225	1.31515	3.74462e-05	0.000165326
16685748	TRIT1	tRNA isopentenyltransferase 1	-0.211973	-1.15827	0.00984523	0.0268963
16685769	MYCL	v-myc avian myelocytomatosis viral oncogene lung carcinoma derived homolog	0.0487183	1.03435	0.477701	0.636949
16685779	PPT1	palmitoyl-protein thioesterase 1	-0.585568	-1.50063	5.59344e-10	5.87894e-09
16685804	COL9A2	collagen, type IX, alpha 2	-0.04372	-1.03077	0.527701	0.681089
16685851	RIMS3	regulating synaptic membrane exocytosis 3	-0.21496	-1.16067	0.0124463	0.0331631
16685866	NFYC-AS1	NFYC antisense RNA 1	0.34349	1.26882	0.0015712	0.0051049
16685868	CITED4	Cbp/p300-interacting transactivator, with Glu/Asp-rich carboxy-terminal domain, 4	0.368915	1.29138	1.3416e-06	7.62896e-06
16685875	SLFNL1	schlafen-like 1	-0.133275	-1.09678	0.0935423	0.186777
16685889	SCMH1	sex comb on midleg homolog 1 (Drosophila)	-0.268072	-1.2042	0.000579688	0.00204814
16685918	LOC101929901	uncharacterized LOC101929901	-0.07858	-1.05598	0.491828	0.649929
16685921	RN5S45		0.0327033	1.02293	0.752597	0.852223
16685923	EDN2	endothelin 2	-0.0935733	-1.06701	0.212318	0.356118
16685935	HIVEP3	human immunodeficiency virus type I enhancer binding protein 3	-1.27357	-2.4176	5.3117e-16	1.78637e-14
16685953	GUCA2A	guanylate cyclase activator 2A (guanylin)	0.133062	1.09662	0.217096	0.362363
16685958	FOXJ3	forkhead box J3	-0.127638	-1.0925	0.104962	0.204977
16685986	ZMYND12	zinc finger, MYND-type containing 12	0.002205	1.00153	0.97699	0.987828
16686000	CLDN19	claudin 19	0.0577417	1.04084	0.527675	0.681089
16686010	P3H1	prolyl 3-hydroxylase 1	-0.738293	-1.6682	1.37197e-10	1.6216e-09
16686040	SVBP	small vasohibin binding protein	-0.231542	-1.17409	0.0300744	0.0717706
16686060	SLC2A1	solute carrier family 2 (facilitated glucose transporter), member 1	-0.544082	-1.45809	3.45482e-09	3.12279e-08
16686088	EBNA1BP2		-0.066235	-1.04698	0.258487	0.413315
16686111	C1orf210	chromosome 1 open reading frame 210	0.108007	1.07774	0.108226	0.210126
16686122	ELOVL1		-0.256087	-1.19423	0.00272825	0.00840766
16686140	MED8	mediator complex subunit 8	0.124233	1.08993	0.0564331	0.122472
16686155	MIR6735	microRNA 6735	-0.110137	-1.07933	0.365712	0.532398
16686158	HYI	hydroxypyruvate isomerase (putative)	-0.50604	-1.42015	1.78571e-06	9.90646e-06
16686176	KDM4A-AS1	KDM4A antisense RNA 1	-0.0926217	-1.06631	0.303563	0.465819
16686187	LOC101929592	uncharacterized LOC101929592	-0.13336	-1.09685	0.136176	0.252246
16686195	LOC101929609	uncharacterized LOC101929609	-0.236383	-1.17804	0.00517587	0.0150361
16686201	SLC6A9	solute carrier family 6 (neurotransmitter transporter, glycine), member 9	1.30539	2.4715	8.5133e-15	2.24289e-13
16686233	ERI3	ERI1 exoribonuclease family member 3	-0.371072	-1.29331	0.000843594	0.00288727
16686253	ERI3-IT1	ERI3 intronic transcript 1	-0.105262	-1.07569	0.266175	0.422615
16686260	TMEM53	transmembrane protein 53	0.22058	1.1652	0.00732866	0.0206128
16686271	RNU5F-1	RNA, U5F small nuclear 1	0.60485	1.52082	5.36236e-05	0.000229441
16686273	RNU5D-1	RNA, U5D small nuclear 1	-0.226107	-1.16967	0.0646372	0.137218
16686282	BEST4	bestrophin 4	0.0736217	1.05236	0.348731	0.513904
16686293	TCTEX1D4	Tctex1 domain containing 4	-0.0920317	-1.06587	0.184395	0.320448
16686297	PTCH2	patched 2	0.00197	1.00137	0.974008	0.985819
16686324	EIF2B3	eukaryotic translation initiation factor 2B, subunit 3 gamma, 58kDa	0.21036	1.15698	0.0028784	0.00882294
16686345	HECTD3	HECT domain containing E3 ubiquitin protein ligase 3	-0.511583	-1.42561	1.88137e-07	1.24162e-06
16686376	ZSWIM5	zinc finger, SWIM-type containing 5	-0.0103083	-1.00717	0.879585	0.933371
16686401	MUTYH	mutY DNA glycosylase	-0.34756	-1.27241	0.000189561	0.000733171
16686438	TESK2	testis-specific kinase 2	-0.274202	-1.20932	0.00621537	0.0177496
16686458	CCDC163P	coiled-coil domain containing 163, pseudogene	0.00746833	1.00519	0.916051	0.953551
16686472	PRDX1	peroxiredoxin 1	-0.619352	-1.53618	1.75391e-10	2.02749e-09
16686484	CCDC17	coiled-coil domain containing 17	-0.163992	-1.12038	0.0588946	0.126917
16686510	GPBP1L1	GC-rich promoter binding protein 1-like 1	0.186198	1.13776	0.0108817	0.0294417
16686536	RPS15AP10	ribosomal protein S15a pseudogene 10	-0.145727	-1.10629	0.361398	0.527829
16686538	IPP	intracisternal A particle-promoted polypeptide	-0.546543	-1.46058	2.55522e-06	1.37856e-05
16686557	PIK3R3	phosphoinositide-3-kinase, regulatory subunit 3 (gamma)	0.689583	1.61282	2.01249e-11	2.80084e-10
16686574	POMGNT1	protein O-linked mannose N-acetylglucosaminyltransferase 1 (beta 1,2-)	-0.477352	-1.39219	9.28245e-08	6.47295e-07
16686611	LRRC41	leucine rich repeat containing 41	-0.49455	-1.40888	5.87541e-08	4.26064e-07
16686634	LINC01398	long intergenic non-protein coding RNA 1398	0.15492	1.11336	0.0101116	0.0275567
16686640	KNCN	kinocilin	0.11894	1.08594	0.0442736	0.0998969
16686648	MKNK1	MAP kinase interacting serine/threonine kinase 1	-0.01393	-1.0097	0.874707	0.930213
16686686	MOB3C	MOB kinase activator 3C	-0.409868	-1.32856	2.27395e-05	0.000104118
16686695	ATPAF1	ATP synthase mitochondrial F1 complex assembly factor 1	-0.451642	-1.3676	5.44104e-07	3.32295e-06
16686716	EFCAB14	EF-hand calcium binding domain 14	0.114678	1.08273	0.120804	0.229478
16686734	CYP4Z2P	cytochrome P450, family 4, subfamily Z, polypeptide 2, pseudogene	0.0763783	1.05437	0.500392	0.657155
16686745	CYP4A11		0.06829	1.04847	0.3646	0.531039
16686774	PDZK1IP1	PDZK1 interacting protein 1	-0.0414067	-1.02912	0.605154	0.743938
16686784	TAL1	T-cell acute lymphocytic leukemia 1	-0.771055	-1.70652	6.96211e-11	8.69812e-10
16686796	STIL	SCL/TAL1 interrupting locus	-0.18117	-1.1338	0.0033348	0.0100721
16686827	LINC01389	long intergenic non-protein coding RNA 1389	-0.931203	-1.90687	7.04082e-11	8.7854e-10
16686832	FOXD2-AS1	FOXD2 antisense RNA 1 (head to head)	-1.13288	-2.19296	1.0196e-09	1.03022e-08
16686839	TRABD2B	TraB domain containing 2B	0.049695	1.03505	0.481729	0.64055
16686852	SKINTL	Skint-like, pseudogene	0.0117083	1.00815	0.851783	0.916587
16686863	SPATA6	spermatogenesis associated 6	0.0315467	1.02211	0.641935	0.772744
16686865	SPATA6	spermatogenesis associated 6	0.0175483	1.01224	0.827467	0.901434
16686887	AGBL4	ATP/GTP binding protein-like 4	0.130745	1.09486	0.0455536	0.102307
16686910	BEND5	BEN domain containing 5	0.166982	1.12271	0.0343228	0.0804528
16686922	AGBL4-IT1	AGBL4 intronic transcript 1	0.119545	1.08639	0.154018	0.27807
16686945	DMRTA2	DMRT-like family A2	0.114993	1.08297	0.102625	0.201311
16686951	FAF1	Fas (TNFRSF6) associated factor 1	0.38078	1.30205	1.10043e-05	5.32124e-05
16686985	LINC01562	long intergenic non-protein coding RNA 1562	0.20282	1.15095	0.0050583	0.0147247
16686990	TTC39A	tetratricopeptide repeat domain 39A	-0.06187	-1.04382	0.325797	0.489204
16687028	EPS15	epidermal growth factor receptor pathway substrate 15	-0.770867	-1.70629	4.3203e-12	6.80762e-11
16687071	NRD1	nardilysin (N-arginine dibasic convertase)	-0.588295	-1.50347	3.984e-11	5.22726e-10
16687123	RAB3B	RAB3B, member RAS oncogene family	0.135233	1.09827	0.182408	0.317644
16687132	TXNDC12	thioredoxin domain containing 12 (endoplasmic reticulum)	0.221853	1.16623	0.00056293	0.00199472
16687146	TXNDC12		0.129797	1.09414	0.062402	0.133233
16687150	CC2D1B	coiled-coil and C2 domain containing 1B	-0.24017	-1.18113	0.00146487	0.00478708
16687188	ORC1	origin recognition complex, subunit 1	0.03328	1.02334	0.607307	0.745486
16687208	ZCCHC11	zinc finger, CCHC domain containing 11	-0.224088	-1.16804	0.0151484	0.0394112
16687264	COA7	cytochrome c oxidase assembly factor 7 (putative)	-0.0442033	-1.03111	0.467355	0.627426
16687273	ECHDC2	enoyl CoA hydratase domain containing 2	0.195293	1.14496	0.00362717	0.0108742
16687307	SLC1A7	solute carrier family 1 (glutamate transporter), member 7	0.09509	1.06813	0.199372	0.339662
16687328	C1orf123	chromosome 1 open reading frame 123	-0.248848	-1.18826	0.00198866	0.00630853
16687342	MAGOH		-0.08977	-1.0642	0.369196	0.535847
16687352	LRP8	low density lipoprotein receptor-related protein 8, apolipoprotein e receptor	-0.727693	-1.65599	1.36261e-11	1.95954e-10
16687400	SLC25A3P1	solute carrier family 25 (mitochondrial carrier; phosphate carrier), member 3 pseudogene 1	0.0718217	1.05104	0.306072	0.468312
16687403	GLIS1	GLIS family zinc finger 1	-0.0336583	-1.0236	0.600081	0.740336
16687418	NDC1	NDC1 transmembrane nucleoporin	-0.156752	-1.11477	0.0116128	0.0312158
16687445	YIPF1	Yip1 domain family, member 1	0.001425	1.00099	0.9829	0.990545
16687467	HSPB11	heat shock protein family B (small), member 11	-0.662485	-1.58281	8.74494e-09	7.41528e-08
16687479	LDLRAD1	low density lipoprotein receptor class A domain containing 1	0.147433	1.1076	0.0573582	0.1241
16687487	TMEM59	transmembrane protein 59	-0.542905	-1.4569	4.12835e-09	3.69044e-08
16687505	CDCP2	CUB domain containing protein 2	-0.33764	-1.26369	0.000353701	0.00130226
16687524	CYB5RL	cytochrome b5 reductase-like	-0.243422	-1.1838	0.00481835	0.0140812
16687546	SSBP3	single stranded DNA binding protein 3	-0.800655	-1.74189	9.26083e-11	1.13046e-09
16687583	FAM151A	family with sequence similarity 151, member A	0.123282	1.08921	0.205191	0.347036
16687598	PARS2	prolyl-tRNA synthetase 2, mitochondrial (putative)	-0.511378	-1.42541	0.000328636	0.00121614
16687602	TTC22	tetratricopeptide repeat domain 22	-0.0757333	-1.0539	0.351111	0.516365
16687618	DHCR24	24-dehydrocholesterol reductase	-0.7391	-1.66913	2.31602e-12	3.87482e-11
16687638	USP24	ubiquitin specific peptidase 24	-0.356197	-1.28005	3.06065e-05	0.000137243
16687719	LOC100507652		0.00347667	1.00241	0.967303	0.982336
16687737	PPAP2B	phosphatidic acid phosphatase type 2B	-0.458892	-1.37449	3.62428e-06	1.908e-05
16687752	C1orf168	chromosome 1 open reading frame 168	0.156882	1.11487	0.016705	0.0429768
16687779	C8B	complement component 8, beta polypeptide	-0.276315	-1.2111	0.000537603	0.00191271
16687799	DAB1	Dab, reelin signal transducer, homolog 1 (Drosophila)	0.084555	1.06036	0.19125	0.329632
16687825	DAB1	Dab, reelin signal transducer, homolog 1 (Drosophila)	0.00985	1.00685	0.915301	0.953109
16687827	DAB1	Dab, reelin signal transducer, homolog 1 (Drosophila)	0.0462867	1.0326	0.798794	0.883391
16687829	OMA1	OMA1 zinc metallopeptidase	-0.000855	-1.00059	0.988249	0.993681
16687847	TACSTD2	tumor-associated calcium signal transducer 2	-0.0120817	-1.00841	0.852008	0.916709
16687851	MYSM1	Myb-like, SWIRM and MPN domains 1	-0.0446183	-1.03141	0.501668	0.658247
16687875	JUN	jun proto-oncogene	-0.164948	-1.12113	0.0988545	0.19548
16687899	HSD52	uncharacterized LOC729467	0.134895	1.09801	0.0469259	0.104942
16687909	MIR4711	microRNA 4711	0.07161	1.05089	0.392372	0.559241
16687914	CYP2J2	cytochrome P450, family 2, subfamily J, polypeptide 2	0.0284767	1.01993	0.699957	0.814457
16687931	C1orf87	chromosome 1 open reading frame 87	-0.0337267	-1.02365	0.598681	0.739207
16687952	LOC105378763	uncharacterized LOC105378763	-0.107865	-1.07763	0.176981	0.310169
16687962	LOC101926964	uncharacterized LOC101926964	-0.212273	-1.15851	0.0152164	0.0395743
16687969	NFIA-AS2	NFIA antisense RNA 2	-0.164217	-1.12056	0.036174	0.0841236
16687980	NFIA-AS1	NFIA antisense RNA 1	0.226933	1.17034	0.0187349	0.047506
16687985	TM2D1	TM2 domain containing 1	0.129653	1.09403	0.132292	0.246586
16688002	MIR3116-2	microRNA 3116-2	0.0109067	1.00759	0.878622	0.932646
16688007	KANK4	KN motif and ankyrin repeat domains 4	-0.475897	-1.39078	1.58053e-06	8.87097e-06
16688024	DOCK7	dedicator of cytokinesis 7	-0.278613	-1.21303	0.000679071	0.00236852
16688094	LINC00466	long intergenic non-protein coding RNA 466	0.149898	1.10949	0.0656595	0.139002
16688113	RN5S49		0.11634	1.08398	0.449697	0.611845
16688115	FOXD3-AS1	FOXD3 antisense RNA 1 (head to head)	-0.052835	-1.0373	0.498153	0.655486
16688123	ITGB3BP	integrin beta 3 binding protein (beta3-endonexin)	-0.119907	-1.08666	0.0354628	0.0827021
16688153	ROR1-AS1	ROR1 antisense RNA 1	0.0312383	1.02189	0.651412	0.779899
16688162	RNU7-62P		-0.61874	-1.53553	0.000193532	0.000747559
16688164	JAK1	Janus kinase 1	-0.80909	-1.75211	3.09262e-14	7.30776e-13
16688195	LINC01359	long intergenic non-protein coding RNA 1359	-0.747182	-1.67851	5.92766e-07	3.5907e-06
16688210	MIR3671	microRNA 3671	-0.503963	-1.4181	0.000120292	0.000483259
16688212	MIR101-1	microRNA 101-1	-0.108818	-1.07834	0.215787	0.360698
16688216	LOC102724416	uncharacterized LOC102724416	0.08736	1.06242	0.277694	0.436025
16688219	LOC101927139	uncharacterized LOC101927139	0.104763	1.07532	0.155668	0.280556
16688230	INSL5	insulin-like 5	0.103575	1.07443	0.151533	0.274532
16688235	WDR78	WD repeat domain 78	-0.340883	-1.26653	0.000174662	0.000680492
16688269	SLC35D1	solute carrier family 35 (UDP-GlcA/UDP-GalNAc transporter), member D1	0.252175	1.191	0.00528451	0.0153233
16688287	C1orf141	chromosome 1 open reading frame 141	0.0101467	1.00706	0.877107	0.931801
16688308	SERBP1	SERPINE1 mRNA binding protein 1	0.0305383	1.02139	0.619202	0.754833
16688323	GNG12	guanine nucleotide binding protein (G protein), gamma 12	-1.19487	-2.28924	7.12882e-14	1.57814e-12
16688330	RNU7-80P		-0.0535017	-1.03778	0.74673	0.84776
16688332	DIRAS3	DIRAS family, GTP-binding RAS-like 3	0.194143	1.14404	0.0211279	0.0527967
16688339	WLS	wntless Wnt ligand secretion mediator	0.16624	1.12213	0.0472309	0.105482
16688368	MIR1262	microRNA 1262	0.206185	1.15363	0.0809878	0.165889
16688370	RPE65	retinal pigment epithelium-specific protein 65kDa	0.1806	1.13336	0.0176039	0.0449822
16688386	DEPDC1	DEP domain containing 1	0.14318	1.10434	0.137959	0.254757
16688420	LRRC40	leucine rich repeat containing 40	-0.249688	-1.18895	0.000785345	0.00270375
16688441	ANKRD13C	ankyrin repeat domain 13C	-0.118845	-1.08587	0.0492518	0.109193
16688460	LOC102724548	uncharacterized LOC102724548	0.0343333	1.02408	0.64107	0.772077
16688469	PTGER3	prostaglandin E receptor 3 (subtype EP3)	-0.77556	-1.71185	1.17308e-10	1.40718e-09
16688487	ZRANB2	zinc finger, RAN-binding domain containing 2	0.03443	1.02415	0.495001	0.652685
16688506	NEGR1	neuronal growth regulator 1	-2.28367	-4.86916	3.24474e-20	2.96766e-18
16688521	NEGR1-IT1	NEGR1 intronic transcript 1	-0.16381	-1.12024	0.111492	0.215208
16688535	RN5S50		0.121518	1.08788	0.127901	0.240037
16688537	LRRIQ3	leucine-rich repeats and IQ motif containing 3	0.251618	1.19054	0.000262218	0.0009879
16688563	LRRC53		0.154312	1.11289	0.0969233	0.192291
16688574	ERICH3	glutamate-rich 3	-0.01258	-1.00876	0.84687	0.913785
16688594	CRYZ	crystallin, zeta (quinone reductase)	0.129802	1.09414	0.194868	0.334128
16688615	SLC44A5	solute carrier family 44, member 5	-0.91786	-1.88931	2.5216e-11	3.44504e-10
16688654	ASB17	ankyrin repeat and SOCS box containing 17	-0.00912667	-1.00635	0.894004	0.941561
16688665	PIGK	phosphatidylinositol glycan anchor biosynthesis, class K	-0.548287	-1.46235	3.1016e-08	2.36546e-07
16688683	ZZZ3	zinc finger, ZZ-type containing 3	-0.0114133	-1.00794	0.870738	0.928084
16688708	USP33	ubiquitin specific peptidase 33	-0.235833	-1.17759	0.000891066	0.00303753
16688748	NEXN-AS1	NEXN antisense RNA 1	0.0262833	1.01839	0.747674	0.848444
16688753	FUBP1	far upstream element (FUSE) binding protein 1	0.40127	1.32067	3.6383e-08	2.73833e-07
16688792	RN5S22		-0.0356567	-1.02502	0.767152	0.861979
16688794	RN5S23		-0.041565	-1.02923	0.74609	0.847291
16688799	ADGRL4	adhesion G protein-coupled receptor L4	-0.0379583	-1.02666	0.592163	0.734216
16688835	LOC101927434	uncharacterized LOC101927434	-0.02029	-1.01416	0.771014	0.864851
16688850	LINC01361	long intergenic non-protein coding RNA 1361	0.0474467	1.03343	0.466157	0.626527
16688864	TTLL7	tubulin tyrosine ligase-like family member 7	-1.44137	-2.71579	4.36143e-16	1.48863e-14
16688904	TTLL7-IT1	TTLL7 intronic transcript 1	-0.435312	-1.3522	0.000381655	0.00139673
16688912	UOX	urate oxidase, pseudogene	-0.0370933	-1.02604	0.634372	0.766769
16688929	GNG5	guanine nucleotide binding protein (G protein), gamma 5	-0.38763	-1.30824	0.000571564	0.00202363
16688937	CTBS	chitobiase, di-N-acetyl-	-0.17223	-1.1268	0.0168474	0.0432686
16688955	LINC01555	long intergenic non-protein coding RNA 1555	0.143755	1.10478	0.0533821	0.116846
16688961	SSX2IP	synovial sarcoma, X breakpoint 2 interacting protein	0.384128	1.30507	2.55804e-05	0.000116121
16688992	LPAR3	lysophosphatidic acid receptor 3	1.58057	2.99089	2.02844e-16	7.56462e-15
16688999	MCOLN2	mucolipin 2	1.94256	3.84386	3.85471e-20	3.43664e-18
16689020	MCOLN3	mucolipin 3	-0.085	-1.06069	0.174174	0.306168
16689042	SYDE2	synapse defective 1, Rho GTPase, homolog 2 (C. elegans)	1.24121	2.36396	6.84039e-14	1.5188e-12
16689053	C1orf52	chromosome 1 open reading frame 52	-0.09599	-1.0688	0.144377	0.264088
16689060	BCL10	B-cell CLL/lymphoma 10	0.0498567	1.03516	0.440913	0.604708
16689070	DDAH1	dimethylarginine dimethylaminohydrolase 1	1.28888	2.44339	1.75324e-12	3.00238e-11
16689098	ZNHIT6	zinc finger, HIT-type containing 6	0.0663267	1.04705	0.532015	0.684416
16689113	COL24A1	collagen, type XXIV, alpha 1	-0.27783	-1.21237	0.000155718	0.000613018
16689180	RN5S51		-0.267483	-1.20371	0.0371381	0.0860299
16689182	ODF2L	outer dense fiber of sperm tails 2-like	-0.0412033	-1.02897	0.596068	0.737218
16689227	SEP15	15 kDa selenoprotein	-0.223785	-1.16779	0.000227421	0.00086722
16689246	LINC01364	long intergenic non-protein coding RNA 1364	0.02904	1.02033	0.656289	0.782845
16689251	RN5S52		0.0834617	1.05956	0.416804	0.582589
16689268	PKN2-AS1	PKN2 antisense RNA 1	0.0296317	1.02075	0.822658	0.898232
16689275	GTF2B	general transcription factor IIB	0.346265	1.27127	8.43564e-05	0.000348092
16689289	CCBL2		0.282703	1.21647	8.47698e-06	4.18332e-05
16689312	GBP3	guanylate binding protein 3	-0.0534633	-1.03775	0.5137	0.668766
16689330	GBP3		-0.597002	-1.51257	8.36869e-06	4.1333e-05
16689332	GBP1	guanylate binding protein 1, interferon-inducible	-2.045	-4.12674	2.53313e-16	9.23864e-15
16689352	GBP2	guanylate binding protein 2, interferon-inducible	-0.927842	-1.90243	3.62479e-10	3.93615e-09
16689354	GBP2	guanylate binding protein 2, interferon-inducible	-0.469907	-1.38502	0.000102294	0.000415778
16689371	GBP7	guanylate binding protein 7	-0.147327	-1.10752	0.163457	0.291247
16689384	GBP4	guanylate binding protein 4	-3.02157	-8.12051	1.82684e-19	1.35409e-17
16689400	GBP5	guanylate binding protein 5	-2.51212	-5.70459	8.01537e-23	1.62472e-20
16689422	FLJ27354	uncharacterized LOC400761	0.340888	1.26654	0.000106571	0.000432029
16689434	LOC101927952	uncharacterized LOC101927952	-0.104808	-1.07535	0.0805593	0.165137
16689441	LRRC8C		0.102985	1.07399	0.406553	0.572443
16689447	GEMIN8P4	gem (nuclear organelle) associated protein 8 pseudogene 4	-0.29389	-1.22594	0.00590966	0.0169529
16689460	BARHL2	BarH-like homeobox 2	-0.025095	-1.01755	0.788522	0.875916
16689465	LOC149351	uncharacterized LOC149351	-0.249863	-1.18909	0.000905169	0.00308032
16689474	ZNF644	zinc finger protein 644	0.226238	1.16978	0.009911	0.0270611
16689490	HFM1	HFM1, ATP-dependent DNA helicase homolog	1.09286	2.13296	5.2812e-12	8.17051e-11
16689546	TGFBR3	transforming growth factor, beta receptor III	-0.476542	-1.3914	1.32381e-08	1.08666e-07
16689581	GLMN	glomulin, FKBP associated protein	-0.0289283	-1.02025	0.762369	0.85845
16689605	GFI1	growth factor independent 1 transcription repressor	-0.0211083	-1.01474	0.727982	0.835065
16689618	EVI5	ecotropic viral integration site 5	2.16074	4.47144	6.61779e-16	2.15744e-14
16689650	FAM69A	family with sequence similarity 69, member A	-0.289338	-1.22208	0.00326043	0.00986507
16689664	TMED5	transmembrane p24 trafficking protein 5	0.230918	1.17358	0.00201427	0.0063823
16689678	LOC100131564	uncharacterized LOC100131564	0.632522	1.55027	6.38356e-06	3.21792e-05
16689704	RN5S53		0.374458	1.29635	0.0026705	0.00824588
16689706	BCAR3	breast cancer anti-estrogen resistance 3	0.053685	1.03791	0.514571	0.669712
16689734	MIG7	mig-7	0.10019	1.07191	0.300138	0.461966
16689737	DNTTIP2	deoxynucleotidyltransferase, terminal, interacting protein 2	0.239473	1.18056	0.00201476	0.00638318
16689752	GCLM	glutamate-cysteine ligase, modifier subunit	-0.277265	-1.2119	0.000256244	0.000967352
16689764	ABCA4	ATP-binding cassette, sub-family A (ABC1), member 4	-0.00776833	-1.0054	0.908314	0.94965
16689828	ARHGAP29	Rho GTPase activating protein 29	0.151938	1.11106	0.0123908	0.03303
16689869	F3	coagulation factor III (thromboplastin, tissue factor)	1.08418	2.12017	1.22975e-11	1.78311e-10
16689888	LINC01057	long intergenic non-protein coding RNA 1057	-0.322198	-1.25023	0.000286031	0.00106964
16689907	CNN3	calponin 3, acidic	0.060145	1.04257	0.306837	0.469079
16689923	ALG14	ALG14, UDP-N-acetylglucosaminyltransferase subunit	0.380608	1.30189	2.83492e-05	0.00012791
16689935	LOC101928118	uncharacterized LOC101928118	0.159982	1.11727	0.0782516	0.16106
16689950	LOC101928169	uncharacterized LOC101928169	-0.0314083	-1.02201	0.677959	0.79904
16689960	LOC101928241	uncharacterized LOC101928241	-0.00891833	-1.0062	0.918659	0.954804
16689969	DPYD	dihydropyrimidine dehydrogenase	-0.6449	-1.56363	1.08986e-08	9.09649e-08
16690001	DPYD-IT1		-0.262142	-1.19926	0.0114308	0.030771
16690011	MIR137HG		0.00374333	1.0026	0.953274	0.974599
16690017	MIR2682		0.13734	1.09988	0.0267687	0.0648003
[truncated: 27,798 more rows]

## Sheet: (1) HighOxphos.Met_vs_Ctrl
Affymetrix ID	Gene Symbol	GnName	ENSG	log2Ratio	FC	pval	fdr
16657436	DDX11L1			0.227505	1.17081	0.00611031	0.0448666
16657440	MIR1302-11			0.15111	1.11042	0.0430132	0.175258
16657445	OR4F5	olfactory receptor, family 4, subfamily F, member 5	ENSG00000186092	0.0602167	1.04262	0.426048	0.668452
16657450	LOC100132062			0.38462	1.30552	6.33834e-05	0.00132289
16657469	LINC00266-1			0.410137	1.32881	0.000199855	0.00323645
16657473	OR4F29			-0.07418	-1.05276	0.556392	0.76028
16657476	LOC100508047			0.162398	1.11915	0.00943224	0.0616749
16657485	MTND2P28			-0.134782	-1.09793	0.11437	0.321294
16657492	LOC100287934	uncharacterized LOC100287934		0.19553	1.14514	0.163558	0.397913
16657502	LOC100287934	uncharacterized LOC100287934		0.593138	1.50852	8.94727e-05	0.00175281
16657506	FAM87B	family with sequence similarity 87, member B	ENSG00000177757	-0.00214667	-1.00149	0.979503	0.991818
16657514	LINC01128	long intergenic non-protein coding RNA 1128	ENSG00000228794	-0.169058	-1.12432	0.0343394	0.150738
16657529	LOC284600	uncharacterized LOC284600		-0.0110033	-1.00766	0.927972	0.968959
16657534	SAMD11	sterile alpha motif domain containing 11	ENSG00000187634	-0.105457	-1.07583	0.151463	0.380922
16657554	KLHL17	kelch-like family member 17	ENSG00000187961	-0.001045	-1.00072	0.987789	0.995402
16657572	PLEKHN1	pleckstrin homology domain containing, family N member 1	ENSG00000187583	-0.16263	-1.11933	0.0472993	0.18616
16657594	ISG15	ISG15 ubiquitin-like modifier	ENSG00000187608	-0.207615	-1.15478	0.0339123	0.149701
16657598	AGRN	agrin	ENSG00000188157	-0.0343367	-1.02409	0.593483	0.785237
16657647	LINC01342	long intergenic non-protein coding RNA 1342	ENSG00000223823	0.0519967	1.0367	0.455246	0.688551
16657650	MIR200B	microRNA 200b	ENSG00000207730	-0.0302683	-1.0212	0.741527	0.875512
16657652	MIR200A	microRNA 200a	ENSG00000207607	-0.0174667	-1.01218	0.794917	0.904692
16657654	MIR429	microRNA 429	ENSG00000198976	-0.00942833	-1.00656	0.871993	0.943619
16657656	TTLL10	tubulin tyrosine ligase-like family member 10	ENSG00000162571	0.00839667	1.00584	0.878807	0.946498
16657680	B3GALT6	UDP-Gal:betaGal beta 1,3-galactosyltransferase polypeptide 6	ENSG00000176022	-0.0024	-1.00166	0.979879	0.991925
16657683	SCNN1D	sodium channel, non voltage gated 1 delta subunit	ENSG00000162572	-0.0741217	-1.05272	0.316868	0.570875
16657713	PUSL1	pseudouridylate synthase-like 1	ENSG00000169972	-0.242545	-1.18308	0.0244299	0.11896
16657730	CPTP	ceramide-1-phosphate transfer protein	ENSG00000224051	-0.056465	-1.03991	0.472576	0.702278
16657737	TAS1R3	taste receptor, type 1, member 3	ENSG00000169962	-0.0441217	-1.03106	0.556196	0.760264
16657751	LOC148413	uncharacterized LOC148413	ENSG00000224870	-0.196383	-1.14582	0.00457438	0.0361354
16657761	TMEM88B	transmembrane protein 88B	ENSG00000205116	-0.241697	-1.18238	0.0053366	0.0404849
16657767	VWA1	von Willebrand factor A domain containing 1	ENSG00000179403	0.0381567	1.0268	0.643521	0.818605
16657777	ATAD3C	ATPase family, AAA domain containing 3C	ENSG00000215915	0.0633367	1.04488	0.449858	0.685227
16657793	ATAD3B	ATPase family, AAA domain containing 3B	ENSG00000160072	0.121837	1.08812	0.392166	0.640469
16657821	ATAD3A			-0.426765	-1.34422	9.86159e-05	0.00188605
16657845	SSU72	SSU72 homolog, RNA polymerase II CTD phosphatase	ENSG00000160075	-0.114477	-1.08258	0.306312	0.560191
16657848	LOC284628	uncharacterized LOC284628		0.0600083	1.04247	0.593585	0.785289
16657856	MIB2	mindbomb E3 ubiquitin protein ligase 2	ENSG00000197530	0.16378	1.12022	0.0323006	0.144557
16657895	MMP23B			-0.00320167	-1.00222	0.965366	0.984799
16657910	MMP23A			0.0317733	1.02227	0.625802	0.807067
16657917	SLC35E2	solute carrier family 35, member E2	ENSG00000215790	0.0818867	1.0584	0.398874	0.646219
16657926	CALML6	calmodulin-like 6	ENSG00000169885	0.135735	1.09865	0.0588732	0.213646
16657938	GABRD	gamma-aminobutyric acid (GABA) A receptor, delta	ENSG00000187730	-0.130633	-1.09477	0.141683	0.365993
16657948	PRKCZ	protein kinase C, zeta	ENSG00000067606	-0.0455617	-1.03208	0.468284	0.699176
16657993	SKI	SKI proto-oncogene	ENSG00000157933	0.207098	1.15436	0.00583983	0.0435257
16658005	RER1	retention in endoplasmic reticulum sorting receptor 1	ENSG00000157916	0.08358	1.05964	0.251353	0.505266
16658020	PLCH2	phospholipase C, eta 2	ENSG00000149527,ENSG00000276429	0.0688633	1.04889	0.337296	0.590299
16658023	PLCH2	phospholipase C, eta 2	ENSG00000149527,ENSG00000276429	0.0586483	1.04149	0.422167	0.665255
16658064	TNFRSF14	tumor necrosis factor receptor superfamily, member 14	ENSG00000157873,ENSG00000273936	-0.0726617	-1.05166	0.385621	0.63444
16658102	LOC100996583	uncharacterized LOC100996583	ENSG00000228037	0.0882783	1.0631	0.295584	0.548972
16658106	FAM213B	family with sequence similarity 213, member B	ENSG00000157870,ENSG00000275125	-0.154822	-1.11328	0.044457	0.179012
16658129	ACTRT2	actin-related protein T2	ENSG00000169717	-0.135248	-1.09828	0.122921	0.336118
16658135	PRDM16	PR domain containing 16	ENSG00000142611	-0.0768	-1.05468	0.270258	0.524871
16658157	MIR4251	microRNA 4251		-0.108148	-1.07784	0.131946	0.350159
16658159	ARHGEF16	Rho guanine nucleotide exchange factor (GEF) 16	ENSG00000130762	0.00288667	1.002	0.9729	0.988728
16658184	TPRG1L	tumor protein p63 regulated 1-like	ENSG00000158109	-0.0506367	-1.03572	0.632005	0.811241
16658192	TP73	tumor protein p73	ENSG00000078900	-0.321087	-1.24927	0.000266997	0.00405696
16658210	CCDC27	coiled-coil domain containing 27	ENSG00000162592	0.0509567	1.03595	0.430258	0.671189
16658226	SMIM1	small integral membrane protein 1 (Vel blood group)	ENSG00000235169	0.0144617	1.01007	0.810917	0.913102
16658231	DFFB	DNA fragmentation factor, 40kDa, beta polypeptide (caspase-activated DNase)	ENSG00000169598	-0.00371333	-1.00258	0.969347	0.987036
16658248	LINC01134	long intergenic non-protein coding RNA 1134	ENSG00000236423	-0.0134933	-1.0094	0.873851	0.944111
16658254	LINC01346	long intergenic non-protein coding RNA 1346		-0.04823	-1.034	0.555006	0.759647
16658268	LOC284661	uncharacterized LOC284661	ENSG00000235054	0.00726667	1.00505	0.923543	0.967201
16658289	AJAP1	adherens junctions associated protein 1	ENSG00000196581	-0.0331767	-1.02326	0.601364	0.790456
16658312	KCNAB2	potassium channel, voltage gated subfamily A regulatory beta subunit 2	ENSG00000069424	0.132738	1.09637	0.13149	0.349589
16658350	RNF207	ring finger protein 207	ENSG00000158286	-0.249713	-1.18897	0.00842012	0.056757
16658379	LINC00337	long intergenic non-protein coding RNA 337		0.104163	1.07487	0.370051	0.620979
16658385	HES3	hes family bHLH transcription factor 3	ENSG00000173673	-0.11685	-1.08436	0.0484783	0.189207
16658390	ESPN	espin	ENSG00000187017	-0.144807	-1.10558	0.219906	0.469918
16658414	TAS1R1	taste receptor, type 1, member 1	ENSG00000173662	0.0960917	1.06887	0.263525	0.518193
16658428	ZBTB48	zinc finger and BTB domain containing 48	ENSG00000204859	0.17966	1.13262	0.00956521	0.0623119
16658449	PHF13	PHD finger protein 13	ENSG00000116273	-0.370593	-1.29288	0.000189609	0.00312661
16658457	THAP3	THAP domain containing, apoptosis associated protein 3	ENSG00000041988	0.02055	1.01435	0.801048	0.907974
16658471	LOC100505887	uncharacterized LOC100505887	ENSG00000228750	-0.0225683	-1.01577	0.742899	0.876194
16658479	CAMTA1	calmodulin binding transcription activator 1	ENSG00000171735	-0.0427317	-1.03006	0.442786	0.679632
16658525	CAMTA1	calmodulin binding transcription activator 1	ENSG00000171735	-0.216797	-1.16215	0.107065	0.308652
16658528	VAMP3	vesicle-associated membrane protein 3	ENSG00000049245	0.204557	1.15233	0.0144633	0.083294
16658536	PER3	period circadian clock 3	ENSG00000049246	-0.096505	-1.06918	0.197068	0.441773
16658568	PARK7	parkinson protein 7	ENSG00000116288	-0.0362117	-1.02542	0.54014	0.74886
16658589	LOC102724539	uncharacterized LOC102724539	ENSG00000227634	-0.048635	-1.03429	0.520626	0.735009
16658594	SLC45A1	solute carrier family 45, member 1	ENSG00000162426	-0.0265083	-1.01854	0.734478	0.871481
16658609	LOC102724552	uncharacterized LOC102724552		-0.0198	-1.01382	0.802903	0.909143
16658619	ENO1-AS1	ENO1 antisense RNA 1	ENSG00000230679	0.03501	1.02456	0.648216	0.821665
16658622	CA6	carbonic anhydrase VI	ENSG00000131686	-0.0231617	-1.01618	0.799698	0.907168
16658641	LOC102724571	uncharacterized LOC102724571		-0.05586	-1.03948	0.432268	0.672494
16658644	H6PD	hexose-6-phosphate dehydrogenase (glucose 1-dehydrogenase)	ENSG00000049239	0.368742	1.29123	0.000711986	0.00875208
16658655	SPSB1	splA/ryanodine receptor domain and SOCS box containing 1	ENSG00000171621	-0.0511033	-1.03606	0.409171	0.655805
16658664	SLC25A33	solute carrier family 25 (pyrimidine nucleotide carrier), member 33	ENSG00000171612	0.123432	1.08932	0.0679968	0.23453
16658674	TMEM201	transmembrane protein 201	ENSG00000188807	-0.221097	-1.16562	0.0185043	0.0990786
16658690	PIK3CD	phosphatidylinositol-4,5-bisphosphate 3-kinase, catalytic subunit delta	ENSG00000171608	0.08045	1.05735	0.181529	0.422282
16658736	NMNAT1	nicotinamide nucleotide adenylyltransferase 1	ENSG00000173614	0.131463	1.0954	0.0638274	0.225179
16658752	RBP7	retinol binding protein 7, cellular	ENSG00000162444	-0.125355	-1.09078	0.108674	0.311483
16658758	UBE4B	ubiquitination factor E4B	ENSG00000130939	-0.137385	-1.09991	0.06476	0.227366
16658802	KIF1B	kinesin family member 1B	ENSG00000054523	0.119298	1.08621	0.125898	0.340788
16658864	PGD	phosphogluconate dehydrogenase	ENSG00000142657	0.180455	1.13324	0.00581538	0.043407
16658889	APITD1			-0.072595	-1.05161	0.268889	0.52346
16658909	PEX14	peroxisomal biogenesis factor 14	ENSG00000142655	0.0559033	1.03951	0.509652	0.727641
16658926	TARDBP	TAR DNA binding protein	ENSG00000120948	-0.0473683	-1.03338	0.479025	0.707161
16658954	MTOR-AS1	MTOR antisense RNA 1	ENSG00000225602	0.0238333	1.01666	0.778044	0.896039
16658962	ANGPTL7	angiopoietin-like 7	ENSG00000171819	-0.0461217	-1.03249	0.525794	0.738769
16658973	UBIAD1	UbiA prenyltransferase domain containing 1	ENSG00000120942	-0.0723617	-1.05144	0.314362	0.568475
16658991	PTCHD2	patched domain containing 2	ENSG00000204624	-0.143055	-1.10424	0.209823	0.4586
16659017	LOC101929181	uncharacterized LOC101929181	ENSG00000235643	-0.04886	-1.03445	0.623367	0.805379
16659021	FBXO44	F-box protein 44	ENSG00000132879	0.0688767	1.0489	0.477843	0.706474
16659036	FBXO6	F-box protein 6	ENSG00000116663	-0.0520067	-1.03671	0.509001	0.727142
16659046	DRAXIN	dorsal inhibitory axon guidance protein	ENSG00000162490	0.01404	1.00978	0.810103	0.912821
16659054	AGTRAP			-0.07867	-1.05604	0.246047	0.499112
16659070	C1orf167	chromosome 1 open reading frame 167		-0.0715067	-1.05081	0.250156	0.503948
16659102	CLCN6	chloride channel, voltage-sensitive 6	ENSG00000011021	-0.26448	-1.2012	0.000178111	0.00297989
16659133	NPPA-AS1	NPPA antisense RNA 1		-0.320762	-1.24899	0.00258601	0.0237239
16659138	RNU5E-1	RNA, U5E small nuclear 1	ENSG00000199347	0.140948	1.10263	0.221765	0.472265
16659140	PLOD1	procollagen-lysine, 2-oxoglutarate 5-dioxygenase 1	ENSG00000083444	-0.265988	-1.20246	0.000222183	0.00352488
16659171	MFN2	mitofusin 2	ENSG00000116688	-0.12034	-1.08699	0.0789894	0.25692
16659200	MIIP	migration and invasion inhibitory protein	ENSG00000116691	-0.08907	-1.06368	0.236524	0.488949
16659217	TNFRSF8	tumor necrosis factor receptor superfamily, member 8	ENSG00000120949	-0.134233	-1.09751	0.0677175	0.233837
16659238	TNFRSF1B	tumor necrosis factor receptor superfamily, member 1B	ENSG00000028137	-0.111515	-1.08036	0.184112	0.42537
16659251	VPS13D	vacuolar protein sorting 13 homolog D (S. cerevisiae)	ENSG00000048707	0.197847	1.14699	0.0218713	0.110833
16659338	SNORA59A			0.239225	1.18036	0.0372669	0.159226
16659343	AADACL4	arylacetamide deacetylase-like 4	ENSG00000204518	0.0189517	1.01322	0.767244	0.890166
16659349	AADACL3	arylacetamide deacetylase-like 3	ENSG00000188984	-0.0307067	-1.02151	0.72881	0.86844
16659357	C1orf158	chromosome 1 open reading frame 158	ENSG00000157330	-0.161583	-1.11851	0.00827199	0.0561459
16659366	PRAMEF12	PRAME family member 12	ENSG00000116726	-0.203608	-1.15157	0.0888601	0.276183
16659371	PRAMEF1			-0.11075	-1.07979	0.0732229	0.245497
16659380	PRAMEF2	PRAME family member 2	ENSG00000120952,ENSG00000282817	-0.095465	-1.06841	0.189319	0.431182
16659387	PRAMEF7			0.0864933	1.06179	0.239716	0.492371
16659395	PRAMEF22			-0.223853	-1.16785	0.143355	0.368385
16659407	PRAMEF5			-0.169343	-1.12455	0.0561567	0.207605
16659413	PRAMEF15			-0.128563	-1.0932	0.0420891	0.172912
16659422	PRAMEF16			0.0219167	1.01531	0.87109	0.943389
16659428	PRAMEF20	PRAME family member 20	ENSG00000204478,ENSG00000204486	-0.0963217	-1.06904	0.18962	0.431537
16659434	PRAMEF15			-0.128563	-1.0932	0.0420891	0.172912
16659443	PRAMEF17			-0.149792	-1.10941	0.0378684	0.161195
16659449	PRAMEF20	PRAME family member 20	ENSG00000204478,ENSG00000204486	-0.0740933	-1.0527	0.349179	0.601303
16659459	PDPN	podoplanin	ENSG00000162493	-0.0891333	-1.06373	0.280674	0.535552
16659478	PRDM2	PR domain containing 2, with ZNF domain	ENSG00000116731	-0.02741	-1.01918	0.734142	0.871315
16659501	C1orf196			-0.0818917	-1.0584	0.265431	0.519852
16659508	KAZN	kazrin, periplakin interacting protein	ENSG00000189337	0.127838	1.09266	0.0996849	0.29553
16659537	TMEM51	transmembrane protein 51	ENSG00000171729	0.054545	1.03853	0.484255	0.71021
16659545	FHAD1	forkhead-associated (FHA) phosphopeptide binding domain 1	ENSG00000142621	0.08814	1.063	0.160652	0.394315
16659605	EFHD2	EF-hand domain family, member D2	ENSG00000142634	-0.281842	-1.21575	0.000705114	0.00869631
16659612	CTRC	chymotrypsin C (caldecrin)	ENSG00000162438	-0.037235	-1.02615	0.645683	0.819815
16659623	CELA2A	chymotrypsin-like elastase family, member 2A	ENSG00000142615	-0.256193	-1.19432	0.022056	0.111523
16659637	CELA2B	chymotrypsin-like elastase family, member 2B	ENSG00000215704	0.00312833	1.00217	0.961152	0.983064
16659650	DNAJC16	DnaJ (Hsp40) homolog, subfamily C, member 16	ENSG00000116138	0.221187	1.16569	0.00207148	0.0200348
16659686	DDI2			0.0386083	1.02712	0.627392	0.808127
16659704	PLEKHM2	pleckstrin homology domain containing, family M (with RUN domain) member 2	ENSG00000116786	0.0751267	1.05345	0.201709	0.44823
16659727	SLC25A34	solute carrier family 25, member 34	ENSG00000162461	0.065845	1.0467	0.326162	0.580275
16659737	TMEM82	transmembrane protein 82	ENSG00000162460	0.03687	1.02589	0.643907	0.818724
16659746	FBLIM1	filamin binding LIM protein 1	ENSG00000162458	-0.0859167	-1.06136	0.29756	0.550913
16659765	SPEN	spen family transcriptional repressor	ENSG00000065526	-0.02873	-1.02011	0.644068	0.818846
16659788	C1orf64	chromosome 1 open reading frame 64	ENSG00000183888	-0.08684	-1.06204	0.273868	0.528527
16659794	CLCNKA	chloride channel, voltage-sensitive Ka	ENSG00000186510	0.0325417	1.02281	0.706076	0.855895
16659825	CLCNKB	chloride channel, voltage-sensitive Kb	ENSG00000184908	-0.04688	-1.03303	0.635845	0.813563
16659853	LOC101927479	uncharacterized LOC101927479		-0.112983	-1.08146	0.126418	0.341668
16659862	ARHGEF19-AS1			0.00767167	1.00533	0.926765	0.968567
16659865	SZRD1	SUZ RNA binding domain containing 1	ENSG00000055070	-0.13589	-1.09877	0.0633312	0.224145
16659881	NECAP2	NECAP endocytosis associated 2	ENSG00000157191	-0.065905	-1.04674	0.277121	0.531944
16659911	LOC100133616			0.172302	1.12685	0.0357886	0.155365
16659916	MIR3675	microRNA 3675	ENSG00000263811	-0.0894617	-1.06397	0.203634	0.450827
16659918	CROCCP2	ciliary rootlet coiled-coil, rootletin pseudogene 2		0.0647817	1.04593	0.415902	0.660531
16659921	MST1P2			-0.023235	-1.01624	0.754339	0.883184
16659936	LOC729587			0.0172417	1.01202	0.758935	0.885851
16659938	MIR3675	microRNA 3675	ENSG00000263811	-0.0894617	-1.06397	0.203634	0.450827
16659944	LOC440570			0.235763	1.17753	0.0243609	0.118713
16659951	CROCC	ciliary rootlet coiled-coil, rootletin	ENSG00000058453	0.00649333	1.00451	0.921781	0.966511
16660008	LOC400743	uncharacterized LOC400743		0.00419167	1.00291	0.964831	0.98449
16660014	PADI1	peptidyl arginine deiminase, type I	ENSG00000142623,ENSG00000281459	0.080795	1.0576	0.23443	0.486719
16660038	PADI3	peptidyl arginine deiminase, type III	ENSG00000142619,ENSG00000280549	-0.0775283	-1.05521	0.523868	0.73735
16660057	MIR3972	microRNA 3972	ENSG00000266634,ENSG00000281810	0.0635683	1.04505	0.551569	0.757169
16660059	PADI4	peptidyl arginine deiminase, type IV	ENSG00000159339,ENSG00000280908	-0.0376517	-1.02644	0.684849	0.844254
16660081	PADI6	peptidyl arginine deiminase, type VI	ENSG00000276747,ENSG00000280949	-0.0953833	-1.06835	0.209481	0.458255
16660103	ARHGEF10L	Rho guanine nucleotide exchange factor (GEF) 10-like	ENSG00000074964	-0.00339833	-1.00236	0.964461	0.984478
16660151	ACTL8	actin-like 8	ENSG00000117148	-0.130543	-1.09471	0.0834297	0.265622
16660156	IGSF21	immunoglobin superfamily, member 21	ENSG00000117154	-0.107917	-1.07767	0.223902	0.474645
16660175	KLHDC7A	kelch domain containing 7A	ENSG00000179023	0.112743	1.08128	0.168089	0.404633
16660182	PAX7	paired box 7	ENSG00000009709	0.00810167	1.00563	0.897191	0.955146
16660196	LOC284513			0.178987	1.13209	0.0966663	0.290477
16660199	MRTO4	MRT4 homolog, ribosome maturation factor	ENSG00000053372	-0.515515	-1.4295	3.33095e-07	2.24046e-05
16660212	PQLC2	PQ loop repeat containing 2	ENSG00000040487	-0.0355317	-1.02493	0.677535	0.839299
16660228	PQLC2			-0.0142983	-1.00996	0.863103	0.940187
16660236	MINOS1			0.027095	1.01896	0.696843	0.849966
16660260	HTR6	5-hydroxytryptamine (serotonin) receptor 6, G protein-coupled	ENSG00000158748	0.186607	1.13808	0.0371522	0.158895
16660269	OTUD3	OTU deubiquitinase 3	ENSG00000169914	0.028295	1.01981	0.71988	0.864128
16660282	PLA2G5	phospholipase A2, group V	ENSG00000127472	-0.249203	-1.18855	0.00574775	0.04301
16660299	PLA2G2F	phospholipase A2, group IIF	ENSG00000158786	-0.0231867	-1.0162	0.781537	0.897743
16660313	UBXN10	UBX domain protein 10	ENSG00000162543	-0.147682	-1.10779	0.0719309	0.24265
16660324	VWA5B1	von Willebrand factor A domain containing 5B1	ENSG00000158816	-0.00438167	-1.00304	0.957902	0.981299
16660356	FAM43B	family with sequence similarity 43, member B	ENSG00000183114	-0.06645	-1.04714	0.351342	0.603535
16660360	CDA	cytidine deaminase	ENSG00000158825	-0.154028	-1.11267	0.0591484	0.214331
16660367	PINK1	PTEN induced putative kinase 1	ENSG00000158828	-0.15008	-1.10963	0.0221998	0.112117
16660388	LOC100506824			0.0735333	1.05229	0.36808	0.619222
16660392	LOC100506801	uncharacterized LOC100506801	ENSG00000231105	-0.257803	-1.19566	0.00392235	0.0323125
16660403	NBPF3	neuroblastoma breakpoint family, member 3	ENSG00000142794	0.371988	1.29414	0.00159801	0.0164587
16660436	ALPL	alkaline phosphatase, liver/bone/kidney	ENSG00000162551	-0.125142	-1.09061	0.0495946	0.192218
16660458	LDLRAD2	low density lipoprotein receptor class A domain containing 2	ENSG00000187942	-0.0415333	-1.02921	0.625215	0.806656
16660468	CELA3B	chymotrypsin-like elastase family, member 3B	ENSG00000219073	0.0949117	1.068	0.291406	0.54504
16660483	CELA3A	chymotrypsin-like elastase family, member 3A	ENSG00000142789	-0.0568067	-1.04016	0.592117	0.784281
16660497	LINC00339	long intergenic non-protein coding RNA 339	ENSG00000218510	0.524845	1.43878	0.000303537	0.00449082
16660503	CDC42	cell division cycle 42	ENSG00000070831	-0.11811	-1.08531	0.0437297	0.177166
16660518	CDC42-IT1	CDC42 intronic transcript 1		0.21435	1.16018	0.0659987	0.229833
16660527	ZBTB40	zinc finger and BTB domain containing 40	ENSG00000184677	-0.286137	-1.21937	4.61562e-05	0.00104349
16660552	ZBTB40-IT1			0.0509117	1.03592	0.55288	0.758113
16660555	EPHA8	EPH receptor A8	ENSG00000070886	0.0764517	1.05442	0.282976	0.537848
16660575	C1QA	complement component 1, q subcomponent, A chain	ENSG00000173372	0.0353233	1.02479	0.670523	0.835022
16660581	C1QC	complement component 1, q subcomponent, C chain	ENSG00000159189	-0.0509583	-1.03595	0.555968	0.760264
16660587	C1QB	complement component 1, q subcomponent, B chain	ENSG00000173369	-0.0749767	-1.05334	0.378646	0.628644
16660596	EPHB2	EPH receptor B2	ENSG00000133216	-0.0158717	-1.01106	0.817124	0.916859
16660620	MIR4684	microRNA 4684	ENSG00000265422	-0.142702	-1.10397	0.118891	0.329092
16660624	KDM1A	lysine (K)-specific demethylase 1A	ENSG00000004487	-0.115193	-1.08312	0.0193764	0.102314
16660648	MIR3115	microRNA 3115	ENSG00000263793	0.2023	1.15053	0.204177	0.45142
16660654	ZNF436-AS1	ZNF436 antisense RNA 1	ENSG00000249087	0.11405	1.08226	0.12689	0.342318
16660664	MDS2	myelodysplastic syndrome 2 translocation associated	ENSG00000197880	0.0122	1.00849	0.866407	0.941397
16660673	RPL11	ribosomal protein L11	ENSG00000142676	-0.0829767	-1.0592	0.228441	0.479559
16660685	TCEB3	transcription elongation factor B (SIII), polypeptide 3 (110kDa, elongin A)	ENSG00000011007	-0.150597	-1.11003	0.0438281	0.177438
16660700	PITHD1	PITH (C-terminal proteasome-interacting domain of thioredoxin-like) domain containing 1	ENSG00000057757	-0.136055	-1.0989	0.06969	0.238119
16660713	LYPLA2			-0.124483	-1.09012	0.331481	0.585034
16660734	MIR378F	microRNA 378f	ENSG00000264926	-0.23385	-1.17597	0.0321446	0.144097
16660736	PNRC2	proline-rich nuclear receptor coactivator 2	ENSG00000189266	0.0693017	1.04921	0.350309	0.602525
16660745	MYOM3			-0.199343	-1.14818	0.0241289	0.118154
16660749	MYOM3			0.110702	1.07975	0.115459	0.323522
16660753	LOC284632	uncharacterized LOC284632	ENSG00000230023	0.0532833	1.03762	0.482558	0.709292
16660757	GRHL3	grainyhead-like transcription factor 3	ENSG00000158055	-0.0550033	-1.03886	0.575286	0.773512
16660785	NIPAL3	NIPA-like domain containing 3	ENSG00000001461	0.171845	1.1265	0.0170536	0.0934778
16660810	RCAN3	RCAN family member 3	ENSG00000117602	0.0728733	1.05181	0.371576	0.622258
16660822	NCMAP	noncompact myelin associated protein	ENSG00000184454	-0.316438	-1.24525	0.0028363	0.0254711
16660828	SRRM1	serine/arginine repetitive matrix 1	ENSG00000133226	-0.149378	-1.10909	0.00393171	0.032336
16660863	CLIC4	chloride intracellular channel 4	ENSG00000169504	0.616238	1.53287	6.1115e-10	1.50048e-07
16660882	MIR4425	microRNA 4425	ENSG00000264371	0.079875	1.05693	0.297786	0.551148
16660891	RHD	Rh blood group, D antigen	ENSG00000187010	0.0653683	1.04635	0.39846	0.645883
16660906	TMEM50A	transmembrane protein 50A	ENSG00000183726	-0.045615	-1.03212	0.530936	0.74218
16660919	TMEM57	transmembrane protein 57	ENSG00000204178	-0.0551967	-1.039	0.316539	0.570627
16660933	LDLRAP1	low density lipoprotein receptor adaptor protein 1	ENSG00000157978	-0.106223	-1.07641	0.109861	0.313435
16660950	LDLRAP1	low density lipoprotein receptor adaptor protein 1	ENSG00000157978	0.09913	1.07113	0.142	0.366399
16660953	MAN1C1	mannosidase, alpha, class 1C, member 1	ENSG00000117643	0.666688	1.58742	3.62493e-10	9.47473e-08
16660976	SEPN1	selenoprotein N, 1	ENSG00000162430	0.361148	1.28445	2.46132e-06	0.0001093
16660992	MTFR1L	mitochondrial fission regulator 1-like	ENSG00000117640	0.0509067	1.03592	0.541058	0.749646
16661031	EXTL1	exostosin-like glycosyltransferase 1	ENSG00000158008	-0.0259517	-1.01815	0.715469	0.861356
16661051	PDIK1L	PDLIM1 interacting kinase 1 like	ENSG00000175087	0.0135783	1.00946	0.827117	0.921745
16661058	FAM110D	family with sequence similarity 110, member D	ENSG00000197245	0.073125	1.05199	0.290129	0.543988
16661063	ZNF593	zinc finger protein 593	ENSG00000142684	-0.0466683	-1.03288	0.521771	0.735927
16661071	CNKSR1	connector enhancer of kinase suppressor of Ras 1	ENSG00000142675	-0.00035	-1.00024	0.996726	0.998871
16661102	CATSPER4	cation channel, sperm associated 4	ENSG00000188782	0.02821	1.01975	0.717614	0.86259
16661117	CEP85	centrosomal protein 85kDa	ENSG00000130695	0.0407517	1.02865	0.508752	0.727028
16661141	SH3BGRL3	SH3 domain binding glutamate-rich protein like 3	ENSG00000142669	-0.124803	-1.09036	0.0793452	0.257571
16661149	CD52	CD52 molecule	ENSG00000169442	-0.361687	-1.28493	5.54041e-05	0.00120151
16661155	LIN28A	lin-28 homolog A (C. elegans)	ENSG00000131914	-0.0288283	-1.02018	0.726654	0.867516
16661164	DHDDS	dehydrodolichyl diphosphate synthase subunit	ENSG00000117682	-0.222368	-1.16665	0.00165319	0.0169046
16661192	HMGN2	high mobility group nucleosomal binding domain 2	ENSG00000198830	-0.109135	-1.07858	0.319655	0.573457
16661206	RPS6KA1	ribosomal protein S6 kinase, 90kDa, polypeptide 1	ENSG00000117676,ENSG00000281877	0.007375	1.00513	0.898733	0.956106
16661253	MIR1976	microRNA 1976	ENSG00000238705,ENSG00000280948	-0.0270117	-1.0189	0.801684	0.908384
16661255	ARID1A	AT rich interactive domain 1A (SWI-like)	ENSG00000117713	0.035065	1.0246	0.618927	0.802881
16661284	PIGV	phosphatidylinositol glycan anchor biosynthesis, class V	ENSG00000060642	0.281543	1.21549	0.00367042	0.0308599
16661298	ZDHHC18	zinc finger, DHHC-type containing 18	ENSG00000204160	-0.0824333	-1.0588	0.288188	0.542391
16661314	SFN	stratifin	ENSG00000175793	0.08456	1.06036	0.211747	0.460362
16661323	NUDC	nudC nuclear distribution protein	ENSG00000090273	-0.28591	-1.21918	6.10203e-05	0.00128952
16661342	TRNP1	TMF1-regulated nuclear protein 1	ENSG00000253368	-0.109107	-1.07856	0.147688	0.37462
16661347	LOC101928391	uncharacterized LOC101928391		0.0859433	1.06138	0.251906	0.505968
16661351	WDTC1	WD and tetratricopeptide repeats 1	ENSG00000142784	0.091645	1.06558	0.166535	0.402355
16661377	TMEM222	transmembrane protein 222	ENSG00000186501	0.030645	1.02147	0.698719	0.850722
16661396	ACTG1P20	actin gamma 1 pseudogene 20		0.171333	1.1261	0.122056	0.334427
16661398	SYTL1	synaptotagmin-like 1	ENSG00000142765	0.657218	1.57704	3.68318e-08	3.91956e-06
16661429	GPR3	G protein-coupled receptor 3	ENSG00000181773	0.0274733	1.01923	0.751457	0.881284
16661443	FAM76A	family with sequence similarity 76, member A	ENSG00000009780	-0.06919	-1.04913	0.458557	0.691165
16661459	STX12	syntaxin 12	ENSG00000117758	0.272948	1.20827	0.00155111	0.0161377
16661477	PPP1R8	protein phosphatase 1, regulatory subunit 8	ENSG00000117751	-0.28405	-1.21761	0.000301204	0.00445851
16661495	SCARNA1	small Cajal body-specific RNA 1	ENSG00000252947	0.222058	1.1664	0.109648	0.313038
16661497	THEMIS2	thymocyte selection associated family member 2	ENSG00000130775	-0.14221	-1.10359	0.130939	0.348773
16661508	SMPDL3B	sphingomyelin phosphodiesterase, acid-like 3B	ENSG00000130768	-0.0845617	-1.06037	0.240986	0.493669
16661527	XKR8	XK, Kell blood group complex subunit-related family, member 8	ENSG00000158156	-0.104453	-1.07509	0.17306	0.410923
16661533	ATPIF1	ATPase inhibitory factor 1	ENSG00000130770	-0.137068	-1.09967	0.0399727	0.167027
16661544	SESN2	sestrin 2	ENSG00000130766	1.58987	3.01023	2.65089e-15	5.64204e-12
16661556	MED18	mediator complex subunit 18	ENSG00000130772	-0.170892	-1.12575	0.0251303	0.121205
16661567	PHACTR4	phosphatase and actin regulator 4	ENSG00000204138	0.143298	1.10443	0.058694	0.213404
16661589	RCC1	regulator of chromosome condensation 1	ENSG00000180198	-0.185667	-1.13734	0.00878712	0.0585922
16661617	TRNAU1AP	tRNA selenocysteine 1 associated protein 1	ENSG00000180098	0.0172433	1.01202	0.801269	0.908087
16661636	RAB42	RAB42, member RAS oncogene family	ENSG00000188060	-0.14938	-1.10909	0.0761308	0.251053
16661646	RNU11	RNA, U11 small nuclear	ENSG00000270103,ENSG00000274978	0.399602	1.31914	4.63743e-06	0.000177263
16661648	GMEB1	glucocorticoid modulatory element binding protein 1	ENSG00000162419	-0.0260767	-1.01824	0.720821	0.864666
16661663	YTHDF2	YTH N(6)-methyladenosine RNA binding protein 2	ENSG00000198492	-0.01633	-1.01138	0.781327	0.897659
16661676	OPRD1	opioid receptor, delta 1	ENSG00000116329	-0.00127167	-1.00088	0.988254	0.995487
16661687	EPB41	erythrocyte membrane protein band 4.1	ENSG00000159023	0.172622	1.1271	0.0328759	0.146341
16661730	PTPRU	protein tyrosine phosphatase, receptor type, U	ENSG00000060656	0.0202767	1.01415	0.782088	0.897995
16661792	MATN1-AS1	MATN1 antisense RNA 1	ENSG00000186056	0.230135	1.17294	0.0035073	0.0297996
16661808	LOC400748	uncharacterized LOC400748	ENSG00000235143	-0.0626583	-1.04439	0.448517	0.684234
16661817	ZCCHC17	zinc finger, CCHC domain containing 17	ENSG00000121766	-0.153278	-1.11209	0.0513228	0.196943
16661832	SERINC2	serine incorporator 2	ENSG00000168528	-0.0786983	-1.05606	0.233885	0.486191
16661852	LINC01225	long intergenic non-protein coding RNA 1225	ENSG00000260386	-0.0269733	-1.01887	0.706434	0.855914
16661856	LINC01226	long intergenic non-protein coding RNA 1226	ENSG00000223907	-0.154628	-1.11313	0.127529	0.343089
16661862	TINAGL1	tubulointerstitial nephritis antigen-like 1	ENSG00000142910	-0.107938	-1.07769	0.0901314	0.27871
16661890	HCRTR1	hypocretin (orexin) receptor 1	ENSG00000121764	-0.042125	-1.02963	0.602584	0.791048
16661917	KHDRBS1	KH domain containing, RNA binding, signal transduction associated 1	ENSG00000121774	0.0248167	1.01735	0.663175	0.830454
16661934	TMEM39B	transmembrane protein 39B	ENSG00000121775	-0.154523	-1.11305	0.0955202	0.288933
16661956	KPNA6	karyopherin alpha 6 (importin alpha 7)	ENSG00000025800	0.04866	1.0343	0.390551	0.639129
16661978	TXLNA	taxilin alpha	ENSG00000084652	0.138738	1.10094	0.0461078	0.183183
16661995	CCDC28B	coiled-coil domain containing 28B	ENSG00000160050	-0.0356033	-1.02499	0.644368	0.818994
16662009	IQCC	IQ motif containing C	ENSG00000160051	-0.03067	-1.02149	0.734314	0.871444
16662018	DCDC2B	doublecortin domain containing 2B	ENSG00000222046	0.0574467	1.04062	0.593156	0.785001
16662031	EIF3I	eukaryotic translation initiation factor 3, subunit I	ENSG00000084623	-0.0738117	-1.05249	0.209513	0.458259
16662047	FAM167B	family with sequence similarity 167, member B	ENSG00000183615	-0.148457	-1.10838	0.0669038	0.232076
16662052	LCK	LCK proto-oncogene, Src family tyrosine kinase	ENSG00000182866	-0.124555	-1.09017	0.120281	0.33138
16662077	HDAC1	histone deacetylase 1	ENSG00000116478	-0.0560183	-1.03959	0.404956	0.651843
16662105	TSSK3	testis-specific serine kinase 3	ENSG00000162526	0.45335	1.36922	0.00147714	0.0155363
16662108	TSSK3	testis-specific serine kinase 3	ENSG00000162526	0.17111	1.12592	0.027043	0.127641
16662113	ZBTB8B	zinc finger and BTB domain containing 8B	ENSG00000273274	-0.02145	-1.01498	0.860337	0.938925
16662123	ZBTB8A	zinc finger and BTB domain containing 8A	ENSG00000160062	-0.365825	-1.28862	0.00157675	0.0163238
16662134	RBBP4	retinoblastoma binding protein 4	ENSG00000162521	-0.076055	-1.05413	0.228152	0.47935
16662159	KIAA1522	KIAA1522	ENSG00000162522	0.0787367	1.05609	0.231113	0.482584
16662171	S100PBP	S100P binding protein	ENSG00000116497	0.611672	1.52803	6.91016e-08	6.51589e-06
16662193	HPCA			0.120275	1.08694	0.131922	0.350159
16662209	AZIN2	antizyme inhibitor 2	ENSG00000142920	-0.06114	-1.04329	0.317579	0.571499
16662234	ZNF362	zinc finger protein 362	ENSG00000160094	0.0327033	1.02293	0.697371	0.850001
16662251	LOC101929464	uncharacterized LOC101929464	ENSG00000233246	0.160675	1.11781	0.108214	0.310881
16662255	ZSCAN20	zinc finger and SCAN domain containing 20	ENSG00000121903	0.224817	1.16863	0.00974015	0.063134
16662270	HMGB4	high mobility group box 4	ENSG00000176256	0.00865	1.00601	0.902487	0.957467
16662280	HMGB4	high mobility group box 4	ENSG00000176256	-0.060915	-1.04313	0.512353	0.729411
16662282	CSMD2-AS1	CSMD2 antisense RNA 1	ENSG00000231163	-0.0827817	-1.05906	0.290541	0.544242
16662296	RN5S42			-0.116992	-1.08447	0.259005	0.513526
16662298	C1orf94	chromosome 1 open reading frame 94	ENSG00000142698	-0.10703	-1.07701	0.183118	0.42416
16662313	GJB5	gap junction protein, beta 5, 31.1kDa	ENSG00000189280	-0.175677	-1.12949	0.0463762	0.18398
16662317	GJB4	gap junction protein, beta 4, 30.3kDa	ENSG00000189433	-0.238852	-1.18005	0.0263573	0.125357
16662322	GJB3	gap junction protein, beta 3, 31kDa	ENSG00000188910	0.01259	1.00876	0.899212	0.956431
16662329	GJA4	gap junction protein, alpha 4, 37kDa	ENSG00000187513	-0.0851983	-1.06083	0.290475	0.544195
16662338	ZMYM1	zinc finger, MYM-type 1	ENSG00000197056	0.126178	1.0914	0.102771	0.30084
16662359	ZMYM4	zinc finger, MYM-type 4	ENSG00000146463	0.0837833	1.05979	0.208273	0.456552
16662396	NCDN	neurochondrin	ENSG00000020129	0.103802	1.0746	0.195088	0.439349
16662412	TFAP2E	transcription factor AP-2 epsilon (activating enhancer binding protein 2 epsilon)	ENSG00000116819	-0.0888033	-1.06349	0.262669	0.517437
16662430	AGO4	argonaute RISC catalytic component 4	ENSG00000134698	0.497057	1.41133	3.836e-06	0.000152605
16662453	AGO1	argonaute RISC catalytic component 1	ENSG00000092847	0.056055	1.03962	0.384524	0.633571
16662475	AGO3	argonaute RISC catalytic component 3	ENSG00000126070	0.178608	1.13179	0.0711556	0.241291
16662510	TEKT2	tektin 2 (testicular)	ENSG00000092850	-0.0542883	-1.03835	0.394358	0.642114
16662525	ADPRHL2	ADP-ribosylhydrolase like 2	ENSG00000116863	-0.20338	-1.15139	0.0514027	0.197049
16662537	MAP7D1	MAP7 domain containing 1	ENSG00000116871	-0.136992	-1.09961	0.0526672	0.199991
16662566	THRAP3	thyroid hormone receptor associated protein 3	ENSG00000054118	-0.0324517	-1.02275	0.653752	0.824812
16662584	SH3D21	SH3 domain containing 21	ENSG00000214193	0.151608	1.11081	0.0964567	0.29011
16662619	MIR4255	microRNA 4255	ENSG00000264698	0.08789	1.06281	0.335032	0.588206
16662623	ZC3H12A			-0.0920983	-1.06592	0.214918	0.464388
16662636	DNALI1	dynein, axonemal, light intermediate chain 1	ENSG00000163879	-0.0245117	-1.01714	0.707884	0.856447
16662648	CDCA8	cell division cycle associated 8	ENSG00000134690	-0.295455	-1.22727	0.000210263	0.00337202
16662664	MANEAL	mannosidase, endo-alpha-like	ENSG00000185090	-0.132295	-1.09604	0.0255412	0.122663
16662676	C1orf122	chromosome 1 open reading frame 122	ENSG00000197982	-0.0245933	-1.01719	0.702778	0.853016
16662685	INPP5B	inositol polyphosphate-5-phosphatase B	ENSG00000204084	-0.010265	-1.00714	0.922996	0.967009
16662692	UTP11L	UTP11-like, U3 small nucleolar ribonucleoprotein (yeast)	ENSG00000183520	-0.0898417	-1.06425	0.114255	0.321163
16662710	MIR3659	microRNA 3659	ENSG00000265596	-0.0389417	-1.02736	0.547655	0.754345
16662737	AKIRIN1	akirin 1	ENSG00000174574	0.113658	1.08197	0.0822112	0.263573
16662744	NDUFS5			-0.242307	-1.18288	0.0104934	0.0662297
16662755	MACF1	microtubule-actin crosslinking factor 1	ENSG00000127603	0.284107	1.21766	0.0029755	0.0264423
16662885	KIAA0754	KIAA0754	ENSG00000127603	0.01531	1.01067	0.890823	0.951666
16662890	BMP8A	bone morphogenetic protein 8a	ENSG00000183682	0.23171	1.17423	0.0612486	0.219393
16662900	LOC100506950			0.224728	1.16856	0.0201167	0.104903
16662908	PPIE	peptidylprolyl isomerase E (cyclophilin E)	ENSG00000084072	0.02532	1.01771	0.706742	0.855915
16662945	MFSD2A	major facilitator superfamily domain containing 2A	ENSG00000168389	-0.0759267	-1.05404	0.303974	0.557663
16662968	CAP1	CAP, adenylate cyclase-associated protein 1 (yeast)	ENSG00000131236	-0.136535	-1.09926	0.0280482	0.130955
16662993	RLF	rearranged L-myc fusion	ENSG00000117000	-0.08002	-1.05703	0.200339	0.446484
16663007	TMCO2	transmembrane and coiled-coil domains 2	ENSG00000188800	-0.004915	-1.00341	0.955502	0.980444
16663014	ZMPSTE24	zinc metallopeptidase STE24	ENSG00000084073	-0.02166	-1.01513	0.758876	0.885851
16663033	SMAP2	small ArfGAP2	ENSG00000084070	0.0657567	1.04663	0.239663	0.492301
16663051	ZFP69B	ZFP69 zinc finger protein B	ENSG00000187801	0.292405	1.22468	0.0242548	0.118459
16663064	ZFP69	ZFP69 zinc finger protein	ENSG00000187815	0.0137367	1.00957	0.87191	0.943606
16663075	EXO5	exonuclease 5	ENSG00000164002	0.106998	1.07699	0.125037	0.339535
16663085	ZNF684	zinc finger protein 684	ENSG00000117010	0.02759	1.01931	0.750268	0.880597
16663094	NFYC			0.124537	1.09016	0.0932245	0.284728
16663129	MIR30E	microRNA 30e		0.402608	1.3219	0.000528445	0.00691527
16663131	MIR30C1	microRNA 30c-1	ENSG00000207962	-0.051845	-1.03659	0.561576	0.763797
16663133	KCNQ4	potassium channel, voltage gated KQT-like subfamily Q, member 4	ENSG00000117013	-0.175848	-1.12963	0.0418428	0.172372
16663155	CTPS1	CTP synthase 1	ENSG00000171793	0.03347	1.02347	0.630777	0.81049
16663188	SLFNL1-AS1	SLFNL1 antisense RNA 1	ENSG00000281207	0.269952	1.20577	0.00397171	0.0325481
16663193	LOC102723924	uncharacterized LOC102723924	ENSG00000235358	0.17633	1.13001	0.222508	0.473341
16663199	FOXO6	forkhead box O6	ENSG00000204060	-0.0238083	-1.01664	0.760204	0.886395
16663218	GUCA2B	guanylate cyclase activator 2B (uroguanylin)	ENSG00000044012	0.069135	1.04909	0.399826	0.647017
16663223	RIMKLA	ribosomal modification protein rimK-like family member A	ENSG00000177181	-0.186722	-1.13817	0.120969	0.332611
16663231	PPCS	phosphopantothenoylcysteine synthetase	ENSG00000127125	0.117462	1.08482	0.131239	0.349323
16663242	CCDC30	coiled-coil domain containing 30	ENSG00000186409	0.08046	1.05736	0.359672	0.611534
16663282	CCDC30	coiled-coil domain containing 30	ENSG00000186409	0.21248	1.15868	0.0605735	0.217774
16663284	CCDC30	coiled-coil domain containing 30	ENSG00000186409	-0.00881833	-1.00613	0.947089	0.976958
16663286	CCDC30	coiled-coil domain containing 30	ENSG00000186409	0.100975	1.0725	0.375381	0.625712
16663288	CCDC30	coiled-coil domain containing 30	ENSG00000186409	-0.081235	-1.05792	0.285418	0.54018
16663291	CCDC30	coiled-coil domain containing 30	ENSG00000186409	-0.052455	-1.03703	0.589746	0.782677
16663294	PPIH	peptidylprolyl isomerase H (cyclophilin H)	ENSG00000171960	0.0747433	1.05317	0.309657	0.564091
16663314	PPIH	peptidylprolyl isomerase H (cyclophilin H)	ENSG00000171960	-0.107568	-1.07741	0.252578	0.50671
16663317	YBX1	Y box binding protein 1	ENSG00000065978	-0.0512033	-1.03613	0.460837	0.692919
16663332	C1orf50			0.103623	1.07447	0.132727	0.351417
16663345	LOC100129924			0.193373	1.14343	0.144551	0.370191
16663347	LOC100129924			0.01035	1.0072	0.909114	0.960614
16663358	ERMAP	erythroblast membrane-associated protein (Scianna blood group)	ENSG00000164010	0.480493	1.39522	4.76475e-06	0.000179943
16663376	ZNF691	zinc finger protein 691	ENSG00000164011	0.2065	1.15389	0.103334	0.301956
16663390	SLC2A1-AS1	SLC2A1 antisense RNA 1	ENSG00000227533	-0.1819	-1.13438	0.10038	0.296678
16663398	FAM183A			0.004995	1.00347	0.937188	0.97235
16663413	CFAP57	cilia and flagella associated protein 57	ENSG00000243710	-0.0361967	-1.02541	0.648824	0.822087
16663446	RN5S46			-0.245802	-1.18575	0.0393754	0.165526
16663448	TMEM125	transmembrane protein 125	ENSG00000179178	0.00731667	1.00508	0.916481	0.96409
16663457	TIE1	tyrosine kinase with immunoglobulin-like and EGF-like domains 1	ENSG00000066056	-0.0696883	-1.04949	0.31058	0.564976
16663498	MPL	MPL proto-oncogene, thrombopoietin receptor	ENSG00000117400	0.00806333	1.0056	0.89659	0.954746
16663514	CDC20	cell division cycle 20	ENSG00000117399	-0.426262	-1.34375	1.47479e-07	1.19414e-05
16663537	SZT2	seizure threshold 2 homolog (mouse)	ENSG00000198198	0.291458	1.22388	0.00157776	0.0163238
16663621	PTPRF	protein tyrosine phosphatase, receptor type, F	ENSG00000142949	-0.034915	-1.0245	0.621108	0.804075
16663665	KDM4A	lysine (K)-specific demethylase 4A	ENSG00000066135	0.444992	1.36131	2.55375e-07	1.83587e-05
16663694	ST3GAL3	ST3 beta-galactoside alpha-2,3-sialyltransferase 3	ENSG00000126091	0.392545	1.31271	0.000198824	0.0032251
16663730	ARTN	artemin	ENSG00000117407	0.0358567	1.02517	0.603708	0.791852
16663743	IPO13	importin 13	ENSG00000117408	0.130858	1.09494	0.0798581	0.258532
16663773	DPH2	DPH2 homolog	ENSG00000132768	-0.263337	-1.20025	0.00417597	0.0337945
16663792	ATP6V0B	ATPase, H+ transporting, lysosomal 21kDa, V0 subunit b	ENSG00000117410	-0.078405	-1.05585	0.207937	0.456286
16663812	B4GALT2	UDP-Gal:betaGlcNAc beta 1,4- galactosyltransferase, polypeptide 2	ENSG00000117411	-0.267007	-1.20331	0.000183905	0.00305453
16663828	CCDC24	coiled-coil domain containing 24	ENSG00000159214	0.05618	1.03971	0.395668	0.643303
16663851	KLF17	Kruppel-like factor 17	ENSG00000171872	-0.0574367	-1.04062	0.457639	0.690525
16663863	KLF17	Kruppel-like factor 17	ENSG00000171872	0.01444	1.01006	0.816788	0.916684
16663871	DMAP1	DNA methyltransferase 1 associated protein 1	ENSG00000178028	-0.045695	-1.03218	0.482686	0.70941
16663899	RNF220	ring finger protein 220	ENSG00000187147	-0.0720383	-1.0512	0.352664	0.604623
16663931	C1orf228	chromosome 1 open reading frame 228	ENSG00000198520	0.167925	1.12344	0.0319534	0.143564
16663958	KIF2C	kinesin family member 2C	ENSG00000142945	-0.125455	-1.09085	0.0370246	0.158691
16663989	SNORD38B			-0.0632383	-1.04481	0.284317	0.539231
16664003	SNORD46	small nucleolar RNA, C/D box 46	ENSG00000200913	0.144367	1.10525	0.0291819	0.134707
16664005	PLK3	polo-like kinase 3	ENSG00000173846	0.0501733	1.03539	0.551524	0.757142
16664028	BTBD19			0.0562033	1.03973	0.490152	0.714486
16664046	RN5S47			-0.0389383	-1.02736	0.658327	0.827764
16664048	UROD	uroporphyrinogen decarboxylase	ENSG00000126088	-0.121872	-1.08815	0.0640054	0.22546
16664072	LINC01144	long intergenic non-protein coding RNA 1144	ENSG00000281912	-0.0801333	-1.05712	0.271546	0.526432
16664074	HPDL	4-hydroxyphenylpyruvate dioxygenase-like	ENSG00000186603	-0.334533	-1.26097	0.000605493	0.0077135
16664078	TOE1	target of EGR1, member 1 (nuclear)	ENSG00000132773	-0.31144	-1.24095	1.6544e-05	0.000460713
16664091	MMACHC	methylmalonic aciduria (cobalamin deficiency) cblC type, with homocystinuria	ENSG00000132763	-0.234175	-1.17623	0.00777144	0.053715
16664100	AKR1A1	aldo-keto reductase family 1, member A1 (aldehyde reductase)	ENSG00000117448	0.08842	1.06321	0.270551	0.525117
16664118	NASP	nuclear autoantigenic sperm protein (histone-binding)	ENSG00000132780	-0.0850767	-1.06074	0.123669	0.336866
16664150	TMEM69	transmembrane protein 69	ENSG00000159596	-0.08235	-1.05874	0.226711	0.47782
16664156	MAST2	microtubule associated serine/threonine kinase 2	ENSG00000086015	0.0501117	1.03535	0.39296	0.640862
16664213	LOC100133124			0.013415	1.00934	0.843668	0.930274
16664215	LOC101929626	uncharacterized LOC101929626	ENSG00000227857	-0.218565	-1.16358	0.0242463	0.118449
16664218	TSPAN1	tetraspanin 1	ENSG00000117472	-0.0587267	-1.04155	0.299691	0.553448
16664235	LURAP1	leucine rich adaptor protein 1	ENSG00000171357	0.0145883	1.01016	0.828653	0.922938
16664243	RAD54L	RAD54-like (S. cerevisiae)	ENSG00000085999	-0.360388	-1.28377	3.02177e-05	0.000742901
16664272	UQCRHL			-0.00349667	-1.00243	0.962199	0.983522
16664281	NSUN4	NOP2/Sun domain family, member 4	ENSG00000117481	0.136365	1.09913	0.045951	0.182755
16664299	FAAH	fatty acid amide hydrolase	ENSG00000117480	0.124455	1.0901	0.126266	0.341443
16664322	FAAHP1	fatty acid amide hydrolase pseudogene 1		-0.118382	-1.08552	0.240294	0.492811
16664335	DMBX1	diencephalon/mesencephalon homeobox 1	ENSG00000197587	-0.238258	-1.17957	0.0202072	0.105228
16664341	MKNK1-AS1	MKNK1 antisense RNA 1	ENSG00000269956	0.040665	1.02859	0.57275	0.771855
16664350	TEX38	testis expressed 38	ENSG00000186118	-0.15265	-1.11161	0.0733925	0.245905
16664354	EFCAB14-AS1	EFCAB14 antisense RNA 1	ENSG00000228237	-0.0928717	-1.06649	0.342181	0.594518
16664359	CYP4B1	cytochrome P450, family 4, subfamily B, polypeptide 1	ENSG00000142973	-0.113123	-1.08157	0.14571	0.371746
16664388	CYP4X1	cytochrome P450, family 4, subfamily X, polypeptide 1	ENSG00000186377	-0.0918	-1.0657	0.158169	0.390881
16664406	CYP4Z1	cytochrome P450, family 4, subfamily Z, polypeptide 1	ENSG00000186160	-0.0785883	-1.05598	0.351506	0.603575
16664421	CYP4A22			-0.0398533	-1.02801	0.752373	0.881853
16664438	LINC00853	long intergenic non-protein coding RNA 853	ENSG00000224805	0.132137	1.09592	0.288486	0.542553
16664445	CMPK1	cytidine monophosphate (UMP-CMP) kinase 1, cytosolic	ENSG00000162368	0.0183067	1.01277	0.739429	0.874496
16664456	FOXE3	forkhead box E3	ENSG00000186790	-0.191528	-1.14197	0.00208494	0.0201378
16664460	FOXD2	forkhead box D2	ENSG00000186564	-0.14853	-1.10844	0.068431	0.235492
16664473	LOC105378702	uncharacterized LOC105378702		0.00221667	1.00154	0.973593	0.988971
16664486	SLC5A9	solute carrier family 5 (sodium/sugar cotransporter), member 9	ENSG00000117834	0.166948	1.12268	0.0223991	0.112798
16664522	LOC101929721	uncharacterized LOC101929721	ENSG00000230114	-0.01371	-1.00955	0.824135	0.920632
16664533	ELAVL4	ELAV like neuron-specific RNA binding protein 4	ENSG00000162374	-0.397388	-1.31712	2.58659e-06	0.000114182
16664569	CDKN2C	cyclin-dependent kinase inhibitor 2C (p18, inhibits CDK4)	ENSG00000123080	-0.198627	-1.14761	0.0193545	0.102253
16664579	MIR4421	microRNA 4421	ENSG00000265538	-0.211698	-1.15805	0.172376	0.409984
16664581	C1orf185	chromosome 1 open reading frame 185	ENSG00000204006	0.00262167	1.00182	0.982843	0.992611
16664599	RNF11	ring finger protein 11	ENSG00000123091	-0.0928767	-1.06649	0.274156	0.528897
16664610	TTC39A-AS1	TTC39A antisense RNA 1	ENSG00000261664	0.0623067	1.04413	0.319417	0.573415
16664624	OSBPL9	oxysterol binding protein-like 9	ENSG00000117859	0.0292483	1.02048	0.653019	0.824429
16664685	RN5S48			-0.0484183	-1.03413	0.461397	0.693335
16664694	BTF3L4	basic transcription factor 3-like 4	ENSG00000134717	0.236888	1.17845	0.0131203	0.0778313
16664708	ZFYVE9	zinc finger, FYVE domain containing 9	ENSG00000157077	0.45278	1.36868	4.18811e-06	0.000163128
16664731	PRPF38A	pre-mRNA processing factor 38A	ENSG00000134748	-0.127537	-1.09243	0.017302	0.0944052
16664748	GPX7	glutathione peroxidase 7	ENSG00000116157	0.100878	1.07243	0.191009	0.433648
16664754	FAM159A	family with sequence similarity 159, member A	ENSG00000182183	0.0236017	1.01649	0.739636	0.874612
16664765	ZYG11B	zyg-11 family member B, cell cycle regulator	ENSG00000162378	-0.0157233	-1.01096	0.838353	0.927605
16664782	ZYG11A	zyg-11 family member A, cell cycle regulator	ENSG00000203995	-0.0252333	-1.01764	0.699293	0.850772
16664802	SCP2	sterol carrier protein 2	ENSG00000116171	0.123423	1.08932	0.0347084	0.151777
16664828	PODN	podocan	ENSG00000174348	0.0109017	1.00759	0.889458	0.95114
16664852	CPT2	carnitine palmitoyltransferase 2	ENSG00000157184	-0.21553	-1.16113	0.0098147	0.0633916
16664861	LOC100507564	uncharacterized LOC100507564	ENSG00000226754	-0.116387	-1.08402	0.183746	0.425051
16664878	LOC105378732	uncharacterized LOC105378732	ENSG00000225675	0.276925	1.21161	0.000229781	0.00361117
16664887	DMRTB1	DMRT-like family B with proline-rich C-terminal, 1	ENSG00000143006	0.0286133	1.02003	0.730695	0.869391
16664897	DIO1	deiodinase, iodothyronine, type I	ENSG00000211452	0.0102083	1.0071	0.910934	0.961183
16664912	LRRC42	leucine rich repeat containing 42	ENSG00000116212	-0.21856	-1.16357	0.0171532	0.0938514
16664932	TCEANC2	transcription elongation factor A (SII) N-terminal and central domain containing 2	ENSG00000116205	0.134627	1.09781	0.0990244	0.294445
16664947	MRPL37	mitochondrial ribosomal protein L37	ENSG00000116221	0.153165	1.11201	0.0374143	0.159696
16664963	SSBP3-AS1	SSBP3 antisense RNA 1	ENSG00000198711	0.014945	1.01041	0.8589	0.938112
16664967	LOC100653134			-0.151938	-1.11106	0.040968	0.169781
16664978	ACOT11	acyl-CoA thioesterase 11	ENSG00000162390	-0.066005	-1.04681	0.468581	0.699372
16665006	HEATR8-TTC4			0.11127	1.08018	0.0929046	0.284159
16665069	LEXM	lymphocyte expansion molecule	ENSG00000162398	-0.113747	-1.08203	0.153016	0.382958
16665094	TMEM61	transmembrane protein 61	ENSG00000143001	0.0284033	1.01988	0.745819	0.877915
16665102	BSND	barttin CLCNK-type chloride channel accessory beta subunit	ENSG00000162399	-0.100695	-1.07229	0.166934	0.402803
16665109	PCSK9	proprotein convertase subtilisin/kexin type 9	ENSG00000169174	-0.007635	-1.00531	0.908257	0.960168
16665132	LOC100507634	uncharacterized LOC100507634		-0.0173733	-1.01212	0.808987	0.912423
16665139	MIR4422	microRNA 4422	ENSG00000265822	-0.171732	-1.12641	0.0256587	0.123037
16665182	PRKAA2	protein kinase, AMP-activated, alpha 2 catalytic subunit	ENSG00000162409	-0.0669167	-1.04748	0.534098	0.744853
16665193	C8A	complement component 8, alpha polypeptide	ENSG00000157131	-0.169682	-1.12481	0.0211788	0.108524
16665214	LOC105378749	uncharacterized LOC105378749		-0.01299	-1.00904	0.84178	0.929364
16665224	DAB1-AS1	DAB1 antisense RNA 1	ENSG00000226759	-0.0147667	-1.01029	0.836353	0.926787
16665232	DAB1-AS1	DAB1 antisense RNA 1	ENSG00000226759	-0.0628917	-1.04456	0.259767	0.514172
16665247	LINC01135	long intergenic non-protein coding RNA 1135	ENSG00000234807	-0.12325	-1.08919	0.114716	0.322047
16665254	LINC01358	long intergenic non-protein coding RNA 1358		0.0516033	1.03642	0.465706	0.696973
16665266	FGGY	FGGY carbohydrate kinase domain containing	ENSG00000172456	-0.123027	-1.08902	0.118204	0.32819
16665298	LOC101926944	uncharacterized LOC101926944	ENSG00000231816	-0.00689167	-1.00479	0.935856	0.972101
16665302	HOOK1	hook microtubule-tethering protein 1	ENSG00000134709	-0.190517	-1.14117	0.00588825	0.043721
16665346	NFIA	nuclear factor I/A	ENSG00000162599	0.117015	1.08449	0.107593	0.309724
16665373	INADL	InaD-like (Drosophila)	ENSG00000132849	-0.0739683	-1.05261	0.188619	0.430211
16665437	MIR3116-1			-0.136825	-1.09948	0.232888	0.484966
16665439	L1TD1	LINE-1 type transposase domain containing 1	ENSG00000240563	-0.0667217	-1.04733	0.450523	0.685749
16665447	USP1	ubiquitin specific peptidase 1	ENSG00000162607	-0.241377	-1.18212	0.00047315	0.00632784
16665461	ANGPTL3	angiopoietin-like 3	ENSG00000132855	-0.159452	-1.11686	0.0793395	0.257571
16665472	LOC400756	uncharacterized LOC400756		-0.07686	-1.05472	0.25422	0.508287
16665475	ATG4C	autophagy related 4C, cysteine peptidase	ENSG00000125703	0.109655	1.07897	0.159638	0.39314
16665507	FOXD3	forkhead box D3	ENSG00000187140	-0.16444	-1.12073	0.153357	0.383575
16665512	ALG6	ALG6, alpha-1,3-glucosyltransferase	ENSG00000088035	0.179497	1.13249	0.0216275	0.110047
16665536	EFCAB7	EF-hand calcium binding domain 7	ENSG00000203965	0.1686	1.12397	0.0807404	0.260568
16665558	DLEU2L	deleted in lymphocytic leukemia 2-like		0.352915	1.27714	0.030638	0.139377
16665566	PGM1	phosphoglucomutase 1	ENSG00000079739	-0.16794	-1.12345	0.0143959	0.0830341
16665588	ROR1	receptor tyrosine kinase-like orphan receptor 1	ENSG00000185483	-0.05424	-1.03831	0.438691	0.676798
16665606	UBE2U	ubiquitin-conjugating enzyme E2U (putative)	ENSG00000177414	-0.0760183	-1.0541	0.376421	0.626674
16665621	CACHD1	cache domain containing 1	ENSG00000158966	-0.277712	-1.21227	0.00309064	0.0271018
16665654	MIR4794	microRNA 4794	ENSG00000264470	-0.00417833	-1.0029	0.937999	0.9727
16665656	RAVER2	ribonucleoprotein, PTB-binding 2	ENSG00000162437	0.306433	1.23665	0.000254914	0.00391127
16665674	AK4	adenylate kinase 4	ENSG00000162433	-0.196553	-1.14596	0.0173667	0.0946542
16665687	DNAJC6	DnaJ (Hsp40) homolog, subfamily C, member 6	ENSG00000116675	0.0852433	1.06087	0.255625	0.509829
16665717	LEPR			-0.115778	-1.08356	0.132479	0.351019
16665757	PDE4B	phosphodiesterase 4B, cAMP-specific	ENSG00000184588	0.0523	1.03692	0.432631	0.672848
16665796	SGIP1	SH3-domain GRB2-like (endophilin) interacting protein 1	ENSG00000118473	-0.02823	-1.01976	0.66455	0.831476
16665833	MIR3117	microRNA 3117		-0.0887517	-1.06345	0.331885	0.585436
16665835	TCTEX1D1	Tctex1 domain containing 1	ENSG00000152760	0.166953	1.12269	0.0357801	0.155365
16665853	MIER1	mesoderm induction early response 1, transcriptional regulator	ENSG00000198160	0.01579	1.011	0.771187	0.892494
16665878	IL23R	interleukin 23 receptor	ENSG00000162594	0.282492	1.21629	0.000322059	0.00470181
16665901	IL12RB2	interleukin 12 receptor, beta 2	ENSG00000081985	0.30311	1.2338	8.68371e-05	0.0017113
16665932	GADD45A	growth arrest and DNA-damage-inducible, alpha	ENSG00000116717	0.423912	1.34156	4.88399e-07	3.0767e-05
16665941	GNG12-AS1	GNG12 antisense RNA 1	ENSG00000232284	-0.0416533	-1.02929	0.607333	0.794567
16665963	DEPDC1-AS1	DEPDC1 antisense RNA 1	ENSG00000234264	-0.405403	-1.32446	0.000125648	0.00229323
16665976	LRRC7	leucine rich repeat containing 7	ENSG00000033122	-0.0948183	-1.06793	0.141328	0.365554
16666007	PIN1P1	peptidylprolyl cis/trans isomerase, NIMA-interacting 1 pseudogene 1	ENSG00000229359	-0.15138	-1.11063	0.0947001	0.287409
16666009	LRRC7	leucine rich repeat containing 7	ENSG00000033122	0.101495	1.07288	0.184268	0.425597
16666013	SRSF11	serine/arginine-rich splicing factor 11	ENSG00000116754	0.27803	1.21254	0.000261866	0.00400144
16666045	HHLA3	HERV-H LTR-associating 3	ENSG00000197568	0.517955	1.43192	1.82421e-05	0.000498222
16666055	CTH	cystathionine gamma-lyase	ENSG00000116761	1.99343	3.98183	3.77095e-17	3.46788e-13
16666071	LOC101927244	uncharacterized LOC101927244	ENSG00000229051	-0.230103	-1.17292	0.0306816	0.139554
16666086	ZRANB2-AS1	ZRANB2 antisense RNA 1		0.11272	1.08126	0.105313	0.305402
16666091	ZRANB2-AS2	ZRANB2 antisense RNA 2 (head to head)	ENSG00000229956	0.0475517	1.03351	0.486809	0.711924
16666105	ZRANB2-AS2	ZRANB2 antisense RNA 2 (head to head)	ENSG00000229956	0.235253	1.17711	0.00721744	0.0507883
16666115	LOC339468	uncharacterized LOC339468		-0.126982	-1.09201	0.108439	0.311244
16666126	LINC01360	long intergenic non-protein coding RNA 1360	ENSG00000233973	-0.0294967	-1.02066	0.71921	0.863533
16666143	FPGT-TNNI3K			0.255193	1.1935	0.000144878	0.00255591
16666200	ERICH3-AS1	ERICH3 antisense RNA 1	ENSG00000234497	-0.09408	-1.06738	0.235359	0.487725
16666204	TYW3	tRNA-yW synthesizing protein 3 homolog (S. cerevisiae)	ENSG00000162623	0.127517	1.09241	0.059725	0.215712
16666224	LHX8	LIM homeobox 8	ENSG00000162624	-0.11746	-1.08482	0.093667	0.285582
16666239	ACADM	acyl-CoA dehydrogenase, C-4 to C-12 straight chain	ENSG00000117054	0.121818	1.08811	0.0913124	0.281311
16666266	ACADM	acyl-CoA dehydrogenase, C-4 to C-12 straight chain	ENSG00000117054	0.0325133	1.02279	0.659973	0.828532
16666268	RABGGTB			-0.00592667	-1.00412	0.921071	0.966305
16666296	MSH4	mutS homolog 4	ENSG00000057468	0.0218233	1.01524	0.722001	0.865472
16666319	LOC101927342	uncharacterized LOC101927342	ENSG00000225605	-0.055095	-1.03893	0.412493	0.657978
16666326	ST6GALNAC3	ST6 (alpha-N-acetyl-neuraminyl-2,3-beta-galactosyl-1,3)-N-acetylgalactosaminide alpha-2,6-sialyltransferase 3	ENSG00000184005	0.0831467	1.05933	0.256098	0.510262
16666336	ST6GALNAC5	ST6 (alpha-N-acetyl-neuraminyl-2,3-beta-galactosyl-1,3)-N-acetylgalactosaminide alpha-2,6-sialyltransferase 5	ENSG00000117069	-0.165905	-1.12187	0.0116172	0.0714314
16666357	AK5	adenylate kinase 5	ENSG00000154027	0.140775	1.1025	0.0486912	0.189753
16666390	RN5S20			-0.125162	-1.09063	0.143115	0.368124
16666392	FAM73A	family with sequence similarity 73, member A	ENSG00000180488	0.391647	1.31189	0.000203365	0.00328082
16666416	NEXN	nexilin (F actin binding protein)	ENSG00000162614	0.162382	1.11913	0.0245465	0.119336
16666437	DNAJB4	DnaJ (Hsp40) homolog, subfamily B, member 4	ENSG00000162616	0.49829	1.41254	5.32899e-05	0.00116842
16666448	GIPC2	GIPC PDZ domain containing family, member 2	ENSG00000137960	-0.0370767	-1.02603	0.683903	0.843675
16666458	MGC27382	uncharacterized MGC27382	ENSG00000237413	0.02648	1.01852	0.69928	0.850772
16666471	PTGFR	prostaglandin F receptor (FP)	ENSG00000122420	0.05126	1.03617	0.461524	0.693426
16666485	IFI44L	interferon-induced protein 44-like	ENSG00000137959	-0.09801	-1.0703	0.12671	0.342145
16666509	IFI44	interferon-induced protein 44	ENSG00000137965	-0.101435	-1.07284	0.210734	0.459212
16666537	LOC101927412	uncharacterized LOC101927412	ENSG00000234184	-0.0607583	-1.04301	0.47933	0.707344
16666545	ADGRL2	adhesion G protein-coupled receptor L2	ENSG00000117114	-0.03361	-1.02357	0.588921	0.781865
16666590	LINC01362	long intergenic non-protein coding RNA 1362		-0.0707717	-1.05028	0.289433	0.543157
16666603	LOC101927542	uncharacterized LOC101927542		-0.194948	-1.14468	0.0425613	0.173869
16666616	PRKACB	protein kinase, cAMP-dependent, catalytic, beta	ENSG00000142875	-0.00627833	-1.00436	0.925067	0.96781
16666640	SAMD13	sterile alpha motif domain containing 13	ENSG00000203943	0.036075	1.02532	0.622552	0.804925
16666657	DNASE2B	deoxyribonuclease II beta	ENSG00000137976	-0.192333	-1.14261	0.0610935	0.219114
16666668	RPF1	ribosome production factor 1 homolog	ENSG00000117133	-0.0984067	-1.07059	0.161441	0.395271
16666681	SPATA1	spermatogenesis associated 1		-0.016975	-1.01184	0.787426	0.900931
16666694	WDR63	WD repeat domain 63	ENSG00000162643	-0.152722	-1.11166	0.0522623	0.199087
16666723	MIR4423	microRNA 4423	ENSG00000266110	0.107215	1.07715	0.166346	0.402125
16666730	LOC646626	uncharacterized LOC646626		-0.0477233	-1.03363	0.480587	0.708332
16666738	CYR61	cysteine-rich, angiogenic inducer, 61	ENSG00000142871	-0.0931617	-1.06671	0.159933	0.393352
16666755	CLCA2	chloride channel accessory 2	ENSG00000137975	0.0208933	1.01459	0.724135	0.866652
16666775	CLCA1	chloride channel accessory 1	ENSG00000016490	-0.0863217	-1.06166	0.24342	0.496488
16666799	CLCA4	chloride channel accessory 4	ENSG00000016602	-0.0878217	-1.06276	0.178091	0.417789
16666819	CLCA3P	chloride channel accessory 3, pseudogene	ENSG00000153923	-0.184923	-1.13676	0.0296338	0.13616
16666835	SH3GLB1	SH3-domain GRB2-like endophilin B1	ENSG00000097033	0.373223	1.29524	1.00305e-05	0.000315607
16666851	HS2ST1	heparan sulfate 2-O-sulfotransferase 1	ENSG00000153936	-0.217947	-1.16308	0.00737458	0.0515701
16666862	LOC339524			-0.137043	-1.09965	0.0927654	0.284054
16666865	LINC01140	long intergenic non-protein coding RNA 1140	ENSG00000267272	0.0854067	1.06099	0.307312	0.561399
16666881	LMO4	LIM domain only 4	ENSG00000143013	0.26167	1.19887	0.00582178	0.0434142
16666890	LOC101927871	uncharacterized LOC101927871		-0.180202	-1.13304	0.0407787	0.169364
16666896	PKN2	protein kinase N2	ENSG00000065243	0.137668	1.10013	0.0728759	0.244784
16666943	GBP6	guanylate binding protein family, member 6	ENSG00000183347	0.053015	1.03743	0.595705	0.786905
16666959	GBP1P1	guanylate binding protein 1, interferon-inducible pseudogene 1	ENSG00000225492	-0.17985	-1.13277	0.108076	0.3107
16666965	LRRC8B	leucine rich repeat containing 8 family, member B	ENSG00000197147	0.123977	1.08973	0.13992	0.362982
16666982	LRRC8C	leucine rich repeat containing 8 family, member C	ENSG00000171488	0.131868	1.09571	0.196532	0.4411
16666997	LOC101927975	uncharacterized LOC101927975		-0.0187067	-1.01305	0.842861	0.929796
16667000	LRRC8D	leucine rich repeat containing 8 family, member D	ENSG00000171492	0.614285	1.5308	2.37186e-06	0.00010692
16667011	ZNF326	zinc finger protein 326	ENSG00000162664	-0.0603217	-1.0427	0.385457	0.634358
16667037	CDC7	cell division cycle 7	ENSG00000097046	-0.106802	-1.07684	0.0754635	0.249911
16667056	HSP90B3P	heat shock protein 90kDa beta (Grp94), member 3, pseudogene		0.0152967	1.01066	0.869657	0.942814
16667060	BRDT	bromodomain, testis-specific	ENSG00000137948	-0.083875	-1.05986	0.159771	0.393153
16667094	EPHX4	epoxide hydrolase 4	ENSG00000172031	-0.19107	-1.14161	0.0172131	0.0940582
16667105	BTBD8	BTB (POZ) domain containing 8	ENSG00000189195	0.108167	1.07786	0.267628	0.521996
16667119	KIAA1107	KIAA1107	ENSG00000069712	0.336925	1.26306	0.000209913	0.00337003
16667130	C1orf146	chromosome 1 open reading frame 146	ENSG00000203910	-0.121872	-1.08815	0.134373	0.354202
16667140	RPAP2	RNA polymerase II associated protein 2	ENSG00000122484	0.2779	1.21243	9.95949e-05	0.00190233
16667155	RPL5			0.0719833	1.05116	0.18659	0.428273
16667175	SNORA66			-0.00138667	-1.00096	0.992282	0.997188
16667183	MTF2	metal response element binding transcription factor 2	ENSG00000143033	0.0189383	1.01321	0.714559	0.860654
16667206	CCDC18	coiled-coil domain containing 18	ENSG00000122483	0.143613	1.10467	0.0435258	0.176725
16667247	DR1	down-regulator of transcription 1	ENSG00000117505	0.0418283	1.02942	0.496504	0.718835
16667258	FNBP1L	formin binding protein 1-like	ENSG00000137942	0.01522	1.01061	0.86759	0.941976
16667277	LOC100129046	uncharacterized LOC100129046		0.061245	1.04337	0.36771	0.618984
16667286	MIR760	microRNA 760		-0.0838517	-1.05984	0.430163	0.671147
16667303	ABCD3	ATP-binding cassette, sub-family D (ALD), member 3	ENSG00000117528	-0.111568	-1.0804	0.102613	0.300584
16667346	SLC44A3	solute carrier family 44, member 3	ENSG00000143036	-0.0877133	-1.06268	0.262435	0.517147
16667368	LOC729970	hCG2028352-like	ENSG00000235501	-0.065325	-1.04632	0.374522	0.624944
16667379	LOC101928098	uncharacterized LOC101928098	ENSG00000230427	0.00520833	1.00362	0.947314	0.977015
16667385	RWDD3			0.0296867	1.02079	0.64357	0.818632
16667422	FLJ31662	uncharacterized LOC440594	ENSG00000233907	0.0319933	1.02242	0.76466	0.888465
16667427	LOC100996635	uncharacterized LOC100996635	ENSG00000228971	-0.0739417	-1.05259	0.416533	0.660956
16667440	LOC102723661	uncharacterized LOC102723661	ENSG00000237435	-0.00781	-1.00543	0.923855	0.967254
16667456	PTBP2	polypyrimidine tract binding protein 2	ENSG00000117569	0.260098	1.19756	0.0230284	0.114677
16667481	DPYD-AS1	DPYD antisense RNA 1	ENSG00000232878	0.000461667	1.00032	0.995027	0.998075
16667487	DPYD-AS2	DPYD antisense RNA 2	ENSG00000235777	-0.0238867	-1.01669	0.780518	0.897307
16667492	LOC729987	uncharacterized LOC729987	ENSG00000226053	-0.039405	-1.02769	0.734867	0.87166
16667498	SNX7	sorting nexin 7	ENSG00000162627	-0.08018	-1.05715	0.196762	0.441451
16667512	LOC100129620	uncharacterized LOC100129620	ENSG00000232825	-0.077415	-1.05513	0.340019	0.592904
16667516	LPPR4	lipid phosphate phosphatase-related protein type 4	ENSG00000117600	0.0264183	1.01848	0.757443	0.885213
16667530	PALMD	palmdelphin	ENSG00000099260	-0.173517	-1.1278	0.0406626	0.168985
16667546	AGL	amylo-alpha-1, 6-glucosidase, 4-alpha-glucanotransferase	ENSG00000162688	0.124822	1.09037	0.106045	0.306749
16667590	SLC35A3	solute carrier family 35 (UDP-N-acetylglucosamine (UDP-GlcNAc) transporter), member A3	ENSG00000117620	0.107675	1.07749	0.0729225	0.244858
16667608	HIAT1	hippocampus abundant transcript 1	ENSG00000156875	-0.127857	-1.09267	0.0816686	0.262452
16667625	TRMT13	tRNA methyltransferase 13 homolog (S. cerevisiae)	ENSG00000122435	0.251738	1.19064	0.000314357	0.00461433
16667644	RTCA	RNA 3'-terminal phosphate cyclase	ENSG00000137996	0.479997	1.39474	1.23533e-08	1.66558e-06
16667660	MIR553	microRNA 553	ENSG00000207750	0.204557	1.15233	0.183731	0.425051
16667662	CDC14A	cell division cycle 14A	ENSG00000079335	0.0108467	1.00755	0.867513	0.941952
16667694	GPR88	G protein-coupled receptor 88	ENSG00000181656	-0.0992633	-1.07123	0.163109	0.397406
16667702	VCAM1	vascular cell adhesion molecule 1	ENSG00000162692	-0.0519233	-1.03665	0.389811	0.638514
16667715	SLC30A7	solute carrier family 30 (zinc transporter), member 7	ENSG00000162695	0.03085	1.02161	0.565137	0.766507
16667733	SLC30A7	solute carrier family 30 (zinc transporter), member 7	ENSG00000162695	0.0553083	1.03908	0.641579	0.817521
16667736	LOC102606465	uncharacterized LOC102606465		0.548703	1.46277	2.29238e-07	1.68241e-05
16667752	LOC101928334	uncharacterized LOC101928334		-0.03621	-1.02542	0.595845	0.786915
16667760	S1PR1	sphingosine-1-phosphate receptor 1	ENSG00000170989	-0.0806183	-1.05747	0.284975	0.539754
16667783	DNAJA1P5	DnaJ (Hsp40) homolog, subfamily A, member 1 pseudogene 5		-0.28056	-1.21467	0.0243072	0.11856
16667801	RNPC3	RNA-binding region (RNP1, RRM) containing 3	ENSG00000185946	0.349767	1.27435	1.09102e-05	0.000336883
16667830	AMY2B			0.217157	1.16244	0.0253083	0.121847
16667850	AMY2A	amylase, alpha 2A (pancreatic)	ENSG00000243480	-0.229243	-1.17222	0.064889	0.227524
16667863	AMY1A			0.38227	1.30339	8.09655e-06	0.000270766
16667881	AMY1A			0.476845	1.3917	1.31778e-06	6.76951e-05
16667895	LOC100129138	THAP domain containing, apoptosis associated protein 3 pseudogene	ENSG00000215869	-0.0793433	-1.05654	0.479101	0.707161
16667918	PRMT6	protein arginine methyltransferase 6	ENSG00000198890	-0.195907	-1.14544	0.109594	0.312943
16667925	NTNG1	netrin G1	ENSG00000162631	-0.14361	-1.10467	0.0196683	0.103416
16667948	VAV3-AS1	VAV3 antisense RNA 1	ENSG00000230489	-0.0903667	-1.06464	0.212369	0.461154
16667999	LOC400768	uncharacterized LOC400768		0.00982	1.00683	0.88629	0.949491
16668002	FAM102B	family with sequence similarity 102, member B	ENSG00000162636	-0.0374133	-1.02627	0.556668	0.760455
16668020	PRPF38B	pre-mRNA processing factor 38B	ENSG00000134186	-0.108063	-1.07778	0.0851126	0.269025
16668033	FNDC7	fibronectin type III domain containing 7	ENSG00000143107	-0.166275	-1.12216	0.0211267	0.10836
16668047	STXBP3	syntaxin binding protein 3	ENSG00000116266	0.0381317	1.02678	0.581753	0.777367
16668074	SPATA42	spermatogenesis associated 42 (non-protein coding)	ENSG00000203897	-0.189738	-1.14056	0.0063884	0.0464485
16668079	GPSM2	G-protein signaling modulator 2	ENSG00000121957	-0.35426	-1.27833	2.22431e-06	0.000101653
16668102	TMEM167B	transmembrane protein 167B	ENSG00000215717	0.0326167	1.02287	0.674317	0.837646
16668109	SCARNA2	small Cajal body-specific RNA 2	ENSG00000270066,ENSG00000278249	0.0994783	1.07139	0.263025	0.517855
16668111	KIAA1324	KIAA1324	ENSG00000116299	-0.04141	-1.02912	0.605261	0.79285
16668150	SARS	seryl-tRNA synthetase	ENSG00000031698	0.839088	1.78892	1.14354e-09	2.50544e-07
16668170	CELSR2	cadherin, EGF LAG seven-pass G-type receptor 2	ENSG00000143126	0.0308533	1.02162	0.615959	0.800564
16668220	SYPL2	synaptophysin-like 2	ENSG00000143028	0.00535333	1.00372	0.948416	0.977289
16668229	ATXN7L2	ataxin 7-like 2	ENSG00000162650	-0.0744483	-1.05296	0.219954	0.469923
16668250	CYB561D1	cytochrome b561 family, member D1	ENSG00000174151	0.06036	1.04273	0.577215	0.775125
16668260	GPR61	G protein-coupled receptor 61	ENSG00000156097	-0.101358	-1.07278	0.199268	0.444497
16668272	GNAI3	guanine nucleotide binding protein (G protein), alpha inhibiting activity polypeptide 3	ENSG00000065135	-0.107467	-1.07733	0.0824594	0.263858
16668283	GNAI3	guanine nucleotide binding protein (G protein), alpha inhibiting activity polypeptide 3	ENSG00000065135	0.236047	1.17776	0.0262323	0.124883
16668286	MIR197			-0.0634617	-1.04497	0.66506	0.831576
16668288	AMPD2	adenosine monophosphate deaminase 2	ENSG00000116337	0.0551633	1.03898	0.497186	0.719225
16668333	GSTM4	glutathione S-transferase mu 4	ENSG00000168765	0.13676	1.09943	0.120565	0.3319
16668355	GSTM2	glutathione S-transferase mu 2 (muscle)	ENSG00000213366	0.00116833	1.00081	0.993548	0.997532
16668375	GSTM1			0.137468	1.09997	0.10449	0.303933
16668397	GSTM5	glutathione S-transferase mu 5	ENSG00000134201	-0.218563	-1.16357	0.0354475	0.154307
16668420	CSF1	colony stimulating factor 1 (macrophage)	ENSG00000184371	-0.16822	-1.12367	0.0212554	0.108823
16668439	AHCYL1			0.176502	1.13014	0.00859518	0.0576177
16668464	STRIP1	striatin interacting protein 1	ENSG00000143093	0.167885	1.12341	0.0291726	0.134707
16668513	UBL4B	ubiquitin-like 4B	ENSG00000186150	-0.138883	-1.10105	0.0628954	0.22316
16668517	SLC6A17	solute carrier family 6 (neutral amino acid transporter), member 17	ENSG00000197106	-0.0432167	-1.03041	0.614347	0.799515
16668533	KCNC4	potassium channel, voltage gated Shaw related subfamily C, member 4	ENSG00000116396	0.219298	1.16417	0.0181289	0.0975641
16668550	RBM15	RNA binding motif protein 15	ENSG00000162775	-0.0376083	-1.02641	0.47058	0.700884
16668556	LAMTOR5-AS1	LAMTOR5 antisense RNA 1		0.173108	1.12749	0.130992	0.348841
16668564	PROK1	prokineticin 1	ENSG00000143125	-0.110997	-1.07997	0.101131	0.298032
16668572	CYMP	chymosin pseudogene	ENSG00000240194	-0.0472133	-1.03327	0.55458	0.759309
16668582	CD53	CD53 molecule	ENSG00000143119	-0.0347117	-1.02435	0.624311	0.806039
16668598	LOC100506293			-0.08086	-1.05765	0.389638	0.638436
16668601	RN5S54			-0.0125783	-1.00876	0.840014	0.928592
16668603	CEPT1	choline/ethanolamine phosphotransferase 1	ENSG00000134255	0.190258	1.14097	0.00609042	0.0447697
16668622	CHI3L2	chitinase 3-like 2	ENSG00000064886	-0.0645117	-1.04573	0.302082	0.556231
16668649	CHIAP2	chitinase, acidic pseudogene 2	ENSG00000203878	0.0298933	1.02094	0.658069	0.827712
16668657	CHIA	chitinase, acidic	ENSG00000134216	-0.0157633	-1.01099	0.758065	0.88546
16668677	PIFO	primary cilia formation	ENSG00000173947	-0.0761433	-1.0542	0.304042	0.557751
16668689	ATP5F1	ATP synthase, H+ transporting, mitochondrial Fo complex, subunit B1	ENSG00000116459	-0.0451567	-1.0318	0.484003	0.710085
16668702	C1orf162	chromosome 1 open reading frame 162	ENSG00000143110	0.265393	1.20196	0.00218813	0.0209376
16668712	RAP1A	RAP1A, member of RAS oncogene family	ENSG00000116473	-0.053475	-1.03776	0.447564	0.683585
16668726	FAM212B-AS1	FAM212B antisense RNA 1	ENSG00000227811	0.0176483	1.01231	0.797753	0.906197
16668730	DDX20	DEAD (Asp-Glu-Ala-Asp) box polypeptide 20	ENSG00000064703	-0.0841117	-1.06003	0.278085	0.532868
16668753	KCND3-AS1			-0.135583	-1.09854	0.0536733	0.202187
16668761	LOC643355	uncharacterized LOC643355		0.0163783	1.01142	0.820898	0.918869
16668772	CTTNBP2NL	CTTNBP2 N-terminal like	ENSG00000143079	-0.279175	-1.2135	0.000396739	0.00553188
16668785	WNT2B	wingless-type MMTV integration site family, member 2B	ENSG00000134245	-0.10536	-1.07576	0.243512	0.4965
16668798	CAPZA1	capping protein (actin filament) muscle Z-line, alpha 1	ENSG00000116489	-0.0355533	-1.02495	0.662624	0.830139
16668817	MOV10	Mov10 RISC complex RNA helicase	ENSG00000155363	0.109807	1.07908	0.0863487	0.271406
16668861	FAM19A3	family with sequence similarity 19 (chemokine (C-C motif)-like), member A3	ENSG00000184599	0.117945	1.08519	0.0842012	0.267066
16668874	HP08777	uncharacterized LOC105378912		0.067765	1.04809	0.431058	0.671454
16668878	AKR7A2P1	aldo-keto reductase family 7, member A2 pseudogene 1		-0.231058	-1.1737	0.0342461	0.150573
16668880	SLC16A1-AS1	SLC16A1 antisense RNA 1	ENSG00000226419	0.439373	1.35602	0.000549322	0.0071301
16668891	LRIG2	leucine-rich repeats and immunoglobulin-like domains 2	ENSG00000198799	0.343583	1.2689	7.77115e-05	0.00156246
16668919	MAGI3	membrane associated guanylate kinase, WW and PDZ domain containing 3	ENSG00000081026	-0.139518	-1.10154	0.0748348	0.249018
16668954	AP4B1-AS1	AP4B1 antisense RNA 1	ENSG00000226167	0.0418533	1.02944	0.610314	0.796702
16668960	DCLRE1B	DNA cross-link repair 1B	ENSG00000118655	-0.278585	-1.213	0.000809735	0.00972498
16668969	HIPK1	homeodomain interacting protein kinase 1	ENSG00000163349	0.19195	1.14231	0.0158856	0.0890671
16668997	OLFML3	olfactomedin-like 3	ENSG00000116774	-0.041645	-1.02929	0.649789	0.822441
16669013	SYCP1	synaptonemal complex protein 1	ENSG00000198765	-0.145197	-1.10588	0.0523448	0.199274
16669053	TSHB	thyroid stimulating hormone, beta	ENSG00000134200	0.03875	1.02722	0.700165	0.851231
16669067	VANGL1	VANGL planar cell polarity protein 1	ENSG00000173218	-0.0838367	-1.05983	0.254756	0.508756
16669080	LOC101928995	uncharacterized LOC101928995	ENSG00000228127	-0.0953017	-1.06829	0.061252	0.219393
16669087	SLC22A15	solute carrier family 22, member 15	ENSG00000163393	1.40193	2.64255	8.58245e-14	9.47153e-11
16669105	MAB21L3	mab-21-like 3 (C. elegans)	ENSG00000173212	-0.155877	-1.1141	0.0907993	0.28028
16669121	ATP1A1	ATPase, Na+/K+ transporting, alpha 1 polypeptide	ENSG00000163399	-0.0789533	-1.05625	0.287907	0.5422
16669161	MIR320B1	microRNA 320b-1	ENSG00000211543	-0.335193	-1.26155	0.0101411	0.0647749
16669163	C1orf137	chromosome 1 open reading frame 137		0.00203	1.00141	0.973812	0.989081
16669169	CD2	CD2 molecule	ENSG00000116824	-0.101007	-1.07252	0.386691	0.635654
16669180	PTGFRN	prostaglandin F2 receptor inhibitor	ENSG00000134247	0.201785	1.15012	0.0272978	0.128518
16669196	CD101	CD101 molecule	ENSG00000134256	0.0783967	1.05584	0.279259	0.534156
16669212	TTF2	transcription termination factor, RNA polymerase II	ENSG00000116830	0.08761	1.06261	0.26342	0.518193
16669243	MIR942			0.17312	1.12749	0.0825205	0.263991
16669245	TTF2	transcription termination factor, RNA polymerase II	ENSG00000116830	0.303448	1.23409	0.0393038	0.165345
16669248	LOC100506478			-0.00195	-1.00135	0.981855	0.992413
16669255	MAN1A2	mannosidase, alpha, class 1A, member 2	ENSG00000198162	-0.00807667	-1.00561	0.891251	0.951952
16669278	FAM46C	family with sequence similarity 46, member C	ENSG00000183508	-0.157858	-1.11563	0.0454347	0.181647
16669285	GDAP2			0.00162333	1.00113	0.985461	0.994052
16669288	WDR3	WD repeat domain 3	ENSG00000065183	-0.132422	-1.09613	0.045644	0.181989
16669324	LOC101929147	uncharacterized LOC101929147	ENSG00000231365	0.311048	1.24061	0.00383088	0.0318318
16669347	HAO2	hydroxyacid oxidase 2 (long chain)	ENSG00000116882	-0.114533	-1.08262	0.125704	0.340478
16669361	HAO2-IT1	HAO2 intronic transcript 1	ENSG00000230921	-0.08156	-1.05816	0.292809	0.546395
16669364	HSD3B2			-0.167462	-1.12308	0.0786855	0.256352
16669374	HSD3B1			-0.0591733	-1.04187	0.437523	0.675801
16669384	HSD3BP4	hydroxy-delta-5-steroid dehydrogenase, 3 beta, pseudogene 4		-0.142347	-1.1037	0.0626681	0.222512
16669389	PHGDH	phosphoglycerate dehydrogenase	ENSG00000092621	0.411515	1.33008	1.637e-07	1.29728e-05
16669422	FAM72B			0.30849	1.23841	0.0155145	0.0875041
16669437	HIST2H2BA	histone cluster 2, H2ba (pseudogene)		-0.12745	-1.09236	0.09129	0.28127
16669443	HIST2H2BF	histone cluster 2, H2bf	ENSG00000203814	-0.01192	-1.0083	0.865743	0.94117
16669454	EMBP1	embigin pseudogene 1	ENSG00000231752	0.192145	1.14246	0.18655	0.428245
16669483	MIR3118-1			0.0978233	1.07016	0.279685	0.534512
16669499	MIR3118-1			0.0874083	1.06246	0.304692	0.558509
16669501	LINC00328	long intergenic non-protein coding RNA 328		0.209548	1.15633	0.269337	0.523955
16669549	LOC100132057	phosphodiesterase 4D interacting protein pseudogene		0.40774	1.32661	0.0118904	0.0725426
16669566	RNVU1-3	RNA, variant U1 small nuclear 3	ENSG00000201183	-0.339425	-1.26525	0.000416628	0.00572086
16669568	SRGAP2	SLIT-ROBO Rho GTPase activating protein 2	ENSG00000266028	-0.00489833	-1.0034	0.969343	0.987036
16669573	NBPF9			0.30057	1.23163	0.000115975	0.00213718
16669626	LOC100996740	uncharacterized LOC100996740		0.413287	1.33172	3.4807e-05	0.000831711
16669700	SEC22B			0.154842	1.1133	0.0781585	0.255305
16669708	NOTCH2NL	notch 2 N-terminal like	ENSG00000264343	0.317193	1.2459	0.000454531	0.0061339
16669721	NBPF10			0.24663	1.18643	0.0464675	0.184097
16669781	NOTCH2NL			0.2619	1.19906	0.0542367	0.20331
16669783	NOTCH2NL	notch 2 N-terminal like	ENSG00000264343	0.275622	1.21052	0.0216981	0.110331
16669785	RNVU1-6	RNA, variant U1 small nuclear 6	ENSG00000201558	-0.257672	-1.19555	0.0354346	0.154296
16669787	HFE2	hemochromatosis type 2 (juvenile)	ENSG00000168509	-0.00495667	-1.00344	0.938357	0.972868
16669796	TXNIP	thioredoxin interacting protein	ENSG00000265972	-1.81315	-3.51408	5.70377e-17	3.46788e-13
16669814	ANKRD34A	ankyrin repeat domain 34A	ENSG00000272031	-0.140142	-1.10201	0.0612103	0.219349
16669821	LIX1L	limb and CNS expressed 1 like	ENSG00000271601	0.012395	1.00863	0.865903	0.941181
16669830	RBM8A	RNA binding motif protein 8A	ENSG00000265241	0.00154167	1.00107	0.980356	0.992069
16669840	PEX11B	peroxisomal biogenesis factor 11 beta	ENSG00000131779	-0.0288567	-1.0202	0.692446	0.847796
16669850	ITGA10	integrin, alpha 10	ENSG00000143127	-0.003585	-1.00249	0.958236	0.981457
16669888	ANKRD35	ankyrin repeat domain 35	ENSG00000198483	-0.160122	-1.11738	0.0130004	0.0772735
16669905	PIAS3	protein inhibitor of activated STAT, 3	ENSG00000131788	-0.163203	-1.11977	0.0365776	0.157455
16669930	RNF115	ring finger protein 115	ENSG00000265491	0.156023	1.11421	0.0507762	0.19545
16669944	PDZK1	PDZ domain containing 1	ENSG00000174827	0.208147	1.1552	0.0380629	0.161607
16669960	NBPF25P	neuroblastoma breakpoint family, member 25, pseudogene	ENSG00000272150	-0.134453	-1.09768	0.111337	0.316135
16669963	GPR89C			0.104023	1.07477	0.121132	0.332783
16669992	LOC100505824	uncharacterized LOC100505824	ENSG00000232265	-0.058935	-1.0417	0.479333	0.707344
16669995	RN5S57			-0.125417	-1.09082	0.102526	0.300546
16669997	NBPF12	neuroblastoma breakpoint family, member 12	ENSG00000268043	0.52706	1.44099	0.00405319	0.0330342
16670079	PDIA3P1	protein disulfide isomerase family A, member 3 pseudogene 1		0.576108	1.49082	0.00531263	0.0403519
16670081	CHD1L	chromodomain helicase DNA binding protein 1-like	ENSG00000131778	0.288745	1.22158	5.22561e-05	0.00115083
16670114	BCL9	B-cell CLL/lymphoma 9	ENSG00000116128	-0.386307	-1.30704	5.92308e-05	0.00126245
16670134	LOC102723321	uncharacterized LOC102723321		-0.0761933	-1.05423	0.318627	0.572534
16670138	GJA8	gap junction protein, alpha 8, 50kDa	ENSG00000121634	-0.04229	-1.02975	0.603755	0.791852
16670141	GPR89B			0.12767	1.09253	0.0205292	0.106384
16670172	LOC100505824	uncharacterized LOC100505824	ENSG00000232265	0.174367	1.12847	0.230852	0.482174
16670176	RN5S57			-0.125417	-1.09082	0.102526	0.300546
16670185	LOC284561	uncharacterized LOC284561		1.96427	3.90216	2.03736e-14	2.89081e-11
16670188	LOC101929325	uncharacterized LOC101929325		0.343745	1.26905	8.70395e-06	0.000284065
16670197	RNVU1-3	RNA, variant U1 small nuclear 3	ENSG00000201183	-0.339425	-1.26525	0.000416628	0.00572086
16670199	LOC100132057	phosphodiesterase 4D interacting protein pseudogene		0.346248	1.27125	0.00254371	0.0234152
16670210	RNVU1-19	RNA, variant U1 small nuclear 19	ENSG00000275538	-0.23258	-1.17493	0.0183607	0.0985401
16670212	RNVU1-14	RNA, variant U1 small nuclear 14	ENSG00000207501	-0.82946	-1.77702	0.000316874	0.00463975
16670217	NBPF15	neuroblastoma breakpoint family, member 15	ENSG00000266338	0.218763	1.16374	0.177856	0.417586
16670250	NBPF16			0.35691	1.28068	4.48995e-05	0.00102128
16670270	PPIAL4A			-0.11136	-1.08025	0.218422	0.468008
16670276	LOC645166			-0.161183	-1.1182	0.070163	0.239011
16670309	FAM91A2			0.735495	1.66497	5.64333e-08	5.54965e-06
16670317	FCGR1C	Fc fragment of IgG, high affinity Ic, receptor (CD64), pseudogene	ENSG00000265531	-0.165908	-1.12187	0.241497	0.494189
16670328	PPIAL4C			-0.198525	-1.14752	0.114136	0.321023
16670332	LINC00869	long intergenic non-protein coding RNA 869	ENSG00000277147	0.44632	1.36256	1.1547e-06	6.16603e-05
16670359	RNVU1-4	RNA, variant U1 small nuclear 4	ENSG00000277610	-0.106582	-1.07667	0.208128	0.456435
16670364	LOC644634			0.814308	1.75845	1.07099e-05	0.000332766
16670367	FCGR1A			-0.03399	-1.02384	0.664277	0.831341
16670377	HIST2H4B			-0.313285	-1.24253	2.93633e-05	0.000723688
16670383	HIST2H2AA4			-0.32345	-1.25132	8.8986e-06	0.000288836
16670387	HIST2H3D			-0.40664	-1.32559	7.41556e-07	4.29052e-05
16670391	BOLA1	bolA family member 1	ENSG00000178096	0.0697867	1.04956	0.364976	0.616542
16670401	HIST2H2AC	histone cluster 2, H2ac	ENSG00000184260	-0.0593167	-1.04197	0.272373	0.527417
16670404	VPS45	vacuolar protein sorting 45 homolog (S. cerevisiae)	ENSG00000136631	0.203962	1.15186	0.00820966	0.0558118
16670432	PLEKHO1	pleckstrin homology domain containing, family O member 1	ENSG00000023902	0.00982333	1.00683	0.887364	0.949825
16670454	CA14	carbonic anhydrase XIV	ENSG00000118298	0.0296017	1.02073	0.590674	0.783281
16670469	C1orf54	chromosome 1 open reading frame 54	ENSG00000118292	0.0706667	1.0502	0.403494	0.650555
16670479	CIART	circadian associated repressor of transcription	ENSG00000159208	-0.210723	-1.15727	0.0184912	0.099044
16670492	MRPS21	mitochondrial ribosomal protein S21	ENSG00000266472	-0.0738667	-1.05253	0.167711	0.403951
16670499	PRPF3	pre-mRNA processing factor 3	ENSG00000117360	0.0541567	1.03825	0.538357	0.747438
16670527	RPRD2	regulation of nuclear pre-mRNA domain containing 2	ENSG00000163125	0.0571183	1.04039	0.298857	0.552387
16670547	TARS2			0.162202	1.11899	0.0422315	0.173186
16670574	ECM1	extracellular matrix protein 1	ENSG00000143369	-0.123115	-1.08908	0.0962412	0.289842
16670592	FALEC	focally amplified long non-coding RNA in epithelial cancer	ENSG00000228126	0.048285	1.03403	0.588809	0.781851
16670599	ADAMTSL4	ADAMTS-like 4	ENSG00000143382	-0.06936	-1.04925	0.386104	0.635024
16670632	SETDB1	SET domain, bifurcated 1	ENSG00000143379	0.493715	1.40807	2.34134e-07	1.71378e-05
16670681	ANXA9	annexin A9	ENSG00000143412	0.0680167	1.04827	0.451595	0.686681
16670697	PRUNE	prune exopolyphosphatase	ENSG00000143363	-0.02214	-1.01546	0.775221	0.894384
16670710	BNIPL	BCL2/adenovirus E1B 19kD interacting protein like	ENSG00000163141	0.0356433	1.02501	0.630254	0.810192
16670728	C1orf56	chromosome 1 open reading frame 56	ENSG00000143443	-0.0683067	-1.04849	0.45587	0.689215
16670739	MLLT11	myeloid/lymphoid or mixed-lineage leukemia; translocated to, 11	ENSG00000213190	-0.086915	-1.0621	0.203609	0.450827
16670743	GABPB2	GA binding protein transcription factor, beta subunit 2	ENSG00000143458	0.183318	1.13549	0.0760565	0.250998
16670758	SCNM1			-0.0925783	-1.06627	0.134676	0.354638
16670774	PIP5K1A			0.0128483	1.00895	0.904831	0.958574
16670803	PSMD4			0.173102	1.12748	0.143182	0.368205
16670826	ZNF687	zinc finger protein 687	ENSG00000143373	-0.0905917	-1.06481	0.365702	0.617244
16670847	GBAT2	glioblastoma multiforme-associated transcript 2		-0.104733	-1.0753	0.228169	0.47935
16670850	PSMB4	proteasome subunit beta 4	ENSG00000159377	-0.02641	-1.01847	0.687827	0.845485
16670866	CGN	cingulin	ENSG00000143375	0.015255	1.01063	0.807401	0.911742
16670894	TUFT1	tuftelin 1	ENSG00000143367	0.0802183	1.05718	0.2154	0.465025
16670918	MIR554	microRNA 554	ENSG00000207606	0.03852	1.02706	0.513295	0.729789
16670920	SNX27	sorting nexin family member 27	ENSG00000143376	0.06452	1.04574	0.329115	0.583034
16670940	CELF3			-0.101048	-1.07255	0.278957	0.533922
16670943	RIIAD1	regulatory subunit of type II PKA R-subunit (RIIa) domain containing 1	ENSG00000178796	-0.212928	-1.15904	0.0240102	0.117767
16670959	OAZ3	ornithine decarboxylase antizyme 3	ENSG00000143450	0.115055	1.08302	0.143059	0.368079
16670975	LOC100132111	uncharacterized LOC100132111		-0.0103617	-1.00721	0.915227	0.963572
16670981	NBPF18P	neuroblastoma breakpoint family, member 18, pseudogene		-0.09681	-1.06941	0.219546	0.469518
16670997	FLG-AS1	FLG antisense RNA 1	ENSG00000237975	-0.0655	-1.04645	0.427696	0.669345
16671019	LCE5A	late cornified envelope 5A	ENSG00000186207	-0.146925	-1.10721	0.105644	0.306095
16671023	CRCT1	cysteine-rich C-terminal 1	ENSG00000169509	-0.0814717	-1.0581	0.267787	0.522133
16671027	LCE3C	late cornified envelope 3C	ENSG00000244057	0.09227	1.06605	0.226226	0.477293
16671031	LCE3B	late cornified envelope 3B	ENSG00000187238	0.0276767	1.01937	0.86591	0.941181
16671033	LINC00302	long intergenic non-protein coding RNA 302		-0.0320817	-1.02249	0.681933	0.842471
16671037	LCE2D	late cornified envelope 2D	ENSG00000187223	-0.0535733	-1.03783	0.612757	0.798482
16671041	LCE2C	late cornified envelope 2C	ENSG00000187180	-0.267893	-1.20405	0.00647769	0.0469282
16671045	LCE2B	late cornified envelope 2B	ENSG00000159455	-0.146673	-1.10701	0.268248	0.522622
16671049	LCE2A	late cornified envelope 2A	ENSG00000187173	-0.182872	-1.13514	0.0673853	0.23317
16671053	LCE4A	late cornified envelope 4A	ENSG00000187170	-0.073735	-1.05244	0.374857	0.62528
16671057	C1orf68	chromosome 1 open reading frame 68	ENSG00000198854	0.0683183	1.04849	0.463755	0.695501
16671061	KPRP	keratinocyte proline-rich protein	ENSG00000203786	-0.019575	-1.01366	0.81845	0.917439
16671065	LCE1F	late cornified envelope 1F	ENSG00000240386	-0.06892	-1.04893	0.4271	0.668839
16671068	LCE1E	late cornified envelope 1E	ENSG00000186226	-0.110062	-1.07927	0.157344	0.389434
16671077	LCE1B	late cornified envelope 1B	ENSG00000196734	-0.0528433	-1.03731	0.609064	0.795765
16671082	LCE1A	late cornified envelope 1A	ENSG00000186844	0.0134517	1.00937	0.871505	0.943559
16671086	LCE6A	late cornified envelope 6A	ENSG00000235942	-0.0297483	-1.02083	0.659294	0.828254
16671090	SMCP	sperm mitochondria-associated cysteine-rich protein	ENSG00000163206	-0.13849	-1.10075	0.0878817	0.274459
16671094	IVL	involucrin	ENSG00000163207	0.109382	1.07877	0.216723	0.466269
16671100	SPRR4	small proline-rich protein 4	ENSG00000184148	-0.293888	-1.22594	0.00839249	0.0566626
16671104	SPRR1A	small proline-rich protein 1A	ENSG00000169474	-0.114497	-1.0826	0.184917	0.42623
16671108	SPRR3	small proline-rich protein 3	ENSG00000163209	-0.168607	-1.12397	0.0622984	0.221569
16671115	SPRR1B	small proline-rich protein 1B	ENSG00000169469	-0.05983	-1.04234	0.612776	0.798482
16671121	LOC101928009	uncharacterized LOC101928009	ENSG00000229699	-0.113702	-1.082	0.108724	0.311571
16671125	LELP1	late cornified envelope-like proline-rich 1	ENSG00000203784	0.07393	1.05258	0.291041	0.544801
16671129	PRR9	proline rich 9	ENSG00000203783	-0.05018	-1.03539	0.550947	0.756768
16671133	LOR	loricrin	ENSG00000203782	-0.0278767	-1.01951	0.761832	0.887064
16671139	S100A9	S100 calcium binding protein A9	ENSG00000163220	-0.225108	-1.16887	0.0354416	0.154304
16671144	S100A7A	S100 calcium binding protein A7A	ENSG00000184330	-0.180015	-1.1329	0.0468342	0.184935
16671151	LOC100505623			-0.179267	-1.13231	0.0673054	0.233008
16671154	S100A1	S100 calcium binding protein A1	ENSG00000160678	-0.0487917	-1.0344	0.517613	0.732686
16671166	CHTOP	chromatin target of PRMT1	ENSG00000160679	-0.183893	-1.13595	0.00220013	0.0210052
16671178	SNAPIN	SNAP-associated protein	ENSG00000143553	-0.191117	-1.14165	0.0557261	0.206655
16671187	NPR1	natriuretic peptide receptor 1	ENSG00000169418	-0.051425	-1.03629	0.425457	0.667931
16671217	INTS3	integrator complex subunit 3	ENSG00000143624,ENSG00000262826	0.0684333	1.04858	0.257894	0.512487
16671264	SLC27A3	solute carrier family 27 (fatty acid transporter), member 3	ENSG00000143554,ENSG00000263163	-0.0780667	-1.0556	0.291667	0.545123
16671292	LOC343052			0.035955	1.02524	0.585641	0.780038
16671305	CREB3L4	cAMP responsive element binding protein 3-like 4	ENSG00000143578	0.22115	1.16566	0.0180079	0.0971014
16671325	RPS27	ribosomal protein S27	ENSG00000177954	0.196007	1.14552	0.00773101	0.053535
16671334	UBAP2L	ubiquitin associated protein 2-like	ENSG00000143569	-0.24001	-1.181	5.96802e-05	0.00126839
16671381	HAX1	HCLS1 associated protein X-1	ENSG00000143575	0.57155	1.48612	2.78535e-07	1.95283e-05
16671405	AQP10	aquaporin 10	ENSG00000143595	-0.08921	-1.06379	0.285144	0.53987
16671416	ATP8B2	ATPase, aminophospholipid transporter, class I, type 8B, member 2	ENSG00000143515	-0.06233	-1.04415	0.435882	0.67468
16671455	RNU7-57P			0.241827	1.18249	0.084438	0.267546
16671457	IL6R	interleukin 6 receptor	ENSG00000160712	-0.606805	-1.52288	3.48526e-10	9.19028e-08
16671472	TDRD10	tudor domain containing 10	ENSG00000163239	-0.0335617	-1.02354	0.650889	0.823215
16671491	UBE2Q1-AS1			-0.0517783	-1.03654	0.535912	0.745925
16671494	CHRNB2	cholinergic receptor, nicotinic, beta 2 (neuronal)	ENSG00000160716	-0.0289233	-1.02025	0.714382	0.860545
16671503	CKS1B	CDC28 protein kinase regulatory subunit 1B	ENSG00000173207	-0.121692	-1.08801	0.133884	0.353353
16671514	MIR4258	microRNA 4258	ENSG00000264349	-0.091635	-1.06558	0.391408	0.639829
16671516	FLAD1	flavin adenine dinucleotide synthetase 1	ENSG00000160688	-0.0257117	-1.01798	0.674485	0.837779
16671540	LENEP	lens epithelial protein	ENSG00000163352	-0.0565417	-1.03997	0.462993	0.694862
16671545	ZBTB7B	zinc finger and BTB domain containing 7B	ENSG00000160685	-0.0921733	-1.06597	0.22462	0.475386
16671555	DCST1	DC-STAMP domain containing 1	ENSG00000163357	-0.00560167	-1.00389	0.925736	0.968205
16671579	ADAM15	ADAM metallopeptidase domain 15	ENSG00000143537	0.0648383	1.04597	0.385262	0.634209
16671623	EFNA4	ephrin-A4	ENSG00000243364	-0.455452	-1.37121	4.75877e-05	0.00106855
16671632	EFNA3	ephrin-A3	ENSG00000143590	-0.154752	-1.11323	0.104446	0.303922
16671642	EFNA1	ephrin-A1	ENSG00000169242	-0.0506417	-1.03573	0.534289	0.744944
16671653	SLC50A1	solute carrier family 50 (sugar efflux transporter), member 1	ENSG00000169241	-0.128317	-1.09302	0.0550192	0.205079
16671671	TRIM46	tripartite motif containing 46	ENSG00000163462	0.0412233	1.02899	0.499926	0.721161
16671692	MIR92B	microRNA 92b	ENSG00000271748	0.0576283	1.04075	0.701186	0.85199
16671694	LOC100653116			-0.030645	-1.02147	0.628417	0.808818
16671707	MTX1	metaxin 1	ENSG00000173171	-0.03658	-1.02568	0.568881	0.769099
16671723	HCN3	hyperpolarization activated cyclic nucleotide gated potassium channel 3	ENSG00000143630,ENSG00000263324	-0.030625	-1.02145	0.708825	0.857068
16671738	FDPS	farnesyl diphosphate synthase	ENSG00000160752	-0.327257	-1.25463	3.25133e-05	0.000785089
16671759	RUSC1	RUN and SH3 domain containing 1	ENSG00000160753	-0.18489	-1.13673	0.00383397	0.0318485
16671784	POU5F1P4	POU class 5 homeobox 1 pseudogene 4	ENSG00000237872	0.47991	1.39466	0.000540781	0.00704885
16671786	ASH1L-AS1	ASH1L antisense RNA 1		0.110757	1.07979	0.22378	0.474554
16671791	MSTO1			0.449025	1.36512	0.0041837	0.0338479
16671823	DAP3	death associated protein 3	ENSG00000132676	0.07619	1.05423	0.201057	0.447315
16671856	MSTO2P			0.385827	1.30661	0.0038357	0.031854
16671874	SYT11	synaptotagmin XI	ENSG00000132718	-0.012835	-1.00894	0.858227	0.937766
16671884	RXFP4	relaxin/insulin-like family peptide receptor 4	ENSG00000173080	-0.0377983	-1.02655	0.709689	0.857548
16671889	LAMTOR2	late endosomal/lysosomal adaptor, MAPK and MTOR activator 2	ENSG00000116586	0.0955183	1.06845	0.306181	0.560054
16671901	RAB25	RAB25, member RAS oncogene family	ENSG00000132698	-0.02884	-1.02019	0.77134	0.892523
16671914	LMNA	lamin A/C	ENSG00000160789	-0.359575	-1.28305	1.00946e-05	0.000317287
16671960	SEMA4A	sema domain, immunoglobulin domain (Ig), transmembrane domain (TM) and short cytoplasmic domain, (semaphorin) 4A	ENSG00000196189	0.0636917	1.04514	0.363304	0.615008
16671992	SLC25A44	solute carrier family 25, member 44	ENSG00000160785	-0.291552	-1.22396	0.00139451	0.0148348
16672006	PMF1-BGLAP			-0.090305	-1.0646	0.145197	0.371144
16672027	TMEM79	transmembrane protein 79	ENSG00000163472	0.34174	1.26728	0.000561399	0.00725098
16672043	TSACC	TSSK6 activating co-chaperone	ENSG00000163467	-0.11746	-1.08482	0.0858372	0.270706
16672052	RHBG	Rh family, B glycoprotein (gene/pseudogene)	ENSG00000132677	-0.0350167	-1.02457	0.649002	0.822102
16672082	TTC24	tetratricopeptide repeat domain 24	ENSG00000187862	-0.0592967	-1.04196	0.50217	0.72281
16672097	APOA1BP	apolipoprotein A-I binding protein	ENSG00000163382	-0.15114	-1.11045	0.0357448	0.155238
16672111	HAPLN2	hyaluronan and proteoglycan link protein 2	ENSG00000132702	-0.0350117	-1.02457	0.606754	0.794247
16672126	BCAN	brevican	ENSG00000132692	-0.0231133	-1.01615	0.73042	0.869356
16672151	RRNAD1	ribosomal RNA adenine dimethylase domain containing 1	ENSG00000143303	0.363822	1.28683	0.000954451	0.0110189
16672170	PRCC	papillary renal cell carcinoma (translocation-associated)	ENSG00000143294	-0.0150367	-1.01048	0.827355	0.921872
16672186	NTRK1	neurotrophic tyrosine kinase, receptor, type 1	ENSG00000198400	-0.0216467	-1.01512	0.773874	0.89373
16672214	PEAR1	platelet endothelial aggregation receptor 1	ENSG00000187800	0.185238	1.137	0.00601151	0.0444148
16672243	LRRC71	leucine rich repeat containing 71	ENSG00000160838	-0.0474567	-1.03344	0.516928	0.73253
16672265	CYCSP52	cytochrome c, somatic pseudogene 52	ENSG00000235700	-0.0352417	-1.02473	0.725636	0.867149
16672279	KIRREL	kin of IRRE like (Drosophila)	ENSG00000183853	-0.0588783	-1.04166	0.41626	0.660804
16672298	KIRREL-IT1	KIRREL intronic transcript 1		-0.116248	-1.08391	0.163238	0.397513
16672306	CD1D	CD1d molecule	ENSG00000158473	-0.0522167	-1.03686	0.464623	0.696116
16672315	CD1A	CD1a molecule	ENSG00000158477	0.00424167	1.00294	0.950242	0.978348
16672323	CD1C	CD1c molecule	ENSG00000158481	-0.116845	-1.08436	0.162329	0.396339
16672333	CD1E	CD1e molecule	ENSG00000158488	0.01029	1.00716	0.908627	0.960356
16672349	OR10K1	olfactory receptor, family 10, subfamily K, member 1	ENSG00000173285	-0.0617333	-1.04372	0.326403	0.580415
16672353	OR10R2	olfactory receptor, family 10, subfamily R, member 2	ENSG00000198965	-0.0967183	-1.06934	0.234083	0.486378
16672355	OR10Z1	olfactory receptor, family 10, subfamily Z, member 1	ENSG00000198967	0.0915983	1.06555	0.327879	0.581759
16672358	OR6K6	olfactory receptor, family 6, subfamily K, member 6	ENSG00000180433	-0.0807233	-1.05755	0.324287	0.57861
16672362	MNDA	myeloid cell nuclear differentiation antigen	ENSG00000163563	-0.929593	-1.90474	1.72691e-12	1.12062e-09
16672373	PYHIN1	pyrin and HIN domain family, member 1	ENSG00000163564	-0.0514233	-1.03629	0.570225	0.770009
16672390	IFI16	interferon, gamma-inducible protein 16	ENSG00000163565	0.153022	1.1119	0.0312308	0.141212
16672412	CADM3	cell adhesion molecule 3	ENSG00000162706	-0.162728	-1.1194	0.062592	0.222295
16672426	RN5S60			0.00924	1.00643	0.941912	0.97466
16672428	ACKR1	atypical chemokine receptor 1 (Duffy blood group)	ENSG00000213088	-0.03335	-1.02339	0.747921	0.879174
16672435	FCER1A	Fc fragment of IgE, high affinity I, receptor for; alpha polypeptide	ENSG00000179639	-0.136645	-1.09935	0.0846313	0.267845
16672444	OR10J1	olfactory receptor, family 10, subfamily J, member 1	ENSG00000196184	-0.02903	-1.02033	0.648644	0.821894
16672452	APCS	amyloid P component, serum	ENSG00000132703	-0.0400567	-1.02815	0.612947	0.798564
16672457	DUSP23	dual specificity phosphatase 23	ENSG00000158716	-0.570255	-1.48479	6.8174e-07	4.03853e-05
16672462	FCRL6	Fc receptor-like 6	ENSG00000181036	-0.0882583	-1.06309	0.288914	0.54277
16672478	SLAMF8	SLAM family member 8	ENSG00000158714	-0.0696917	-1.04949	0.502716	0.723153
16672489	LINC01133	long intergenic non-protein coding RNA 1133	ENSG00000224259	0.0164733	1.01148	0.817088	0.916859
16672500	KCNJ9	potassium channel, inwardly rectifying subfamily J, member 9	ENSG00000162728	0.00565667	1.00393	0.937954	0.97269
16672505	ATP1A2	ATPase, Na+/K+ transporting, alpha 2 polypeptide	ENSG00000018625	-0.150667	-1.11008	0.0643387	0.226306
16672538	ATP1A4	ATPase, Na+/K+ transporting, alpha 4 polypeptide	ENSG00000132681	-0.0581867	-1.04116	0.447951	0.683893
16672567	CASQ1	calsequestrin 1 (fast-twitch, skeletal muscle)	ENSG00000143318	-0.148875	-1.1087	0.113475	0.319781
16672583	PEA15	phosphoprotein enriched in astrocytes 15	ENSG00000162734	-0.217783	-1.16295	0.0032849	0.028404
16672593	DCAF8	DDB1 and CUL4 associated factor 8	ENSG00000132716	0.068505	1.04863	0.393014	0.640907
16672596	SUMO1P3	SUMO1 pseudogene 3 (functional)		0.102625	1.07373	0.439299	0.677102
16672598	NCSTN	nicastrin	ENSG00000162736	0.144238	1.10515	0.0272854	0.128497
16672630	NHLH1	nescient helix loop helix 1	ENSG00000171786	0.0840517	1.05999	0.296325	0.549702
16672635	VANGL2	VANGL planar cell polarity protein 2	ENSG00000162738	-0.178833	-1.13197	0.0464627	0.184097
16672654	SLAMF7	SLAM family member 7	ENSG00000026751	0.00515833	1.00358	0.94161	0.974526
16672669	LY9	lymphocyte antigen 9	ENSG00000122224	0.04102	1.02884	0.588963	0.781865
16672699	LOC101928372	uncharacterized LOC101928372	ENSG00000198358	0.003435	1.00238	0.970855	0.987825
16672710	KLHDC9	kelch domain containing 9	ENSG00000162755	-0.0270417	-1.01892	0.666231	0.832251
16672722	NIT1	nitrilase 1	ENSG00000158793	0.221788	1.16618	0.0105888	0.0666346
16672738	UFC1	ubiquitin-fold modifier conjugating enzyme 1	ENSG00000143222	-0.045855	-1.03229	0.506049	0.725646
16672754	USP21	ubiquitin specific peptidase 21	ENSG00000143258	0.103397	1.0743	0.212857	0.461609
16672779	PPOX	protoporphyrinogen oxidase	ENSG00000143224	0.143922	1.1049	0.0755094	0.249995
16672808	NDUFS2	NADH dehydrogenase (ubiquinone) Fe-S protein 2, 49kDa (NADH-coenzyme Q reductase)	ENSG00000158864	0.0791967	1.05643	0.236566	0.488967
16672838	FCER1G	Fc fragment of IgE, high affinity I, receptor for; gamma polypeptide	ENSG00000158869	-0.0104883	-1.0073	0.88135	0.947851
16672847	TOMM40L	translocase of outer mitochondrial membrane 40 homolog (yeast)-like	ENSG00000158882	-0.203247	-1.15129	0.0787223	0.256419
16672864	PCP4L1	Purkinje cell protein 4 like 1	ENSG00000248485	-0.196622	-1.14601	0.0234013	0.115675
16672872	SDHC	succinate dehydrogenase complex, subunit C, integral membrane protein, 15kDa	ENSG00000143252	0.0578117	1.04089	0.429931	0.670961
16672885	SDHC	succinate dehydrogenase complex, subunit C, integral membrane protein, 15kDa	ENSG00000143252	0.463688	1.37906	0.000159389	0.00276444
16672888	LOC100505703			0.197355	1.14659	0.022385	0.112746
16672893	FCGR2A	Fc fragment of IgG, low affinity IIa, receptor (CD32)	ENSG00000143226	-0.205232	-1.15287	0.0583619	0.212749
16672914	HSPA6	heat shock 70kDa protein 6 (HSP70B')	ENSG00000173110	-0.139183	-1.10128	0.12568	0.34046
16672920	FCGR2B	Fc fragment of IgG, low affinity IIb, receptor (CD32)	ENSG00000072694	-0.38578	-1.30657	0.000262733	0.00400853
16672942	HSPA7	heat shock 70kDa protein 7 (HSP70B)		-0.160003	-1.11729	0.0826936	0.264307
16672946	FCRLA	Fc receptor-like A	ENSG00000132185	-0.132468	-1.09617	0.142548	0.367304
16672961	FCRLB	Fc receptor-like B	ENSG00000162746	0.0636733	1.04512	0.335595	0.588675
16672975	DUSP12	dual specificity phosphatase 12	ENSG00000081721	0.151862	1.111	0.0173013	0.0944052
16672988	ATF6	activating transcription factor 6	ENSG00000118217	0.152885	1.11179	0.0596124	0.215451
16673012	NOS1AP	nitric oxide synthase 1 (neuronal) adaptor protein	ENSG00000198929	0.124023	1.08977	0.137	0.358276
16673032	RN5S61			-0.0841717	-1.06008	0.291485	0.545123
16673034	MIR556	microRNA 556		-0.0202267	-1.01412	0.829481	0.923152
16673036	C1orf226			0.0406517	1.02858	0.532257	0.743085
16673043	UHMK1	U2AF homology motif (UHM) kinase 1	ENSG00000152332	-0.0769983	-1.05482	0.194724	0.438796
16673056	UAP1	UDP-N-acetylglucosamine pyrophosphorylase 1	ENSG00000117143	-0.176873	-1.13043	0.00307688	0.0270129
16673075	DDR2	discoidin domain receptor tyrosine kinase 2	ENSG00000162733	-0.122672	-1.08875	0.0761033	0.251024
16673104	HSD17B7			-0.567987	-1.48245	1.487e-06	7.40939e-05
16673126	RGS4	regulator of G-protein signaling 4	ENSG00000117152	-0.0901183	-1.06446	0.285911	0.540702
16673146	LOC101928404	uncharacterized LOC101928404	ENSG00000232892	0.0167317	1.01167	0.796364	0.905351
16673154	NUF2	NUF2, NDC80 kinetochore complex component	ENSG00000143228	-0.0621983	-1.04406	0.44124	0.678276
16673185	RN5S63			0.05783	1.0409	0.483821	0.710085
16673189	RNU5F-6P			-0.0404717	-1.02845	0.668545	0.833635
16673191	PBX1	pre-B-cell leukemia homeobox 1	ENSG00000185630	-0.0592283	-1.04191	0.480977	0.708499
16673229	PBX1	pre-B-cell leukemia homeobox 1	ENSG00000185630	-0.387045	-1.30771	0.00493956	0.0382498
16673241	LRRC52	leucine rich repeat containing 52	ENSG00000162763	-0.0274633	-1.01922	0.674644	0.837779
16673251	MGST3	microsomal glutathione S-transferase 3	ENSG00000143198	-0.14829	-1.10826	0.0835893	0.26596
16673268	MGST3	microsomal glutathione S-transferase 3	ENSG00000143198	0.0241933	1.01691	0.802095	0.908574
16673270	LOC440700	carbonic anhydrase XIV (CA14) pseudogene	ENSG00000215838	-0.0506983	-1.03577	0.664962	0.831576
16673275	LOC100147773	uncharacterized LOC100147773		0.381498	1.30269	0.0014485	0.015289
16673278	UCK2			0.0126083	1.00878	0.87533	0.944723
16673296	RN5S64			0.173338	1.12766	0.140661	0.3643
16673307	FMO9P	flavin containing monooxygenase 9 pseudogene	ENSG00000215834	0.0658933	1.04673	0.309014	0.563368
16673315	POGK	pogo transposable element with KRAB domain	ENSG00000143157	4.83333e-05	1.00003	0.999372	0.999957
16673323	MAEL	maelstrom spermatogenic transposon silencer	ENSG00000143194	-0.202222	-1.15047	0.00548956	0.0413688
16673341	RN5S65			0.326778	1.25421	0.0442289	0.178552
16673348	DUSP27	dual specificity phosphatase 27 (putative)	ENSG00000198842	-0.0263117	-1.01841	0.75025	0.880597
16673359	POU2F1	POU class 2 homeobox 1	ENSG00000143190	0.0212633	1.01485	0.799984	0.907363
16673393	RCSD1	RCSD domain containing 1	ENSG00000198771	0.256653	1.1947	0.00309542	0.0271277
16673410	MPZL1	myelin protein zero-like 1	ENSG00000197965	-0.000376667	-1.00026	0.994166	0.997749
16673428	DCAF6	DDB1 and CUL4 associated factor 6	ENSG00000143164	0.0676433	1.048	0.290369	0.544103
16673466	TIPRL	TOR signaling pathway regulator	ENSG00000143155	0.176652	1.13026	0.0118364	0.072302
16673477	SFT2D2	SFT2 domain containing 2	ENSG00000213064	-0.147228	-1.10744	0.048862	0.190195
16673489	TBX19	T-box 19	ENSG00000143178	0.102902	1.07393	0.18342	0.42456
16673505	MIR557	microRNA 557	ENSG00000207974	-0.0764233	-1.0544	0.494419	0.717436
16673507	XCL1	chemokine (C motif) ligand 1	ENSG00000143184	-0.0788433	-1.05617	0.344063	0.596396
16673513	LINC00626	long intergenic non-protein coding RNA 626	ENSG00000225826	-0.145933	-1.10645	0.065741	0.229299
16673520	RN5S66			-0.117523	-1.08487	0.257891	0.512487
16673522	LOC101928596	probable tumor suppressor protein MN1		-0.303238	-1.23391	0.00209719	0.0202298
16673525	ATP1B1	ATPase, Na+/K+ transporting, beta 1 polypeptide	ENSG00000143153	-0.155865	-1.11409	0.0908472	0.280341
16673544	BLZF1	basic leucine zipper nuclear factor 1	ENSG00000117475	0.136617	1.09932	0.247997	0.501343
16673557	C1orf112	chromosome 1 open reading frame 112	ENSG00000000460	-0.30661	-1.2368	1.23769e-05	0.00037102
16673601	METTL11B	methyltransferase like 11B	ENSG00000203740	0.0177783	1.0124	0.805482	0.910535
16673610	MIR3119-2			-0.0365317	-1.02565	0.664979	0.831576
16673617	GORAB	golgin, RAB6-interacting	ENSG00000120370	0.145813	1.10635	0.0821619	0.263555
16673636	PRRX1	paired related homeobox 1	ENSG00000116132	-0.0985333	-1.07068	0.216628	0.466189
16673652	LOC100127910	uncharacterized LOC100127910		0.00515667	1.00358	0.934473	0.971715
16673654	MROH9	maestro heat-like repeat family member 9	ENSG00000117501	-0.06661	-1.04725	0.343853	0.596136
16673682	FMO3	flavin containing monooxygenase 3	ENSG00000007933	0.03146	1.02205	0.637451	0.814779
16673698	FMO6P	flavin containing monooxygenase 6 pseudogene	ENSG00000117507	0.019915	1.0139	0.787043	0.900838
16673713	FMO2	flavin containing monooxygenase 2 (non-functional)	ENSG00000094963	0.074445	1.05296	0.392523	0.640773
16673731	FMO1	flavin containing monooxygenase 1	ENSG00000010932	-0.109885	-1.07914	0.104395	0.303834
16673748	FMO4	flavin containing monooxygenase 4	ENSG00000076258	-0.0112083	-1.0078	0.865661	0.941134
16673763	TOP1P1	topoisomerase (DNA) I pseudogene 1		-0.00729833	-1.00507	0.922462	0.966716
16673767	PRRC2C	proline-rich coiled-coil 2C	ENSG00000117523	-0.02235	-1.01561	0.715166	0.861141
16673822	METTL13	methyltransferase like 13	ENSG00000010165	-0.346805	-1.27174	1.06636e-05	0.000331674
16673842	DNM3	dynamin 3	ENSG00000197959	-0.0367883	-1.02583	0.643358	0.818481
16673874	DNM3-IT1			0.0219683	1.01534	0.840216	0.928689
16673877	MIR3120	microRNA 3120		-0.174448	-1.12853	0.0607921	0.218375
16673883	C1orf105	chromosome 1 open reading frame 105	ENSG00000180999	-0.0175133	-1.01221	0.828088	0.922516
16673899	SUCO	SUN domain containing ossification factor	ENSG00000094975	0.08416	1.06007	0.193327	0.437051
16673928	FASLG	Fas ligand (TNF superfamily, member 6)	ENSG00000117560	-0.0114883	-1.00799	0.879786	0.946936
16673945	PRDX6	peroxiredoxin 6	ENSG00000117592	-0.001605	-1.00111	0.975037	0.989584
16673955	SLC9C2			-0.109742	-1.07904	0.173735	0.411942
16673958	LOC730159	uncharacterized LOC730159		-0.0953183	-1.0683	0.291015	0.544801
16673961	KLHL20	kelch-like family member 20	ENSG00000076321	0.20239	1.1506	0.00730937	0.0512706
16673983	DARS2	aspartyl-tRNA synthetase 2, mitochondrial	ENSG00000117593	-0.086145	-1.06153	0.344688	0.597062
16674005	GAS5-AS1			-0.10196	-1.07323	0.336085	0.589216
16674008	ZBTB37	zinc finger and BTB domain containing 37	ENSG00000185278	0.228353	1.1715	0.0214926	0.109548
16674020	RN5S67			-0.196632	-1.14602	0.25792	0.512487
16674025	RABGAP1L	RAB GTPase activating protein 1-like	ENSG00000152061	0.341765	1.26731	5.39989e-05	0.00118049
16674080	GPR52	G protein-coupled receptor 52	ENSG00000203737	0.261978	1.19912	0.0742337	0.247809
16674084	RABGAP1L-IT1			0.273718	1.20892	0.00966593	0.062817
16674089	CACYBP	calcyclin binding protein	ENSG00000116161	-0.0864683	-1.06177	0.250862	0.504585
16674106	TNN	tenascin N	ENSG00000120332	-0.056385	-1.03986	0.365342	0.616916
16674130	KIAA0040			0.037965	1.02666	0.50793	0.726543
16674139	LOC101928751	uncharacterized LOC101928751	ENSG00000224718	-0.138105	-1.10046	0.0891281	0.276871
16674151	PAPPA2	pappalysin 2	ENSG00000116183	-0.00764667	-1.00531	0.926267	0.968318
16674185	BRINP2	bone morphogenetic protein/retinoic acid inducible neural-specific 2	ENSG00000198797	-0.130057	-1.09434	0.145631	0.37168
16674201	LOC102724661	uncharacterized LOC102724661		-0.280945	-1.21499	0.00202876	0.0197487
16674206	LOC101928778	uncharacterized LOC101928778	ENSG00000236720	-0.0859283	-1.06137	0.304706	0.558509
16674211	RASAL2	RAS protein activator like 2	ENSG00000075391	0.01606	1.01119	0.854572	0.935855
16674240	TEX35	testis expressed 35	ENSG00000240021	-0.245868	-1.18581	0.0232086	0.115009
16674267	TEX35	testis expressed 35	ENSG00000240021	0.0862417	1.0616	0.255583	0.50978
16674269	TEX35	testis expressed 35	ENSG00000240021	0.04435	1.03122	0.70885	0.857068
16674271	TEX35	testis expressed 35	ENSG00000240021	0.0352183	1.02471	0.71041	0.85809
16674273	C1orf220	chromosome 1 open reading frame 220	ENSG00000213057	0.235152	1.17703	0.00656868	0.0474605
16674283	RN5S69			-0.0341633	-1.02396	0.77351	0.893621
16674287	MIR4424	microRNA 4424	ENSG00000266417	-0.100505	-1.07215	0.363264	0.614975
16674292	RALGPS2	Ral GEF with PH domain and SH3 binding motif 2	ENSG00000116191	0.0369367	1.02593	0.604203	0.792142
16674319	FAM20B	family with sequence similarity 20, member B	ENSG00000116199	0.03559	1.02498	0.582676	0.777832
16674330	TOR3A	torsin family 3, member A	ENSG00000186283	0.0924017	1.06614	0.144891	0.37068
16674355	SOAT1	sterol O-acyltransferase 1	ENSG00000057252	-0.0798467	-1.05691	0.2221	0.472641
16674375	AXDND1	axonemal dynein light chain domain containing 1	ENSG00000162779	-0.108633	-1.07821	0.152408	0.382039
16674412	RNU5F-2P			-0.187113	-1.13848	0.143621	0.368667
16674414	TDRD5	tudor domain containing 5	ENSG00000162782	-0.0210167	-1.01467	0.721155	0.864893
16674436	FAM163A	family with sequence similarity 163, member A	ENSG00000143340	-0.0363517	-1.02552	0.571412	0.770878
16674440	FAM163A	family with sequence similarity 163, member A	ENSG00000143340	-0.129013	-1.09355	0.0477092	0.187175
16674446	TOR1AIP2			-0.18204	-1.13449	0.0330413	0.146923
16674449	TOR1AIP1	torsin A interacting protein 1	ENSG00000143337	0.0230933	1.01614	0.753887	0.882856
16674470	CEP350	centrosomal protein 350kDa	ENSG00000135837	0.085765	1.06125	0.235621	0.488063
16674521	QSOX1			0.136445	1.09919	0.0554156	0.205965
16674540	LHX4	LIM homeobox 4	ENSG00000121454	0.121172	1.08762	0.0830744	0.264875
16674552	OVAAL	ovarian adenocarcinoma amplified long non-coding RNA	ENSG00000236719	-0.00373333	-1.00259	0.964278	0.98444
16674557	XPR1	xenotropic and polytropic retrovirus receptor 1	ENSG00000143324	-0.0761217	-1.05418	0.16137	0.39524
16674589	KIAA1614	KIAA1614	ENSG00000135835	-0.111658	-1.08047	0.209754	0.458483
16674604	MR1	major histocompatibility complex, class I-related	ENSG00000153029	0.497142	1.41141	4.39946e-06	0.000169587
16674618	IER5	immediate early response 5	ENSG00000162783	-0.290432	-1.22301	0.0138484	0.08091
16674625	LOC101928973	uncharacterized LOC101928973	ENSG00000237292	-0.0813933	-1.05804	0.215739	0.465485
16674629	GM140	uncharacterized LOC100287948	ENSG00000179452	-0.07231	-1.0514	0.424165	0.667014
16674633	CACNA1E	calcium channel, voltage-dependent, R type, alpha 1E subunit	ENSG00000198216	-0.106523	-1.07663	0.0754594	0.249911
16674689	RN5S70			-0.156727	-1.11475	0.197035	0.441773
16674700	LINC00272	long intergenic non-protein coding RNA 272	ENSG00000203729	-0.116752	-1.08429	0.265317	0.519801
16674705	RGSL1	regulator of G-protein signaling like 1	ENSG00000121446	-0.00691	-1.0048	0.920925	0.966232
16674737	LOC284648	uncharacterized LOC284648	ENSG00000261504	0.0812983	1.05797	0.384604	0.633571
16674739	LOC105371644	uncharacterized LOC105371644		-0.203205	-1.15125	0.0142324	0.0824896
16674742	NPL	N-acetylneuraminate pyruvate lyase (dihydrodipicolinate synthase)	ENSG00000135838	0.413915	1.3323	6.9087e-05	0.00141678
16674767	DHX9	DEAH (Asp-Glu-Ala-His) box helicase 9	ENSG00000135829	-0.35049	-1.27499	3.91357e-06	0.000154659
16674805	LAMC1	laminin, gamma 1 (formerly LAMB2)	ENSG00000135862	0.196318	1.14577	0.000805898	0.00969844
16674845	LAMC2	laminin, gamma 2	ENSG00000058085	-0.186207	-1.13777	0.0280887	0.131123
16674880	SMG7	SMG7 nonsense mediated mRNA decay factor	ENSG00000116698	-0.0325667	-1.02283	0.605366	0.792953
16674924	LOC100292409			-0.170937	-1.12579	0.115413	0.323455
16674927	RGL1	ral guanine nucleotide dissociation stimulator-like 1	ENSG00000143344	0.00805167	1.0056	0.919728	0.965857
16674953	TSEN15	TSEN15 tRNA splicing endonuclease subunit	ENSG00000198860	0.663523	1.58395	6.17624e-10	1.50048e-07
16674973	C1orf21	chromosome 1 open reading frame 21	ENSG00000116667	0.0868	1.06201	0.292772	0.546369
16674998	RNF2	ring finger protein 2	ENSG00000121481	-0.0498233	-1.03514	0.487444	0.712327
16675009	SWT1	SWT1 RNA endoribonuclease homolog	ENSG00000116668	0.0535733	1.03783	0.578048	0.775594
16675036	LOC102724897	uncharacterized LOC102724897		0.088065	1.06294	0.321543	0.575332
16675045	HMCN1	hemicentin 1	ENSG00000143341	-0.0197667	-1.0138	0.733557	0.870863
16675158	PRG4	proteoglycan 4	ENSG00000116690	-0.0216267	-1.0151	0.744978	0.8775
16675174	C1orf27	chromosome 1 open reading frame 27	ENSG00000157181	0.0764133	1.05439	0.270124	0.524787
16675192	OCLM	oculomedin	ENSG00000262180	0.3158	1.2447	0.0253288	0.121887
16675197	PLA2G4A	phospholipase A2, group IVA (cytosolic, calcium-dependent)	ENSG00000116711	0.120387	1.08703	0.125588	0.340444
16675227	ERVMER61-1	endogenous retrovirus group MER61, member 1	ENSG00000230426	-0.0910833	-1.06517	0.362616	0.614331
16675253	LINC01351	long intergenic non-protein coding RNA 1351		-0.03487	-1.02446	0.709233	0.857317
16675263	LOC440704	uncharacterized LOC440704	ENSG00000231175	-0.0153867	-1.01072	0.840124	0.928634
16675278	RGS18	regulator of G-protein signaling 18	ENSG00000150681	-0.0279383	-1.01955	0.770427	0.891996
16675290	RGS21	regulator of G-protein signaling 21	ENSG00000253148	-0.179272	-1.13231	0.0495174	0.191945
16675301	RGS1	regulator of G-protein signaling 1	ENSG00000090104	-0.0330017	-1.02314	0.67841	0.839895
16675312	RGS13	regulator of G-protein signaling 13	ENSG00000127074	-0.01615	-1.01126	0.813157	0.91464
16675323	RGS2	regulator of G-protein signaling 2	ENSG00000116741	-0.337453	-1.26352	0.00200877	0.0195925
16675334	TROVE2	TROVE domain family, member 2	ENSG00000116747	0.00195167	1.00135	0.976927	0.990478
16675354	CDC73	cell division cycle 73	ENSG00000134371	0.0873267	1.0624	0.153605	0.383883
16675376	MIR1278	microRNA 1278	ENSG00000221680	0.0677433	1.04808	0.361056	0.613187
16675378	LINC01031	long intergenic non-protein coding RNA 1031	ENSG00000232077	-0.086505	-1.06179	0.313673	0.567884
16675398	CFH	complement factor H	ENSG00000000971	-0.20655	-1.15393	0.0109074	0.0681929
16675428	CFHR3	complement factor H-related 3	ENSG00000116785	-0.046175	-1.03252	0.536948	0.746521
16675443	CFHR1			0.035535	1.02494	0.707423	0.856238
16675457	CFHR4	complement factor H-related 4	ENSG00000134365	-0.146643	-1.10699	0.0484813	0.189207
16675472	CFHR2	complement factor H-related 2	ENSG00000080910	-0.272162	-1.20762	0.0974788	0.292035
16675481	CFHR5	complement factor H-related 5	ENSG00000134389	0.0512367	1.03615	0.539597	0.748353
16675495	CRB1	crumbs family member 1, photoreceptor morphogenesis associated	ENSG00000134376	-0.0691183	-1.04908	0.302713	0.556545
16675533	C1orf53	chromosome 1 open reading frame 53	ENSG00000203724	-0.081365	-1.05802	0.365671	0.617226
16675539	LHX9	LIM homeobox 9	ENSG00000143355	0.0912917	1.06532	0.147715	0.374625
16675558	NEK7	NIMA-related kinase 7	ENSG00000151414	0.144002	1.10497	0.0312485	0.14127
16675578	PTPRC	protein tyrosine phosphatase, receptor type, C	ENSG00000081237,ENSG00000262418	0.356515	1.28033	4.12558e-06	0.000161114
16675631	LOC400800	uncharacterized LOC400800	ENSG00000231718	-0.0414783	-1.02917	0.622062	0.80446
16675638	NR5A2	nuclear receptor subfamily 5, group A, member 2	ENSG00000116833	-0.0277167	-1.0194	0.689732	0.846839
16675660	FAM58BP			-0.0713817	-1.05072	0.559726	0.762598
16675668	LOC101929224	uncharacterized LOC101929224	ENSG00000260088	0.164745	1.12097	0.0842122	0.267066
16675673	CAMSAP2	calmodulin regulated spectrin-associated protein family, member 2	ENSG00000118200	-0.179792	-1.13272	0.00721846	0.0507883
16675695	GPR25	G protein-coupled receptor 25	ENSG00000170128	0.0666367	1.04727	0.449624	0.685116
16675698	C1orf106	chromosome 1 open reading frame 106	ENSG00000163362	0.0479433	1.03379	0.430891	0.671431
16675723	LOC101929305	uncharacterized LOC101929305		0.137092	1.09969	0.0939898	0.286098
16675731	IGFN1	immunoglobulin-like and fibronectin type III domain containing 1	ENSG00000163395	-0.0704233	-1.05002	0.366443	0.617991
16675763	PKP1	plakophilin 1	ENSG00000081277	-0.120812	-1.08735	0.0615609	0.220155
16675784	CSRP1			0.272745	1.2081	0.0015525	0.0161466
16675787	RPS10P7	ribosomal protein S10 pseudogene 7		0.112137	1.08083	0.191803	0.434844
16675794	NAV1	neuron navigator 1	ENSG00000134369	-0.138208	-1.10054	0.049611	0.192256
16675842	MIR1231	microRNA 1231	ENSG00000221028	-0.148602	-1.10849	0.325373	0.579653
16675844	IPO9	importin 9	ENSG00000198700	-0.0658267	-1.04668	0.203353	0.450407
16675874	SHISA4	shisa family member 4	ENSG00000198892	0.0702083	1.04987	0.286637	0.541289
16675884	LMOD1	leiomodin 1 (smooth muscle)	ENSG00000163431	-0.0298667	-1.02092	0.718863	0.863346
16675889	TIMM17A	translocase of inner mitochondrial membrane 17 homolog A (yeast)	ENSG00000134375	-0.173107	-1.12748	0.045951	0.182755
16675903	RNPEP	arginyl aminopeptidase (aminopeptidase B)	ENSG00000176393	-0.12335	-1.08926	0.0531841	0.200904
16675922	LOC100506636			0.213397	1.15941	0.0151822	0.0861027
16675924	ELF3	E74-like factor 3 (ets domain transcription factor, epithelial-specific )	ENSG00000163435	0.0221617	1.01548	0.706098	0.855895
16675944	GPR37L1	G protein-coupled receptor 37 like 1	ENSG00000170075	-0.126478	-1.09163	0.13758	0.359025
16675952	PTPRVP	protein tyrosine phosphatase, receptor type, V, pseudogene	ENSG00000243323	-0.0313633	-1.02198	0.62624	0.80733
16675975	LGR6	leucine-rich repeat containing G protein-coupled receptor 6	ENSG00000133067	-0.126603	-1.09172	0.169248	0.406259
16676008	PPP1R12B	protein phosphatase 1, regulatory subunit 12B	ENSG00000077157	0.426443	1.34392	0.00238409	0.0221996
16676055	PCAT6	prostate cancer associated transcript 6 (non-protein coding)	ENSG00000228288	-0.0302517	-1.02119	0.724308	0.866755
16676060	LOC641515			0.00769833	1.00535	0.893809	0.953248
16676067	LOC148709	actin pseudogene	ENSG00000234996	0.0636017	1.04507	0.488962	0.713707
16676071	TMEM183B			0.09148	1.06546	0.427008	0.668839
16676086	PPFIA4	protein tyrosine phosphatase, receptor type, f polypeptide (PTPRF), interacting protein (liprin), alpha 4	ENSG00000143847	0.0213833	1.01493	0.771392	0.892523
16676130	ADORA1			-0.07122	-1.0506	0.491833	0.715887
16676144	LINC01353	long intergenic non-protein coding RNA 1353	ENSG00000231507	-0.0675733	-1.04795	0.349564	0.601835
16676150	BTG2	BTG family, member 2	ENSG00000159388	-0.253333	-1.19196	0.00611516	0.0448912
16676167	PRELP	proline/arginine-rich end leucine-rich repeat protein	ENSG00000188783	-0.128237	-1.09296	0.0653245	0.228466
16676172	OPTC	opticin	ENSG00000188770	-0.0921567	-1.06596	0.104507	0.303944
16676183	ATP2B4	ATPase, Ca++ transporting, plasma membrane 4	ENSG00000058668	0.04459	1.03139	0.47446	0.703638
16676215	SNORA77	small nucleolar RNA, H/ACA box 77	ENSG00000221643	0.0342967	1.02406	0.755277	0.883692
16676217	LAX1	lymphocyte transmembrane adaptor 1	ENSG00000122188	-0.09162	-1.06557	0.249523	0.50332
16676228	ZC3H11A			0.202022	1.15031	0.0016921	0.0171846
16676258	ZBED6	zinc finger, BED-type containing 6	ENSG00000257315	0.267242	1.2035	0.00843231	0.0568199
16676263	ZBED6			0.322158	1.2502	0.000633411	0.00803138
16676265	SNRPE	small nuclear ribonucleoprotein polypeptide E	ENSG00000182004	-0.14196	-1.1034	0.136144	0.356694
16676277	SOX13	SRY (sex determining region Y)-box 13	ENSG00000143842	0.0576783	1.04079	0.477716	0.706322
16676301	LOC101929441	uncharacterized LOC101929441	ENSG00000230550	-0.102715	-1.07379	0.250792	0.504557
16676308	LOC100506838			-0.0840633	-1.06	0.294739	0.548212
16676314	MDM4	MDM4, p53 regulator	ENSG00000198625	0.493253	1.40762	6.41925e-06	0.00022636
16676343	MDM4	MDM4, p53 regulator	ENSG00000198625	-0.04849	-1.03418	0.534437	0.745046
16676347	LOC105371692	uncharacterized LOC105371692		0.0360083	1.02527	0.501758	0.722509
16676355	NFASC	neurofascin	ENSG00000163531	-0.00876667	-1.0061	0.879187	0.946633
16676405	CNTN2	contactin 2 (axonal)	ENSG00000184144	0.0351383	1.02466	0.569004	0.769116
16676437	TMCC2	transmembrane and coiled-coil domain family 2	ENSG00000133069	-0.0351983	-1.0247	0.660812	0.829213
16676453	LEMD1-AS1	LEMD1 antisense RNA 1	ENSG00000226235	-0.0390333	-1.02743	0.546986	0.753708
16676457	LOC284577	uncharacterized LOC284577	ENSG00000224717	-0.0453783	-1.03195	0.547797	0.754408
16676461	CDK18	cyclin-dependent kinase 18	ENSG00000117266	-0.11235	-1.08099	0.141438	0.365737
16676498	MFSD4	major facilitator superfamily domain containing 4	ENSG00000174514	0.040095	1.02818	0.616298	0.80081
16676515	NUCKS1	nuclear casein kinase and cyclin-dependent kinase substrate 1	ENSG00000069275	-0.0879433	-1.06285	0.452833	0.687545
16676523	LOC103021296	uncharacterized LOC103021296		-0.0669117	-1.04747	0.34256	0.594898
16676526	FAM72A			-0.008615	-1.00599	0.917685	0.964765
16676539	FAM72C	family with sequence similarity 72, member C	ENSG00000263513,ENSG00000196550	0.0329217	1.02308	0.629878	0.809817
16676542	AVPR1B	arginine vasopressin receptor 1B	ENSG00000198049	-0.0597233	-1.04227	0.417767	0.661928
16676547	CTSE	cathepsin E	ENSG00000196188	-0.359527	-1.283	0.00102417	0.0116256
16676562	SRGAP2			-0.114228	-1.0824	0.123357	0.336698
16676589	SRGAP2-IT1			-0.02595	-1.01815	0.774249	0.893806
16676592	IKBKE	inhibitor of kappa light polypeptide gene enhancer in B-cells, kinase epsilon	ENSG00000263528	-0.185308	-1.13706	0.0250639	0.121
16676619	RASSF5	Ras association (RalGDS/AF-6) domain family member 5	ENSG00000266094	0.0162267	1.01131	0.782362	0.898102
16676633	DYRK3	dual-specificity tyrosine-(Y)-phosphorylation regulated kinase 3	ENSG00000143479	-0.143775	-1.10479	0.0753216	0.249789
16676643	MAPKAPK2	mitogen-activated protein kinase-activated protein kinase 2	ENSG00000162889	0.0429583	1.03022	0.624137	0.805921
16676661	IL19	interleukin 19	ENSG00000142224	-0.23696	-1.17851	0.0191997	0.101778
16676673	IL20	interleukin 20	ENSG00000162891	0.00722167	1.00502	0.920351	0.966098
16676682	IL24	interleukin 24	ENSG00000162892	0.0812317	1.05792	0.244717	0.497654
16676693	PFKFB2	6-phosphofructo-2-kinase/fructose-2,6-biphosphatase 2	ENSG00000123836	-0.147875	-1.10794	0.0606579	0.217998
16676720	C4BPB	complement component 4 binding protein, beta	ENSG00000123843	-0.180243	-1.13307	0.0209946	0.107877
16676738	C4BPA	complement component 4 binding protein, alpha	ENSG00000123838	-0.220928	-1.16548	0.0302051	0.137838
16676764	CD55	CD55 molecule, decay accelerating factor for complement (Cromer blood group)	ENSG00000196352	0.655637	1.57531	1.33167e-09	2.83427e-07
16676795	CR2	complement component (3d/Epstein Barr virus) receptor 2	ENSG00000117322	-0.0604217	-1.04277	0.318614	0.572534
16676819	CR1	complement component (3b/4b) receptor 1 (Knops blood group)	ENSG00000203710	-0.162173	-1.11897	0.135428	0.355567
16676873	CR1L	complement component (3b/4b) receptor 1-like	ENSG00000197721	0.0701883	1.04985	0.397586	0.645254
16676893	CD46	CD46 molecule, complement regulatory protein	ENSG00000117335	0.07036	1.04998	0.347239	0.599286
16676919	LOC148696	uncharacterized LOC148696		0.0418333	1.02942	0.529034	0.74112
16676947	LOC101929476	uncharacterized LOC101929476		-0.10732	-1.07723	0.114934	0.322532
16676954	MIR205			-0.0388933	-1.02733	0.501403	0.722243
16676965	CAMK1G	calcium/calmodulin-dependent protein kinase IG	ENSG00000008118	-0.0890033	-1.06364	0.296843	0.550269
16676983	G0S2	G0/G1 switch 2	ENSG00000123689	0.0656783	1.04658	0.316002	0.569961
16676988	HSD11B1	hydroxysteroid (11-beta) dehydrogenase 1	ENSG00000117594	-0.38632	-1.30706	4.43537e-05	0.00101225
16676999	TRAF3IP3	TRAF3 interacting protein 3	ENSG00000009790	-0.0657733	-1.04665	0.459708	0.692059
16677037	DIEXF	digestive organ expansion factor homolog (zebrafish)	ENSG00000117597	0.0486867	1.03432	0.45777	0.690536
16677057	SYT14	synaptotagmin XIV	ENSG00000143469	-0.137695	-1.10015	0.102637	0.300598
16677071	SERTAD4	SERTA domain containing 4	ENSG00000082497,ENSG00000281230	-0.221978	-1.16633	0.011444	0.0705778
16677082	HHAT	hedgehog acyltransferase	ENSG00000054392,ENSG00000280680	-0.106745	-1.0768	0.239166	0.491613
16677104	RCOR3	REST corepressor 3	ENSG00000117625	0.232587	1.17494	0.00158469	0.0163639
16677133	TRAF5	TNF receptor-associated factor 5	ENSG00000082512	0.07153	1.05083	0.31477	0.568815
16677153	LINC00467	long intergenic non-protein coding RNA 467		-0.330607	-1.25754	9.30873e-06	0.00029761
16677167	LOC100653135			-0.0402283	-1.02828	0.578253	0.775682
16677172	LOC91548	uncharacterized LOC91548		0.01248	1.00869	0.847023	0.931869
16677201	DTL	denticleless E3 ubiquitin protein ligase homolog (Drosophila)	ENSG00000143476	-0.368233	-1.29077	1.64311e-06	8.03935e-05
16677221	MIR3122	microRNA 3122	ENSG00000264358	-0.208333	-1.15535	0.0678819	0.234296
16677228	PPP2R5A	protein phosphatase 2, regulatory subunit B', alpha	ENSG00000066027	0.116465	1.08408	0.0887854	0.276066
16677254	SNORA16B	small nucleolar RNA, H/ACA box 16B	ENSG00000201544	0.0900483	1.06441	0.48483	0.71046
16677259	NENF	neudesin neurotrophic factor	ENSG00000117691	0.0299233	1.02096	0.756868	0.88496
16677266	LOC101929565	uncharacterized LOC101929565	ENSG00000228067	-0.167	-1.12272	0.0866448	0.27185
16677278	ATF3	activating transcription factor 3	ENSG00000162772	0.383343	1.30436	0.000141161	0.00250847
16677292	FAM71A	family with sequence similarity 71, member A	ENSG00000162771	0.0560567	1.03962	0.463191	0.695125
16677304	TATDN3	TatD DNase domain containing 3	ENSG00000203705	0.73552	1.665	5.11546e-11	1.96481e-08
16677324	FLVCR1	feline leukemia virus subgroup C cellular receptor 1	ENSG00000162769	-0.149233	-1.10898	0.0230523	0.11473
16677339	VASH2	vasohibin 2	ENSG00000143494	-0.04014	-1.02821	0.566423	0.767762
16677361	RPS6KC1	ribosomal protein S6 kinase, 52kDa, polypeptide 1	ENSG00000136643	0.399153	1.31873	0.000158568	0.00275181
16677391	PROX1	prospero homeobox 1	ENSG00000117707	-0.101853	-1.07315	0.0905812	0.279752
16677404	PROX1-IT1			-0.139738	-1.10171	0.129989	0.347316
16677407	SMYD2	SET and MYND domain containing 2	ENSG00000143499	-0.168968	-1.12425	0.00353232	0.0299438
16677425	CENPF	centromere protein F, 350/400kDa	ENSG00000117724	-0.149558	-1.10923	0.0298533	0.136793
16677451	KCNK2	potassium channel, two pore domain subfamily K, member 2	ENSG00000082482	-0.109418	-1.07879	0.139171	0.361898
16677473	KCTD3	potassium channel tetramerization domain containing 3	ENSG00000136636	-0.0779517	-1.05552	0.263973	0.51833
16677500	LOC102723833	uncharacterized LOC102723833	ENSG00000233620	-0.121517	-1.08788	0.0635887	0.22471
16677514	SPATA17	spermatogenesis associated 17	ENSG00000162814	-0.0890183	-1.06365	0.14328	0.368362
16677530	LINC00210	long intergenic non-protein coding RNA 210	ENSG00000231814	0.025065	1.01753	0.793354	0.903806
16677538	LOC101929631	uncharacterized LOC101929631	ENSG00000232100	-0.043935	-1.03092	0.639726	0.816331
16677547	RRP15	ribosomal RNA processing 15 homolog	ENSG00000067533	-0.0516933	-1.03648	0.334154	0.587698
16677556	TGFB2	transforming growth factor, beta 2	ENSG00000092969	-0.318877	-1.24736	0.00038637	0.00542538
16677569	C1orf143			-0.191612	-1.14204	0.0188234	0.10039
16677580	LYPLAL1	lysophospholipase-like 1	ENSG00000143353	0.521918	1.43586	1.56863e-07	1.25985e-05
16677604	LOC101929713	uncharacterized LOC101929713		0.08495	1.06065	0.208009	0.456346
16677612	RN5S76			0.0597417	1.04228	0.430404	0.671278
16677616	IARS2	isoleucyl-tRNA synthetase 2, mitochondrial	ENSG00000067704	-0.170925	-1.12578	0.0135784	0.0798275
16677655	MARK1	MAP/microtubule affinity-regulating kinase 1	ENSG00000116141	-0.0135267	-1.00942	0.837802	0.927236
16677678	C1orf115	chromosome 1 open reading frame 115	ENSG00000162817	-0.185682	-1.13735	0.0225593	0.113131
16677683	MARC2	mitochondrial amidoxime reducing component 2	ENSG00000117791	0.0805083	1.05739	0.279223	0.534121
16677698	MARC1	mitochondrial amidoxime reducing component 1	ENSG00000186205	-0.0384683	-1.02702	0.675839	0.838278
16677718	LINC01352	long intergenic non-protein coding RNA 1352	ENSG00000238078	-0.0702717	-1.04991	0.258877	0.513464
16677723	HLX	H2.0-like homeobox	ENSG00000136630	0.124488	1.09012	0.0474227	0.186464
16677743	TAF1A-AS1	TAF1A antisense RNA 1	ENSG00000225265	-0.004815	-1.00334	0.948264	0.977256
16677748	MIA3	melanoma inhibitory activity family, member 3	ENSG00000154305	0.178408	1.13163	0.00299879	0.02657
16677789	BROX	BRO1 domain and CAAX motif containing	ENSG00000162819	0.0365783	1.02568	0.496932	0.71903
16677808	FAM177B	family with sequence similarity 177, member B	ENSG00000197520	-0.0271583	-1.019	0.723616	0.86638
16677823	DISP1	dispatched homolog 1 (Drosophila)	ENSG00000154309,ENSG00000228106	-0.045965	-1.03237	0.591184	0.783747
16677859	CCDC185	coiled-coil domain containing 185	ENSG00000178395	0.00721333	1.00501	0.939316	0.973456
16677863	CAPN2	calpain 2, (m/II) large subunit	ENSG00000162909	0.114028	1.08225	0.0648829	0.227524
16677904	FBXO28	F-box protein 28	ENSG00000143756	-0.044935	-1.03164	0.600028	0.789675
16677913	DEGS1	delta(4)-desaturase, sphingolipid 1	ENSG00000143753	-0.14959	-1.10925	0.0321347	0.144074
16677925	LOC101927164	uncharacterized LOC101927164	ENSG00000237101	0.005015	1.00348	0.949186	0.977632
16677933	CNIH4	cornichon family AMPA receptor auxiliary protein 4	ENSG00000143771	0.0599383	1.04242	0.384265	0.633329
16677944	CNIH3	cornichon family AMPA receptor auxiliary protein 3	ENSG00000143786	0.290142	1.22276	0.000273184	0.00412444
16677977	DNAH14	dynein, axonemal, heavy chain 14	ENSG00000185842	0.375245	1.29706	0.000206221	0.0033197
16678095	LOC102723834	uncharacterized LOC102723834		0.0266917	1.01867	0.739658	0.874612
16678105	SRP9	signal recognition particle 9kDa	ENSG00000143742	-0.174703	-1.12873	0.0165615	0.0915928
16678114	EPHX1	epoxide hydrolase 1, microsomal (xenobiotic)	ENSG00000143819	-0.101192	-1.07266	0.272917	0.527931
16678128	H3F3B			0.0723467	1.05143	0.579651	0.776138
16678139	LOC105373113	uncharacterized LOC105373113		0.0851517	1.0608	0.335873	0.589018
16678149	MIXL1	Mix paired-like homeobox	ENSG00000185155	-0.0741783	-1.05276	0.335978	0.589133
16678159	C1orf95	chromosome 1 open reading frame 95	ENSG00000203685	0.0289667	1.02028	0.759242	0.886001
16678166	ITPKB-AS1			-0.109498	-1.07885	0.150047	0.378671
16678169	PSEN2	presenilin 2	ENSG00000143801	-0.0320267	-1.02245	0.625675	0.806997
16678191	ADCK3	aarF domain containing kinase 3	ENSG00000163050	-0.05251	-1.03707	0.485593	0.711009
16678245	RN5S77			0.066405	1.0471	0.270423	0.52504
16678247	ZNF678	zinc finger protein 678	ENSG00000181450	0.258417	1.19617	0.0208474	0.107482
16678257	LOC100130093			-0.0713183	-1.05068	0.433577	0.673249
16678262	SNAP47			-0.148513	-1.10843	0.0298613	0.136793
16678281	PRSS38	protease, serine, 38	ENSG00000185888	0.0265417	1.01857	0.734469	0.871481
16678295	WNT3A	wingless-type MMTV integration site family, member 3A	ENSG00000154342	0.005735	1.00398	0.933325	0.971226
16678303	ARF1			-0.112557	-1.08114	0.0793033	0.257548
16678320	MIR3620			-0.0250767	-1.01753	0.816745	0.916684
16678322	GUK1	guanylate kinase 1	ENSG00000143774	-0.18049	-1.13327	0.0148346	0.0847319
16678349	GJC2	gap junction protein, gamma 2, 47kDa	ENSG00000198835	0.00448667	1.00311	0.951059	0.97872
16678353	IBA57	IBA57 homolog, iron-sulfur cluster assembly	ENSG00000181873	-0.302413	-1.23321	0.000674975	0.00840812
16678361	OBSCN	obscurin, cytoskeletal calmodulin and titin-interacting RhoGEF	ENSG00000154358	0.0693417	1.04924	0.232742	0.484797
16678489	OBSCN	obscurin, cytoskeletal calmodulin and titin-interacting RhoGEF	ENSG00000154358	0.203263	1.1513	0.0232455	0.115134
16678496	HIST3H2BB	histone cluster 3, H2bb	ENSG00000196890	-0.328992	-1.25614	0.00266234	0.0242659
16678499	MIR4666A	microRNA 4666a	ENSG00000266174	-0.0851633	-1.06081	0.280064	0.534838
16678501	RNF187	ring finger protein 187	ENSG00000168159	0.315635	1.24456	1.55992e-05	0.000440995
16678516	RN5S19			-0.183287	-1.13547	0.153638	0.383896
16678518	RHOU			0.164473	1.12076	0.029581	0.136001
16678532	TMEM78	transmembrane protein 78	ENSG00000177800	-0.0927967	-1.06644	0.183786	0.425052
16678536	SPHAR			0.003075	1.00213	0.962934	0.983712
16678555	LOC101927478	uncharacterized LOC101927478		0.0362167	1.02542	0.666828	0.832618
16678559	RN5S78			0.0948667	1.06797	0.287524	0.541895
16678561	URB2	URB2 ribosome biogenesis 2 homolog (S. cerevisiae)	ENSG00000135763	-0.0931983	-1.06673	0.149198	0.377225
16678574	LOC101927532	uncharacterized LOC101927532	ENSG00000228058	-0.107517	-1.07737	0.0913597	0.281369
16678579	GALNT2	polypeptide N-acetylgalactosaminyltransferase 2	ENSG00000143641	-0.227558	-1.17085	0.00318733	0.0277861
16678611	COG2	component of oligomeric golgi complex 2	ENSG00000135775	0.008875	1.00617	0.867749	0.942046
16678651	CAPN9	calpain 9	ENSG00000135773	-0.12378	-1.08959	0.115569	0.323646
16678674	RN5S79			-0.0398483	-1.02801	0.660928	0.829213
16678676	LOC101927604	uncharacterized LOC101927604	ENSG00000223393	-0.267245	-1.20351	0.01107	0.068896
16678680	ARV1	ARV1 homolog, fatty acid homeostasis modulator	ENSG00000173409	-0.0639417	-1.04532	0.313355	0.567624
16678691	TRIM67	tripartite motif containing 67	ENSG00000119283	-0.0193283	-1.01349	0.778578	0.896167
16678710	GNPAT	glyceronephosphate O-acyltransferase	ENSG00000116906	0.191017	1.14157	0.00247629	0.0228794
16678738	SPRTN	SprT-like N-terminal domain	ENSG00000010072	-0.050265	-1.03546	0.51151	0.728769
16678752	TSNAX-DISC1			0.431965	1.34907	3.67796e-05	0.000871163
16678801	RNU5A-5P			0.140933	1.10262	0.123771	0.33701
16678803	DISC1-IT1			0.238883	1.18008	0.0424879	0.173658
16678824	MAP10	microtubule-associated protein 10	ENSG00000212916	0.00175167	1.00121	0.980693	0.992175
16678828	LOC101927711	uncharacterized LOC101927711		-0.053205	-1.03757	0.412156	0.657879
16678838	NTPCR	nucleoside-triphosphatase, cancer-related	ENSG00000135778	0.0121767	1.00848	0.872939	0.944111
16678851	KIAA1804	mixed lineage kinase 4	ENSG00000143674	-0.0254083	-1.01777	0.702617	0.852953
16678867	KCNK1	potassium channel, two pore domain subfamily K, member 1	ENSG00000135750	-0.071045	-1.05048	0.236997	0.489587
16678880	MIR4427	microRNA 4427	ENSG00000265744	-0.115228	-1.08315	0.124169	0.337672
16678886	SLC35F3	solute carrier family 35, member F3	ENSG00000183780	-0.000516667	-1.00036	0.994649	0.998028
16678902	MIR4671	microRNA 4671	ENSG00000264377	-0.0012	-1.00083	0.980562	0.992136
16678907	C1orf31			-0.00827667	-1.00575	0.927908	0.968959
16678922	LINC00184	long intergenic non-protein coding RNA 184	ENSG00000224939	-0.0189083	-1.01319	0.829349	0.923152
16678925	LOC101927787	uncharacterized LOC101927787	ENSG00000228044	-0.107692	-1.0775	0.199913	0.445803
16678946	LINC01132	long intergenic non-protein coding RNA 1132	ENSG00000227630	-0.093495	-1.06695	0.159974	0.393361
16678949	RNY4P16			-0.187998	-1.13918	0.129017	0.345742
16678954	GGPS1	geranylgeranyl diphosphate synthase 1	ENSG00000152904	0.164307	1.12063	0.0746041	0.248628
16678966	TBCE	tubulin folding cofactor E	ENSG00000116957	0.0833767	1.05949	0.364802	0.616318
16679003	GPR137B	G protein-coupled receptor 137B	ENSG00000077585	0.0935317	1.06698	0.17756	0.417021
16679020	EDARADD	EDAR-associated death domain	ENSG00000186197	-0.0528783	-1.03733	0.429297	0.670498
16679033	LGALS8	lectin, galactoside-binding, soluble, 8	ENSG00000116977	0.0368	1.02584	0.620445	0.80387
16679064	ACTN2	actinin, alpha 2	ENSG00000077522	0.00820667	1.0057	0.925817	0.96823
16679094	MTR	5-methyltetrahydrofolate-homocysteine methyltransferase	ENSG00000116984	0.100552	1.07218	0.106913	0.308361
16679142	RYR2	ryanodine receptor 2 (cardiac)	ENSG00000198626	-0.0178733	-1.01247	0.830776	0.923818
16679257	LOC100130331	POTE ankyrin domain family, member F pseudogene	ENSG00000237250	-0.06768	-1.04803	0.288034	0.542272
16679276	LOC105373221	uncharacterized LOC105373221		-0.0400617	-1.02816	0.546135	0.753064
16679281	CHRM3	cholinergic receptor, muscarinic 3	ENSG00000133019	0.0299167	1.02095	0.646397	0.820462
16679298	RPS7P5	ribosomal protein S7 pseudogene 5		-0.217138	-1.16243	0.0452401	0.181112
16679301	FMN2	formin 2	ENSG00000155816	-0.0858867	-1.06134	0.263273	0.518051
16679336	RNU5F-8P			-0.00570667	-1.00396	0.936965	0.972312
16679343	MIR3123	microRNA 3123	ENSG00000265831	0.00901667	1.00627	0.918247	0.965076
16679349	KMO	kynurenine 3-monooxygenase (kynurenine 3-hydroxylase)	ENSG00000117009	-0.160977	-1.11804	0.119922	0.330711
16679375	WDR64	WD repeat domain 64	ENSG00000162843	-0.0744	-1.05292	0.239795	0.492432
16679411	EXO1	exonuclease 1	ENSG00000174371	-0.356735	-1.28052	1.50738e-05	0.000432295
16679438	RN5S81			0.107155	1.0771	0.180455	0.420911
16679451	SDCCAG8	serologically defined colon cancer antigen 8	ENSG00000054282,ENSG00000276111	0.340867	1.26652	6.23555e-05	0.00130483
16679480	MIR4677	microRNA 4677	ENSG00000275817,ENSG00000265201	0.276987	1.21166	0.185581	0.426942
16679486	LOC339529	uncharacterized LOC339529	ENSG00000226828	-0.100275	-1.07198	0.238584	0.49105
16679499	ZBTB18	zinc finger and BTB domain containing 18	ENSG00000179456	0.141287	1.10289	0.126846	0.342258
16679509	C1orf100	chromosome 1 open reading frame 100	ENSG00000173728	0.0362017	1.02541	0.705898	0.855791
16679517	C1orf101	chromosome 1 open reading frame 101	ENSG00000179397	-0.121198	-1.08764	0.113402	0.319742
16679546	DESI2	desumoylating isopeptidase 2	ENSG00000121644	0.0598617	1.04237	0.387189	0.636282
16679557	COX20	COX20 cytochrome c oxidase assembly factor	ENSG00000203667	0.0560033	1.03958	0.443619	0.680538
16679569	EFCAB2	EF-hand calcium binding domain 2	ENSG00000203666	0.0735667	1.05232	0.370121	0.621021
16679596	KIF26B	kinesin family member 26B	ENSG00000162849,ENSG00000281216	0.180512	1.13329	0.038168	0.161961
16679622	LOC101928089	uncharacterized LOC101928089		0.23139	1.17397	0.0351713	0.153239
16679627	CNST	consortin, connexin sorting protein	ENSG00000162852	0.304728	1.23519	1.79651e-05	0.000492438
16679643	LOC101928139	uncharacterized LOC101928139	ENSG00000225300	0.211118	1.15759	0.0188626	0.100528
16679646	LOC102724382	uncharacterized LOC102724382		-0.0396617	-1.02787	0.683116	0.843199
16679650	SCCPDH	saccharopine dehydrogenase (putative)	ENSG00000143653	0.0951517	1.06818	0.119479	0.329916
16679665	LINC01341	long intergenic non-protein coding RNA 1341		0.0933283	1.06683	0.233716	0.485934
16679684	VN1R5	vomeronasal 1 receptor 5 (gene/pseudogene)		-0.168582	-1.12395	0.0317989	0.143042
16679697	NLRP3	NLR family, pyrin domain containing 3	ENSG00000162711	0.00541333	1.00376	0.941749	0.974621
16679715	OR2W5	olfactory receptor, family 2, subfamily W, member 5 (gene/pseudogene)		-0.047675	-1.0336	0.554375	0.759174
16679717	GCSAML	germinal center-associated, signaling and motility-like	ENSG00000169224	-0.113303	-1.0817	0.136051	0.356514
16679731	OR2G2	olfactory receptor, family 2, subfamily G, member 2	ENSG00000177489	-0.014045	-1.00978	0.890628	0.951657
16679733	OR2G3	olfactory receptor, family 2, subfamily G, member 3	ENSG00000177476	-0.151298	-1.11057	0.160084	0.393536
16679740	OR14K1			-0.09592	-1.06875	0.175665	0.414598
16679742	TRIM58	tripartite motif containing 58	ENSG00000162722	-0.038155	-1.0268	0.536465	0.746193
16679753	OR2W3			0.0221433	1.01547	0.792328	0.903348
16679755	OR2T8	olfactory receptor, family 2, subfamily T, member 8	ENSG00000177462	-0.134152	-1.09745	0.235076	0.487511
16679757	OR2AJ1			-0.01989	-1.01388	0.858236	0.937766
16679759	OR2L13	olfactory receptor, family 2, subfamily L, member 13	ENSG00000196071	-0.184138	-1.13614	0.0165246	0.0915209
16679764	OR2L8	olfactory receptor, family 2, subfamily L, member 8 (gene/pseudogene)	ENSG00000196936,ENSG00000279263	0.0771383	1.05492	0.574559	0.772976
16679766	OR2AK2	olfactory receptor, family 2, subfamily AK, member 2	ENSG00000187080	-0.218762	-1.16373	0.130722	0.348556
16679769	OR2L1P	olfactory receptor, family 2, subfamily L, member 1 pseudogene	ENSG00000224227	-0.128313	-1.09302	0.161012	0.394644
16679773	OR2L5	olfactory receptor, family 2, subfamily L, member 5	ENSG00000197454	-0.222483	-1.16674	0.0242459	0.118449
16679777	OR2L2	olfactory receptor, family 2, subfamily L, member 2	ENSG00000203663	0.0545283	1.03852	0.626524	0.807532
16679783	OR2L3	olfactory receptor, family 2, subfamily L, member 3	ENSG00000198128	-0.175408	-1.12928	0.213158	0.46206
16679785	OR2M1P	olfactory receptor, family 2, subfamily M, member 1 pseudogene		-0.122012	-1.08825	0.311613	0.565819
16679787	OR2M5	olfactory receptor, family 2, subfamily M, member 5	ENSG00000162727	-0.317065	-1.24579	0.0198515	0.104083
16679789	OR2M2	olfactory receptor, family 2, subfamily M, member 2	ENSG00000198601	-0.20281	-1.15094	0.115978	0.324244
16679791	OR2M3	olfactory receptor, family 2, subfamily M, member 3	ENSG00000228198	-0.0875817	-1.06259	0.335089	0.588266
16679795	OR2M4	olfactory receptor, family 2, subfamily M, member 4	ENSG00000171180	-0.194605	-1.14441	0.0238027	0.117087
16679797	OR14C36	olfactory receptor, family 14, subfamily C, member 36	ENSG00000177174	0.0430183	1.03027	0.633294	0.811938
16679799	OR2T4	olfactory receptor, family 2, subfamily T, member 4	ENSG00000196944,ENSG00000275617,ENSG00000274870	-0.077485	-1.05518	0.40854	0.655202
16679801	OR2T6	olfactory receptor, family 2, subfamily T, member 6	ENSG00000198104,ENSG00000278659,ENSG00000278689	-0.0607583	-1.04301	0.465034	0.696386
16679803	OR2T1	olfactory receptor, family 2, subfamily T, member 1	ENSG00000175143,ENSG00000273508,ENSG00000275244	-0.082545	-1.05888	0.260359	0.514758
16679805	OR2T2	olfactory receptor, family 2, subfamily T, member 2	ENSG00000196240,ENSG00000275754,ENSG00000276821	0.0829033	1.05915	0.312658	0.566863
16679808	OR2T3	olfactory receptor, family 2, subfamily T, member 3	ENSG00000196539,ENSG00000277113,ENSG00000278377	-0.0970967	-1.06962	0.345795	0.598145
16679811	OR2T5	olfactory receptor, family 2, subfamily T, member 5	ENSG00000203661,ENSG00000275102,ENSG00000273827	-0.0117717	-1.00819	0.864418	0.940657
16679816	OR2G6	olfactory receptor, family 2, subfamily G, member 6	ENSG00000188558	-0.0393983	-1.02769	0.606483	0.794033
16679825	LOC101928226	uncharacterized LOC101928226	ENSG00000229703	0.007785	1.00541	0.947843	0.977127
16679830	MIR3124	microRNA 3124	ENSG00000264500	-0.0402183	-1.02827	0.698017	0.850284
16679832	ZNF672	zinc finger protein 672	ENSG00000171161	-0.206772	-1.1541	0.0119118	0.0726139
16679851	PGBD2	piggyBac transposable element derived 2	ENSG00000185220	-0.122005	-1.08825	0.136308	0.356935
16679860	WASH7P			0.199155	1.14803	0.0083184	0.0563146
16679871	FAM138A			-0.0288583	-1.0202	0.746202	0.877934
16679876	LOC728323	uncharacterized LOC728323		0.0713483	1.0507	0.63186	0.811147
16679887	LOC729737	uncharacterized LOC729737		0.47561	1.39051	8.50214e-05	0.00168443
16679892	LOC101929823	uncharacterized LOC101929823		0.38945	1.30989	0.000345722	0.00498378
16679899	LOC100653348			0.3712	1.29343	0.000192437	0.00315231
16679907	LOC100508047			0.346813	1.27175	0.000411074	0.00566024
16679923	LOC101929823	uncharacterized LOC101929823		-0.162835	-1.11948	0.173274	0.411344
16679932	LOC101928626	uncharacterized LOC101928626	ENSG00000223659	0.0859267	1.06137	0.412811	0.658063
16679938	OR4F29			-0.0741817	-1.05276	0.556384	0.76028
16679945	LOC101929823	uncharacterized LOC101929823		0.341905	1.26743	0.00044962	0.00608975
16679952	LOC100288069			0.372102	1.29424	1.50434e-05	0.000431839
16679970	LINC00115	long intergenic non-protein coding RNA 115	ENSG00000225880	0.45238	1.3683	2.54717e-05	0.000646491
16679972	FAM41C	family with sequence similarity 41, member C	ENSG00000230368	0.216972	1.16229	0.0100728	0.0644211
16679986	LOC100130417	uncharacterized LOC100130417	ENSG00000223764	-0.03486	-1.02446	0.59926	0.789222
16679994	NOC2L	NOC2-like nucleolar associated transcriptional repressor	ENSG00000188976	0.00518667	1.0036	0.964649	0.984478
16680017	PERM1	PPARGC1 and ESRR induced regulator, muscle 1	ENSG00000187642	-0.0600117	-1.04247	0.510397	0.728163
16680023	HES4	hes family bHLH transcription factor 4	ENSG00000188290	-0.0489333	-1.0345	0.535066	0.745525
16680034	RNF223	ring finger protein 223	ENSG00000237330	-0.100462	-1.07212	0.210114	0.458843
16680038	C1orf159	chromosome 1 open reading frame 159	ENSG00000131591	-0.02742	-1.01919	0.694634	0.849079
16680072	TTLL10-AS1	TTLL10 antisense RNA 1	ENSG00000205231	-0.00793833	-1.00552	0.921915	0.966549
16680075	TNFRSF18	tumor necrosis factor receptor superfamily, member 18	ENSG00000186891	0.04518	1.03181	0.579846	0.776138
16680085	TNFRSF4	tumor necrosis factor receptor superfamily, member 4	ENSG00000186827	-0.0510767	-1.03604	0.51077	0.728437
16680098	SDF4	stromal cell derived factor 4	ENSG00000078808	-0.115882	-1.08364	0.100316	0.29654
16680113	FAM132A	family with sequence similarity 132, member A	ENSG00000184163	-0.132393	-1.09611	0.243562	0.4965
16680127	UBE2J2	ubiquitin-conjugating enzyme E2, J2	ENSG00000160087	-0.132242	-1.096	0.0294892	0.135642
16680148	ACAP3	ArfGAP with coiled-coil, ankyrin repeat and PH domains 3	ENSG00000131584	0.029895	1.02094	0.656653	0.827012
16680184	CPSF3L			0.089955	1.06434	0.249364	0.503101
16680236	DVL1	dishevelled segment polarity protein 1	ENSG00000107404	-0.04609	-1.03246	0.464343	0.69593
16680258	MXRA8	matrix-remodelling associated 8	ENSG00000162576	-0.096655	-1.06929	0.235004	0.487429
16680274	AURKAIP1	aurora kinase A interacting protein 1	ENSG00000175756	-0.386068	-1.30683	2.46025e-06	0.0001093
16680284	CCNL2	cyclin L2	ENSG00000221978	0.0788717	1.05619	0.391614	0.640092
16680309	MRPL20	mitochondrial ribosomal protein L20	ENSG00000242485	0.0286883	1.02008	0.725783	0.867206
16680323	ANKRD65	ankyrin repeat domain 65	ENSG00000235098	-0.11265	-1.08121	0.293286	0.546817
16680334	LOC102724312	uncharacterized LOC102724312		-0.153207	-1.11204	0.131244	0.349323
16680337	LOC102724312	uncharacterized LOC102724312		-0.112163	-1.08085	0.154172	0.384645
16680342	TMEM240	transmembrane protein 240	ENSG00000205090	-0.0851133	-1.06077	0.248979	0.502699
16680348	SSU72	SSU72 homolog, RNA polymerase II CTD phosphatase	ENSG00000160075	0.0202817	1.01416	0.736858	0.873267
16680362	C1orf233	chromosome 1 open reading frame 233	ENSG00000228594	0.198837	1.14777	0.0173463	0.0945949
16680365	CDK11A			-0.03611	-1.02535	0.648973	0.822102
16680420	SLC35E2B	solute carrier family 35, member E2B	ENSG00000189339	0.470817	1.38589	6.21657e-05	0.00130355
16680435	SLC35E2	solute carrier family 35, member E2	ENSG00000215790	0.00749	1.00521	0.944218	0.975658
16680446	NADK	NAD kinase	ENSG00000008130	-0.0985767	-1.07072	0.127749	0.343301
16680478	GNB1	guanine nucleotide binding protein (G protein), beta polypeptide 1	ENSG00000078369	0.178285	1.13154	0.0532772	0.201102
16680499	TMEM52	transmembrane protein 52	ENSG00000178821	-0.13814	-1.10049	0.104018	0.303211
16680510	CFAP74	cilia and flagella associated protein 74	ENSG00000142609	-0.063865	-1.04526	0.339419	0.592308
16680559	LOC105378589	uncharacterized LOC105378589		-0.0861583	-1.06154	0.293187	0.546737
16680568	LOC100506504	uncharacterized LOC100506504		-0.0681217	-1.04835	0.311279	0.565629
16680575	FAAP20	Fanconi anemia core complex associated protein 20	ENSG00000162585	0.0306717	1.02149	0.609665	0.796317
16680608	MORN1	MORN repeat containing 1	ENSG00000116151	0.347313	1.27219	0.00137498	0.014655
16680634	LOC100129534	small nuclear ribonucleoprotein polypeptide N pseudogene	ENSG00000269896	0.15073	1.11013	0.0914611	0.281569
16680636	PEX10	peroxisomal biogenesis factor 10	ENSG00000157911	0.10402	1.07476	0.17454	0.412858
16680657	PANK4	pantothenate kinase 4	ENSG00000157881,ENSG00000273494	-0.0777217	-1.05535	0.254641	0.508685
16680690	HES5	hes family bHLH transcription factor 5	ENSG00000197921,ENSG00000273529	0.00754167	1.00524	0.918332	0.965076
16680695	LOC115110	uncharacterized LOC115110		0.0802333	1.05719	0.240737	0.493352
16680705	LOC115110	uncharacterized LOC115110		-0.159205	-1.11667	0.0193986	0.102395
16680717	MMEL1	membrane metallo-endopeptidase-like 1	ENSG00000142606,ENSG00000277131	-0.091765	-1.06567	0.237462	0.490106
16680752	TTC34	tetratricopeptide repeat domain 34	ENSG00000215912,ENSG00000275571	0.01257	1.00875	0.904996	0.958591
16680770	LINC00982	long intergenic non-protein coding RNA 982	ENSG00000177133	-0.0611817	-1.04332	0.393055	0.640938
16680790	MEGF6	multiple EGF-like-domains 6	ENSG00000162591	0.0731867	1.05204	0.326236	0.580279
16680836	MIR551A	microRNA 551a	ENSG00000207776	0.182045	1.13449	0.0102227	0.0651704
16680842	WRAP73	WD repeat containing, antisense to TP73	ENSG00000116213	-0.0985117	-1.07067	0.211079	0.459694
16680874	TP73-AS1	TP73 antisense RNA 1	ENSG00000227372	-0.0500117	-1.03527	0.548122	0.754696
16680891	LRRC47	leucine rich repeat containing 47	ENSG00000130764	-0.119472	-1.08634	0.0527122	0.20011
16680901	CEP104	centrosomal protein 104kDa	ENSG00000116198	0.350207	1.27474	3.34665e-05	0.000802899
16680935	C1orf174	chromosome 1 open reading frame 174	ENSG00000198912	-0.0827517	-1.05904	0.285587	0.540392
16680962	MIR4689	microRNA 4689	ENSG00000264101	-0.0461283	-1.03249	0.733533	0.870863
16680964	NPHP4	nephronophthisis 4	ENSG00000131697	0.16027	1.1175	0.0469561	0.185244
16681013	CHD5	chromodomain helicase DNA binding protein 5	ENSG00000116254	-0.0560667	-1.03963	0.39752	0.645218
16681064	RPL22	ribosomal protein L22	ENSG00000116251	-0.0341317	-1.02394	0.590743	0.783313
16681078	LOC102724450	uncharacterized LOC102724450	ENSG00000226944	-0.125478	-1.09087	0.140973	0.364886
16681082	ICMT	isoprenylcysteine carboxyl methyltransferase	ENSG00000116237	-0.231448	-1.17401	0.000217254	0.00346178
16681095	GPR153	G protein-coupled receptor 153	ENSG00000158292	-0.101117	-1.0726	0.225763	0.476927
16681103	ACOT7	acyl-CoA thioesterase 7	ENSG00000097021	-0.24461	-1.18477	0.000125554	0.00229323
16681127	HES2	hes family bHLH transcription factor 2	ENSG00000069812	0.0161617	1.01127	0.828626	0.922938
16681137	MIR4252	microRNA 4252	ENSG00000265392	-0.237767	-1.17917	0.0524641	0.19955
16681142	TNFRSF25	tumor necrosis factor receptor superfamily, member 25	ENSG00000215788	-0.0355417	-1.02494	0.650312	0.822853
16681159	PLEKHG5	pleckstrin homology domain containing, family G (with RhoGef domain) member 5	ENSG00000171680	-0.002785	-1.00193	0.96851	0.986582
16681192	NOL9	nucleolar protein 9	ENSG00000162408	0.0176483	1.01231	0.74134	0.875399
16681210	KLHL21	kelch-like family member 21	ENSG00000162413	-0.169145	-1.12439	0.0207206	0.106985
16681225	DNAJC11	DnaJ (Hsp40) homolog, subfamily C, member 11	ENSG00000007923	-0.140815	-1.10253	0.0403776	0.168402
16681263	LOC100129476	uncharacterized LOC100129476		0.0428667	1.03016	0.710815	0.858315
16681266	LOC100129048			-0.215105	-1.16079	0.0017715	0.0177848
16681271	LOC101928836	uncharacterized LOC101928836		-0.114412	-1.08253	0.185995	0.427366
16681278	UTS2	urotensin 2	ENSG00000049247	0.253165	1.19182	0.0074666	0.0521402
16681288	TNFRSF9	tumor necrosis factor receptor superfamily, member 9	ENSG00000049249	0.0945967	1.06777	0.322603	0.576634
16681304	ERRFI1	ERBB receptor feedback inhibitor 1	ENSG00000116285	-5.66667e-05	-1.00004	0.999427	0.999957
16681323	RERE	arginine-glutamic acid dipeptide (RE) repeats	ENSG00000142599	0.0666967	1.04732	0.287067	0.541464
16681370	ENO1	enolase 1, (alpha)	ENSG00000074800	0.030715	1.02152	0.672028	0.835813
16681390	ENO1-IT1			0.141875	1.10334	0.136238	0.356814
16681395	SLC2A7	solute carrier family 2 (facilitated glucose transporter), member 7	ENSG00000197241	0.03676	1.02581	0.580587	0.776679
16681408	SLC2A5	solute carrier family 2 (facilitated glucose/fructose transporter), member 5	ENSG00000142583	0.0116217	1.00809	0.884235	0.948803
16681437	GPR157	G protein-coupled receptor 157	ENSG00000180758	0.118688	1.08575	0.138158	0.360009
16681449	MIR34A			-0.0699567	-1.04969	0.406515	0.653033
16681451	MIR34A			-0.0789417	-1.05624	0.282077	0.537063
16681457	LOC100506022	uncharacterized LOC100506022		0.0760733	1.05415	0.303875	0.557663
16681460	RN5S40			-0.144257	-1.10516	0.057655	0.21118
16681468	PIK3CD-AS1	PIK3CD antisense RNA 1	ENSG00000179840	0.0882883	1.06311	0.301307	0.555399
16681473	PIK3CD-AS2	PIK3CD antisense RNA 2	ENSG00000231789	0.080625	1.05748	0.288289	0.542437
16681477	CLSTN1	calsyntenin 1	ENSG00000171603	-0.073705	-1.05242	0.239745	0.492396
16681501	CTNNBIP1	catenin, beta interacting protein 1	ENSG00000178585	0.0262283	1.01835	0.748468	0.879525
16681511	LZIC	leucine zipper and CTNNBIP1 domain containing	ENSG00000162441	0.031185	1.02185	0.629072	0.809276
16681528	LOC100287506			0.195205	1.14489	0.0406612	0.168985
16681531	DFFA	DNA fragmentation factor, 45kDa, alpha polypeptide	ENSG00000160049	0.0876217	1.06262	0.289867	0.543651
16681542	CASZ1	castor zinc finger 1	ENSG00000130940	0.223665	1.1677	0.00356924	0.0301796
16681576	C1orf127	chromosome 1 open reading frame 127	ENSG00000175262	0.0515217	1.03636	0.457401	0.690364
16681595	MASP2	mannan-binding lectin serine peptidase 2	ENSG00000009724	-0.147742	-1.10783	0.0309393	0.140255
16681611	SRM	spermidine synthase	ENSG00000116649	-0.227342	-1.17068	0.00126402	0.0136913
16681625	EXOSC10	exosome component 10	ENSG00000171824	-0.0882367	-1.06307	0.158092	0.390766
16681661	MTOR	mechanistic target of rapamycin (serine/threonine kinase)	ENSG00000198793	0.0836667	1.05971	0.166284	0.402009
16681735	FBXO2	F-box protein 2	ENSG00000116661	-0.120075	-1.08679	0.0259185	0.123805
16681749	MAD2L2	MAD2 mitotic arrest deficient-like 2 (yeast)	ENSG00000116670	-0.155	-1.11342	0.0186982	0.0998836
16681771	LOC102724659	uncharacterized LOC102724659	ENSG00000177553	-0.136767	-1.09944	0.10669	0.307965
16681775	MTHFR	methylenetetrahydrofolate reductase (NAD(P)H)	ENSG00000177000	0.0140067	1.00976	0.894166	0.953425
16681799	NPPA	natriuretic peptide A	ENSG00000175206	-0.0905567	-1.06478	0.306409	0.560333
16681806	NPPB	natriuretic peptide B	ENSG00000120937	-0.0172333	-1.01202	0.789903	0.90232
16681812	RNU5E-4P			-0.293342	-1.22548	0.00601082	0.0444148
16681814	KIAA2013	KIAA2013	ENSG00000116685	-0.277082	-1.21174	0.00440042	0.0350774
16681827	DHRS3	dehydrogenase/reductase (SDR family) member 3	ENSG00000162496	-0.011115	-1.00773	0.886429	0.949491
16681845	PRAMEF11	PRAME family member 11	ENSG00000239810,ENSG00000281934	-0.0330117	-1.02315	0.64561	0.819815
16681852	HNRNPCL1			-0.106018	-1.07625	0.206012	0.453866
16681856	PRAMEF4	PRAME family member 4	ENSG00000243073,ENSG00000282584	0.018745	1.01308	0.819024	0.917734
16681862	PRAMEF10	PRAME family member 10	ENSG00000187545,ENSG00000282663	0.155152	1.11354	0.260538	0.515037
16681867	PRAMEF23			-0.0707367	-1.05025	0.469002	0.69958
16681884	HNRNPCL2	heterogeneous nuclear ribonucleoprotein C-like 2	ENSG00000275774,ENSG00000274109	-0.1981	-1.14719	0.206503	0.454259
16681887	PRAMEF26	PRAME family member 26	ENSG00000280267	-0.285355	-1.21871	0.0768618	0.252517
16681891	PRAMEF3			-0.238542	-1.1798	0.0944143	0.287
16681901	PRAMEF8			0.00783167	1.00544	0.909488	0.960695
16681907	PRAMEF13			-0.0473183	-1.03334	0.452786	0.687543
16681914	PRAMEF18			-0.09741	-1.06985	0.283775	0.538645
16681920	PRAMEF8			-0.05205	-1.03674	0.484593	0.710296
16681924	PRAMEF14			-0.0727033	-1.05169	0.466405	0.6977
16681933	PRAMEF19			-0.0935933	-1.06702	0.193526	0.437184
16681940	LRRC38	leucine rich repeat containing 38	ENSG00000162494	0.0811467	1.05786	0.393923	0.641702
16681945	RN5S41			-0.0503733	-1.03553	0.508684	0.726981
16681974	TMEM51-AS1	TMEM51 antisense RNA 1	ENSG00000175147	-0.060475	-1.04281	0.492643	0.716074
16681981	C1orf195	chromosome 1 open reading frame 195		-0.0334217	-1.02344	0.675888	0.838278
16681986	LOC101927417	uncharacterized LOC101927417		-0.0662583	-1.047	0.379249	0.629019
16681992	LOC101927441	uncharacterized LOC101927441		0.013795	1.00961	0.836828	0.926985
16681996	CASP9	caspase 9, apoptosis-related cysteine peptidase	ENSG00000132906	0.0794133	1.05659	0.316976	0.57091
16682016	AGMAT	agmatine ureohydrolase (agmatinase)	ENSG00000116771	-0.0676883	-1.04804	0.373887	0.624515
16682036	SLC25A34			-0.095565	-1.06848	0.306088	0.560007
16682042	UQCRHL	ubiquinol-cytochrome c reductase hinge protein like	ENSG00000233954	-0.175462	-1.12933	0.040888	0.169629
16682044	FLJ37453	uncharacterized LOC729614	ENSG00000179743	-0.0116783	-1.00813	0.883669	0.948625
16682047	ZBTB17	zinc finger and BTB domain containing 17	ENSG00000116809	-0.028	-1.0196	0.706523	0.855914
16682077	HSPB7	heat shock 27kDa protein family, member 7 (cardiovascular)	ENSG00000173641	0.07981	1.05688	0.256188	0.510406
16682090	FAM131C	family with sequence similarity 131, member C	ENSG00000185519	-0.0251417	-1.01758	0.774321	0.893806
16682098	EPHA2	EPH receptor A2	ENSG00000142627	0.0202017	1.0141	0.719693	0.864008
16682120	ARHGEF19	Rho guanine nucleotide exchange factor (GEF) 19	ENSG00000142632	-0.123705	-1.08953	0.0781091	0.255199
16682144	ANO7L1			-0.0671567	-1.04765	0.332498	0.586081
16682148	RSG1	REM2 and RAB-like small GTPase 1	ENSG00000132881	0.0473333	1.03335	0.555133	0.759751
16682161	FBXO42	F-box protein 42	ENSG00000037637	0.313902	1.24306	0.0107447	0.0674164
16682175	SPATA21	spermatogenesis associated 21	ENSG00000187144	-0.195723	-1.1453	0.0490423	0.190598
16682203	CROCCP3	ciliary rootlet coiled-coil, rootletin pseudogene 3	ENSG00000080947	-0.0419817	-1.02953	0.572206	0.771402
16682225	NBPF1			0.666532	1.58725	4.60657e-05	0.00104225
16682259	CROCCP2	ciliary rootlet coiled-coil, rootletin pseudogene 2		0.0788783	1.0562	0.433244	0.673249
16682278	ESPNP	espin pseudogene	ENSG00000268869	-0.0910117	-1.06512	0.409167	0.655805
16682290	MST1L	macrophage stimulating 1-like		-0.141065	-1.10272	0.154675	0.385174
16682322	MIR3675	microRNA 3675	ENSG00000263811	-0.068225	-1.04843	0.275968	0.530784
16682329	LOC100506687			-0.279095	-1.21343	0.112775	0.318625
16682333	MFAP2	microfibrillar-associated protein 2	ENSG00000117122	0.032665	1.0229	0.641457	0.817515
16682348	ATP13A2	ATPase type 13A2	ENSG00000159363	0.000138333	1.0001	0.998283	0.999592
16682384	SDHB	succinate dehydrogenase complex, subunit B, iron sulfur (Ip)	ENSG00000117118	-0.0210217	-1.01468	0.760461	0.886486
16682402	PADI2	peptidyl arginine deiminase, type II	ENSG00000117115	-0.0682833	-1.04847	0.339074	0.592177
16682425	RCC2	regulator of chromosome condensation 2	ENSG00000179051,ENSG00000281540	-0.173372	-1.12769	0.00331112	0.0285727
16682450	TAS1R2	taste receptor, type 1, member 2	ENSG00000179002	-0.166617	-1.12242	0.0171958	0.0939807
16682460	ALDH4A1			-0.12887	-1.09344	0.0457873	0.182396
16682485	MIR1290	microRNA 1290	ENSG00000221662	0.343282	1.26864	0.103931	0.303135
16682487	IFFO2	intermediate filament family orphan 2	ENSG00000169991	-0.222027	-1.16637	0.0169329	0.0930389
16682499	UBR4	ubiquitin protein ligase E3 component n-recognin 4	ENSG00000127481	0.0873883	1.06245	0.133624	0.352791
16682631	EMC1	ER membrane protein complex subunit 1	ENSG00000127463	0.247298	1.18698	0.00296417	0.0263809
16682671	AKR7L	aldo-keto reductase family 7-like (gene/pseudogene)	ENSG00000211454	0.258585	1.1963	0.0393434	0.165464
16682679	AKR7A3	aldo-keto reductase family 7, member A3 (aflatoxin aldehyde reductase)	ENSG00000162482	0.195025	1.14474	0.0507572	0.195402
16682689	LOC100506730	uncharacterized LOC100506730		0.158902	1.11644	0.249798	0.503658
16682691	AKR7A2	aldo-keto reductase family 7, member A2	ENSG00000053371	-0.0663083	-1.04703	0.517788	0.732824
16682704	CAPZB	capping protein (actin filament) muscle Z-line, beta	ENSG00000077549	0.0372933	1.02619	0.577744	0.775487
16682726	LOC100130193	uncharacterized LOC100130193		-0.038555	-1.02708	0.753911	0.882856
16682733	TMCO4	transmembrane and coiled-coil domains 4	ENSG00000162542	0.0436683	1.03073	0.547379	0.754092
16682760	RNF186	ring finger protein 186	ENSG00000178828	0.0174883	1.0122	0.856497	0.936922
16682764	PLA2G2E	phospholipase A2, group IIE	ENSG00000188784	-0.0827167	-1.05901	0.309465	0.56388
16682771	PLA2G2A	phospholipase A2, group IIA (platelets, synovial fluid)	ENSG00000188257	-0.037415	-1.02627	0.615586	0.800324
16682785	PLA2G2D	phospholipase A2, group IID	ENSG00000117215	-0.0537833	-1.03798	0.535213	0.74557
16682792	PLA2G2C	phospholipase A2, group IIC	ENSG00000187980	0.498632	1.41287	2.38822e-06	0.000107395
16682801	UBXN10-AS1	UBXN10 antisense RNA 1	ENSG00000225986	-0.0292	-1.02045	0.700479	0.851439
16682807	LINC01141	long intergenic non-protein coding RNA 1141		-0.0732183	-1.05206	0.330811	0.584544
16682829	CAMK2N1	calcium/calmodulin-dependent protein kinase II inhibitor 1	ENSG00000162545	-0.147365	-1.10754	0.0648576	0.227521
16682835	MUL1	mitochondrial E3 ubiquitin protein ligase 1	ENSG00000090432	-0.209563	-1.15634	0.0214492	0.109424
16682842	DDOST	dolichyl-diphosphooligosaccharide--protein glycosyltransferase subunit (non-catalytic)	ENSG00000244038	-0.0126567	-1.00881	0.794926	0.904692
16682861	KIF17	kinesin family member 17	ENSG00000117245	-0.164488	-1.12077	0.0110155	0.0686814
16682886	SH2D5	SH2 domain containing 5	ENSG00000189410	-0.00319667	-1.00222	0.964744	0.984478
16682904	HP1BP3	heterochromatin protein 1, binding protein 3	ENSG00000127483	0.14891	1.10873	0.0476106	0.186928
16682930	EIF4G3	eukaryotic translation initiation factor 4 gamma, 3	ENSG00000075151	0.22894	1.17197	0.00231455	0.0217835
16682987	MIR1256	microRNA 1256	ENSG00000221808	0.0919917	1.06584	0.493299	0.716527
16682989	ECE1	endothelin converting enzyme 1	ENSG00000117298	-0.154447	-1.11299	0.0517198	0.197848
16683022	RAP1GAP	RAP1 GTPase activating protein	ENSG00000076864	-0.15581	-1.11405	0.0309589	0.140301
16683061	USP48	ubiquitin specific peptidase 48	ENSG00000090686	0.136422	1.09918	0.0335549	0.148586
16683105	HSPG2	heparan sulfate proteoglycan 2	ENSG00000142798	0.204355	1.15217	0.00356071	0.0301331
16683216	LOC101928043	uncharacterized LOC101928043		0.135873	1.09876	0.072837	0.244737
16683221	WNT4	wingless-type MMTV integration site family, member 4	ENSG00000162552	-0.079495	-1.05665	0.313816	0.567934
16683237	MIR4253	microRNA 4253	ENSG00000264014	0.04169	1.02932	0.662645	0.830139
16683239	LACTBL1	lactamase, beta-like 1	ENSG00000215906	0.01322	1.00921	0.869383	0.942741
16683245	C1orf234	chromosome 1 open reading frame 234	ENSG00000227868	-0.0408383	-1.02871	0.572634	0.771792
16683250	LUZP1	leucine zipper protein 1	ENSG00000169641	-0.170652	-1.12557	0.0282286	0.131611
16683264	HTR1D	5-hydroxytryptamine (serotonin) receptor 1D, G protein-coupled	ENSG00000179546	-0.0766983	-1.0546	0.213249	0.462151
16683268	LINC01355	long intergenic non-protein coding RNA 1355		0.682555	1.60498	7.21499e-06	0.000247628
16683271	HNRNPR	heterogeneous nuclear ribonucleoprotein R	ENSG00000125944	0.0299633	1.02099	0.65224	0.824102
16683290	ZNF436	zinc finger protein 436	ENSG00000125945	-0.171763	-1.12643	0.106703	0.307965
16683300	TCEA3	transcription elongation factor A (SII), 3	ENSG00000204219	0.27828	1.21275	0.00123066	0.0134077
16683317	ASAP3	ArfGAP with SH3 domain, ankyrin repeat and PH domain 3	ENSG00000088280	-0.0904283	-1.06469	0.200623	0.446784
16683358	E2F2	E2F transcription factor 2	ENSG00000007968	-0.610655	-1.52695	2.17817e-06	9.99548e-05
16683377	ID3	inhibitor of DNA binding 3, dominant negative helix-loop-helix protein	ENSG00000117318	-0.28853	-1.2214	0.00125351	0.0136068
16683387	TCEB3-AS1	TCEB3 antisense RNA 1	ENSG00000236810	0.245715	1.18568	0.0145891	0.083792
16683397	GALE	UDP-galactose-4-epimerase	ENSG00000117308	-0.00998667	-1.00695	0.901039	0.95716
16683423	HMGCL	3-hydroxymethyl-3-methylglutaryl-CoA lyase	ENSG00000117305	0.0516667	1.03646	0.491089	0.715373
16683445	FUCA1	fucosidase, alpha-L- 1, tissue	ENSG00000179163	0.24769	1.1873	0.0143709	0.0829382
16683460	CNR2	cannabinoid receptor 2 (macrophage)	ENSG00000188822	0.125605	1.09097	0.0607074	0.218123
16683470	SRSF10			0.022355	1.01562	0.788969	0.901899
16683490	LOC100289079			-0.169082	-1.12434	0.0254471	0.122298
16683493	MYOM3	myomesin 3	ENSG00000142661	-0.04763	-1.03357	0.478303	0.706911
16683541	IL22RA1	interleukin 22 receptor, alpha 1	ENSG00000142677	-0.00606667	-1.00421	0.948177	0.977235
16683551	IFNLR1	interferon, lambda receptor 1	ENSG00000185436	-0.03574	-1.02508	0.653623	0.824812
16683574	STPG1	sperm-tail PG-rich repeat containing 1	ENSG00000001460	0.142448	1.10378	0.0428574	0.174743
16683605	NIPAL3			-0.113088	-1.08154	0.135175	0.355271
16683607	RCAN3AS	RCAN3 antisense		0.0562933	1.03979	0.455009	0.688428
16683612	LOC100506985	uncharacterized LOC100506985		0.18103	1.13369	0.0193281	0.10215
16683624	RUNX3	runt-related transcription factor 3	ENSG00000020633	-0.0387783	-1.02724	0.686345	0.844736
16683644	SYF2	SYF2 pre-mRNA-splicing factor	ENSG00000117614	0.186695	1.13815	0.00850119	0.0571548
16683655	C1orf63			0.222013	1.16636	0.00483356	0.0376994
16683678	RHCE			-0.155113	-1.11351	0.158673	0.391551
16683700	LOC100507013			0.0423983	1.02982	0.584543	0.779347
16683703	LOC646471	uncharacterized LOC646471		0.1312	1.0952	0.0591675	0.214374
16683712	AUNIP	aurora kinase A and ninein interacting protein	ENSG00000127423	0.0713617	1.05071	0.48934	0.714081
16683719	PAQR7	progestin and adipoQ receptor family member VII	ENSG00000182749	-0.00597333	-1.00415	0.926136	0.968282
16683723	STMN1	stathmin 1	ENSG00000117632	-0.376958	-1.2986	2.65843e-07	1.89053e-05
16683739	PAFAH2	platelet-activating factor acetylhydrolase 2, 40kDa	ENSG00000158006	0.13127	1.09526	0.0560717	0.207471
16683758	SLC30A2	solute carrier family 30 (zinc transporter), member 2	ENSG00000158014	-0.0602517	-1.04265	0.396145	0.643687
16683771	TRIM63	tripartite motif containing 63, E3 ubiquitin protein ligase	ENSG00000158022	-0.0223	-1.01558	0.81944	0.917833
16683788	UBXN11	UBX domain protein 11	ENSG00000158062	0.0297867	1.02086	0.692379	0.847749
16683817	AIM1L	absent in melanoma 1-like	ENSG00000176092	-0.04646	-1.03273	0.531512	0.742531
16683852	ZNF683	zinc finger protein 683	ENSG00000176083	0.0399883	1.02811	0.607032	0.794436
16683866	LOC101928324	uncharacterized LOC101928324		0.101747	1.07307	0.366497	0.618026
16683875	GPN2	GPN-loop GTPase 2	ENSG00000142751	-0.235463	-1.17728	0.0010153	0.0115337
16683887	GPATCH3	G patch domain containing 3	ENSG00000198746	0.0101883	1.00709	0.907072	0.959586
16683903	NR0B2	nuclear receptor subfamily 0, group B, member 2	ENSG00000131910	-0.16697	-1.1227	0.0343179	0.150688
16683908	KDF1	keratinocyte differentiation factor 1	ENSG00000175707	-0.092505	-1.06622	0.251238	0.50507
16683917	OSTCP2			0.010695	1.00744	0.892758	0.952708
16683920	FAM46B	family with sequence similarity 46, member B	ENSG00000158246	-0.173472	-1.12777	0.0630737	0.223526
16683925	SLC9A1	solute carrier family 9, subfamily A (NHE1, cation proton antiporter 1), member 1	ENSG00000090020	-0.0756517	-1.05384	0.38781	0.636881
16683960	MAP3K6	mitogen-activated protein kinase kinase kinase 6	ENSG00000142733	-0.167635	-1.12322	0.034559	0.151235
16684000	FCN3	ficolin (collagen/fibrinogen domain containing) 3	ENSG00000142748	0.00732833	1.00509	0.94236	0.974779
16684014	CD164L2	CD164 sialomucin-like 2	ENSG00000174950	-0.03458	-1.02426	0.581314	0.777066
16684024	WASF2	WAS protein family, member 2	ENSG00000158195	-0.062735	-1.04444	0.366689	0.618162
16684036	AHDC1	AT hook, DNA binding motif, containing 1	ENSG00000126705	-0.027755	-1.01942	0.686538	0.84476
16684056	FGR	FGR proto-oncogene, Src family tyrosine kinase	ENSG00000000938	-0.218522	-1.16354	0.00284204	0.0255074
16684080	IFI6	interferon, alpha-inducible protein 6	ENSG00000126709	-0.259385	-1.19697	0.0322139	0.144358
16684089	RPA2	replication protein A2, 32kDa	ENSG00000117748	-0.161955	-1.1188	0.0193173	0.102138
16684110	EYA3	EYA transcriptional coactivator and phosphatase 3	ENSG00000158161	-0.140355	-1.10218	0.0686647	0.235932
16684136	EYA3-IT1			0.347502	1.27236	0.0176161	0.095716
16684142	RNU7-29P			0.464312	1.37966	0.00343753	0.0294131
16684144	PTAFR	platelet-activating factor receptor	ENSG00000169403	-0.236522	-1.17815	0.0540654	0.202895
16684152	DNAJC8	DnaJ (Hsp40) homolog, subfamily C, member 8	ENSG00000126698	-0.198005	-1.14711	0.020981	0.10784
16684175	SNHG3			0.0921167	1.06593	0.41168	0.657669
16684178	SNHG12			-0.366177	-1.28893	1.64846e-05	0.00045972
16684192	SNORD99	small nucleolar RNA, C/D box 99	ENSG00000221539	0.160857	1.11795	0.40404	0.651084
16684194	TAF12	TAF12 RNA polymerase II, TATA box binding protein (TBP)-associated factor, 20kDa	ENSG00000120656	-0.01392	-1.0097	0.844444	0.930647
16684214	TMEM200B	transmembrane protein 200B	ENSG00000253304	-0.156228	-1.11437	0.0549372	0.204876
16684222	SRSF4	serine/arginine-rich splicing factor 4	ENSG00000116350	0.00415	1.00288	0.953509	0.979714
16684241	MECR	mitochondrial trans-2-enoyl-CoA reductase	ENSG00000116353	0.458703	1.37431	0.000119654	0.00219675
16684271	LOC101928460	uncharacterized LOC101928460	ENSG00000230523	0.0230933	1.01614	0.772293	0.892838
16684280	LOC101929406	uncharacterized LOC101929406	ENSG00000233399	-0.0461983	-1.03254	0.511366	0.72872
16684297	MATN1	matrilin 1, cartilage matrix protein	ENSG00000162510	0.105013	1.0755	0.124575	0.338567
16684310	LAPTM5	lysosomal protein transmembrane 5	ENSG00000162511	-0.126217	-1.09143	0.0239523	0.117599
16684326	MIR4420	microRNA 4420	ENSG00000264773	-0.106277	-1.07645	0.154165	0.384645
16684331	SDC3	syndecan 3	ENSG00000162512	-0.0476967	-1.03361	0.530301	0.741815
16684344	PUM1	pumilio RNA-binding family member 1	ENSG00000134644	-0.0275133	-1.01925	0.598484	0.788763
16684385	SNORD103A			0.272192	1.20764	0.0490141	0.190513
16684387	SNORD103A			0.272192	1.20764	0.0490141	0.190513
16684389	SNORD85	small nucleolar RNA, C/D box 85		0.209165	1.15602	0.1027	0.300692
16684391	NKAIN1	Na+/K+ transporting ATPase interacting 1	ENSG00000084628	-0.09495	-1.06803	0.185164	0.426542
16684406	SNRNP40	small nuclear ribonucleoprotein 40kDa (U5)	ENSG00000060688	-0.153213	-1.11204	0.017966	0.0969454
16684429	FABP3	fatty acid binding protein 3, muscle and heart	ENSG00000121769	-0.0832217	-1.05938	0.29396	0.547549
16684447	PEF1	penta-EF-hand domain containing 1	ENSG00000162517	0.0503183	1.03549	0.421614	0.66505
16684461	COL16A1	collagen, type XVI, alpha 1	ENSG00000084636	-0.109323	-1.07872	0.100292	0.296526
16684535	ADGRB2	adhesion G protein-coupled receptor B2	ENSG00000121753	0.021125	1.01475	0.76175	0.887064
16684579	MIR4254	microRNA 4254	ENSG00000266580	0.0707133	1.05024	0.479114	0.707161
16684581	SPOCD1	SPOC domain containing 1	ENSG00000134668	-0.0527117	-1.03721	0.491985	0.715887
16684614	PTP4A2	protein tyrosine phosphatase type IVA, member 2	ENSG00000184007	-0.0411917	-1.02896	0.56425	0.765757
16684642	LOC100653331			-0.0182317	-1.01272	0.769881	0.891731
16684649	TMEM234	transmembrane protein 234	ENSG00000160055	0.446868	1.36308	4.75326e-05	0.00106812
16684674	MTMR9LP	myotubularin related protein 9-like, pseudogene		-0.180435	-1.13323	0.0345444	0.151235
16684686	MARCKSL1	MARCKS-like 1	ENSG00000175130	-0.353853	-1.27797	0.000140022	0.00249536
16684694	LOC100128071			0.0917217	1.06564	0.204612	0.451885
16684700	BSDC1	BSD domain containing 1	ENSG00000160058	0.348097	1.27288	0.000221209	0.00351539
16684723	ZBTB8OS	zinc finger and BTB domain containing 8 opposite strand	ENSG00000176261	0.157355	1.11524	0.116182	0.32454
16684744	SYNC	syncoilin, intermediate filament protein	ENSG00000162520	-0.16356	-1.12005	0.0413572	0.170989
16684760	YARS	tyrosyl-tRNA synthetase	ENSG00000134684	0.428517	1.34585	3.75755e-06	0.000150085
16684785	FNDC5	fibronectin type III domain containing 5	ENSG00000160097	-0.131625	-1.09553	0.0862548	0.271369
16684800	TMEM54	transmembrane protein 54	ENSG00000121900	-0.216718	-1.16209	0.0149528	0.0851909
16684812	RNF19B	ring finger protein 19B	ENSG00000116514	0.0187517	1.01308	0.80707	0.911541
16684826	AK2	adenylate kinase 2	ENSG00000004455	0.0711783	1.05057	0.213441	0.462437
16684854	TRIM62	tripartite motif containing 62	ENSG00000116525	-0.098245	-1.07047	0.357443	0.609135
16684870	PHC2	polyhomeotic homolog 2 (Drosophila)	ENSG00000134686	-0.0360017	-1.02527	0.678272	0.839794
16684902	CSMD2	CUB and Sushi multiple domains 2	ENSG00000121904	-0.069515	-1.04936	0.26865	0.523132
16684995	MIR552	microRNA 552	ENSG00000207941	-0.0488067	-1.03441	0.688089	0.845617
16684997	SMIM12	small integral membrane protein 12	ENSG00000163866	-0.0739567	-1.0526	0.245233	0.498282
16685012	DLGAP3	discs, large (Drosophila) homolog-associated protein 3	ENSG00000116544	-0.052045	-1.03673	0.534377	0.744998
16685031	LOC653160	uncharacterized LOC653160	ENSG00000241014	0.243728	1.18405	0.0138083	0.0807549
16685036	ZMYM6NB			0.16812	1.12359	0.0310861	0.140685
16685042	ZMYM6	zinc finger, MYM-type 6	ENSG00000163867	0.21491	1.16063	0.000928388	0.0107975
16685076	SFPQ	splicing factor proline/glutamine-rich	ENSG00000116560	-0.0672483	-1.04772	0.338355	0.591345
16685096	ZMYM4-AS1			0.00230833	1.0016	0.971746	0.988229
16685099	KIAA0319L	KIAA0319-like	ENSG00000142687	0.246103	1.186	0.00325056	0.0281904
16685139	PSMB2	proteasome subunit beta 2	ENSG00000126067	-0.059465	-1.04208	0.410666	0.65688
16685144	PSMB2	proteasome subunit beta 2	ENSG00000126067	-0.122372	-1.08852	0.0255445	0.122663
16685157	C1orf216	chromosome 1 open reading frame 216	ENSG00000142686	-0.019915	-1.0139	0.842239	0.929592
16685165	CLSPN	claspin	ENSG00000092853	-0.537687	-1.45164	4.19497e-08	4.35018e-06
16685201	COL8A2	collagen, type VIII, alpha 2	ENSG00000171812	-0.117405	-1.08478	0.0831721	0.265056
16685208	TRAPPC3	trafficking protein particle complex 3	ENSG00000054116	0.0697617	1.04954	0.334596	0.587867
16685222	EVA1B	eva-1 homolog B (C. elegans)	ENSG00000142694	-0.148305	-1.10827	0.0809482	0.260956
16685227	STK40	serine/threonine kinase 40	ENSG00000196182	0.0687917	1.04884	0.362795	0.614461
16685246	LSM10	LSM10, U7 small nuclear RNA associated	ENSG00000181817	0.07461	1.05308	0.41874	0.662835
16685255	OSCP1	organic solute carrier partner 1	ENSG00000116885	0.18072	1.13345	0.0288107	0.13354
16685281	MRPS15	mitochondrial ribosomal protein S15	ENSG00000116898	-0.0123567	-1.0086	0.824408	0.920797
16685295	CSF3R	colony stimulating factor 3 receptor (granulocyte)	ENSG00000119535	0.488208	1.4027	5.62463e-07	3.46275e-05
16685330	GRIK3	glutamate receptor, ionotropic, kainate 3	ENSG00000163873	-0.172792	-1.12724	0.01856	0.0993233
16685357	RN5S43			0.0291067	1.02038	0.712365	0.859211
16685359	LINC01137	long intergenic non-protein coding RNA 1137	ENSG00000233621	0.005305	1.00368	0.955241	0.980329
16685362	MEAF6	MYST/Esa1-associated factor 6	ENSG00000163875	0.0609867	1.04318	0.326265	0.580284
16685374	SNIP1	Smad nuclear interacting protein 1	ENSG00000163877	-0.159687	-1.11704	0.0320166	0.143761
16685383	GNL2	guanine nucleotide binding protein-like 2 (nucleolar)	ENSG00000134697	-0.0802883	-1.05723	0.242564	0.495658
16685413	RSPO1	R-spondin 1	ENSG00000169218	0.00189167	1.00131	0.981995	0.992444
16685427	C1orf109	chromosome 1 open reading frame 109	ENSG00000116922	0.127517	1.09241	0.0712934	0.241344
16685443	EPHA10	EPH receptor A10	ENSG00000183317	-0.003535	-1.00245	0.962636	0.983564
16685482	YRDC	yrdC N(6)-threonylcarbamoyltransferase domain containing	ENSG00000196449	0.22907	1.17208	0.00205083	0.0199116
16685489	MTF1	metal-regulatory transcription factor 1	ENSG00000188786	-0.209003	-1.15589	0.00268827	0.0244215
16685505	INPP5B	inositol polyphosphate-5-phosphatase B	ENSG00000204084	0.320253	1.24855	1.54135e-05	0.000438276
16685544	SF3A3	splicing factor 3a, subunit 3, 60kDa	ENSG00000183431	-0.165953	-1.12191	0.0135208	0.0796229
16685571	FHL3	four and a half LIM domains 3	ENSG00000183386	-0.07763	-1.05528	0.314371	0.568475
16685580	POU3F1	POU class 3 homeobox 1	ENSG00000185668	-0.204622	-1.15238	0.00671208	0.0481463
16685583	LINC01343	long intergenic non-protein coding RNA 1343	ENSG00000237290	-0.0722767	-1.05137	0.377974	0.627998
16685596	RRAGC	Ras-related GTP binding C	ENSG00000116954	-0.117512	-1.08486	0.189722	0.431615
16685609	GJA9-MYCBP			-0.0199717	-1.01394	0.777806	0.895882
16685626	RHBDL2	rhomboid, veinlet-like 2 (Drosophila)	ENSG00000158315	-0.116075	-1.08378	0.136938	0.358145
16685645	RN5S44			-0.0930283	-1.06661	0.335315	0.58847
16685651	PPIEL			0.279923	1.21413	0.0170626	0.09351
16685669	PABPC4	poly(A) binding protein, cytoplasmic 4 (inducible form)	ENSG00000090621	-0.0186033	-1.01298	0.764014	0.88807
16685702	SNORA55	small nucleolar RNA, H/ACA box 55	ENSG00000201457	0.0209033	1.01459	0.823074	0.92013
16685704	HEYL	hes-related family bHLH transcription factor with YRPW motif-like	ENSG00000163909	0.0168583	1.01175	0.863855	0.940314
16685712	NT5C1A	5'-nucleotidase, cytosolic IA	ENSG00000116981	-0.0438167	-1.03084	0.558685	0.761743
16685719	HPCAL4	hippocalcin like 4	ENSG00000116983	0.0318883	1.02235	0.721056	0.864843
16685729	BMP8B	bone morphogenetic protein 8b	ENSG00000116985	-0.120673	-1.08724	0.292482	0.546054
16685743	OXCT2	3-oxoacid CoA transferase 2	ENSG00000198754	0.0359483	1.02523	0.649504	0.822294
16685748	TRIT1	tRNA isopentenyltransferase 1	ENSG00000043514	0.120728	1.08728	0.123076	0.336388
16685769	MYCL	v-myc avian myelocytomatosis viral oncogene lung carcinoma derived homolog	ENSG00000116990	-0.152625	-1.11159	0.0333285	0.147792
16685779	PPT1	palmitoyl-protein thioesterase 1	ENSG00000131238	-0.0258533	-1.01808	0.66193	0.829742
16685804	COL9A2	collagen, type IX, alpha 2	ENSG00000049089	-0.07326	-1.05209	0.293645	0.547234
16685851	RIMS3	regulating synaptic membrane exocytosis 3	ENSG00000117016	-0.0658	-1.04667	0.41579	0.660515
16685866	NFYC-AS1	NFYC antisense RNA 1		0.46554	1.38083	6.49567e-05	0.00134519
16685868	CITED4	Cbp/p300-interacting transactivator, with Glu/Asp-rich carboxy-terminal domain, 4	ENSG00000179862	-0.012095	-1.00842	0.835171	0.926114
16685875	SLFNL1	schlafen-like 1	ENSG00000171790	0.0503217	1.0355	0.515733	0.731645
16685889	SCMH1	sex comb on midleg homolog 1 (Drosophila)	ENSG00000010803	0.175307	1.1292	0.0159001	0.0891227
16685918	LOC101929901	uncharacterized LOC101929901		-0.14603	-1.10652	0.206955	0.454733
16685921	RN5S45			-0.02227	-1.01556	0.829942	0.923269
16685923	EDN2	endothelin 2	ENSG00000127129	-0.0333183	-1.02336	0.652232	0.824102
16685935	HIVEP3	human immunodeficiency virus type I enhancer binding protein 3	ENSG00000127124	-0.10388	-1.07466	0.126686	0.342131
16685953	GUCA2A	guanylate cyclase activator 2A (guanylin)	ENSG00000197273	-0.127567	-1.09245	0.236074	0.488675
16685958	FOXJ3	forkhead box J3	ENSG00000198815	0.224985	1.16877	0.00670973	0.048141
16685986	ZMYND12	zinc finger, MYND-type containing 12	ENSG00000066185	0.26512	1.20174	0.00185545	0.0184598
16686000	CLDN19	claudin 19	ENSG00000164007	-0.0218933	-1.01529	0.810062	0.912821
16686010	P3H1	prolyl 3-hydroxylase 1	ENSG00000117385	0.132318	1.09605	0.0654921	0.228818
16686040	SVBP	small vasohibin binding protein	ENSG00000177868	0.0582867	1.04123	0.566691	0.767783
16686060	SLC2A1	solute carrier family 2 (facilitated glucose transporter), member 1	ENSG00000117394	0.09299	1.06658	0.132808	0.351478
16686088	EBNA1BP2			-0.218688	-1.16368	0.000842961	0.0100511
16686111	C1orf210	chromosome 1 open reading frame 210	ENSG00000253313	-0.0803367	-1.05726	0.226499	0.477635
16686122	ELOVL1			-0.087585	-1.06259	0.263771	0.51833
16686140	MED8	mediator complex subunit 8	ENSG00000159479	0.225697	1.16934	0.00131348	0.0141273
16686155	MIR6735	microRNA 6735	ENSG00000274975	0.159527	1.11692	0.194334	0.438314
16686158	HYI	hydroxypyruvate isomerase (putative)	ENSG00000178922	0.149077	1.10886	0.0761049	0.251024
16686176	KDM4A-AS1	KDM4A antisense RNA 1		-0.152433	-1.11144	0.0965256	0.29019
16686187	LOC101929592	uncharacterized LOC101929592	ENSG00000229444	0.022215	1.01552	0.799398	0.906967
16686195	LOC101929609	uncharacterized LOC101929609		0.0817517	1.0583	0.297328	0.550689
16686201	SLC6A9	solute carrier family 6 (neurotransmitter transporter, glycine), member 9	ENSG00000196517	1.24473	2.36974	2.40323e-14	3.11344e-11
16686233	ERI3	ERI1 exoribonuclease family member 3	ENSG00000117419	0.00146	1.00101	0.988126	0.995476
16686253	ERI3-IT1	ERI3 intronic transcript 1	ENSG00000233602	0.263452	1.20035	0.00891983	0.0591641
16686260	TMEM53	transmembrane protein 53	ENSG00000126106	-0.312792	-1.24211	0.000360992	0.00513926
16686271	RNU5F-1	RNA, U5F small nuclear 1	ENSG00000199377	0.0410717	1.02888	0.741374	0.875399
16686273	RNU5D-1	RNA, U5D small nuclear 1	ENSG00000200169	-0.297675	-1.22916	0.0176322	0.0957504
16686282	BEST4	bestrophin 4	ENSG00000142959	-0.190602	-1.14124	0.0209101	0.107628
16686293	TCTEX1D4	Tctex1 domain containing 4	ENSG00000188396	-0.212233	-1.15848	0.00435999	0.0348483
16686297	PTCH2	patched 2	ENSG00000117425	-0.06958	-1.04941	0.25644	0.510622
16686324	EIF2B3	eukaryotic translation initiation factor 2B, subunit 3 gamma, 58kDa	ENSG00000070785	0.21519	1.16086	0.00238963	0.0222392
16686345	HECTD3	HECT domain containing E3 ubiquitin protein ligase 3	ENSG00000126107	-0.316803	-1.24557	0.000155738	0.00271217
16686376	ZSWIM5	zinc finger, SWIM-type containing 5	ENSG00000162415	0.1012	1.07267	0.14599	0.372214
16686401	MUTYH	mutY DNA glycosylase	ENSG00000132781	0.150162	1.10969	0.0685994	0.235844
16686438	TESK2	testis-specific kinase 2	ENSG00000070759	0.44209	1.35857	6.45585e-05	0.00134052
16686458	CCDC163P	coiled-coil domain containing 163, pseudogene	ENSG00000280670	0.07997	1.057	0.265377	0.519851
16686472	PRDX1	peroxiredoxin 1	ENSG00000117450	-0.221672	-1.16608	0.000871007	0.0102908
16686484	CCDC17	coiled-coil domain containing 17	ENSG00000159588	0.00907333	1.00631	0.913475	0.962748
16686510	GPBP1L1	GC-rich promoter binding protein 1-like 1	ENSG00000159592	0.207997	1.15508	0.00509412	0.0391412
16686536	RPS15AP10	ribosomal protein S15a pseudogene 10		0.889683	1.85277	7.97533e-06	0.000267915
16686538	IPP	intracisternal A particle-promoted polypeptide	ENSG00000197429	0.145795	1.10634	0.114224	0.321117
16686557	PIK3R3	phosphoinositide-3-kinase, regulatory subunit 3 (gamma)	ENSG00000117461,ENSG00000278139	-0.317675	-1.24632	1.36727e-05	0.000400988
16686574	POMGNT1	protein O-linked mannose N-acetylglucosaminyltransferase 1 (beta 1,2-)	ENSG00000085998	0.299563	1.23077	8.1607e-05	0.00162953
16686611	LRRC41	leucine rich repeat containing 41	ENSG00000132128	0.113612	1.08193	0.0869041	0.272434
16686634	LINC01398	long intergenic non-protein coding RNA 1398	ENSG00000224863	-0.0272517	-1.01907	0.627326	0.808106
16686640	KNCN	kinocilin	ENSG00000162456	-0.0310733	-1.02177	0.584014	0.77885
16686648	MKNK1	MAP kinase interacting serine/threonine kinase 1	ENSG00000079277	-0.0939783	-1.06731	0.293068	0.546653
16686686	MOB3C	MOB kinase activator 3C	ENSG00000142961	0.015645	1.0109	0.842588	0.929627
16686695	ATPAF1	ATP synthase mitochondrial F1 complex assembly factor 1	ENSG00000123472	-0.0988817	-1.07094	0.14986	0.378391
16686716	EFCAB14	EF-hand calcium binding domain 14	ENSG00000159658	-0.10477	-1.07532	0.154649	0.385162
16686734	CYP4Z2P	cytochrome P450, family 4, subfamily Z, polypeptide 2, pseudogene	ENSG00000154198	-0.0195367	-1.01363	0.862525	0.93997
16686745	CYP4A11			0.057285	1.04051	0.445752	0.681901
16686774	PDZK1IP1	PDZK1 interacting protein 1	ENSG00000162366	-0.0591633	-1.04186	0.461417	0.693335
16686784	TAL1	T-cell acute lymphocytic leukemia 1	ENSG00000162367	-0.0412767	-1.02902	0.556153	0.760264
16686796	STIL	SCL/TAL1 interrupting locus	ENSG00000123473	-0.0588033	-1.0416	0.300056	0.553951
16686827	LINC01389	long intergenic non-protein coding RNA 1389		0.119492	1.08635	0.165728	0.401056
16686832	FOXD2-AS1	FOXD2 antisense RNA 1 (head to head)	ENSG00000237424	-0.217407	-1.16264	0.0746191	0.24863
16686839	TRABD2B	TraB domain containing 2B	ENSG00000269113	-0.15561	-1.11389	0.0349166	0.152433
16686852	SKINTL	Skint-like, pseudogene		-0.0737367	-1.05244	0.246012	0.499112
16686863	SPATA6	spermatogenesis associated 6	ENSG00000132122	-0.140655	-1.10241	0.0465965	0.184436
16686865	SPATA6	spermatogenesis associated 6	ENSG00000132122	0.00147833	1.00103	0.985343	0.994017
16686887	AGBL4	ATP/GTP binding protein-like 4	ENSG00000186094	-0.0708633	-1.05035	0.263997	0.51833
16686910	BEND5	BEN domain containing 5	ENSG00000162373	-0.0568017	-1.04016	0.452346	0.687155
16686922	AGBL4-IT1	AGBL4 intronic transcript 1	ENSG00000225623	0.00597	1.00415	0.941986	0.97466
16686945	DMRTA2	DMRT-like family A2	ENSG00000142700	-0.0104717	-1.00728	0.878416	0.946247
16686951	FAF1	Fas (TNFRSF6) associated factor 1	ENSG00000185104	0.28607	1.21931	0.000352172	0.00505475
16686985	LINC01562	long intergenic non-protein coding RNA 1562		-0.101325	-1.07276	0.135828	0.356085
16686990	TTC39A	tetratricopeptide repeat domain 39A	ENSG00000085831	-0.00926167	-1.00644	0.881866	0.947995
16687028	EPS15	epidermal growth factor receptor pathway substrate 15	ENSG00000085832	0.344182	1.26943	7.48095e-06	0.000254754
16687071	NRD1	nardilysin (N-arginine dibasic convertase)	ENSG00000078618	0.11956	1.0864	0.0286643	0.13306
16687123	RAB3B	RAB3B, member RAS oncogene family	ENSG00000169213	-0.00369833	-1.00257	0.970345	0.98758
16687132	TXNDC12	thioredoxin domain containing 12 (endoplasmic reticulum)	ENSG00000117862	0.20452	1.1523	0.00122407	0.0133456
16687146	TXNDC12			-0.0828083	-1.05908	0.224296	0.475007
16687150	CC2D1B	coiled-coil and C2 domain containing 1B	ENSG00000154222	0.0249333	1.01743	0.711886	0.858962
16687188	ORC1	origin recognition complex, subunit 1	ENSG00000085840	-0.139442	-1.10148	0.0392796	0.165266
16687208	ZCCHC11	zinc finger, CCHC domain containing 11	ENSG00000134744	0.47726	1.3921	1.02963e-05	0.000322268
16687264	COA7	cytochrome c oxidase assembly factor 7 (putative)	ENSG00000162377	-0.133347	-1.09684	0.0356506	0.154874
16687273	ECHDC2	enoyl CoA hydratase domain containing 2	ENSG00000121310	-0.161962	-1.11881	0.0132507	0.0784016
16687307	SLC1A7	solute carrier family 1 (glutamate transporter), member 7	ENSG00000162383	0.03837	1.02695	0.599155	0.789154
16687328	C1orf123	chromosome 1 open reading frame 123	ENSG00000162384	0.230503	1.17324	0.00371132	0.0310984
16687342	MAGOH			0.0858717	1.06133	0.390002	0.638554
16687352	LRP8	low density lipoprotein receptor-related protein 8, apolipoprotein e receptor	ENSG00000157193	-0.0596583	-1.04222	0.331615	0.585063
16687400	SLC25A3P1	solute carrier family 25 (mitochondrial carrier; phosphate carrier), member 3 pseudogene 1	ENSG00000236253	-0.139137	-1.10125	0.0541406	0.203079
16687403	GLIS1	GLIS family zinc finger 1	ENSG00000174332	0.03725	1.02616	0.562019	0.764086
16687418	NDC1	NDC1 transmembrane nucleoporin	ENSG00000058804	-0.162675	-1.11936	0.00914671	0.0602308
16687445	YIPF1	Yip1 domain family, member 1	ENSG00000058799	-0.187495	-1.13878	0.00892605	0.0591701
16687467	HSPB11	heat shock protein family B (small), member 11	ENSG00000081870	-0.1221	-1.08832	0.123779	0.33701
16687479	LDLRAD1	low density lipoprotein receptor class A domain containing 1	ENSG00000203985	0.00549833	1.00382	0.941225	0.974385
16687487	TMEM59	transmembrane protein 59	ENSG00000116209	0.127015	1.09203	0.045589	0.181947
16687505	CDCP2	CUB domain containing protein 2	ENSG00000157211	0.0807967	1.0576	0.32853	0.582448
16687524	CYB5RL	cytochrome b5 reductase-like	ENSG00000215883	0.154802	1.11327	0.0596363	0.215474
16687546	SSBP3	single stranded DNA binding protein 3	ENSG00000157216	-0.089175	-1.06376	0.232836	0.484924
16687583	FAM151A	family with sequence similarity 151, member A	ENSG00000162391	-0.0945817	-1.06776	0.32766	0.581577
16687598	PARS2	prolyl-tRNA synthetase 2, mitochondrial (putative)	ENSG00000162396	0.305998	1.23627	0.0192572	0.10192
16687602	TTC22	tetratricopeptide repeat domain 22	ENSG00000006555	-0.0501567	-1.03538	0.534743	0.745228
16687618	DHCR24	24-dehydrocholesterol reductase	ENSG00000116133	-1.06066	-2.08588	9.5293e-16	2.67048e-12
16687638	USP24	ubiquitin specific peptidase 24	ENSG00000162402	0.130565	1.09472	0.0718743	0.242574
16687719	LOC100507652			-0.171597	-1.1263	0.0521985	0.198971
16687737	PPAP2B	phosphatidic acid phosphatase type 2B	ENSG00000162407	-0.00226333	-1.00157	0.976622	0.990349
16687752	C1orf168	chromosome 1 open reading frame 168	ENSG00000187889	-0.0303633	-1.02127	0.622692	0.804964
16687779	C8B	complement component 8, beta polypeptide	ENSG00000021852	-0.0484167	-1.03413	0.489919	0.714298
16687799	DAB1	Dab, reelin signal transducer, homolog 1 (Drosophila)	ENSG00000173406	0.146982	1.10725	0.0281593	0.131338
16687825	DAB1	Dab, reelin signal transducer, homolog 1 (Drosophila)	ENSG00000173406	-0.0261183	-1.01827	0.778094	0.896039
16687827	DAB1	Dab, reelin signal transducer, homolog 1 (Drosophila)	ENSG00000173406	-0.00644167	-1.00448	0.971681	0.988229
16687829	OMA1	OMA1 zinc metallopeptidase	ENSG00000162600	0.445773	1.36204	6.08293e-08	5.8658e-06
16687847	TACSTD2	tumor-associated calcium signal transducer 2	ENSG00000184292	0.0562317	1.03975	0.38887	0.637638
16687851	MYSM1	Myb-like, SWIRM and MPN domains 1	ENSG00000162601	0.223765	1.16778	0.00227339	0.0215116
16687875	JUN	jun proto-oncogene	ENSG00000177606	0.238782	1.18	0.0203554	0.105858
16687899	HSD52	uncharacterized LOC729467	ENSG00000224609	-0.15229	-1.11133	0.0264896	0.125847
16687909	MIR4711	microRNA 4711	ENSG00000266150	-0.118547	-1.08564	0.162342	0.396339
16687914	CYP2J2	cytochrome P450, family 2, subfamily J, polypeptide 2	ENSG00000134716	0.071195	1.05059	0.339302	0.592263
16687931	C1orf87	chromosome 1 open reading frame 87	ENSG00000162598	0.026345	1.01843	0.680642	0.841464
16687952	LOC105378763	uncharacterized LOC105378763		0.0292267	1.02046	0.709463	0.857407
16687962	LOC101926964	uncharacterized LOC101926964	ENSG00000231252	-0.095885	-1.06872	0.248847	0.502569
16687969	NFIA-AS2	NFIA antisense RNA 2	ENSG00000237928	-0.110852	-1.07987	0.146971	0.373479
16687980	NFIA-AS1	NFIA antisense RNA 1	ENSG00000237853	-0.09441	-1.06763	0.304196	0.557903
16687985	TM2D1	TM2 domain containing 1	ENSG00000162604	0.372058	1.2942	0.000164104	0.00282975
16688002	MIR3116-2	microRNA 3116-2	ENSG00000263908	0.00658	1.00457	0.92658	0.968512
16688007	KANK4	KN motif and ankyrin repeat domains 4	ENSG00000132854	-0.101598	-1.07296	0.188148	0.429904
16688024	DOCK7	dedicator of cytokinesis 7	ENSG00000116641	0.22221	1.16652	0.00474308	0.0371627
16688094	LINC00466	long intergenic non-protein coding RNA 466		-0.0803367	-1.05726	0.311337	0.56563
16688113	RN5S49			-0.0961217	-1.0689	0.531466	0.74253
16688115	FOXD3-AS1	FOXD3 antisense RNA 1 (head to head)	ENSG00000230798	-0.105152	-1.07561	0.183812	0.425072
16688123	ITGB3BP	integrin beta 3 binding protein (beta3-endonexin)	ENSG00000142856	-0.0756417	-1.05383	0.172351	0.409984
16688153	ROR1-AS1	ROR1 antisense RNA 1	ENSG00000223949	-0.128802	-1.09339	0.071553	0.241923
16688162	RNU7-62P			-0.16761	-1.1232	0.244247	0.497152
16688164	JAK1	Janus kinase 1	ENSG00000162434	0.175968	1.12972	0.00183673	0.0183102
16688195	LINC01359	long intergenic non-protein coding RNA 1359	ENSG00000226891	0.183608	1.13572	0.109803	0.313302
16688210	MIR3671	microRNA 3671	ENSG00000265996	0.458813	1.37441	0.000339869	0.00491606
16688212	MIR101-1	microRNA 101-1	ENSG00000199135	-0.269792	-1.20563	0.00435766	0.0348391
16688216	LOC102724416	uncharacterized LOC102724416		-0.219147	-1.16404	0.0103239	0.0655911
16688219	LOC101927139	uncharacterized LOC101927139	ENSG00000227466	-0.136283	-1.09907	0.0686431	0.235905
16688230	INSL5	insulin-like 5	ENSG00000172410	-0.05846	-1.04135	0.411227	0.657473
16688235	WDR78	WD repeat domain 78	ENSG00000152763	0.0397667	1.02795	0.608559	0.795438
16688269	SLC35D1	solute carrier family 35 (UDP-GlcA/UDP-GalNAc transporter), member D1	ENSG00000116704	0.194075	1.14399	0.0266217	0.126273
16688287	C1orf141	chromosome 1 open reading frame 141	ENSG00000203963	-0.103752	-1.07456	0.123258	0.336645
16688308	SERBP1	SERPINE1 mRNA binding protein 1	ENSG00000142864	0.00138667	1.00096	0.981948	0.992444
16688323	GNG12	guanine nucleotide binding protein (G protein), gamma 12	ENSG00000172380	-0.118252	-1.08542	0.137795	0.359346
16688330	RNU7-80P			-0.0118683	-1.00826	0.942826	0.974983
16688332	DIRAS3	DIRAS family, GTP-binding RAS-like 3	ENSG00000162595	-0.175868	-1.12964	0.0349443	0.15245
16688339	WLS	wntless Wnt ligand secretion mediator	ENSG00000116729	-0.165492	-1.12155	0.0481542	0.188301
16688368	MIR1262	microRNA 1262	ENSG00000221203	-0.311883	-1.24133	0.011055	0.0688364
16688370	RPE65	retinal pigment epithelium-specific protein 65kDa	ENSG00000116745	-0.201895	-1.15021	0.0088548	0.0588943
16688386	DEPDC1	DEP domain containing 1	ENSG00000024526	0.0428817	1.03017	0.649806	0.822441
16688420	LRRC40	leucine rich repeat containing 40	ENSG00000066557	-0.0182767	-1.01275	0.780462	0.897307
16688441	ANKRD13C	ankyrin repeat domain 13C	ENSG00000118454	0.098805	1.07089	0.097864	0.292571
16688460	LOC102724548	uncharacterized LOC102724548		-0.0739033	-1.05256	0.319667	0.573457
16688469	PTGER3	prostaglandin E receptor 3 (subtype EP3)	ENSG00000050628	0.0556767	1.03935	0.443182	0.680029
16688487	ZRANB2	zinc finger, RAN-binding domain containing 2	ENSG00000132485	-0.0401733	-1.02824	0.426745	0.668756
16688506	NEGR1	neuronal growth regulator 1	ENSG00000172260	0.0649333	1.04604	0.405564	0.652305
16688521	NEGR1-IT1	NEGR1 intronic transcript 1	ENSG00000228853	-0.0763333	-1.05433	0.448658	0.68431
16688535	RN5S50			-0.201987	-1.15028	0.0150355	0.0855314
16688537	LRRIQ3	leucine-rich repeats and IQ motif containing 3	ENSG00000162620	-0.00667833	-1.00464	0.910346	0.961056
16688563	LRRC53			-0.0470883	-1.03318	0.602747	0.791122
16688574	ERICH3	glutamate-rich 3	ENSG00000178965	-0.0464183	-1.0327	0.478335	0.706911
16688594	CRYZ	crystallin, zeta (quinone reductase)	ENSG00000116791	-0.544037	-1.45805	9.96717e-06	0.000314277
16688615	SLC44A5	solute carrier family 44, member 5	ENSG00000137968	-0.119717	-1.08652	0.139308	0.362067
16688654	ASB17	ankyrin repeat and SOCS box containing 17	ENSG00000154007	-0.0449633	-1.03166	0.513424	0.729856
16688665	PIGK	phosphatidylinositol glycan anchor biosynthesis, class K	ENSG00000142892	0.231808	1.17431	0.00233702	0.0218936
16688683	ZZZ3	zinc finger, ZZ-type containing 3	ENSG00000036549	0.170913	1.12577	0.0214635	0.109456
16688708	USP33	ubiquitin specific peptidase 33	ENSG00000077254	0.292342	1.22463	9.01341e-05	0.00176296
16688748	NEXN-AS1	NEXN antisense RNA 1	ENSG00000235927	-0.116748	-1.08429	0.161385	0.39524
16688753	FUBP1	far upstream element (FUSE) binding protein 1	ENSG00000162613	-0.092015	-1.06586	0.0794436	0.25768
16688792	RN5S22			0.347152	1.27205	0.00764982	0.0530714
16688794	RN5S23			-0.0572033	-1.04045	0.656192	0.826677
16688799	ADGRL4	adhesion G protein-coupled receptor L4	ENSG00000162618	-0.100258	-1.07197	0.164574	0.399203
16688835	LOC101927434	uncharacterized LOC101927434	ENSG00000234953	0.0192933	1.01346	0.781952	0.897908
16688850	LINC01361	long intergenic non-protein coding RNA 1361	ENSG00000236268	-0.126598	-1.09172	0.0599116	0.216255
16688864	TTLL7	tubulin tyrosine ligase-like family member 7	ENSG00000137941	0.03482	1.02443	0.640498	0.816745
16688904	TTLL7-IT1	TTLL7 intronic transcript 1		0.02451	1.01713	0.817727	0.917027
16688912	UOX	urate oxidase, pseudogene		-0.0932283	-1.06675	0.237898	0.490326
16688929	GNG5	guanine nucleotide binding protein (G protein), gamma 5	ENSG00000174021	0.223607	1.16765	0.0309486	0.140276
16688937	CTBS	chitobiase, di-N-acetyl-	ENSG00000117151	0.473915	1.38887	2.8453e-07	1.98087e-05
16688955	LINC01555	long intergenic non-protein coding RNA 1555	ENSG00000180869	-0.149497	-1.10918	0.0452024	0.18101
16688961	SSX2IP	synovial sarcoma, X breakpoint 2 interacting protein	ENSG00000117155	0.0367383	1.02579	0.622693	0.804964
16688992	LPAR3	lysophosphatidic acid receptor 3	ENSG00000171517	0.0810417	1.05778	0.309259	0.563607
16688999	MCOLN2	mucolipin 2	ENSG00000153898	0.0591917	1.04188	0.376802	0.627168
16689020	MCOLN3	mucolipin 3	ENSG00000055732	0.074045	1.05266	0.234293	0.486577
16689042	SYDE2	synapse defective 1, Rho GTPase, homolog 2 (C. elegans)	ENSG00000097096	0.37797	1.29951	8.47624e-05	0.00168153
16689053	C1orf52	chromosome 1 open reading frame 52	ENSG00000162642	0.0466633	1.03287	0.470207	0.700573
16689060	BCL10	B-cell CLL/lymphoma 10	ENSG00000142867	-0.116205	-1.08388	0.0803788	0.259766
16689070	DDAH1	dimethylarginine dimethylaminohydrolase 1	ENSG00000153904	0.0651283	1.04618	0.506453	0.725838
16689098	ZNHIT6	zinc finger, HIT-type containing 6	ENSG00000117174	0.315077	1.24408	0.00609192	0.0447697
16689113	COL24A1	collagen, type XXIV, alpha 1	ENSG00000171502	0.0394733	1.02774	0.529223	0.741154
16689180	RN5S51			-0.099135	-1.07113	0.421121	0.664731
16689182	ODF2L	outer dense fiber of sperm tails 2-like	ENSG00000122417	0.0719883	1.05116	0.357347	0.60904
16689227	SEP15	15 kDa selenoprotein	ENSG00000183291	-0.029665	-1.02078	0.570111	0.769923
16689246	LINC01364	long intergenic non-protein coding RNA 1364	ENSG00000227290	0.0751767	1.05349	0.254933	0.508996
16689251	RN5S52			-0.0493017	-1.03476	0.6299	0.809817
16689268	PKN2-AS1	PKN2 antisense RNA 1	ENSG00000237505	-0.054255	-1.03832	0.681916	0.842471
16689275	GTF2B	general transcription factor IIB	ENSG00000137947	-0.135215	-1.09826	0.0768667	0.252517
16689289	CCBL2			0.266993	1.2033	1.84784e-05	0.000502833
16689312	GBP3	guanylate binding protein 3	ENSG00000117226	0.187328	1.13865	0.0291189	0.134528
16689330	GBP3			0.129412	1.09385	0.231723	0.483248
16689332	GBP1	guanylate binding protein 1, interferon-inducible	ENSG00000117228	-0.0119033	-1.00828	0.908005	0.960047
16689352	GBP2	guanylate binding protein 2, interferon-inducible	ENSG00000162645	-0.272312	-1.20774	0.00612976	0.0449762
16689354	GBP2	guanylate binding protein 2, interferon-inducible	ENSG00000162645	-0.40745	-1.32634	0.000487495	0.00649503
16689371	GBP7	guanylate binding protein 7	ENSG00000213512	-0.0828417	-1.0591	0.426702	0.668756
16689384	GBP4	guanylate binding protein 4	ENSG00000162654	0.175027	1.12899	0.122885	0.336051
16689400	GBP5	guanylate binding protein 5	ENSG00000154451	-0.0412283	-1.02899	0.53231	0.743089
16689422	FLJ27354	uncharacterized LOC400761	ENSG00000231999	-0.0284733	-1.01993	0.701497	0.85229
16689434	LOC101927952	uncharacterized LOC101927952		0.135533	1.0985	0.0268383	0.126997
16689441	LRRC8C			-0.02094	-1.01462	0.865035	0.940834
16689447	GEMIN8P4	gem (nuclear organelle) associated protein 8 pseudogene 4		0.0129233	1.009	0.895279	0.954133
16689460	BARHL2	BarH-like homeobox 2	ENSG00000143032	0.0806817	1.05752	0.391873	0.640267
16689465	LOC149351	uncharacterized LOC149351		0.0517267	1.0365	0.439949	0.677285
16689474	ZNF644	zinc finger protein 644	ENSG00000122482	0.0539267	1.03809	0.510223	0.728119
16689490	HFM1	HFM1, ATP-dependent DNA helicase homolog	ENSG00000162669	0.392347	1.31253	0.000136945	0.00245965
16689546	TGFBR3	transforming growth factor, beta receptor III	ENSG00000069702	-0.326445	-1.25392	6.00811e-06	0.00021467
16689581	GLMN	glomulin, FKBP associated protein	ENSG00000174842	0.226777	1.17022	0.0247736	0.120039
16689605	GFI1	growth factor independent 1 transcription repressor	ENSG00000162676	0.317813	1.24644	2.06176e-05	0.000549011
16689618	EVI5	ecotropic viral integration site 5	ENSG00000067208	0.133275	1.09678	0.247637	0.500906
16689650	FAM69A	family with sequence similarity 69, member A	ENSG00000154511	-0.136713	-1.0994	0.135197	0.355275
16689664	TMED5	transmembrane p24 trafficking protein 5	ENSG00000117500	-0.026675	-1.01866	0.692025	0.847681
16689678	LOC100131564	uncharacterized LOC100131564		0.656725	1.5765	3.72024e-06	0.000148795
16689704	RN5S53			-0.591088	-1.50638	2.07111e-05	0.000550563
16689706	BCAR3	breast cancer anti-estrogen resistance 3	ENSG00000137936	-0.118873	-1.08589	0.156073	0.387301
16689734	MIG7	mig-7		0.0387433	1.02722	0.685739	0.844515
16689737	DNTTIP2	deoxynucleotidyltransferase, terminal, interacting protein 2	ENSG00000067334	-0.1433	-1.10443	0.0488516	0.190179
16689752	GCLM	glutamate-cysteine ligase, modifier subunit	ENSG00000023909	0.147667	1.10778	0.0313663	0.141695
16689764	ABCA4	ATP-binding cassette, sub-family A (ABC1), member 4	ENSG00000198691	0.00644	1.00447	0.923936	0.967254
16689828	ARHGAP29	Rho GTPase activating protein 29	ENSG00000137962	-0.113912	-1.08216	0.05376	0.202283
16689869	F3	coagulation factor III (thromboplastin, tissue factor)	ENSG00000117525	-0.0906433	-1.06484	0.319949	0.573612
16689888	LINC01057	long intergenic non-protein coding RNA 1057	ENSG00000224081	0.00826	1.00574	0.914084	0.963001
16689907	CNN3	calponin 3, acidic	ENSG00000117519	-0.0183117	-1.01277	0.753274	0.882423
16689923	ALG14	ALG14, UDP-N-acetylglucosaminyltransferase subunit	ENSG00000172339	-0.104682	-1.07526	0.167982	0.404408
16689935	LOC101928118	uncharacterized LOC101928118	ENSG00000226026	-0.0591483	-1.04185	0.502736	0.723153
16689950	LOC101928169	uncharacterized LOC101928169		-0.0792967	-1.0565	0.299204	0.552831
16689960	LOC101928241	uncharacterized LOC101928241	ENSG00000231987	0.02256	1.01576	0.796271	0.905351
16689969	DPYD	dihydropyrimidine dehydrogenase	ENSG00000188641	0.174457	1.12854	0.0296869	0.136257
16690001	DPYD-IT1			0.0366867	1.02576	0.704484	0.854599
16690011	MIR137HG			-0.0168567	-1.01175	0.792028	0.903283
16690017	MIR2682			-0.0849217	-1.06063	0.157291	0.389334
[truncated: 27,798 more rows]

## Sheet: (1) Signature High OXPHOS
upregulated (FC>1.5, p<0.05) H/M vs H/M+MetF	upregulated (FC>1.5, p<0.05) H/M vs K/U		Signature HighOXPHOS
ABCB10	SEPT9		ABCB10
ABCF1	AAAS		ACBD3
ACAT2	ABCB10		ACSL3
ACBD3	ABCB11		AIF1
ACSL3	ABCC13		AKAP1
ADI1	ABCC6P1		ALDOC
ADRM1	ABCE1		ALG1
AIF1	ABHD11		ARHGEF18
AKAP1	ABHD3		ARL4D
ALDOC	ABT1		ATP5G1
ALG1	ACBD3		ATP6V1G2-DDX39B
ANKRD29	ACD		AURKAIP1
ANKRD35	ACER2		B4GALT2
ANLN	ACIN1		BCCIP
ANP32E	ACLY		BNIP3
ANXA1	ACN9		BRCA2
AP2M1	ACO2		BRMS1
AP2S1	ACP2		BUB3
APEX2	ACPP		C10orf125
ARHGDIA	ACSL3		C16orf80
ARHGEF18	ACSM5		C16orf91
ARL4D	ACSS3		C1orf112
ARL6IP1	ACTBL2		C6orf223
ARRB2	ACTL6A		CALR
ARRDC4	ADAM6		CBR1
ASNA1	ADAMTS1		CCSAP
ATAD2	ADAMTS20		CCT3
ATP5G1	ADAMTS5		CD151
ATP5J2	ADCYAP1R1		CD320
ATP6V0A1	ADIPOR1		CDC45
ATP6V1G2-DDX39B	ADIPOR2		CDC6
AURKAIP1	AFAP1-AS1		CDK1
AURKB	AGAP11		CDK2
B4GALT2	AGBL3		CERK
BAG6	AGBL4		CHML
BCCIP	AGXT2L1		CHTF8
BCL2L12	AHCTF1		CLIC1
BIRC5	AHNAK		COG8
BNIP3	AHNAK2		COMMD8
BRCA2	AIF1		COMMD9
BRMS1	AKAP1		COPB2
BUB1	AKAP8		CRELD2
BUB3	AKIRIN2-AS1		CSNK1G1
BZW1	ALDH3A2		CXXC1
C10orf125	ALDOC		DAXX
C12orf23	ALG1		DEPDC7
C12orf32	ALG12		DERL3
C14orf1	ALG1L2		DGCR8
C15orf42	ALG5		DHX9
C16orf5	ALKBH4		DNAJA1
C16orf80	ALX4		DNAJB11
C16orf91	ALYREF		DNTTIP1
C17orf79	AMD1		DPM1
C19orf53	AMTN		DTL
C1orf112	ANAPC10		DTYMK
C20orf4	ANKRD13A		DUS3L
C6orf223	ANKRD18A		DUSP23
C8orf33	ANKRD18B		DVL2
CALR	ANKRD53		E2F7
CANT1	ANKRD9		ECRP
CBR1	ANO5		EIF4A3
CCDC109B	ANO7		EIF4EBP2
CCDC167	ANXA5		EIF4G1
CCDC56	ANXA8		EPX
CCDC86	ANXA8L1		EXO1
CCL23	AP1B1		FARSA
CCNA1	AP1S3		FASN
CCNA2	APEX1		FBXO16
CCNB1	APH1A		FKBPL
CCND3	APOBEC3C		FPGS
CCNE1	AQP2		GDF11
CCNE2	ARF1		GINS3
CCNF	ARF3		GLYR1
CCSAP	ARFGAP2		GNA11
CCT3	ARFIP1		GPR183
CD151	ARGFX		GTSE1
CD320	ARHGAP29		H3F3B
CD83	ARHGEF11		HIST1H2BG
CD97	ARHGEF18		HIST1H3J
CDC20	ARL16		HIST1H4D
CDC25A	ARL4D		HIST2H2AA4
CDC45	ARL5C		HIST2H3D
CDC6	ARL6IP4		HIST2H4B
CDCA2	ARMC9		HLA-DMA
CDCA5	ARSJ		HMGB3P1
CDCA8	ART1		HSP90B1
CDIPT	ASB1		HSPA5
CDK1	ASB12		HSPH1
CDK2	ASB16		IL17RA
CDK2AP1	ASTL		ISG20L2
CDKN3	ATAD5		ISOC1
CENPM	ATAT1		KIF11
CENPO	ATG13		KIF20B
CENPW	ATG16L1		KIF24
CERK	ATG5		KIFC1
CETN2	ATOX1		KITLG
CHAF1A	ATP5B		KLHDC3
CHAF1B	ATP5D		KLK3
CHEK1	ATP5F1		LGR4
CHID1	ATP5G1		LINC00467
CHML	ATP5H		LINC00514
CHMP4B	ATP6V0C		LMNB1
CHRNA5	ATP6V1E1		LOC100129048
CHTF8	ATP6V1G2-DDX39B		LOC100289061
CKS2	ATP8B1		LOC100506165
CLECL1	ATXN7L1		LOC727803
CLIC1	AURKAIP1		LRRC26
CLN6	B3GALT5		LRRC49
CLPP	B4GALT2		LRRC59
CLPTM1	BAG1		MARCKSL1
COG8	BAK1		MAZ
COMMD8	BBS12		MED31
COMMD9	BCAP29		METTL13
COPB2	BCAR1		MICAL2
CPPED1	BCCIP		MKI67
CRELD2	BCL7A		MOGAT3
CRYZ	BCLAF1		MRPL12
CSE1L	BDNF-AS		MRPS12
CSNK1G1	BECN1		MRPS34
CSNK1G2	BEND2		MRPS7
CSTB	BEND3		MRTO4
CTR9	BICD2		MS4A4A
CTSA	BID		MVK
CXXC1	BIK		MYL6
CYBA	BLM		NAT8L
CYP51A1	BMS1		NCAPG
DAXX	BMS1P1		NCOA5
DBI	BMS1P2		NDC80
DCBLD2	BMS1P4		NETO2
DCTPP1	BNIP3		NFYB
DCXR	BPGM		NOC4L
DEPDC7	BPNT1		NRARP
DERL3	BRAP		NUTF2
DGCR8	BRCA2		NXT2
DHCR24	BRD2		ORMDL2
DHCR7	BRD3		P2RY2
DHX9	BRD8		PDE4A
DLGAP5	BRI3BP		PDIA4
DNAJA1	BRIX1		PI4K2A
DNAJB1	BRMS1		PIH1D1
DNAJB11	BTAF1		PIM2
DNMT1	BTNL9		PKMYT1
DNTTIP1	BUB3		PLCXD2-AS1
DPM1	BZRAP1		PLK2
DPP9	C10orf10		POLE3
DTL	C10orf125		POLR2A
DTYMK	C10orf137		POLR2B
DUS3L	C10orf2		POLR2C
DUSP23	C10orf85		POLR3K
DVL2	C10orf91		POMP
E2F7	C11orf16		POP4
E2F8	C11orf48		POP7
EBP	C12orf10		PRMT7
ECRP	C12orf26		PSMC3
EFNB1	C12orf29		PSME3
EFTUD2	C12orf39		PTBP1
EHD1	C12orf76		PXMP2
EI24	C14orf119		QRICH1
EIF1AD	C14orf93		RAB35
EIF4A3	C16orf13		RBM19
EIF4EBP2	C16orf54		RFC3
EIF4G1	C16orf59		RFC5
EIF4G2	C16orf80		RNF5
ELL2	C16orf91		RNPS1
ELOF1	C17orf70		RPS26
EMC10	C17orf72		SCD
EMP3	C18orf12		SDF2L1
EPX	C19orf25		SEH1L
ERCC6L	C19orf44		SF3A1
ERO1L	C19orf48		SF3B5
EXO1	C19orf67		SFXN5
FADS1	C19orf70		SIRT6
FADS2	C1orf112		SKAP1
FAM101B	C1orf158		SKP2
FAM105A	C1orf182		SLC25A1
FAM118B	C1orf186		SLC25A10
FAM168B	C1orf35		SLC25A19
FAM46A	C1orf54		SLC29A1
FAM64A	C20orf26		SMARCD2
FANCA	C22orf28		SNRPD1
FANCI	C2orf51		SPAG5
FARSA	C3P1		SPN
FASN	C4BPB		SREBF1
FBXO16	C4orf27		SRSF2
FBXO21	C4orf47		ST3GAL6-AS1
FBXO33	C4orf48		STRA13
FBXW5	C4orf6		SUPT4H1
FDFT1	C5orf47		SWSAP1
FEN1	C5orf51		SYNCRIP
FKBP4	C5orf52		TAC1
FKBPL	C6orf120		TECR
FOXE3	C6orf223		THOC6
FOXM1	C6orf47		TIMM13
FOXRED2	C6orf48		TIMM21
FPGS	C6orf62		TK1
FTSJ3	C7orf23		TLCD1
GAPT	C7orf49		TMEM8A
GBE1	C7orf60		TNPO2
GDF11	C9orf100		TRA2B
GEMIN4	C9orf114		TREX1
GINS1	C9orf142		TRIAP1
GINS2	C9orf156		TRIM28
GINS3	CA8		TRIP13
GINS4	CACNG1		TUBB
GIPC1	CACYBP		TULP3
GLIPR1	CADM2		TXNDC17
GLT25D1	CALR		TXNIP
GLUL	CANX		TYMS
GLYR1	CAP1		UBAP2L
GNA11	CAPN3		UBE2C
GNA15	CAPRIN1		UBL5
GOT2	CAPZA3		UHRF1
GPR183	CARD11		UNC93B1
GPSM2	CARKD		UNG
GRWD1	CAV3		UTP20
GTF3C4	CBR1		VPS25
GTSE1	CBX8		XRCC6BP1
H2AFX	CCDC108		YDJC
H3F3A	CCDC117		ZBTB40
H3F3B	CCDC135		ZBTB9
HDHD1	CCDC28A		ZWINT
HECTD3	CCDC38
HIST1H2AB	CCDC59
HIST1H2AI	CCDC75
HIST1H2BG	CCDC97
HIST1H2BM	CCL16
HIST1H3J	CCL17
HIST1H4D	CCL26
HIST1H4L	CCL8
HIST2H2AA4	CCND1
HIST2H3D	CCNI2
HIST2H4B	CCR7
HLA-DMA	CCSAP
HMGB3P1	CCT2
HMGCR	CCT3
HMGCS1	CCT5
HN1	CD151
HN1L	CD209
HNRNPL	CD320
HNRNPM	CD40
HSD17B10	CD84
HSD17B7	CD86
HSD52	CDC14A
HSP90B1	CDC14C
HSPA1A	CDC25C
HSPA1B	CDC37
HSPA5	CDC45
HSPA8	CDC5L
HSPBP1	CDC6
HSPH1	CDH24
HTATSF1	CDK1
IDI1	CDK2
IL17RA	CDK4
IL6R	CDK5
ILF3	CDKL4
IMP4	CDKN2AIP
IMPDH1	CDKN2AIPNL
INCENP	CDX2
INSIG1	CDX4
ISG20L2	CEBPD
ISOC1	CELA2A
ISOC2	CEMP1
JUND	CENPL
KBTBD8	CENPQ
KEAP1	CEP76
KHSRP	CEP97
KIAA1731	CERK
KIAA1967	CES2
KIF11	CFD
KIF20A	CGA
KIF20B	CHCHD1
KIF23	CHCHD10
KIF24	CHCHD3
KIF4A	CHD7
KIFC1	CHML
KITLG	CHRNA3
KLHDC3	CHST4
KLK3	CHST9-AS1
KPNA2	CHTF8
KPNB1	CHTOP
LDLR	CHUK
LGALS1	CLDN12
LGALS12	CLDN7
LGR4	CLIC1
LIG1	CLK2
LINC00467	CLPTM1L
LINC00514	CLRN1-AS1
LMNA	CNOT8
LMNB1	COG8
LOC100129048	COL8A2
LOC100129518	COMMD6
LOC100288432	COMMD8
LOC100289061	COMMD9
LOC100289473	COPB2
LOC100506165	COPZ1
LOC100506422	COQ3
LOC390806	COQ7
LOC727803	CORO7-PAM16
LOC727896	COTL1
LPCAT3	COX6A1
LRG1	COX7A2
LRRC26	COX7C
LRRC49	CPSF6
LRRC59	CPZ
LSM4	CREBL2
LSMD1	CRELD2
LSS	CRHR2
LST1	CRIM1
LZTS1-AS1	CRYBB1
MAGT1	CS
MANF	CSN2
MAP3K8	CSNK1G1
MARCKSL1	CSNK2B
MAZ	CSPG4
MCM10	CSPG4P1Y
MCM2	CST1
MCM3	CST2
MCM5	CST8
MCM7	CT45A2
MCOLN1	CTDSP1
MED31	CTNS
MEGF9	CTSE
MELK	CTSL1P2
MEN1	CTTNBP2NL
MEPCE	CWF19L1
METTL13	CXADR
MEX3D	CXorf41
MFAP1	CXorf68
MFNG	CXXC1
MICAL2	CYB561D2
MIR181B1	CYB5B
MKI67	CYB5R1
MLC1	CYB5R4
MLEC	CYFIP1
MLKL	CYP19A1
MLLT1	CYP26B1
MNDA	CYP2C8
MOGAT3	CYSTM1
MRPL12	DACH1
MRPL49	DAD1
MRPS12	DAPK3
MRPS34	DAPP1
MRPS7	DAXX
MRTO4	DAZAP1
MS4A3	DBN1
MS4A4A	DBNDD2
MSMO1	DBR1
MSN	DCAF12
MSRB1	DCAF6
MTRNR2L5	DCDC1
MVD	DCDC2
MVK	DCDC5
MYBL2	DCP2
MYL6	DDN
MYO1B	DDT
NAT8L	DDTL
NCAPG	DDX18
NCAPH	DDX19B
NCLN	DDX21
NCOA5	DDX27
NDC80	DDX28
NDUFA6	DDX39B
NETO2	DDX41
NEU1	DDX46
NFE2	DDX47
NFYB	DDX49
NINJ1	DDX54
NOC4L	DDX55
NOP10	DECR2
NRARP	DEFA1B
NRGN	DEFA4
NS3BP	DEFA6
NSDHL	DEFB118
NT5DC2	DEFB133
NUDT5	DEK
NUP85	DENND5B
NUSAP1	DEPDC5
NUTF2	DEPDC7
NXT2	DERL3
OAZ2	DGAT2L6
ODC1	DGCR11
OR8J1	DGCR14
ORMDL2	DGCR8
P2RY2	DHH
P2RY8	DHRS9
PAF1	DHX16
PAICS	DHX32
PCED1B-AS1	DHX33
PCNA	DHX37
PCNA-AS1	DHX38
PCYT2	DHX8
PDE4A	DHX9
PDIA4	DIABLO
PDK3	DIRAS3
PDP1	DIS3
PDSS1	DIXDC1
PEX3	DLG3
PGBD5	DLGAP2
PGRMC1	DMBX1
PI4K2A	DNA2
PIH1D1	DNAH7
PIM2	DNAJA1
PKMYT1	DNAJB11
PLCXD2-AS1	DNAJB12
PLK1	DNAJC9-AS1
PLK2	DNALI1
PLOD1	DNM1
PNP	DNTTIP1
PNPLA1	DNTTIP2
POLA1	DOCK4
POLE3	DOCK6
POLR2A	DOK5
POLR2B	DPCD
POLR2C	DPH2
POLR2E	DPM1
POLR2I	DPPA2
POLR2J	DPPA5
POLR3K	DPY19L2P4
POMP	DPYSL3
POP4	DRD3
POP7	DRG1
PPP1R8	DSCR10
PPP2R1A	DTL
PRC1	DTYMK
PRG2	DUS3L
PRMT7	DUSP18
PRPF31	DUSP23
PRTN3	DVL2
PSMB6	DYDC1
PSMC3	DYNC1I1
PSMC4	DZANK1
PSMD1	DZIP1
PSMD3	E2F7
PSME3	EAPP
PTBP1	ECD
PXMP2	ECHDC2
QRICH1	ECHS1
RAB1B	ECI1
RAB35	ECRP
RAD54L	ECSCR
RAD9A	EDC4
RASSF2	EDF1
RBM19	EEFSEC
RBMX	EGFL8
RCC2	EGFLAM-AS3
RECQL4	EIF1AX-AS1
RELL1	EIF2B1
RFC2	EIF3A
RFC3	EIF3D
RFC5	EIF3G
RFWD3	EIF3IP1
RHOBTB2	EIF3K
RNASE2	EIF4A3
RNF25	EIF4B
RNF26	EIF4E2
RNF5	EIF4EBP2
RNPS1	EIF4G1
ROPN1L	ELAVL4
RPA1	ELMOD1
RPS26	ENDOG
RRM2	ENSA
RRP36	ENTPD7
S100A14	EP300
SAFB2	EPOR
SAMD1	EPS8L1
SAP130	EPX
SAPCD2	ERC2-IT1
SCD	ERI2
SDF2L1	ERP29
SEC22C	ERVK3-1
SEC61B	ERVMER34-1
SEH1L	ESF1
SESN3	ESYT1
SF3A1	ETNK1
SF3A2	ETV1
SF3B3	ETV3L
SF3B5	EVI5
SFXN5	EXO1
SGK223	EZH2
SHCBP1	EZR
SHKBP1	EZR-AS1
SIGLEC10	F9
SIN3A	FABP1
SIRPB1	FABP3
SIRPD	FAF2
SIRT6	FAM110B
SKAP1	FAM114A2
SKP2	FAM117B
SLC25A1	FAM134C
SLC25A10	FAM138B
SLC25A19	FAM13B
SLC29A1	FAM13C
SLC29A2	FAM160A1
SLC39A7	FAM162B
SLC43A3	FAM173A
SLC46A3	FAM175B
SLC9A3R1	FAM176B
SLCO1B1	FAM187B
SLCO4C1	FAM189B
SMARCD2	FAM195A
SNN	FAM204A
SNORA26	FAM225B
SNORA76	FAM26D
SNRNP25	FAM35A
SNRPB	FAM46B
SNRPD1	FAM47E
SORT1	FAM53B
SPAG5	FAM53C
SPC25	FAM59B
SPN	FAM60A
SQLE	FAM74A6
SREBF1	FAM83H
SREBF2	FAM91A2
SRSF2	FAM95B1
SSSCA1	FAM96B
ST3GAL6-AS1	FARSA
STMN1	FASN
STRA13	FASTKD3
STS	FBL
SUPT4H1	FBN2
SUPT5H	FBRSL1
SWSAP1	FBXL12
SYNCRIP	FBXL3
SYNGR2	FBXO16
TAC1	FBXO2
TARP	FBXO28
TCEB2	FBXO45
TCF19	FBXO5
TECR	FBXO8
TEX261	FCGR1B
TFPT	FCGR2B
TGFB1	FDPS
THOC6	FGF12-AS2
TIMM13	FGF16
TIMM21	FGFBP3
TIMM22	FICD
TIMM8B	FKBP15
TJP2	FKBPL
TK1	FLJ20444
TLCD1	FLJ25758
TMED9	FLJ33360
TMEM214	FLJ35946
TMEM53	FLJ40288
TMEM67	FLJ46365
TMEM8A	FLOT2
TNFSF10	FLVCR1
TNPO2	FMO5
TOE1	FNBP1L
TOMM40	FOXE1
TONSL	FOXF1-AS1
TOP1	FPGS
TOP2A	FRG1
TPGS2	FTSJ2
TPX2	FUBP1
TRA2B	FZD3
TRAPPC2L	G3BP1
TREX1	GABRP
TRIAP1	GADD45GIP1
TRIM28	GALM
TRIP13	GAPDH
TRMT112	GAPVD1
TSPAN14	GATC
TSTA3	GBX2
TUBB	GCAT
TUBB6	GCHFR
TULP3	GCN1L1
TXNDC17	GDEP
TXNIP	GDF1
TYMS	GDF11
U2AF2	GEMIN5
UBAP2L	GFER
UBE2C	GGT7
UBE2T	GHDC
UBL5	GHITM
UBQLN4	GIMAP4
UBR7	GINS3
UHRF1	GJA3
UNC93B1	GJB6
UNG	GLRA3
UPF2	GLYR1
UQCR10	GMEB1
USP1	GMNN
UTP20	GNA11
VCL	GNAI3
VCP	GNB3
VPS25	GNG4
VPS35	GOLPH3L
WBSCR16	GORAB
WDR34	GPATCH2
WFDC13	GPATCH4
XRCC6BP1	GPM6B
YDJC	GPN3
ZBTB40	GPR137B
ZBTB9	GPR17
ZC3H18	GPR183
ZC3H4	GPR27
ZDHHC5	GPR85
ZNF367	GPX6
ZNF385A	GRIK1-AS2
ZNF395	GRM3
ZW10	GRM7-AS3
ZWINT	GSPT1
	GSTA2
	GSTA7P
	GSTT2
	GTF2B
	GTSE1
	GUSBP10
	GZMB
	H3F3B
	HAO2
	HARS
	HAS3
	HAUS1
	HBD
	HCG21
	HDDC2
	HEATR3
	HECW1-IT1
	HECW2
	HELLS
	HEPHL1
	HES3
	HES7
	HHLA2
	HIF1AN
	HILPDA
	HIST1H1T
	HIST1H2AD
	HIST1H2AH
	HIST1H2AK
	HIST1H2BD
	HIST1H2BG
	HIST1H2BJ
	HIST1H2BL
	HIST1H3H
	HIST1H3J
	HIST1H4D
	HIST1H4G
	HIST2H2AA4
	HIST2H2BC
	HIST2H2BF
	HIST2H3D
	HIST2H4B
	HIVEP1
	HLA-DMA
	HLA-DMB
	HLA-DPA1
	HLA-DPB1
	HLA-DQA2
	HMGB1
	HMGB2
	HMGB3P1
	HMHB1
	HNF1B
	HNRNPA1
	HNRNPF
	HNRNPK
	HNRPLL
	HOXB13
	HOXC13
	HPDL
	HPN
	HPS5
	HPS6
	HRG
	HSD3B2
	HSP90AB1
	HSP90AB3P
	HSP90B1
	HSPA4
	HSPA5
	HSPH1
	IBA57
	ID3
	IDE
	IER3IP1
	IFLTD1
	IFNA5
	IFNA6
	IFT172
	IGBP1
	IGF2BP1
	IGHA2
	IGHV3-35
	IGK@
	IGKC
	IGKV1-27
	IGKV3D-7
	IGLV1-44
	IGLV2-33
	IGLV3-19
	IGLV4-60
	IK
	IKBIP
	IKBKAP-IT1
	IKZF2
	IKZF3
	IKZF4
	IKZF5
	IL17RA
	IL23A
	IL33
	IL5RA
	ILDR2
	ILVBL
	INMT-FAM188B
	INSL4
	INTS7
	IPO4
	IPW
	IQCE
	IQCF6
	IQCK
	IQGAP3
	IRF7
	IRX3
	IRX5
	IRX6
	ISG20L2
	ISOC1
	ITCH-AS1
	ITIH3
	JMJD4
	JUNB
	KATNAL1
	KBTBD5
	KCNB1
	KCND3-IT1
	KCNJ12
	KCNMB2
	KCNQ4
	KCTD5
	KDELC1
	KDM2B
	KIAA0040
	KIAA0100
	KIAA0664
	KIAA0825
	KIAA0907
	KIAA0922
	KIAA0930
	KIAA0947
	KIAA1009
	KIAA1279
	KIAA1377
	KIAA1598
	KIF11
	KIF13A
	KIF20B
	KIF24
	KIF9
	KIFC1
	KIFC3
	KIRREL3-AS2
	KITLG
	KLB
	KLF11
	KLHDC3
	KLHDC8B
	KLHL13
	KLHL17
	KLHL4
	KLK3
	KLRAP1
	KMO
	KPNA7
	KRT10
	KRT12
	KRT18P54
	KRT84
	KRTAP10-2
	KRTAP10-5
	KRTAP13-1
	KRTAP20-1
	KRTAP2-2
	KRTAP4-1
	KRTAP4-3
	KRTAP9-9
	KXD1
	L3MBTL4
	LAMA2
	LAMC2
	LAMP3
	LARGE
	LARP4
	LARP6
	LCE1E
	LCE2C
	LDHB
	LEMD3
	LEPREL1
	LGALS14
	LGALS16
	LGR4
	LIMD2
	LIN28B
	LIN7C
	LINC00028
	LINC00029
	LINC00052
	LINC00263
	LINC00452
	LINC00461
	LINC00462
	LINC00467
	LINC00514
	LINC00529
	LINC00593
	LLPH
	LMNB1
	LMO2
	LOC100128239
	LOC100128560
	LOC100129048
	LOC100129148
	LOC100129297
	LOC100129662
	LOC100129722
	LOC100130458
	LOC100133050
	LOC100134285
	LOC100287042
	LOC100288018
	LOC100288346
	LOC100289061
	LOC100289079
	LOC100289488
	LOC100498859
	LOC100505613
	LOC100505835
	LOC100506050
	LOC100506075
	LOC100506165
	LOC100506195
	LOC100506314
	LOC100506633
	LOC100506689
	LOC100506837
	LOC100506844
	LOC100506882
	LOC100506948
	LOC100506995
	LOC100507222
	LOC100507246
	LOC100507378
	LOC100507452
	LOC100507513
	LOC100507632
	LOC100509129
	LOC100509683
	LOC100652907
	LOC100653116
	LOC100653167
	LOC100653331
	LOC124685
	LOC144742
	LOC148413
	LOC154449
	LOC201477
	LOC220729
	LOC255654
	LOC283335
	LOC284930
	LOC285857
	LOC339760
	LOC340107
	LOC340357
	LOC349160
	LOC390705
	LOC399829
	LOC400499
	LOC401068
	LOC401397
	LOC401980
	LOC440335
	LOC440910
	LOC494141
	LOC643529
	LOC727803
	LOC728034
	LOC728093
	LOC728196
	LOC728643
	LOC728755
	LOC728855
	LOC729348
	LOC729968
	LOC730100
	LOC730811
	LOXHD1
	LPPR3
	LRBA
	LRCOL1
	LRP6
	LRRC26
	LRRC34
	LRRC45
	LRRC49
	LRRC59
	LRRIQ4
	LRRK1
	LRWD1
	LSM6
	LY6K
	LYPD6B
	LYRM7
	LYSMD3
	LYZL1
	M6PR
	MAEL
	MAGEA11
	MAGEA2
	MAGEF1
	MAGOHB
	MAK
	MANBAL
	MANSC1
	MAP1LC3A
	MAP3K1
	MAP6D1
	MARCH1
	MARCKSL1
	MAS1L
	MAT2B
	MATK
	MAZ
	MBL2
	MC2R
	MCAT
	MCL1
	MCMBP
	MCRS1
	MDC1
	MDC1-AS1
	MDH1
	MDP1
	MED1
	MED10
	MED15
	MED31
	MED7
	MEG3
	METAP2
	METTL1
	METTL13
	METTL14
	METTL17
	METTL21A
	METTL2A
	MFAP3
	MFSD5
	MGA
	MGST1
	MICAL2
	MIDN
	MIPEP
	MIR107
	MIR1245A
	MIR1245B
	MIR1255B1
	MIR1260A
	MIR1302-11
	MIR133A1
	MIR17HG
	MIR193A
	MIR196A2
	MIR219-2
	MIR25
	MIR302C
	MIR3122
	MIR3143
	MIR3150A
	MIR3158-1
	MIR3183
	MIR320B1
	MIR33A
	MIR3668
	MIR3676
	MIR384
	MIR3914-2
	MIR3925
	MIR3941
	MIR411
	MIR4290
	MIR4327
	MIR4422
	MIR4463
	MIR4472-1
	MIR4519
	MIR4521
	MIR4533
	MIR4653
	MIR4705
	MIR495
	MIR508
	MIR548V
	MIR550B1
	MIR93
	MIR944
	MKI67
	MKL1
	MKS1
	MLF1IP
	MLF2
	MLL5
	MLLT4
	MLNR
	MMAB
	MMACHC
	MMP10
	MMS22L
	MNS1
	MOGAT3
	MOXD1
	MPO
	MPRIP-AS1
	MRAP2
	MRI1
	MRPL1
	MRPL12
	MRPL22
	MRPL27
	MRPL28
	MRPL35
	MRPL4
	MRPL41
	MRPL44
	MRPL45
	MRPL47
	MRPL50
	MRPL52
	MRPL54
	MRPS12
	MRPS14
	MRPS16
	MRPS18A
	MRPS18B
	MRPS21
	MRPS22
	MRPS30
	MRPS31
	MRPS34
	MRPS7
	MRS2
	MRTO4
	MS4A4A
	MSGN1
	MT1A
	MT1DP
	MTERF
	MTMR6
	MTMR8
	MTRF1
	MTRNR2L10
	MTRR
	MTSS1L
	MUC19
	MVK
	MYADM
	MYBPH
	MYEOV2
	MYF6
	MYH9
	MYL6
	MYL6B
	MYOD1
	MZF1
	N6AMT2
	NAA60
	NAB2
	NABP2
	NACA
	NANOS1
	NAT14
	NAT8L
	NAV3
	NCAPG
	NCAPH2
	NCOA4
	NCOA5
	NCOR1P1
	NDC80
	NDFIP2
	NDFIP2-AS1
	NDOR1
	NDUFA2
	NDUFA7
	NDUFB10
	NDUFB3
	NDUFB8
	NDUFS1
	NDUFS3
	NDUFS6
	NEDD1
	NETO2
	NFKBIA
	NFKBIB
	NFYB
	NIF3L1
	NIPAL3
	NKAIN1
	NKX2-1
	NKX6-1
	NLE1
	NLGN4Y
	NME4
	NOC3L
	NOC4L
	NOL11
	NOL12
	NOL6
	NOL7
	NOL8
	NOLC1
	NOP14-AS1
	NOP16
	NOP9
	NOX5
	NOXO1
	NPFF
	NPPC
	NPTX2
	NPVF
	NPW
	NR2F1
	NRARP
	NRAS
	NRBF2
	NRM
	NSMCE1
	NT5C
	NTHL1
	NTRK3-AS1
	NUBP2
	NUDT1
	NUDT13
	NUDT15
	NUDT18
	NUDT3
	NUDT7
	NUP153
	NUP155
	NUP160
	NUP188
	NUP214
	NUP37
	NUP88
	NUS1
	NUTF2
	NXT2
	OBSL1
	OCLN
	OCSTAMP
	OGDHL
	OLAH
	OLIG3
	OPALIN
	OPN4
	OR10H5
	OR12D3
	OR13C8
	OR13H1
	OR1N2
	OR2H2
	OR2M2
	OR2T33
	OR4A5
	OR52L1
	OR5AN1
	OR6C1
	OR6P1
	OR7A2P
	OR7A5
	OR7E2P
	ORM1
	ORMDL2
	OSR2
	OTOS
	OTUD4
	OTUD7B
	P2RY2
	P2RY4
	P4HA1
	PA2G4
	PAIP2
	PAK1IP1
	PALM
	PANK1
	PARD6A
	PARG
	PARP1
	PARP4
	PARP8
	PAR-SN
	PASK
	PAX3
	PAX6
	PCBP2
	PCDH20
	PCDHB1
	PCSK1
	PDDC1
	PDE3B
	PDE4A
	PDE6D
	PDIA4
	PDILT
	PDLIM5
	PDLIM7
	PDPK2
	PELI1
	PELP1
	PER1
	PES1
	PET112
	PEX16
	PFAS
	PFDN1
	PFDN5
	PFDN6
	PGAM1
	PGAM4
	PGAM5
	PGGT1B
	PGM2
	PGM3
	PHAX
	PHB2
	PHF1
	PI4K2A
	PIDD
	PIGB
	PIGQ
	PIGW
	PIH1D1
	PIK3R4
	PIM2
	PIPSL
	PISD
	PKIB
	PKMYT1
	PKP1
	PKP3
	PLB1
	PLCL1
	PLCXD1
	PLCXD2-AS1
	PLEKHA1
	PLEKHA4
	PLEKHJ1
	PLK2
	PLXNA2
	PMM2
	PMPCA
	PNRC1
	PODXL2
	POLE3
	POLR1D
	POLR2A
	POLR2B
	POLR2C
	POLR2J2
	POLR3A
	POLR3B
	POLR3G
	POLR3K
	POMP
	POP4
	POP7
	POPDC3
	POTEE
	POTEF
	POU3F1
	POU3F2
	PP12613
	PPARGC1B
	PPFIA2
	PPHLN1
	PPIAL4A
	PPIL2
	PPIL4
	PPIP5K1
	PPM1D
	PPP1R27
	PPP1R2P9
	PPP1R3G
	PPP1R7
	PPP6C
	PPT2-EGFL8
	PRAMEF15
	PRDX3
	PREB
	PRIM1
	PRIM2
	PRMT5
	PRMT7
	PROK2
	PRPF4
	PRPF6
	PRR13
	PRSS27
	PRY
	PSG4
	PSG8
	PSMB1
	PSMB10
	PSMC3
	PSMC3IP
	PSMD8
	PSME3
	PSORS1C2
	PTBP1
	PTGES3
	PTGES3L-AARSD1
	PTMA
	PTPN11
	PTPN13
	PTPN5
	PTPN7
	PTPRB
	PTRH2
	PTTG2
	PUS1
	PUS7
	PUSL1
	PWP1
	PXMP2
	QRICH1
	QRSL1
	QTRTD1
	RAB35
	RAB3A
	RAB42
	RAB5C
	RAB6B
	RABGGTB
	RAC2
	RAD1
	RAD51
	RAN
	RANBP1
	RAPH1
	RARS2
	RASAL2
	RASD1
	RASGEF1A
	RASL11B
	RASSF3
	RASSF5
	RBM15
	RBM19
	RBM22
	RBM23
	RBM27
	RBPJ
	RCC1
	RDH13
	RDH5
	RECQL
	REEP1
	RET
	RETSAT
	RFC3
	RFC5
	RGS7BP
	RHBDL3
	RHOBTB3
	RHOT2
	RIC8B
	RING1
	RIPK4
	RIPPLY1
	RMI1
	RN5-8S3
	RN5S112
	RN5S127
	RN5S141
	RN5S195
	RN5S20
	RN5S212
	RN5S237
	RN5S246
	RN5S255
	RN5S259
	RN5S261
	RN5S272
	RN5S295
	RN5S335
	RN5S374
	RN5S398
	RN5S408
	RN5S427
	RN5S50
	RN5S510
	RN5S514
	RN5S53
	RN5S55
	RN5S86
	RNASE6
	RNF144B
	RNF181
	RNF34
	RNF40
	RNF5
	RNF6
	RNGTT
	RNPS1
	RNU1-16P
	RNU12
	RNU5A-8P
	RNU5F-3P
	RNU5F-4P
	RNU7-49P
	RNY3P7
	ROMO1
	ROPN1L-AS1
	RPE65
	RPF2
	RPL11
	RPL12
	RPL23
	RPL26
	RPL27A
	RPL32
	RPL34
	RPL35
	RPL35A
	RPL36
	RPL37
	RPL41
	RPL6
	RPL7A
	RPLP0
	RPP30
	RPRD2
	RPS11
	RPS12
	RPS14
	RPS15
	RPS18
	RPS21
	RPS26
	RPS27
	RPS27A
	RPS3A
	RPS6KA6
	RPS6KL1
	RPS9
	RPSA
	RRP12
	RUNDC1
	RUSC1
	RUVBL1
	RYR1
	RYR3
	S100A10
	SACS-AS1
	SAMHD1
	SAMM50
	SAP18
	SAR1A
	SATB2
	SCARB1
	SCD
	SCG2
	SCO2
	SDC1
	SDF2L1
	SEC11C
	SEC14L3
	SEC23B
	SEC24C
	SEC62
	SEH1L
	SEL1L2
	SEMA3D
	SENP1
	SEPP1
	SERPINB12
	SERPINB4
	SERPINB5
	SETD1B
	SF3A1
	SF3B4
	SF3B5
	SFMBT1
	SFT2D2
	SFTA2
	SFTPD
	SFXN4
	SFXN5
	SGOL2
	SH2D4A
	SHFM1
	SHISA8
	SHOX
	SHPK
	SI
	SIRT1
	SIRT6
	SKA3
	SKAP1
	SKP2
	SLC13A1
	SLC15A3
	SLC15A4
	SLC18A3
	SLC25A1
	SLC25A10
	SLC25A19
	SLC25A4
	SLC29A1
	SLC32A1
	SLC34A2
	SLC35B4
	SLC35E2
	SLC36A1
	SLC36A4
	SLC39A10
	SLC45A3
	SLC6A10P
	SLC6A20
	SLC6A5
	SLC7A2
	SLC7A6
	SLC7A7
	SLC9C2
	SLITRK4
	SLU7
	SMAD9
	SMARCA5-AS1
	SMARCB1
	SMARCC2
	SMARCD2
	SMG8
	SMOC1
	SMPX
	SMYD2
	SMYD5
	SNAP25
	SNAP47
	SNAPC4
	SNAPC5
	SNAR-B1
	SNAR-C1
	SNAR-D
	SND1
	SNHG12
	SNHG5
	SNHG7
	SNIP1
	SNORA27
	SNORA38B
	SNORA45
	SNORA52
	SNORA64
	SNORA65
	SNORA74A
	SNORD101
	SNORD109A
	SNORD113-3
	SNORD114-1
	SNORD114-17
	SNORD114-2
	SNORD114-3
	SNORD115-17
	SNORD115-27
	SNORD115-35
	SNORD116-1
	SNORD116-11
	SNORD116-14
	SNORD116-15
	SNORD116-16
	SNORD116-17
	SNORD116-18
	SNORD116-2
	SNORD116-20
	SNORD116-21
	SNORD116-23
	SNORD116-24
	SNORD116-25
	SNORD116-26
	SNORD116-27
	SNORD116-28
	SNORD116-3
	SNORD116-30
	SNORD116-5
	SNORD116-6
	SNORD116-8
	SNORD12
	SNORD125
	SNORD126
	SNORD12B
	SNORD12C
	SNORD14A
	SNORD35B
	SNORD38B
	SNORD4B
	SNORD59A
	SNORD59B
	SNORD66
	SNORD72
	SNORD75
	SNORD83A
	SNORD83B
	SNORD84
	SNORD88A
	SNRNP27
	SNRNP48
	SNRPC
	SNRPD1
	SNRPF
	SNRPN
	SNX11
	SNX9
	SOLH
	SORBS1
	SOX18
	SOX9
	SP9
	SPAG5
	SPANXB1
	SPARCL1
	SPATA13-AS1
	SPATA17
	SPATA5L1
	SPATS2L
	SPCS1
	SPCS3
	SPDYC
	SPHAR
	SPN
	SPP1
	SPRN
	SPRYD4
	SRCRB4D
	SREBF1
	SRFBP1
	SRG7
	SRP9
	SRRT
	SRSF2
	SRSF3
	SSTR1
	SSX2
	ST14
	ST3GAL2
	ST3GAL6-AS1
	STARD6
	STEAP1B
	STON1-GTF2A1L
	STRA13
	STXBP2
	STXBP6
	SUCLG1
	SULF2
	SULT6B1
	SUMO1
	SUPT4H1
	SUPV3L1
	SUZ12
	SWSAP1
	SYAP1
	SYCP2L
	SYNCRIP
	SYNDIG1L
	SYNE2
	TAC1
	TACO1
	TADA1
	TAF11
	TAF5L
	TAGLN2
	TARBP2
	TAS1R2
	TASP1
	TBC1D1
	TBC1D30
	TBCC
	TBK1
	TBL3
	TBX5-AS1
	TCAM1P
	TCHHL1
	TCHP
	TCIRG1
	TCL1B
	TCP1
	TDG
	TDP2
	TDRD7
	TEAD1
	TEAD3
	TEAD4
	TECR
	TEKT1
	TERT
	TEX15
	TEX26
	TEX28
	TFAM
	TFAP2B
	TFB2M
	TFCP2
	THEGL
	THOC6
	THSD7A
	TIMD4
	TIMELESS
	TIMM13
	TIMM21
	TIMM23
	TIMM50
	TK1
	TKTL1
	TLCD1
	TLE4
	TLR7
	TM9SF1
	TMA16
	TMC3
	TMC5
	TMCO7
	TMED2
	TMED5
	TMEM11
	TMEM176A
	TMEM178B
	TMEM184C
	TMEM208
	TMEM229A
	TMEM45A
	TMEM69
	TMEM88B
	TMEM8A
	TMF1
	TMPRSS11E
	TMUB1
	TNPO2
	TNPO3
	TOB1
	TOB2
	TOB2P1
	TOMM22
	TOMM6
	TOPBP1
	TOPORS
	TPBG
	TPI1
	TPPP
	TPRN
	TRA2B
	TRABD
	TRAF2
	TRAJ16
	TRAJ17
	TRAJ54
	TRAJ61
	TRAP1
	TRAV1-1
	TRAV4
	TRAV6
	TRAV8-1
	TRAV9-1
	TRBV7-3
	TRDJ2
	TRDJ3
	TREX1
	TRIAP1
	TRIM28
	TRIM29
	TRIM36
	TRIM6-TRIM34
	TRIM72
	TRIM77P
	TRIP13
	TRIP6
	TRMT2A
	TRMU
	TRNAI6
	TROVE2
	TRPV6
	TRUB2
	TSFM
	TSG101
	TSPAN31
	TSPAN4
	TSPO
	TSPYL1
	TTC1
	TTC33
	TTC6
	TTF1
	TTK
	TUBA4B
	TUBB
	TUBB4A
	TUBGCP2
	TULP1
	TULP3
	TUSC2
	TXN2
	TXNDC17
	TXNIP
	TYMS
	TYRP1
	UBAC1
	UBAP2L
	UBC
	UBE2C
	UBE2DNL
	UBE2N
	UBL5
	UBLCP1
	UBTFL1
	UBXN11
	UCP2
	UFC1
	UGT2B4
	UHMK1
	UHRF1
	UMOD
	UNC45B
	UNC93B1
	UNG
	UNK
	UNQ6975
	UPK3A
	UQCRHL
	UQCRQ
	URM1
	USMG5
	USP43
	USPL1
	UTP20
	UTP6
	VAMP8
	VANGL2
	VARS
	VCX2
	VDAC2
	VIM
	VNN1
	VOPP1
	VPS25
	VPS33A
	VPS4B
	VRK3
	VTA1
	VTI1A
	VTRNA2-1
	WAPAL
	WBP11
	WDR12
	WDR46
	WDR52
	WDR83
	WDR91
	WIBG
	WLS
	WNT10B
	WWC1
	WWP2
	XKR6
	XPNPEP3
	XPO4
	XRCC6
	XRCC6BP1
	YBEY
	YDJC
	YEATS4
	YIPF2
	YIPF5
	YWHAG
	YWHAH
	ZAK
	ZAN
	ZBED4
	ZBTB2
	ZBTB40
	ZBTB6
	ZBTB9
	ZC3H10
	ZC3HAV1
	ZC3HC1
	ZCCHC10
	ZCCHC16
	ZCCHC18
	ZDHHC12
	ZDHHC6
	ZFC3H1
	ZKSCAN4
	ZMAT2
	ZNF146
	ZNF2
	ZNF200
	ZNF212
	ZNF214
	ZNF215
	ZNF22
	ZNF286B
	ZNF311
	ZNF323
	ZNF334
	ZNF385D
	ZNF398
	ZNF451
	ZNF480
	ZNF511
	ZNF534
	ZNF597
	ZNF622
	ZNF648
	ZNF692
	ZNF697
	ZNF775
	ZNF791
	ZNF804A
	ZSCAN21
	ZSCAN5A
	ZSWIM6
	ZWINT

## Sheet: (2) Functional analysis Summary
Biological pathway	No. of genes in the data set		No. of genes in the background data set	Percentage of genes		Fold Enrichment	Uncorrected p-value (Hypergeometric test)	Corrected p-value (Bonferroni method)	Corrected p-value (BH method)	Storey and Tibshirani method q-value	Genes mapped from input data set
ubiquinone-10 biosynthesis (eukaryotic)	2		3	2.1978		49.7308	0.00067631	0.339508	0.019971	0.0117942	COQ3,COQ7
Mitochondrial transcription initiation	2		4	2.1978		40.2582	0.00133925	0.672303	0.0305592	0.0180472	TFAM,TFB2M
fatty acid beta-oxidation I	3		19	3.2967		13.6488	0.00274556	1	0.0510471	0.0290699	ACSL3,ECHS1,ECI1
Intrinsic Pathway for Apoptosis	4		31	4.3956		10.5867	0.00114049	0.572525	0.0318069	0.0178043	BAK1,BID,DIABLO,VIM
Fatty Acyl-CoA Biosynthesis	5		18	5.49451		21.1145	5.27728e-06	0.00264919	0.000441532	0.000260753	ACLY,ACSL3,FASN,SLC25A1,TECR
Eukaryotic Translation Elongation	6		83	6.59341		5.59627	0.00152762	0.766866	0.033342	0.0196906	RPL11,RPL12,RPL27A,RPL34,RPL6,RPLP0
Fatty acid, triacylglycerol, and ketone body metabolism	7		83	7.69231		6.36817	0.000238696	0.119826	0.00855897	0.00505461	ACLY,ACSL3,ECHS1,ECI1,FASN,SLC25A1,TECR
The citric acid (TCA) cycle and respiratory electron transport	16		118	17.5824		9.40722	1.36514e-11	6.85301e-09	6.85301e-09	4.04714e-09	ACO2,ATP5B,ATP5D,ATP5F1,ATP5G1,ATP5H,COX6A1,COX7C,CS,NDUFA7,NDUFB10,NDUFB8,NDUFS1,NDUFS3,NDUFS6,SUCLG1
				Ubiquinone-10 biosynthesis (eukaryotic)			2	0.0117942
				Mitochondrial transcription Initiation			2	0.0180472
				fatty acid beta-oxidation I			3	0.0290699
				Intrinsic Pathway for Apoptosis			4	0.0178043
				Fatty Acyl-CoA Biosynthesis			5	0.000260753
				Eukaryotic Translation Elongation			6	0.0196906
				Fatty acid, triacylglycerol, and ketone body metabolism			7	0.00505461
				The citric acid (TCA) cycle and respiratory electron transport			16	4.04714e-09

## Sheet: (2) Gene details
Name of data set: Mito ups
No. of mapped items: 177
No. of unmapped items: 0
No. of redundant items: 0
Is data set quantitative :NO
Mapped items:
Search Term	Enrtez GeneID		Gene Symbol	Description	Alternate names	Chromosome	Map location
ABCB10	23456		ABCB10	ATP-binding cassette, sub-family B (MDR/TAP), member 10	EST20237|M-ABC2|MTABC2	1	1q42.13
ABCE1	6059		ABCE1	ATP-binding cassette, sub-family E (OABP), member 1	ABC38|OABP|RLI|RNASEL1|RNASELI|RNS4I	4	4q31
ABHD11	83451		ABHD11	abhydrolase domain containing 11	WBSCR21	7	7q11.23
ACLY	47		ACLY	ATP citrate lyase	ACL|ATPCL|CLATP	17	17q21.2
ACO2	50		ACO2	aconitase 2, mitochondrial	ACONM|ICRD	22	22q13.2
ACSL3	2181		ACSL3	acyl-CoA synthetase long-chain family member 3	ACS3|FACL3|PRO2194	2	2q34-q35
ACSM5	54988		ACSM5	acyl-CoA synthetase medium-chain family member 5	-	16	16p12.3
AKAP1	8165		AKAP1	A kinase (PRKA) anchor protein 1	AKAP|AKAP121|AKAP149|AKAP84|D-AKAP1|PPP1R43|PRKA1|SAKAP84|TDRD17	17	17q22
ALDOC	230		ALDOC	aldolase C, fructose-bisphosphate	ALDC	17	17cen-q12
ALYREF	10189		ALYREF	Aly/REF export factor	ALY|ALY/REF|BEF|REF|THOC4	17	17q25.3
ANKRD18A	253650		ANKRD18A	ankyrin repeat domain 18A	-	9	9p13.1
APEX1	328		APEX1	APEX nuclease (multifunctional DNA repair enzyme) 1	APE|APE1|APEN|APEX|APX|HAP1|REF1	14	14q11.2
ATP5B	506		ATP5B	ATP synthase, H+ transporting, mitochondrial F1 complex, beta polypeptide	ATPMB|ATPSB|HEL-S-271	12	12q13.13
ATP5D	513		ATP5D	ATP synthase, H+ transporting, mitochondrial F1 complex, delta subunit	-	19	19p13.3
ATP5F1	515		ATP5F1	ATP synthase, H+ transporting, mitochondrial Fo complex, subunit B1	PIG47	1	1p13.2
ATP5G1	516		ATP5G1	ATP synthase, H+ transporting, mitochondrial Fo complex, subunit C1 (subunit 9)	ATP5A|ATP5G	17	17q21.32
ATP5H	10476		ATP5H	ATP synthase, H+ transporting, mitochondrial Fo complex, subunit d	ATPQ	17	17q25
BAK1	578		BAK1	BCL2-antagonist/killer 1	BAK|BAK-LIKE|BCL2L7|CDN1	6	6p21.3
BID	637		BID	BH3 interacting domain death agonist	FP497	22	22q11.1
BNIP3	664		BNIP3	BCL2/adenovirus E1B 19kDa interacting protein 3	NIP3	10	10q26.3
BRD8	10902		BRD8	bromodomain containing 8	SMAP|SMAP2|p120	5	5q31
BUB3	9184		BUB3	BUB3 mitotic checkpoint protein	BUB3L|hBUB3	10	10q26
BZRAP1	9256		BZRAP1	benzodiazepine receptor (peripheral) associated protein 1	PBR-IP|PRAX-1|PRAX1|RIM-BP1|RIMBP1	17	17q22-q23
C10orf10	11067		C10orf10	chromosome 10 open reading frame 10	DEPP|FIG	10	10q11.21
C10orf2	56652		C10orf2	chromosome 10 open reading frame 2	ATXN8|IOSCA|MTDPS7|PEO|PEO1|PEOA3|SANDO|SCA8|TWINL	10	10q24
CALR	811		CALR	calreticulin	CRT|HEL-S-99n|RO|SSA|cC1qR	19	19p13.3-p13.2
CANX	821		CANX	calnexin	CNX|IP90|P90	5	5q35
CCT2	10576		CCT2	chaperonin containing TCP1, subunit 2 (beta)	99D8.1|CCT-beta|CCTB|HEL-S-100n|PRO1633|TCP-1-beta	12	12q15
CDK1	983		CDK1	cyclin-dependent kinase 1	CDC2|CDC28A|P34CDC2	10	10q21.1
CHCHD10	400916		CHCHD10	coiled-coil-helix-coiled-coil-helix domain containing 10	C22orf16|N27C7-4	22	22q11.23
CLPTM1L	81037		CLPTM1L	CLPTM1-like	CRR9	5	5p15.33
COPB2	9276		COPB2	coatomer protein complex, subunit beta 2 (beta prime)	beta'-COP	3	3q23
COQ3	51805		COQ3	coenzyme Q3 methyltransferase	DHHBMT|DHHBMTASE|UG0215E05|bA9819.1	6	6q16.2
COQ7	10229		COQ7	coenzyme Q7 homolog, ubiquinone (yeast)	CAT5|CLK-1|CLK1	16	16p12.3
COX6A1	1337		COX6A1	cytochrome c oxidase subunit VIa polypeptide 1	COX6A|COX6AL	12	12q24.2|12q24.2
COX7A2	1347		COX7A2	cytochrome c oxidase subunit VIIa polypeptide 2 (liver)	COX7AL|COX7AL1|COXVIIAL|COXVIIa-L|VIIAL	6	6q12
COX7C	1350		COX7C	cytochrome c oxidase subunit VIIc	-	5	5q14
CS	1431		CS	citrate synthase	-	12	12q13.2
CXADR	1525		CXADR	coxsackie virus and adenovirus receptor	CAR|CAR4/6|HCAR	21	21q21.1
CYB5B	80777		CYB5B	cytochrome b5 type B (outer mitochondrial membrane)	CYB5-M|CYPB5M|OMB5	16	16q22.1
DDX28	55794		DDX28	DEAD (Asp-Glu-Ala-Asp) box polypeptide 28	MDDX28	16	16q22.1
DIABLO	56616		DIABLO	diablo, IAP-binding mitochondrial protein	DFNA64|SMAC	12	12q24.31
DNA2	1763		DNA2	DNA replication helicase/nuclease 2	DNA2L|PEOA6|SCKL8|hDNA2	10	10q21.3-q22.1
DNAJB11	51726		DNAJB11	DnaJ (Hsp40) homolog, subfamily B, member 11	ABBP-2|ABBP2|DJ9|Dj-9|EDJ|ERdj3|ERj3|ERj3p|PRO1080|UNQ537	3	3q27.3
DNM1	1759		DNM1	dynamin 1	DNM	9	9q34
ECHS1	1892		ECHS1	enoyl CoA hydratase, short chain, 1, mitochondrial	SCEH	10	10q26.2-q26.3
ECI1	1632		ECI1	enoyl-CoA delta isomerase 1	DCI	16	16p13.3
ENDOG	2021		ENDOG	endonuclease G	-	9	9q34.1
ERP29	10961		ERP29	endoplasmic reticulum protein 29	C12orf8|ERp28|ERp31|HEL-S-107|PDI-DB|PDIA9	12	12q24.13
ESYT1	23344		ESYT1	extended synaptotagmin-like protein 1	FAM62A|MBC2	12	12q13.2
EZR	7430		EZR	ezrin	CVIL|CVL|HEL-S-105|VIL2	6	6q25.3
FAM110B	90362		FAM110B	family with sequence similarity 110, member B	C8orf72	8	8q12.1
FASN	2194		FASN	fatty acid synthase	FAS|OA-519|SDR27X1	17	17q25
FPGS	2356		FPGS	folylpolyglutamate synthase	-	9	9q34.1
GADD45GIP1	90480		GADD45GIP1	growth arrest and DNA-damage-inducible, gamma interacting protein 1	CKBBP2|CKbetaBP2|CRIF1|MRP-L59|PLINP|PLINP-1|PRG6|Plinp1	19	19p13.2
GAPDH	2597		GAPDH	glyceraldehyde-3-phosphate dehydrogenase	G3PD|GAPD|HEL-S-162eP	12	12p13
GCAT	23464		GCAT	glycine C-acetyltransferase	KBL	22	22q13.1
GHITM	27069		GHITM	growth hormone inducible transmembrane protein	DERP2|HSPC282|MICS1|PTD010|TMBIM5	10	10q23.1
HMGB1	3146		HMGB1	high mobility group box 1	HMG1|HMG3|SBP-1	13	13q12
HMGB2	3148		HMGB2	high mobility group box 2	HMG2	4	4q31
HNRNPA1	3178		HNRNPA1	heterogeneous nuclear ribonucleoprotein A1	ALS19|ALS20|HNRPA1|HNRPA1L3|IBMPFD3|hnRNP A1|hnRNP-A1	12	12q13.1
HNRNPK	3190		HNRNPK	heterogeneous nuclear ribonucleoprotein K	CSBP|HNRPK|TUNP	9	9q21.32-q21.33
HPN	3249		HPN	hepsin	TMPRSS1	19	19q13.12
HSD3B2	3284		HSD3B2	hydroxy-delta-5-steroid dehydrogenase, 3 beta- and steroid delta-isomerase 2	HSD3B|HSDB|SDR11E2	1	1p13.1
HSP90AB1	3326		HSP90AB1	heat shock protein 90kDa alpha (cytosolic), class B member 1	D6S182|HSP84|HSP90B|HSPC2|HSPCB	6	6p12
HSP90B1	7184		HSP90B1	heat shock protein 90kDa beta (Grp94), member 1	ECGP|GP96|GRP94|HEL-S-125m|HEL35|TRA1	12	12q24.2-q24.3
HSPA5	3309		HSPA5	heat shock 70kDa protein 5 (glucose-regulated protein, 78kDa)	BIP|GRP78|HEL-S-89n|MIF2	9	9q33.3
IQCE	23288		IQCE	IQ motif containing E	1700028P05Rik	7	7p22.3
KIAA1279	26128		KIAA1279	KIAA1279	KBP|TTC20	10	10q22.1
KMO	8564		KMO	kynurenine 3-monooxygenase (kynurenine 3-hydroxylase)	dJ317G22.1	1	1q42-q44
LMNB1	4001		LMNB1	lamin B1	ADLD|LMN|LMN2|LMNB	5	5q23.2
LRRK1	79705		LRRK1	leucine-rich repeat kinase 1	RIPK6|Roco1	15	15q26.3
MCAT	27349		MCAT	malonyl CoA:ACP acyltransferase (mitochondrial)	FASN2C|MCT|MT|NET62|fabD	22	22q13.31
MCL1	4170		MCL1	myeloid cell leukemia 1	BCL2L3|EAT|MCL1-ES|MCL1L|MCL1S|Mcl-1|TM|bcl2-L-3|mcl1/EAT	1	1q21
MDH1	4190		MDH1	malate dehydrogenase 1, NAD (soluble)	HEL-S-32|MDH-s|MDHA|MGC:1375|MOR2	2	2p13.3
METTL17	64745		METTL17	methyltransferase like 17	METT11D1	14	14q11.2
MIPEP	4285		MIPEP	mitochondrial intermediate peptidase	HMIP|MIP	13	13q12
MMAB	326625		MMAB	methylmalonic aciduria (cobalamin deficiency) cblB type	ATR|cblB|cob	12	12q24
MRPL1	65008		MRPL1	mitochondrial ribosomal protein L1	BM022|L1MT|MRP-L1	4	4q21.1
MRPL12	6182		MRPL12	mitochondrial ribosomal protein L12	5c5-2|L12mt|MRP-L31/34|MRPL7|MRPL7/L12|RPML12	17	17q25
MRPL22	29093		MRPL22	mitochondrial ribosomal protein L22	L22mt|MRP-L22|MRP-L25|RPML25	5	5q33.2
MRPL27	51264		MRPL27	mitochondrial ribosomal protein L27	L27mt	17	17q21.3-q22
MRPL28	10573		MRPL28	mitochondrial ribosomal protein L28	MAAT1|p15	16	16p13.3
MRPL35	51318		MRPL35	mitochondrial ribosomal protein L35	L35mt|MRP-L35	2	2p11.2
MRPL4	51073		MRPL4	mitochondrial ribosomal protein L4	CGI-28|L4mt	19	19p13.2
MRPL41	64975		MRPL41	mitochondrial ribosomal protein L41	BMRP|MRP-L27|MRPL27|RPML27	9	9q34.3
MRPL44	65080		MRPL44	mitochondrial ribosomal protein L44	COXPD16|L44MT|MRP-L44	2	2q36.1
MRPL45	84311		MRPL45	mitochondrial ribosomal protein L45	L45mt|MRP-L45	17	17q21.2
[truncated: 89 more rows]

## Sheet: (2) Cellular component
Analysis:Cellular component
Name of data set: Mito ups
[truncated: 105 more rows]

## Sheet: (2) Molecular function
Analysis:Molecular function
[truncated: 53 more rows]

[truncated: 6 more sheets: (2) Biological process, (2) Biological pathway, (2) Protein domain, (2) Site of expression, (2) Transcription factor, (2) Clinical phenotypes]
