# Supplementary material for: Chemotherapy-Resistant Human Acute Myeloid Leukemia Cells Are Not Enriched for Leukemic Stem Cells but Require Oxidative Metabolism
Source: Oxford University Press journal article supplement (doi:10.1158/2159-8290.cd-16-0441), 2017-04-17
Supplement: 21598290cd160441-sup-164075_2_unknown_upload_3967993_kk1kc3.xlsx [file 21598290cd160441-sup-164075_2_unknown_upload_3967993_kk1kc3.xlsx]

## Sheet: finale
Table S12 GSEA score of all gene signatures used in this study.
Name Gene Signature		AraC vs. PBS in PDX				LowR vs. HighR in PDX				No. Genes	Curated Gene Set Collection
		NES	p value	FDR qvalue		NES	p value	FDR qvalue
High OxPhos		1.48	0.006	0.053		2.16	0.0001	0.0001		221	Cancer Discovery
High CD36		3.31	0.0001	0.0001		1.44	0.0001	0.041		328	Cancer Discovery
High FA Metabolism		1.44	0.02	0.02		0.86	0.68	0.87		39	Cancer Discovery
High Rechute		3.28	0.0001	0.0001		2.12	0.0001	0.0001		139	Hackl-2014
High Resistance (IC50+0S)		1.8	0.004	0.007		1.16	0.26	0.32		14	Yan-2016
Apoptosis		1.54	0.0001	0.048		1.08	0.2	0.42		431	GO
ROS		1.5	0.05	0.052		0.68	0.94	0.97		36	Houtis-2006
LSC		-1.74	0.0001	0.0001		1.22	0.095	0.23		134	Eppert-2011
LSC17		-1.73	0.0001	0.0001		1.73	0.01	0.003		17	Ng-2016
